# Supplementary material for: Cell-SELEX Identifies a “Sticky” RNA Aptamer Sequence
Source: J Nucleic Acids. 2017 Jan 17;2017:4943072. doi: 10.1155/2017/4943072 (PMC5282457; doi:10.1155/2017/4943072)
Supplement: Supplementary file 1 — Supplementary Table: High throughput sequences (HTS) Round R1 through R7: The sequences obtained from the HTS (R1 through R7), their respective counts and the percentage of their representation in each round are tabulated. Supplementary Figure 1: Sequence alignment of M7-14 (aptamer) and Sel 3 (starting library) clones: Sequence alignment of Sel 3 clones confirmed the randomness of the variable region, indicating that the early enrichment of M7-14 sequence was not a consequence of bias in the initial starting library. Supplementary Figure 2: Cell internalization assay of the selected aptamers by flow-cytometry: SA-PE labeled aptamers and the control Sel 3 library (180 nM) were incubated with the Panc-1 cells for 30 minutes at 37⁰C. Supplementary Figure 3: Cell internalization assay of the Variable Region (VR M7-14, 21 nt “domain”) by flow cytometry. [file 4943072.f1.xlsx]

## Sheet: Clusters
Sequence	Round1.count	Round1.percent	Round2.count	Round2.percent	Round3.count	Round3.percent	Round4.count	Round4.percent	Round5.count	Round5.percent	Round6.count	Round6.percent	Round7.count	Round7.percent	total.count
GGTGTCGTAGGGCCGAACTCATCGTTCCAGGCCCCGTGC	3736300	0.6353	1118693	0.7979	2576296	0.7703	7334746	0.6823	5615953	0.7944	12960539	0.829	11524458	0.7883	44866985
GTGAGTGTAGGGCCGAACTCATCGTTCCAGGCCCCGTGC	58615	0.01	9876	0.007	39465	0.0118	420758	0.0391	133728	0.0189	435564	0.0279	409479	0.028	1507485
GTGATGTGTAGGGCCGAACTCATCGTTCCAGGCCCCGTGC	4484	0.0008	1292	0.0009	6414	0.0019	74635	0.0069	42413	0.006	153425	0.0098	151874	0.0104	434537
GGTGTCGTAGGGCCGAACTCATCGTTCCAGGCCCGTGC	20109	0.0034	5869	0.0042	13842	0.0041	46995	0.0044	50743	0.0072	112094	0.0072	87529	0.006	337181
GGTGTCGTAGGGCCGAACTCATCGTTCCAGGCCCCCGTGC	55097	0.0094	15233	0.0109	39110	0.0117	93326	0.0087	61242	0.0087	103407	0.0066	129980	0.0089	497395
GGTGTCGTAGGCCGAACTCATCGTTCCAGGCCCCGTGC	64914	0.011	15053	0.0107	33254	0.0099	76491	0.0071	40502	0.0057	91979	0.0059	87319	0.006	409512
GGTGTCGTAGGGCCGAAACTCATCGTTCCAGGCCCCGTGC	15481	0.0026	4474	0.0032	7545	0.0023	20677	0.0019	16870	0.0024	35344	0.0023	36223	0.0025	136614
GAAGCGAAACAGGGCGCACCCATCGTGCCAGCCCCGTCTG	74130	0.0126	531	0.0004	16	0	30	0	0	0	1	0	0	0	74708
GGTGTCGTAGGGCCGAACTCATCGTTCCCAGGCCCCGTGC	19424	0.0033	7683	0.0055	15740	0.0047	27287	0.0025	19853	0.0028	30128	0.0019	41480	0.0028	161595
GAAGCGAAACAGGGCGCACCCATCGTGCCAGCCCGTCTG	18358	0.0031	152	0.0001	5	0	5	0	0	0	0	0	0	0	18520
GAAGCGAAAACAGGGCGCACCCATCGTGCCAGCCCCGTCTG	14828	0.0025	111	0.0001	1	0	4	0	0	0	0	0	1	0	14945
GGTGTCGTAGGGCCGAATCATCGTTCCAGGCCCCGTGC	1715	0.0003	652	0.0005	1816	0.0005	7767	0.0007	5345	0.0008	14130	0.0009	15309	0.001	46734
GGTGTCGTAAGGGCCGAACTCATCGTTCCAGGCCCCGTGC	11681	0.002	2976	0.0021	4527	0.0014	9351	0.0009	4376	0.0006	5221	0.0003	6974	0.0005	45106
GGTGTCGTAGGGCCGAACTCAATCGTTCCAGGCCCCGTGC	2167	0.0004	812	0.0006	2194	0.0007	7184	0.0007	6824	0.001	15762	0.001	16902	0.0012	51845
GTGAGTGTAGGGCCGAACTCATCGTTCCAGGCCCCCGTGC	1035	0.0002	174	0.0001	841	0.0003	5815	0.0005	1677	0.0002	3426	0.0002	4754	0.0003	17722
GTGATGTGTAGGGCCGAACTCATCGTTCCAGGCCCCCGTGC	197	0	42	0	243	0.0001	1992	0.0002	914	0.0001	2271	0.0001	3598	0.0002	9257
TGAGTTGTAGGGCCGAATCATCGTTCCAGGCCCCGTGC	3255	0.0006	784	0.0006	1984	0.0006	6011	0.0006	2717	0.0004	2367	0.0002	4182	0.0003	21300
GGTGTCGGTAGGGCCGAACTCATCGTTCCCAGGCCCCGTGC	1493	0.0003	630	0.0004	1120	0.0003	1719	0.0002	2022	0.0003	2324	0.0001	2382	0.0002	11690
GGTGTCGTAGGGCCGAACTCATCGTCCAGGCCCCGTGC	4545	0.0008	1286	0.0009	2838	0.0008	9988	0.0009	7276	0.001	18998	0.0012	15019	0.001	59950
GTGAGTGTAGGCCGAACTCATCGTTCCAGGCCCCGTGC	410	0.0001	56	0	263	0.0001	3064	0.0003	876	0.0001	3712	0.0002	3257	0.0002	11638
GGTGTCGTAGGGCCGAAACTCATCGTTCCAGGCCCCCGTGC	1534	0.0003	398	0.0003	805	0.0002	2235	0.0002	1643	0.0002	3162	0.0002	3704	0.0003	13481
GTGAGTGTAGGGCCGAACTCATCGTTCCAGGCCCGTGC	405	0.0001	65	0	189	0.0001	2074	0.0002	817	0.0001	2432	0.0002	1862	0.0001	7844
GGACCTATGCAGTAGCCAGTGTGGACTGGGCTGCCCCCC	3805	0.0006	8	0	0	0	45	0	1	0	0	0	0	0	3859
GGTGTCGTAGGGCCGAACTCATCGTTCCCAGGCCCCCGTGC	1303	0.0002	519	0.0004	1215	0.0004	2025	0.0002	1786	0.0003	2837	0.0002	4392	0.0003	14077
CACTAGCCAGGATAGACCGTAGCAACGTCACTGCCCGCCC	3150	0.0005	14	0	0	0	9	0	0	0	1	0	0	0	3174
GTGATGTCGTAGGGCCGAACTCATCGTTCCAGGCCCCGTGC	4445	0.0008	1020	0.0007	6029	0.0018	75208	0.007	44413	0.0063	177948	0.0114	195001	0.0133	504064
GTGAGTGTAGGGCCGAAACTCATCGTTCCAGGCCCCGTGC	372	0.0001	85	0.0001	253	0.0001	2378	0.0002	793	0.0001	2415	0.0002	2387	0.0002	8683
GAAGCGAAAACAGGGCGCACCCATCGTGCCAGCCCGTCTG	2332	0.0004	15	0	1	0	0	0	0	0	0	0	0	0	2348
GTGATGTGTAGGCCGAACTCATCGTTCCAGGCCCCGTGC	48	0	12	0	63	0	719	0.0001	332	0	1394	0.0001	1289	0.0001	3857
GGTGCGTAGGGCCGAACTCATCGTTCCAGGCCCCGTGC	5748	0.001	1632	0.0012	4178	0.0012	14300	0.0013	15333	0.0022	35255	0.0023	28476	0.0019	104922
GGTGTCGGTAGGGCCGAACTCATCGTTCCAGGCCCCGTGC	734	0.0001	355	0.0003	1269	0.0004	4275	0.0004	9385	0.0013	17858	0.0011	14411	0.001	48287
GGTGTCGTAGGGCCGAACTCATCGTTCCAGGCCCCGTCGC	14690	0.0025	2670	0.0019	4363	0.0013	9111	0.0008	3330	0.0005	5970	0.0004	5565	0.0004	45699
GTGTGTGTAGGGCCGAACTCATCGTTCCCAGGCCCCGTGC	1150	0.0002	506	0.0004	877	0.0003	2546	0.0002	995	0.0001	1471	0.0001	1871	0.0001	9416
TGAGTTGTAGGGCCGAACTCATCGTTCCAGGCCCCGTGC	354587	0.0603	110740	0.079	342971	0.1025	1486713	0.1383	510535	0.0722	684564	0.0438	1110449	0.076	4600559
GGTGTCGTAGGCCGAACTCATCGTTCCAGGCCCCCGTGC	667	0.0001	163	0.0001	419	0.0001	1115	0.0001	694	0.0001	1421	0.0001	1793	0.0001	6272
GGGTGTCGTAGGGCCGAACTCATCGTTCCAGGCCCCGTGT	1071	0.0002	214	0.0002	570	0.0002	3450	0.0003	2182	0.0003	2214	0.0001	1728	0.0001	11429
GGTGTCGTAGGGCCGAACCTCATCGTCCCAGGCCCGTGC	117	0	52	0	160	0	551	0.0001	617	0.0001	1676	0.0001	1496	0.0001	4669
GTGATGTGTAGGGCCGAAACTCATCGTTCCAGGCCCCGTGC	74	0	21	0	57	0	588	0.0001	296	0	1017	0.0001	1179	0.0001	3232
GTGATGTGTAGGGCCGAACTCATCGTTCCAGGCCCGTGC	95	0	10	0	66	0	652	0.0001	295	0	953	0.0001	918	0.0001	2989
GTCGACCATCCACTGCGGAACATGTTATATGTAGCCGCCC	1560	0.0003	4	0	0	0	0	0	0	0	0	0	0	0	1564
TGAGTTGTAGGGCCGAACTCATCGTTCCAAGCCCCGTGC	978	0.0002	373	0.0003	547	0.0002	1352	0.0001	521	0.0001	550	0	919	0.0001	5240
GGTGTCGTAGGGCCGAAACTCATCGTTCCCAGGCCCCGTGC	1067	0.0002	428	0.0003	485	0.0001	931	0.0001	568	0.0001	845	0.0001	1171	0.0001	5495
AGTGTGTAGGCGGCAACTCATCGTTCCAGGCCCCGTGC	1402	0.0002	221	0.0002	363	0.0001	1022	0.0001	119	0	118	0	113	0	3358
GGTGTCGTAGGGCCGAACCTCATTCCTGCCCAGGCCGCG	41	0	6	0	21	0	188	0	113	0	748	0	610	0	1727
GTGATGTCGTAGGGCCGAACTCATCGTTCCCAGGCCCCGTGC	68	0	25	0	87	0	437	0	335	0	736	0	841	0.0001	2529
AGTGTTGTAGGGCCGAACTCAATCGTTCCAGGCCCCGTGC	1413	0.0002	370	0.0003	721	0.0002	2070	0.0002	682	0.0001	848	0.0001	1652	0.0001	7756
TCTGGCTGAGATGGCGTTGCATTATATCGCCGGGCCCCCC	1083	0.0002	8	0	0	0	17	0	1	0	0	0	1	0	1110
GAAGCGAAAACAGGGCGCACCCCATCGTGCCAGCCCCGTCTG	1061	0.0002	2	0	1	0	2	0	0	0	0	0	0	0	1066
GGTGTCGTAGGGCCGAACCTCATCCTGCCCAGGCCGCG	18	0	6	0	18	0	173	0	184	0	918	0.0001	657	0	1974
AGTGTTGTAGGCCGAACTCATCGTTCCCAGGCCCCGTGC	691	0.0001	185	0.0001	382	0.0001	822	0.0001	262	0	233	0	535	0	3110
GGTGCGTAGGGGCCGAACTCATCGTTCCAGGCCCCGTGC	310	0.0001	87	0.0001	191	0.0001	564	0.0001	308	0	647	0	658	0	2765
GAAGCGAAACAGGGCGCACCCCATCGTGCCAGCCCCGTCTG	1151	0.0002	9	0	0	0	1	0	0	0	0	0	0	0	1161
GGGTGTCGTAGGGGCCGAAACTCATCGTTCCAGGCCCCGTGC	142	0	63	0	120	0	413	0	530	0.0001	917	0.0001	968	0.0001	3153
GAAGCGAAAACAGGGGCGCACCCATCGTGCCAGCCCCGTCTG	766	0.0001	5	0	0	0	0	0	0	0	0	0	0	0	771
GGTGTCGTAGGGCCGAACCTCATTCCTGCCCGGCCGCG	22	0	6	0	22	0	130	0	207	0	625	0	588	0	1600
GTGAGTGTAGGGCCGAACTCATCTTCCAGGCCCCGTGC	67	0	10	0	33	0	514	0	156	0	674	0	648	0	2102
GGTGTCGTAGGGCCGAACCTCATTCCGTGCCCAGGCCCGTCG	8	0	2	0	15	0	83	0	23	0	368	0	350	0	849
GGTGTCGTAGGGCCGAACCTCATCCGTGCCCAGGCCCGTCG	14	0	3	0	20	0	112	0	133	0	611	0	423	0	1316
GACGTGCTAAGCTGTTCGGGTATTGCGTAGGCCGCCCCCC	749	0.0001	3	0	0	0	0	0	0	0	0	0	0	0	752
GGTATTACGCAGTAGCTGGGAGAGCCTAGACTGCGCCCCC	742	0.0001	0	0	0	0	2	0	0	0	0	0	0	0	744
GGTGTCGGTAGGGCCGAACTCATCGTTCCAGGCCCGTGC	218	0	65	0	103	0	333	0	527	0.0001	1005	0.0001	846	0.0001	3097
GTGATGTCGTAGGGCCGAACTCATCGTTCCAGGCCCGTGC	100	0	2	0	67	0	1106	0.0001	641	0.0001	2148	0.0001	2446	0.0002	6510
GAGTGTGTAGGGCCGAACTCATTCGTTCCAGGCCCCGTGC	601	0.0001	65	0	123	0	581	0.0001	106	0	245	0	202	0	1923
TGAGTTGTAGGGCCGAACTCATCTTCCAGGCCCCGTGC	177	0	41	0	122	0	945	0.0001	245	0	765	0	996	0.0001	3291
GGTGTCGTAGGGCCGAACTCATCGTTGCCCAGGCCCCGTGC	112	0	61	0	143	0	554	0.0001	503	0.0001	1124	0.0001	1232	0.0001	3729
AGTGTGTAGGACGGCAACTCATCGTTCCAGGCCCCGTGC	846	0.0001	93	0.0001	143	0	370	0	49	0	44	0	39	0	1584
AGTGTTGTAGGGCCGAACTCATCGTTCCAGGCCCGGTGC	19828	0.0034	2267	0.0016	2075	0.0006	3574	0.0003	850	0.0001	1575	0.0001	1192	0.0001	31361
GGTGTCGTAGGGGGCCGAACTCATCGTTCCAGGCCCCGTGC	85	0	38	0	120	0	334	0	338	0	753	0	759	0.0001	2427
GGTGCGTAGGGCCGAACTCATCGTTCCAGGCCCCCGTGC	211	0	84	0.0001	201	0.0001	664	0.0001	621	0.0001	1324	0.0001	1389	0.0001	4494
GTGATGTCGGTAGGGCCGAACTCATCGTTCCAGGCCCCGTGC	76	0	26	0	55	0	471	0	281	0	637	0	634	0	2180
AGTGTTGTAGGGCCAAACTCATCGTTCCAGGCCCCGTGC	2270	0.0004	479	0.0003	641	0.0002	1484	0.0001	426	0.0001	673	0	618	0	6591
GGTGTCGTAGGGCCGAACTCATTTCGTTCCAGGCCCCGTGC	74	0	38	0	96	0	299	0	299	0	599	0	589	0	1994
GGTGTCGTAGGGCCGAACCTCATCCGTGCCCAGGCCGTCG	14	0	3	0	14	0	87	0	96	0	610	0	449	0	1273
GTGATGTCGTAGGGCCGAATCATCGTTCCAGGCCCCGTGC	77	0	16	0	37	0	260	0	113	0	296	0	363	0	1162
GGTGTCGTAGGGCCGAACTCATCGTCCAGGCCCGTGCC	27	0	16	0	33	0	127	0	115	0	318	0	227	0	863
TGAGTTGTAGGGCCGAACTCATCGTTCCAGGCCCGTGC	2893	0.0005	696	0.0005	1778	0.0005	8910	0.0008	3852	0.0005	4604	0.0003	6742	0.0005	29475
AGTGTTGTAGGGCCGAAACTCATCGTTCCCAGGCCCCCGTGC	220	0	70	0	121	0	175	0	88	0	141	0	198	0	1013
AGTGTGTGGACGGCGAACTCATCGTTCCAGGCCCCGTGC	373	0.0001	42	0	62	0	234	0	66	0	42	0	36	0	855
AGTGTTGTAGGGCCCGAACTCATCGTTCCAGGCCCCCGTGC	752	0.0001	177	0.0001	292	0.0001	536	0	234	0	159	0	278	0	2428
GTGATGTCGTAGGGCCGAACTCATCGTCCAGGCCCCGTGC	27	0	3	0	23	0	170	0	125	0	313	0	249	0	910
GGTGTCGTAGGGCCGAAAAACTCATCGTTCCAGGCCCCGTGC	49	0	6	0	31	0	126	0	106	0	230	0	216	0	764
GGTGTCGTAGGGCCGAACCTCATTCCGTGCCCAGGCCGTCG	4	0	1	0	8	0	67	0	27	0	307	0	260	0	674
ATGATGTTGTAGGGCCGAACTCATCGTTCCAGGCCCCGTGC	518	0.0001	73	0.0001	196	0.0001	1159	0.0001	177	0	267	0	235	0	2625
GATGTGTGTAGGGCCGAACTCATCGTTCCAGGCCCCGTGC	5191	0.0009	781	0.0006	3302	0.001	25453	0.0024	6121	0.0009	12071	0.0008	3722	0.0003	56641
GGTGTCGTAGGGCCGAACCTCATCGTGCCCAGGCCCGTCG	9	0	1	0	14	0	110	0	94	0	470	0	246	0	944
GGTGTCGTAGGGCCGAACTCATCGTTCCAGGCCCCCCCGTGC	38	0	15	0	26	0	92	0	77	0	140	0	170	0	558
GGTGTCGTAGGGCCGAACTCATCGTTCCCAGGCCCGTGC	182	0	229	0.0002	423	0.0001	1354	0.0001	1564	0.0002	3534	0.0002	3501	0.0002	10787
GGTTAGAGGCGACGTCCCGGAATCCGCGCCCATTGCCCCC	307	0.0001	0	0	0	0	1	0	0	0	0	0	0	0	308
GGTGTCGTAGGGCCGAACTCATCGTTCCAGGCCCCCCGTGC	743	0.0001	187	0.0001	381	0.0001	862	0.0001	463	0.0001	736	0	850	0.0001	4222
CAAGGCTGGGGTTTACATGAGGTCCTCACTTGTCCCGCCC	250	0	4	0	0	0	3	0	0	0	0	0	0	0	257
AGTGTATTGGACGGCGAACTCATCGTTCCAGGCCCCGTGC	568	0.0001	51	0	98	0	281	0	24	0	21	0	5	0	1048
GGTGTCGGTAGGGACCGAACTCATCGTTCCCAGGCCCCGTGC	11	0	6	0	10	0	46	0	62	0	87	0	84	0	306
GGTGTCGTAGGGCCGAAACTCATCGGTTCCAGGCCCCGTGC	113	0	36	0	98	0	290	0	226	0	581	0	738	0.0001	2082
GATGTCTGGTACGGCAACTCATCGTTCCAGGCCCCGTGC	151	0	22	0	33	0	216	0	48	0	35	0	24	0	529
GGTGTCGTAGGGCCGAACTATCGTTCCCAGGCCCCGTGC	39	0	21	0	45	0	180	0	158	0	306	0	444	0	1193
GGTGTCGTAGGGGGGCCGAACTCATCGTTCCAGGCCCCGTGC	21	0	15	0	18	0	47	0	46	0	102	0	87	0	336
GGGTGTCGTAGGGCCCGAACTCATCGTTCCAGGCCCCGTGC	160	0	43	0	155	0	924	0.0001	608	0.0001	1204	0.0001	1042	0.0001	4136
AGTGTGTTAGGACGGCAACTCATCGTTCCAGGCCCCGTGC	261	0	29	0	48	0	101	0	13	0	10	0	2	0	464
GGTGTCGTAGGCCGAACTCAATCGTTCCAGGCCCCGTGC	126	0	40	0	88	0	210	0	170	0	379	0	421	0	1434
TGAGTTGTAGGGCCGAACTCATCGTTCCAGGCCCCGGTGC	274	0	72	0.0001	214	0.0001	682	0.0001	221	0	323	0	525	0	2311
AGTGTTGTAAGGGCCGAAACTCATCGTTCCAGGCCCCGTGC	382	0.0001	101	0.0001	126	0	338	0	106	0	120	0	257	0	1430
GGTGTCGTAGGGCCGAACTCATCGTTTTTCCAGGCCCCGTGC	21	0	9	0	28	0	65	0	60	0	133	0	119	0	435
GTGATGTGTAGGGCCGAACTCATCGTTCCCAGGCCCCGTGC	48	0	8	0	40	0	418	0	246	0	638	0	966	0.0001	2364
AGTGTCTGGACGGCAACTCATCGTTCCAGGCCCCGTGC	255	0	37	0	60	0	269	0	15	0	31	0	9	0	676
GAGTGTGTAGGGCCGAACTCATCGTTCCAGGCCCCGTGCC	911	0.0002	127	0.0001	249	0.0001	2050	0.0002	467	0.0001	733	0	466	0	5003
GGTGTCGGTAGGGCCGAACTCATCGTCCAGGCCCCGTGC	50	0	25	0	49	0	163	0	154	0	334	0	271	0	1046
GGTGTCGTAGGGCCGAACTCATCGTCCAGGCCCCCGTGC	103	0	35	0	77	0	291	0	221	0	440	0	503	0	1670
TGAGTTGTAGGGCCGAACTCATCGTTCCAGGCCCCGTGT	8890	0.0015	1287	0.0009	2323	0.0007	12677	0.0012	4116	0.0006	3680	0.0002	4142	0.0003	37115
GGTGTCGTAGGGCCGAAAACTCATCGTTCCAGGCCCCGTGC	59	0	21	0	80	0	333	0	278	0	690	0	649	0	2110
GGTGTCGTAGGGCCGAAACTATCGTTCCAGGCCCCGTGC	48	0	14	0	34	0	117	0	177	0	323	0	363	0	1076
GGTGTCGTAGGGCCGAACTCATCCGTTCCCAGGCCCCGTGC	120	0	44	0	99	0	255	0	262	0	516	0	624	0	1920
GTGTGTGTAGGGCCAACTCATCGTTCCAGGCCCCGTGC	131	0	16	0	83	0	729	0.0001	131	0	487	0	350	0	1927
GGTGTCGTAGGGCCGAACCTCATTCCGATGCCCAGGCCGTCG	2	0	2	0	2	0	18	0	13	0	92	0	102	0	231
GAGTGTGTAGGGCCGAAACTCATCGTTCCAGGCCCCCGTGC	141	0	33	0	62	0	299	0	75	0	147	0	135	0	892
AGTGTTGTAGGGCCGAAAGCTCATCGTTCCAGGCCCCGTGC	333	0.0001	85	0.0001	115	0	183	0	61	0	73	0	82	0	932
AGTGTCTAGGTACGGCGAACTCATCGTTCCAGGCCCCGTGC	220	0	26	0	48	0	104	0	31	0	16	0	8	0	453
GGTGTCGTAGGGCCGAACTCATCGTTCCAAAAGGCCCCGTGC	14	0	3	0	9	0	55	0	33	0	64	0	54	0	232
GGGTGTCGTAGGGCCGAACTCATCGTCCAGGCCCGTGC	35	0	9	0	27	0	154	0	99	0	199	0	195	0	718
GGTGTCGGTAGGGCCGAACTCATCGTTCCCAGGCCCGTGC	92	0	52	0	87	0	215	0	270	0	360	0	327	0	1403
TGAGTTGTAAGGCCGAACTCATCGTTCCAGGCCCCGTGC	658	0.0001	143	0.0001	330	0.0001	1011	0.0001	289	0	429	0	723	0	3583
GTGTGTCGTAGGGCCAACTCATCGTTCCAGGCCCCGTGC	57	0	4	0	37	0	343	0	88	0	257	0	214	0	1000
GGTGTCGTAGGCCGAACTCATCGTTCCCAGGCCCGTGC	148	0	65	0	75	0	187	0	76	0	175	0	137	0	863
GGTGTCGTAGGGCCGAACCTCGTTCCATGCCCGCCGCG	5	0	3	0	9	0	44	0	23	0	140	0	176	0	400
GGACCTATGCAGTAGCCAGTGTGGACCTGGGCTGCCCCCC	387	0.0001	0	0	0	0	4	0	0	0	0	0	0	0	391
GGTGTCGTAGGGCCGAACTCAAAATCGTTCCAGGCCCCGTGC	21	0	8	0	31	0	83	0	62	0	162	0	117	0	484
CACTAGCCAGGATAGACCGTAGCAACGTCACCTGCCCGCCC	203	0	2	0	0	0	0	0	0	0	1	0	0	0	206
AGTGTTGTAGGGCCGAAACTCATCGTTCCAGGCCCGTGC	214	0	53	0	66	0	226	0	73	0	106	0	125	0	863
GTGAGTCGTAGGCCGAACTCATCGTTCCAGGCCCGTGC	52	0	8	0	31	0	289	0	136	0	370	0	413	0	1299
GGTGTCGGTAGGGCCGAACTCAATCGTTCCAGGCCCCGTGC	16	0	5	0	19	0	53	0	186	0	231	0	219	0	729
GGTGCGTAGGGCCGAACTCATCGTTGCCAGGCCCGTGC	83	0	60	0	51	0	135	0	71	0	127	0	128	0	655
AGTGTTGTAGGGCCGAACTCATCGTTGCCCAGGCCCCGTGC	174	0	62	0	92	0	322	0	118	0	109	0	287	0	1164
AGTGTGTAGGGCCGAACTCATCGTTCCAGGCCCCGTGCC	116	0	26	0	66	0	295	0	77	0	164	0	169	0	913
GGTGTTGTAGGGCCGGAACTCATCGTTCCAGGCCCCGCTGC	49	0	18	0	53	0	152	0	70	0	116	0	103	0	561
GTGTGTGTAAGGGCCGAACTCATCGTTCCAGGCCCCGTGC	89	0	10	0	63	0	535	0	158	0	288	0	249	0	1392
GTGAGTGTAGGGCCGAACTATCGTTCCAGGCCCCGTGC	59	0	11	0	35	0	257	0	88	0	213	0	232	0	895
GATGTGTCGTAGGGCCGAACTCATCGTTCCAGGCCCCGTGC	7354	0.0013	935	0.0007	4239	0.0013	33442	0.0031	10551	0.0015	20086	0.0013	5312	0.0004	81919
TCTGGCTGAGATGGCGTTGCATTATAGTCGCCGGGCCCCCC	180	0	0	0	0	0	7	0	0	0	0	0	0	0	187
GGTGTCGTAGGGCCGAACCCATCGTTCCAGCCCCGCTGC	33	0	11	0	38	0	137	0	130	0	229	0	327	0	905
GGTGTCGTAGGGCCGAACCTCATCGTTCCCAGGCCCGTGC	155	0	80	0.0001	101	0	313	0	393	0.0001	673	0	737	0.0001	2452
GGTGTCGTAGGGCCGAACCTCGTCCATGCCCGCCTGCG	1	0	0	0	4	0	37	0	62	0	195	0	156	0	455
GAAGCGAAACAGGGCGCACCCATCGTGCCCAGCCCCGTCTG	533	0.0001	2	0	3	0	0	0	0	0	0	0	0	0	538
AGTGTTGGTAGGCCGAACTCATCGTTCCCAGGCCCCGTGC	172	0	37	0	145	0	157	0	76	0	38	0	77	0	702
GGTGTTGTAGGGCCCGAATCATCGTTCCAGGCCCCTGC	22	0	7	0	26	0	60	0	52	0	15	0	18	0	200
TGAGTTGTAGGGCCGAACTCATCGTTCCCAGGCCCCGTGCC	90	0	31	0	67	0	172	0	102	0	85	0	175	0	722
TGAGTTGTAGGGCCCGAACTCATCGTTCCAGGCCCCGTGC	366	0.0001	102	0.0001	226	0.0001	967	0.0001	259	0	469	0	939	0.0001	3328
GGTGTCGTAGGCCGAACTCATCGTTCCCAGGCCCCGTGC	78	0	46	0	123	0	399	0	409	0.0001	892	0.0001	1093	0.0001	3040
GGTGTCGTAGGGCCGAACCTCGATTCCTGCCCAGGCCGCG	5	0	6	0	9	0	44	0	24	0	80	0	95	0	263
GGTGTCGTAGGGCCGAACTCATCGTTGCCCAGGCCCGTGC	26	0	13	0	26	0	83	0	54	0	129	0	127	0	458
GGTGTCGTAGGGACCGAACTCATCGTTCCCAGGCCCCGTGC	22	0	17	0	58	0	209	0	177	0	393	0	380	0	1256
GGTGTCGGGGTAGGGCCGAACTCATCGTTCCAGGCCCCGTGC	12	0	2	0	15	0	55	0	48	0	125	0	134	0	391
GTGAGTTGTAGGGCCGAACTCATCGTTCCCAGGCCCCGTGC	139	0	107	0.0001	148	0	842	0.0001	371	0.0001	862	0.0001	1262	0.0001	3731
GGTGTCGTAGGGCCGAACTCATCGTTCCCAGGGCCCCCGTGC	100	0	22	0	59	0	114	0	62	0	100	0	132	0	589
GGTGTCGTAGGGCCGAACTCATCCGTTCCAGGCCCCCGTGC	300	0.0001	61	0	143	0	243	0	80	0	131	0	151	0	1109
AGTGTGTTAGGACGGCGAACTCATCGTTCCAGGCCCCGTGC	253	0	36	0	47	0	91	0	33	0	17	0	8	0	485
GGTGTCGTAGGGCCGAACCTCATCTCCCAGGCCCGTGC	6	0	1	0	3	0	42	0	59	0	121	0	83	0	315
AGTGTGTAGGCCGAACTCATCGTTCCAGGCCCCCGTGC	110	0	31	0	42	0	152	0	35	0	63	0	73	0	506
GGTGTCGTAGGGCCGAAACTCATCGTCCAGGCCCCGTGC	161	0	48	0	60	0	259	0	158	0	338	0	299	0	1323
GGTGTCGTAGGGCCGAACTCATCGTTCCAGGCCCCTGTCG	151	0	24	0	88	0	599	0.0001	332	0	1622	0.0001	1017	0.0001	3833
AGTGTTGTAGGGCCCGAAACTCATCGTTCCAGGCCCCCGTGC	155	0	45	0	50	0	126	0	32	0	39	0	59	0	506
GTGAGTGTAGGGCCGAACTCATCGTTCCCAGGCCCCGTGC	38	0	18	0	67	0	472	0	262	0	648	0	1048	0.0001	2553
GTGAGTGTAGGGCCGAACTCATCGTTCCAGGCCCCTGTCG	102	0	11	0	45	0	391	0	70	0	156	0	124	0	899
GGTGTCGTAGGGCCGAACCTCGTCCATGCCCAGCCGTCG	0	0	1	0	1	0	37	0	54	0	210	0	186	0	489
GTGATGTCGTAGGGCCGAAACTCATCGTTCCAGGCCCCGTGC	16	0	2	0	15	0	212	0	91	0	443	0	401	0	1180
GTAGCTGTACTTCCCTCGTTCGGCACGCTCCGATGCCCCC	111	0	9	0	7	0	0	0	0	0	0	0	0	0	127
TGAGTTGGTAGGGCCGAACTCATCGTTCCCAGGCCCCGTGC	176	0	90	0.0001	206	0.0001	551	0.0001	404	0.0001	248	0	806	0.0001	2481
GGTGTCGTAGGGCCGAACTCATCGTTCCAGCCCGTCGC	136	0	38	0	54	0	169	0	87	0	209	0	195	0	888
TGAGTTGTAGGCCGAACTCATCGTTCCAGGCCCCGTGC	7440	0.0013	1899	0.0014	5937	0.0018	27620	0.0026	7101	0.001	11167	0.0007	16434	0.0011	77598
GTGAGTGTAGGGCCGAACTCATCGTTCCCAGGCCCCCGTGC	67	0	19	0	35	0	138	0	77	0	126	0	187	0	649
GGTGTCGTAGGGCCGAATCATCGTTCCAGGCCCCCGTGC	53	0	10	0	41	0	207	0	91	0	189	0	325	0	916
GGTGTCGGTAGGGCCGAACTCATCCGTTCCCAGGCCCCGTGC	53	0	19	0	37	0	107	0	61	0	103	0	133	0	513
GGTGTGTCGTAGGGCCGAACTCATCGTTCCAGGCCCCGTGC	685	0.0001	247	0.0002	955	0.0003	8383	0.0008	2633	0.0004	4967	0.0003	5132	0.0004	23002
GGTGTCGTAGGGCCGAACCTCATTCGTCCCAGGCCCGTGC	2	0	0	0	6	0	47	0	38	0	106	0	129	0	328
GGTGTCGTAGGGCCGAACTCATCGTTCCCAGGCCCGTCGC	34	0	12	0	32	0	65	0	59	0	167	0	158	0	527
GGTGTCGGTAGGCCGAACTCATCGTTCCCAGGCCCGTGC	32	0	7	0	27	0	37	0	54	0	53	0	43	0	253
GGTGTTGTAGGGCCGAACTCATCGTTCCAGGCCCCGCTGC	135	0	78	0.0001	193	0.0001	558	0.0001	236	0	301	0	164	0	1665
GGTGTCGTAGGGCCGAACCTCATCTGCCCAGGCCGTCG	1	0	0	0	1	0	18	0	13	0	206	0	88	0	327
TGAGTTGTAGGCCGAACTCATCGTTCCAGGCCCCCGTGC	139	0	29	0	98	0	353	0	107	0	122	0	282	0	1130
GCCATCACGTCTGAATACTGCGCGGACTACATGCCGCCCC	87	0	0	0	0	0	3	0	0	0	0	0	0	0	90
AGTGTGTAGGCCGAACTCATCGTTCCCAGGCCCCGTGC	65	0	32	0	49	0	134	0	32	0	66	0	100	0	478
GGTGTCGTAGGGCCGAATCATCGTTGCCAGGCCCGTGC	14	0	3	0	15	0	41	0	29	0	54	0	93	0	249
GGTGTCGTAGGCGAACTCATCGTTCCAGGCCCCCGTGC	24	0	11	0	14	0	65	0	31	0	77	0	83	0	305
GGTGTCGTAGGGCCGAACCATCGTCCTGCCCAGCCGCG	3	0	0	0	3	0	53	0	47	0	176	0	120	0	402
GGTGTCGTAGGGACCGAACTATCGTTCCAGGCCCCGTGC	9	0	5	0	15	0	43	0	38	0	85	0	98	0	293
GGTGTCGTAGGGCCGAACCTCGATTCCTGCCCAGCCGCG	10	0	4	0	2	0	28	0	18	0	47	0	62	0	171
GAGTGCTGGTACGGCGAACTCATCGTTCCAGGCCCCGTGC	65	0	13	0	25	0	136	0	28	0	51	0	14	0	332
GGTGTCGTAGGCCGAACTCATCGTTCCAGGCCCCGTCGC	577	0.0001	86	0.0001	162	0	399	0	133	0	221	0	249	0	1827
GGTGCGTAGGGCCGAAACTCATCGTTCCAGGCCCCGTGC	97	0	41	0	110	0	361	0	497	0.0001	1134	0.0001	845	0.0001	3085
GGTGTCGTAGGGCCGAACTCATCCGTTGCCCAGGCCCCGTGC	45	0	32	0	30	0	58	0	14	0	35	0	60	0	274
GGTGTCGTAGGGCCGAACCATCGTTCCATGCCCGCGCG	1	0	0	0	0	0	29	0	2	0	40	0	33	0	105
GGGTGTCGTAGGGCCGAACTCATCGTTCCAGGCCCCGTCGC	28	0	8	0	52	0	191	0	217	0	349	0	417	0	1262
GGTGTCGTAGGGCCGAACTCATCGTTGCCCAGGCCCCGTCGC	9	0	2	0	9	0	19	0	23	0	72	0	53	0	187
GTGAGTGTAGGGCCCGAAACTCATCGTTCCAGGCCCCGTGC	16	0	4	0	12	0	85	0	15	0	93	0	95	0	320
GGTGTCGTAGGGCCGAACCTCTTCCGATGCCCAGGCCGCG	3	0	0	0	4	0	21	0	13	0	69	0	55	0	165
GGGACCTATGCAGTAGCCAGTGTGGACTGGGCTGCCCCC	79	0	1	0	0	0	1	0	0	0	0	0	0	0	81
TGAGTTGTAAGGGCCGAACTCATCGTTCCAGGCCCGTGC	127	0	31	0	34	0	198	0	111	0	102	0	185	0	788
GGTGTCGTAGGGCCGAACCTCATCCGTGCCCAGGCCCTGTCG	1	0	0	0	2	0	2	0	11	0	37	0	39	0	92
GGTGTCGGTAGGGCCGAACTCATCGTCCAGGCCCGTGC	17	0	7	0	8	0	52	0	75	0	81	0	80	0	320
GATGTGTCGTAGGGCCGAACTCATCGTTCCAGGCCCGTGC	300	0.0001	57	0	174	0.0001	1170	0.0001	555	0.0001	704	0	337	0	3297
AGTGTTGTAGGGCCGAACCTCATCCGTTGCCCAGGCCCGTGC	49	0	25	0	26	0	48	0	12	0	19	0	34	0	213
AGTGTCGTAGGCGGCAACTCATCGTTCCAGGCCCCGTGC	246	0	23	0	66	0	464	0	121	0	200	0	188	0	1308
GGTGTCGTAGGGCCGAACCTCTTCCATGCCCAGGCCGCG	3	0	0	0	3	0	18	0	6	0	105	0	82	0	217
GGTGTCGTAGGGCCGAACCTCGTTCCATGCCCAGCCGTCG	1	0	0	0	5	0	16	0	17	0	108	0	112	0	259
GGTGTCGTAGGGCCGAACCATCGTTCCAGCCCGCTGCG	4	0	2	0	1	0	20	0	17	0	54	0	43	0	141
GGTGTCGGTAGGGCCGAACTCATCGTTCCAGGCCCCCGTGC	38	0	13	0	48	0	121	0	141	0	249	0	279	0	889
GTGATGTCGTAGGGCCGAACTCATCGTTCCAAGCCCCGTGC	12	0	3	0	6	0	76	0	36	0	102	0	103	0	338
GGTGTCGTAGGGCCGAACCTCTCCATGCCCGGCCGTCG	1	0	1	0	2	0	18	0	6	0	127	0	74	0	229
AGTGTTGTAGGGGCCCGAAACTCATCGTTCCAGGCCCCGTGC	98	0	26	0	29	0	62	0	20	0	46	0	31	0	312
GGTGTCGTAGGGCCGAAACTCATCGTTCCAGGCCCCGTAGC	348	0.0001	103	0.0001	119	0	265	0	72	0	105	0	111	0	1123
AGTGTGTAGGGCCGAAACTCATCGTTCCCAGGCCCCGTGC	51	0	41	0	32	0	99	0	67	0	155	0	142	0	587
GTGAGTGTAGGGCCGAACCTCATCCTGCCCAGGCCGCG	5	0	1	0	7	0	41	0	23	0	51	0	46	0	174
GGTGTCGTAGGGCCGAAACTCATCGTTGCCCAGGCCCCGTGC	32	0	14	0	14	0	47	0	33	0	87	0	109	0	336
GGTGTCGTAGGGCCGAACTCATCCCGTTCCAGGCCCCGTGC	152	0	51	0	52	0	146	0	59	0	156	0	119	0	735
GGTGTCGTAGGGCCGAACCATCATTCCTGCCCAGGCCGTCG	6	0	0	0	4	0	28	0	19	0	59	0	49	0	165
GTGAGTCGTAGGGCCGAACTCATCGTTCCAGCCCGTGC	9	0	2	0	8	0	46	0	42	0	80	0	86	0	273
AGTGTCTGGTACGGCGAACTCATCGTTCCAGGCCCCGTGC	135	0	16	0	32	0	122	0	52	0	26	0	38	0	421
GGGTGTCGTAGGCGAACTCATCGTTCCAGGCCCCGTGC	40	0	5	0	17	0	88	0	32	0	103	0	93	0	378
GAAGCGAAACAGGGCGCACCCCATCGTGCCAGCCCGTCTG	129	0	3	0	0	0	0	0	0	0	0	0	0	0	132
GTGAGTTGTAGGGCCGAACTCATCGTTCCCAGGCCCCCGTGC	8	0	4	0	5	0	45	0	31	0	61	0	102	0	256
AGTGTTGGTAGGGCCGAAACTCATCGTTCCAGGCCCCGTGC	184	0	58	0	63	0	130	0	52	0	61	0	51	0	599
GGGTGTCGTAAGGGCCGAACTCATCGTTCCAGGCCCCGTGC	153	0	55	0	103	0	362	0	299	0	526	0	699	0	2197
GGGTGTCGTAGGGCCGAAACTCATCGTTCCAGGCCCCGTG	27	0	7	0	15	0	47	0	41	0	65	0	69	0	271
TGCTGCCAATGTAGATGGACACCACTTTCCGTGGCTGTCCC	46	0	1	0	0	0	4	0	0	0	0	0	2	0	53
GGTGTCGGTAGGGCCGAACTCATCGTTCCCAGGCCCCGTCGC	40	0	15	0	26	0	43	0	44	0	58	0	45	0	271
GGTGTCGGTAGGCCGAACTCATCGTTCCAGGCCCGTGC	82	0	21	0	29	0	81	0	51	0	53	0	85	0	402
GTGAGTCGTAGGGCCGAACTCATCGTTCCAGGCCCCGTGC	1616	0.0003	263	0.0002	2384	0.0007	40221	0.0037	18628	0.0026	85942	0.0055	88465	0.0061	237519
AGTGTTGTAGGGGCCGAAACTCATCGTTCCAGGCCCCGTGC	374	0.0001	82	0.0001	114	0	243	0	81	0	70	0	97	0	1061
GGTGCGTAGGGCCGAAACTCATCGTTCCAGGCCCGTGC	21	0	3	0	11	0	42	0	33	0	68	0	52	0	230
GGTGTCGTAGGGCCGAACCATCATCCTGCCCAGGCCGTCG	2	0	0	0	2	0	12	0	22	0	82	0	46	0	166
GATGTGTGTAGGGCCGAACTCATCGTTCCAGGCCCGTGC	120	0	13	0	62	0	438	0	131	0	186	0	89	0	1039
AGATGTTGTAGGGCCGAACTCATCGTTCCAGGCCCCGTGC	3306	0.0006	399	0.0003	1180	0.0004	7794	0.0007	679	0.0001	707	0	313	0	14378
GGTGTCGTAGGGCCGAACCTCGATTCCATGCCCAGGCCTGCG	0	0	1	0	1	0	13	0	7	0	30	0	30	0	82
GGTGTCGTAGGGCCGAACCTCTCCGATGCCCAGCCGCG	0	0	2	0	2	0	18	0	2	0	78	0	49	0	151
GTGATGTGTAGGGCCGAACTCATCGTCCAGGCCCGTGC	4	0	0	0	1	0	28	0	14	0	33	0	27	0	107
GGTGTCGTAGGGCCGAACTCATCGTTCCCAGGCCCCGTCGC	32	0	17	0	35	0	142	0	172	0	324	0	378	0	1100
GGTGTCGGTAGGGACCGAACTCATCGTTCCCAGGCCCGTGC	2	0	0	0	2	0	6	0	26	0	37	0	27	0	100
GTGAGTGTAGGGCCGAACCTCATTCCTGCCCAGGCCGCG	10	0	1	0	4	0	56	0	9	0	53	0	63	0	196
TGAGTTGTAGGGCCCGAACTCATCGTTCCAGGCCCCCGTGC	30	0	5	0	31	0	172	0	60	0	114	0	215	0	627
GGTGTCGGTAGGGCCGAACTCATCGTTCCAGGCCCCGTCGC	31	0	19	0	38	0	122	0	122	0	270	0	289	0	891
GGTGTCGTAGGGCCGAACCTCGATTCCATGCCCAGCCTGCG	0	0	1	0	1	0	11	0	15	0	49	0	40	0	117
GGCGCAACAACAAGGTCATGTGTCATACATGATGCCCCCC	45	0	2	0	0	0	1	0	0	0	6	0	0	0	54
GGTGTCGTAAGGGCCGAATCATCGTTCCAGGCCCCGTGC	41	0	12	0	35	0	103	0	83	0	165	0	198	0	637
GTGAGTGTAGGGCCCGAACTCATCGTTCCAGGCCCCCGTGC	42	0	7	0	21	0	128	0	45	0	121	0	151	0	515
TGAGTTGTAGGGACCGAATCATCGTTCCAGGCCCCGTGC	51	0	13	0	22	0	72	0	44	0	19	0	72	0	293
TGAGTTGTAGGGGCCCGAACTCATCGTTCCAGGCCCCCGTGC	40	0	9	0	15	0	43	0	23	0	32	0	42	0	204
GGTGTCGTAGGGACCGAACTCATCGTTCCCAGGCCCGTGC	7	0	0	0	6	0	22	0	20	0	45	0	38	0	138
GAGTCGTGGTACGGCAACTCATCGTTCCAGGCCCCGTGC	49	0	9	0	14	0	65	0	53	0	35	0	10	0	235
GGTGTCGTAGGGCCGAACCTCTCTGCCCAGGCCCGTCG	0	0	0	0	1	0	10	0	1	0	45	0	15	0	72
GTGAGTGTAGGGCCAACTCATCGTTCCAGGCCCCCGTGC	4	0	2	0	10	0	61	0	12	0	66	0	81	0	236
GGTGTCGTAGGGCCGAACTCAATCGTTCCAGGCCCCGGTGC	40	0	12	0	34	0	72	0	49	0	87	0	88	0	382
GGTGTCGTAGGCCGAACTCATCGTTCCCAGGCCCCCGTGC	25	0	11	0	29	0	62	0	44	0	80	0	157	0	408
GGTGTCGGTAGGGCCGAAACTCATCGTTCCCAGGCCCCGTGC	66	0	18	0	29	0	49	0	48	0	46	0	59	0	315
GTGATGTCGGTAGGGCCGAACTCATCGTTCCAGGCCCGTGC	7	0	0	0	4	0	32	0	29	0	35	0	38	0	145
GGTGTCGTAGGGCCGAACTCAATCGTTCCAGGCCCGTGC	49	0	21	0	37	0	148	0	162	0	299	0	317	0	1033
GGTGTCGTAGGGCCGAACCTCATTCCGTGCCCGGCCGCG	1	0	2	0	9	0	27	0	45	0	115	0	137	0	336
GGTGTCGTAGGGCCGAACCTCGTTCCATGCCCGCCTGCG	2	0	1	0	3	0	14	0	23	0	51	0	43	0	137
GTGAGTGTAGGGCCGAACCTCGATTCCTGCCCAGGCCGCG	2	0	0	0	6	0	23	0	7	0	22	0	44	0	104
GGTGTCGTAGGGGCCGAAACTCATCGTTCCCAGGCCCCGTGC	21	0	9	0	17	0	28	0	40	0	69	0	75	0	259
GGTGTCGTAGGGCCGAACCTCGATTCCATGCCCGCCTGCG	0	0	0	0	2	0	6	0	12	0	22	0	34	0	76
GGTGTCGTAGGGCCGAACCTCATTCCGATGCCCGGCCGCG	1	0	0	0	1	0	13	0	9	0	31	0	50	0	105
AGTGTTGGTAGGGCCGAACTCATCCGTTCCAGGCCCCGTGC	104	0	42	0	44	0	82	0	27	0	30	0	40	0	369
GGTGTCGTAGGGCCGAACCTCTTCCTGCCCCAGGCCGCG	0	0	0	0	0	0	9	0	3	0	19	0	24	0	55
GGTGTCGTAGGGCCGAACTATCGTTCCAGGCCCCCGTGC	127	0	29	0	51	0	124	0	55	0	88	0	119	0	593
GGTGTCGGCTAGGGACCGAACTCATCGTTCCAGGCCCCGTGC	5	0	4	0	9	0	11	0	16	0	30	0	10	0	85
AGTGTCGTTAGGACGGCGAACTCATCGTTCCAGGCCCCGTGC	49	0	8	0	13	0	20	0	9	0	2	0	1	0	102
GAGTGCTAGGTACGGCGAACTCATCGTTCCAGGCCCCGTGC	32	0	3	0	6	0	62	0	32	0	22	0	13	0	170
CATTGCACAGGGCGCCCCATTGTCCACGATCTGCTGCCCC	26	0	0	0	2	0	7	0	0	0	0	0	0	0	35
GGTGTCGTAGGGCCGAACCTCATCGTTCCCAGGCCCCGTCGC	11	0	4	0	10	0	25	0	38	0	41	0	58	0	187
GGTGTTGTAGGGCCGGAACTCAATCGTTCCAGGCCCCGTGC	59	0	23	0	27	0	75	0	52	0	77	0	80	0	393
GGTGTCGTAGGGCCGAACTCATCCGTTGCCCAGGCCCGTGC	23	0	5	0	10	0	40	0	15	0	46	0	40	0	179
GTGAGTCGTAGGCCGAACTCATCGTTCCAGGCCCCGTGC	49	0	6	0	42	0	648	0.0001	246	0	1131	0.0001	1200	0.0001	3322
GGTGTCGTAGGGCCGAACCTCATCGTGCCCAGGCCGTCG	2	0	1	0	2	0	22	0	17	0	160	0	84	0	288
AGTGTTGTAGGGCCCCCGAACTCATCGTTCCAGGCCCCGTGC	23	0	4	0	16	0	44	0	10	0	6	0	15	0	118
AGTGTCGTTAGGCGGCAACTCATCGTTCCAGGCCCCGTGC	44	0	13	0	7	0	26	0	5	0	2	0	1	0	98
GGTGTCGTAGGGGCCGAACTCATCGTTCCCAGGCCCCCGTGC	21	0	6	0	21	0	47	0	49	0	55	0	93	0	292
GGTGTCGTAGGGCCGAACCATCATTCCGTGCCCAGGCCGTCG	2	0	0	0	1	0	9	0	7	0	40	0	32	0	91
GAAGCGAAAACAGGGCGCACCCATCGTGCAGCCCGTCTG	57	0	1	0	0	0	0	0	0	0	0	0	0	0	58
TGAGTTTGTAGGGCCCGAACTCATCGTTCCAGGCCCCGTGC	69	0	13	0	28	0	106	0	36	0	40	0	59	0	351
GAAGCGAAACAGGGCGCACCCACGTGCCAGCCCGTCTG	72	0	4	0	0	0	0	0	0	0	0	0	0	0	76
GGTGTCGTAGGGCCGAACTCATCGTTCCAGGCCCCGTTTTGC	44	0	11	0	23	0	45	0	19	0	36	0	49	0	227
AGTGTTGTAGGGCCGAACTCCCATCGTTCCAGGCCCCGTGC	49	0	10	0	22	0	105	0	28	0	39	0	69	0	322
GGTGTCGTAGGGCCGAACCTCGATCCTGCCCAGGCCTGTCG	1	0	0	0	0	0	7	0	32	0	42	0	27	0	109
GGTGTCGTAGGGCCGAACCTCATCCTGCCCAGGCCCGCG	1	0	0	0	1	0	17	0	38	0	115	0	66	0	238
GGTGTCGTAGGGCCGAACTTTTCATCGTTCCAGGCCCCGTGC	40	0	7	0	18	0	46	0	22	0	48	0	47	0	228
GGGTGTCGTAGGGCCGAACTCACGTTCCAGGCCCCGTGC	25	0	5	0	31	0	92	0	96	0	153	0	188	0	590
GAGAGTTGTAGGGCCGAACTCATCGTTCCAGGCCCCGTGC	373	0.0001	118	0.0001	184	0.0001	804	0.0001	249	0	318	0	375	0	2421
GTGATGTGTAGGGCCGAACCTCATCGTCCCAGGCCCGTGC	1	0	0	0	1	0	23	0	10	0	24	0	29	0	88
AGTGTTGTAAAAGGGCCGAACTCATCGTTCCAGGCCCCGTGC	13	0	4	0	8	0	25	0	6	0	7	0	10	0	73
GGTGTCGTAGGGCCGAACCTCATCCGATGCCCAGGCCTGTCG	3	0	1	0	5	0	27	0	50	0	164	0	134	0	384
GGTGTTGTAGGGCCGAACTCATCGTCCAGCCCGCTGCG	7	0	7	0	6	0	18	0	8	0	12	0	6	0	64
TGAGTTGTAGGGCCGAACTCATCGTTCCAGGGGGCCCCGTGC	13	0	7	0	4	0	22	0	9	0	8	0	13	0	76
TGAGTTGTAGGGCCGAACTCATCGTTCCAGGCCCCGTGTC	190	0	23	0	74	0	541	0.0001	152	0	281	0	328	0	1589
GGTGTCGTAGGGCCGAACTCGATCGTTCCAGGCCCCGTGC	680	0.0001	132	0.0001	263	0.0001	913	0.0001	568	0.0001	1165	0.0001	1388	0.0001	5109
TCATACTGAATCTCCGCTGGCCACGGTCCTCCTGGCCCCC	26	0	1	0	2	0	0	0	0	0	0	0	0	0	29
GGTGTCGTAGGGCCGAACTCATCCCCGTTCCAGGCCCCGTGC	19	0	5	0	26	0	59	0	28	0	58	0	64	0	259
GGTGTCGTAGGGCCGAACCTCGATCCTGCCCAGCCTGCG	2	0	0	0	2	0	3	0	31	0	43	0	44	0	125
GTGAGTGTAGGGCCGAACCTCATTCCTGCCCGGCCGCG	7	0	1	0	5	0	41	0	12	0	49	0	67	0	182
TGAGTTGTAGGCCGAATCATCGTTCCCAGGCCCCGTGC	27	0	10	0	17	0	38	0	15	0	21	0	43	0	171
GGTGCGTAGGGCCGAACTCATCGTTCCCAGGCCCCCGTGC	22	0	9	0	14	0	65	0	39	0	96	0	93	0	338
GTGAGTGTAGGGCCGAACTCAATCGTTCCAGGCCCCGTGC	33	0	9	0	24	0	113	0	67	0	162	0	194	0	602
GGTGTCGTAGGCCGAACTCAATCGTTCCAGGCCCGTGC	8	0	1	0	7	0	16	0	19	0	40	0	54	0	145
TGAGTTGTAGGGCCGAACTCACGTTCCAGGCCCCGTGC	47	0	4	0	42	0	196	0	82	0	184	0	201	0	756
GATGTGTCGGTAGGGCCGAACTCATCGTTCCAGGCCCCGTGC	47	0	4	0	39	0	169	0	114	0	178	0	53	0	604
AGTGTTGTAGGGCCAACTCATCGTTCCAGGCCCCGTGC	2700	0.0005	606	0.0004	911	0.0003	1604	0.0001	239	0	178	0	124	0	6362
GGTGCGTAGGGCCGAACTCATCGGTTCCAGGCCCCGTGC	44	0	18	0	36	0	182	0	134	0	263	0	328	0	1005
GGTGTCGTAGGGCCGAAACTCATCGTTCCAGCCCGTGC	10	0	5	0	3	0	19	0	14	0	45	0	42	0	138
GGTGTCGTAGGGCCGAACCATCTCCTGCCCAGGCCGCG	3	0	0	0	1	0	44	0	16	0	152	0	104	0	320
GGTGTCGTAGGGCCGAACCTCTCCGATGCCCAGGCCTGCG	0	0	0	0	0	0	3	0	6	0	40	0	26	0	75
AGATGTGTGGCGGCAACTCATCGTTCCAGGCCCCGTGC	10	0	1	0	2	0	29	0	1	0	6	0	8	0	57
GAGTCGTAGGTACGGCAACTCATCGTTCCAGGCCCCGTGC	26	0	6	0	7	0	36	0	24	0	14	0	5	0	118
GGTGTCGTAAGGGCCGGAACTCCATCGTTCCAGGCCCCGTGC	9	0	1	0	5	0	8	0	15	0	25	0	20	0	83
AGTGTTGTAGGGCCGAACTCATCGTGCCAGCCCCGTCTG	232	0	19	0	4	0	3	0	1	0	6	0	8	0	273
AGTGTCGTTAGGACGGCAACTCATCGTTCCAGGCCCCGTGC	38	0	4	0	1	0	6	0	2	0	3	0	2	0	56
AGTGTTGTAGGGCCGAAAGCTCATCGTTGCCAGGCCCCGTGC	25	0	38	0	5	0	17	0	16	0	3	0	11	0	115
GGTGCGTAGGGCCGAACTCATCGTTGCCCAGGCCCCGTGC	24	0	12	0	16	0	52	0	23	0	52	0	54	0	233
GTGACTAGGTCGGCGAACTCATCGTTCCAGGCCCCGTGC	24	0	0	0	4	0	38	0	12	0	25	0	16	0	119
GGGTGTTGTAGGGCCGAATCATCGTTCCAGGCCCCTGC	19	0	8	0	16	0	68	0	41	0	57	0	85	0	294
GGTGTTGTAGGGCCGGAACTCAATCGTTCCAGGCCCCGCTGC	2	0	2	0	2	0	10	0	10	0	14	0	6	0	46
GAGTGTGTAGGGCCGAACTCATTCGTTCCAGGCCCCCGTGC	26	0	3	0	8	0	32	0	11	0	20	0	27	0	127
GGGTGTCGTAGGCCGAACTCATCGTCCAGGCCCCGTGC	10	0	1	0	5	0	38	0	15	0	62	0	73	0	204
AGATGTTGTAGGCCGAATCATCGTTCCAGGCCCCGTGC	7	0	1	0	7	0	33	0	4	0	3	0	9	0	64
AGTGTTGTAGGGCCGAACCTCATCGTTCCCAGGCCCGTCGC	28	0	3	0	13	0	20	0	4	0	10	0	14	0	92
GTGAGTGTAAGGGCCGAACTCATCGTTCCAGGCCCGTGC	19	0	6	0	12	0	57	0	16	0	39	0	32	0	181
GGTGTCGTAGGGCCGAACTCATCGGGGTTCCAGGCCCCGTGC	25	0	5	0	12	0	32	0	22	0	31	0	28	0	155
GAGTCGTGGACGGCAACTCATCGTTCCAGGCCCCGTGC	69	0	8	0	28	0	125	0	48	0	95	0	44	0	417
GGTGTCGTAGGGCCGAACTCATCGTTCCAGGCCCCGGGTGC	23	0	14	0	44	0	151	0	171	0	337	0	322	0	1062
GGTGTCGTAGGGCCGAATCATCGTTGCCCAGGCCCCGTGC	3	0	2	0	2	0	18	0	7	0	21	0	41	0	94
AGTGTGTAGGGCCGAAAGCTCATCGTTCCAGGCCCCGTGC	37	0	5	0	21	0	48	0	14	0	19	0	14	0	158
GGTGTCGTAGGGCCGAACCATCTCCTGCCCAGGCCGTCG	0	0	0	0	2	0	16	0	3	0	39	0	29	0	89
GGTGTCGTAGGGCCGAACTCATCGTTGCCAGCCCGTGC	21	0	15	0	9	0	17	0	19	0	18	0	23	0	122
GGTGTCGTAGGGCCGAACTCATCGTCCAGGCCCCGTAGC	19	0	8	0	31	0	130	0	147	0	269	0	259	0	863
AGTGTCTAGGCGGCGAACTCATCGTTCCAGGCCCCGTGC	24	0	2	0	10	0	39	0	10	0	14	0	12	0	111
TGAGTTGTAGGGCCGAACCTCTTCCATGCCCGGCCGCG	10	0	1	0	6	0	33	0	4	0	11	0	11	0	76
TGAGTTGTAGGGCCGAAACTCATCGTTCCAGGCCCCCGTGC	134	0	32	0	94	0	324	0	93	0	137	0	323	0	1137
GTGATGTGTAGGGCCGAACCTCATCCGTGCCCGGCCGCG	2	0	0	0	2	0	13	0	9	0	18	0	31	0	75
AGTGTTGTAAGGGCCGAACTCATCGTCCAGGCCCCGTGC	79	0	11	0	29	0	72	0	17	0	20	0	43	0	271
GGTGTCGTAGGGCCGAAACTCATCGTTTCCAGGCCCCCGTGC	9	0	4	0	7	0	20	0	27	0	48	0	69	0	184
GGTGTCGTAGGGCCGAACTCATCGTTTCCCAGGCCCCCGTGC	38	0	12	0	29	0	40	0	25	0	29	0	49	0	222
GGTGGGGTCGTAGGCCGAACTCATCGTTCCAGGCCCCGTGC	1	0	2	0	1	0	9	0	7	0	18	0	16	0	54
TGAGTTGTAGGGCCGAACCCATCGTTCCAGGCCCCGTGC	3286	0.0006	831	0.0006	1726	0.0005	7374	0.0007	1811	0.0003	2583	0.0002	4684	0.0003	22295
GGTGGTCGTAGGGCCGAACTCATCGTTCCAGGCCCGTGC	34	0	16	0	50	0	209	0	232	0	376	0	400	0	1317
GGTGGTCGTAGGGCCGAAACTCATCGTTCCAGGCCCCGTGC	34	0	12	0	15	0	139	0	138	0	317	0	297	0	952
TGAGTTGTAGGCCGAACTCATCGTTGCCAGGCCCGTGC	15	0	10	0	19	0	41	0	13	0	22	0	34	0	154
GGTGTCGGTAGGGCCGAAACTCATCGTTCCAGGCCCCGTGC	14	0	11	0	23	0	85	0	164	0	321	0	270	0	888
GTGTCGTAGGGACCGAACTCATCGTTCCAGGCCCCGTGC	24	0	4	0	14	0	69	0	28	0	73	0	66	0	278
GTGATGTGTAGGGCCGAATCATCGTTCCAGGCCCCGTGC	5	0	0	0	2	0	94	0	42	0	182	0	171	0	496
GTGATGTGTAGGCGAACTCATCGTTCCAGGCCCCGTGC	2	0	0	0	2	0	19	0	5	0	14	0	19	0	61
GGTGTCGTAGGGCCGAACCATCGTTCCTGCCCAGGCCGCG	2	0	1	0	0	0	16	0	9	0	71	0	59	0	158
GGTGTCGGTAGGCCGAACTCATCGTTCCCAGGCCCCGTGC	28	0	7	0	26	0	48	0	51	0	80	0	93	0	333
GGTGTCGTAGGGCCGAATCATCGTTCCCAGGCCCCGTCGC	7	0	3	0	2	0	19	0	5	0	28	0	26	0	90
GTGTCGTAGGACGGCAACTCATCGTTCCAGGCCCCGTGC	24	0	4	0	10	0	70	0	9	0	40	0	11	0	168
GGTGATGTCGTAGGGCCGAACTCATCGTTCCAGGCCCCGTGC	575	0.0001	122	0.0001	588	0.0002	4055	0.0004	2056	0.0003	3589	0.0002	3734	0.0003	14719
GTGATGTCGTAGGGCCGAAACTCATCGTTCCAGGCCCGTGC	4	0	1	0	2	0	26	0	19	0	28	0	36	0	116
AGTGTGTAGGCCGAACTCATCGTTCCAGGCCCCGTCGC	17	0	6	0	12	0	43	0	9	0	37	0	35	0	159
GGTGTCGTAGGGCCGAACCTCATCCTGCCCAGGCCGTCG	8	0	1	0	5	0	20	0	58	0	185	0	102	0	379
GTGAGTTGTAGGGCCCGAAACTCATCGTTCCAGGCCCCGTGC	2	0	1	0	3	0	26	0	7	0	29	0	44	0	112
GTGAGTGTAGGGGCCCGAACTCATCGTTCCAGGCCCCCGTGC	5	0	0	0	6	0	22	0	5	0	16	0	28	0	82
GGTGTCGGTAGGGACCGAACTCATCGTTCCAGGCCCCGTGC	18	0	5	0	16	0	54	0	104	0	151	0	158	0	506
GGGTGTCGTAGGGCCAACTCATCGTTCCAGGCCCCGTGC	22	0	12	0	22	0	110	0	99	0	189	0	229	0	683
GGTGTCGTAGGGCCGAACCTCTCCGATGCCCAGGCCGTCG	0	0	0	0	1	0	4	0	3	0	47	0	41	0	96
AGTGTGTAGGTACGGCAACTCATCGTTCCAGGCCCCGTGC	98	0	12	0	33	0	99	0	30	0	29	0	7	0	308
GGTGTCGTAGGGCCGAATCATCGTTCCAGGCCCGTCGC	4	0	1	0	9	0	23	0	23	0	34	0	32	0	126
GATGTGTGTAGGGCCAACTCATCGTTCCAGGCCCGTGC	7	0	1	0	4	0	29	0	8	0	23	0	18	0	90
GGTGTCGGTAGGGCCGAACCCATCGTTCCAGCCCCGTGC	0	0	0	0	0	0	1	0	56	0	3	0	4	0	64
GGTGTCGTAGGGCCGAACCATCGATTCCTGCCCAGGCCTGCG	2	0	0	0	2	0	5	0	3	0	22	0	16	0	50
CGAGATGAAAGGCGTCGTCACCACCAATAATCCCAGCCCC	18	0	0	0	0	0	7	0	0	0	0	0	1	0	26
GTGATGTGTAGGGCCGAACCTCATCCTGCCCGGCCGCG	3	0	0	0	0	0	16	0	16	0	22	0	22	0	79
GTGAGTGTAGGGCCGAACTCATCTTCCAGGCCCCCGTGC	5	0	2	0	1	0	31	0	3	0	18	0	25	0	85
TGAGTTGTAGGGCCGAATCATCGTTCCCAGGCCCCGTGC	38	0	11	0	25	0	95	0	65	0	52	0	135	0	421
GGTGTCGGTAGGGCCGAAACTCATCGTTCCAGGCCCGTGC	15	0	5	0	9	0	24	0	27	0	48	0	40	0	168
GTGTGTGTAGGGCCAACTCATCGTTCCCAGGCCCGTGC	4	0	3	0	5	0	32	0	4	0	31	0	16	0	95
AGTGTGTAAGGGCCGAAACTCATCGTTCCAGGCCCCGTGC	28	0	5	0	12	0	26	0	17	0	41	0	41	0	170
GGTGTCGTAGGGCCGAACCTCATCCTGCCCGGCCGTCG	2	0	0	0	2	0	10	0	36	0	61	0	57	0	168
GTGATCGTGGCGGCAACTCATCGTTCCAGGCCCCGTGC	4	0	0	0	0	0	13	0	7	0	12	0	13	0	49
GGTGTCGTAGGCGAACTCATCGTTCCCAGGCCCCGTGC	19	0	8	0	10	0	18	0	17	0	27	0	40	0	139
AGTGTTGTAGGGCCAACTCATCGTTCCCAGGCCCCGTGC	44	0	20	0	20	0	69	0	18	0	26	0	26	0	223
GGTGCGTAGGGCCGAAACTCATCGTCCAGGCCCCGTGC	26	0	9	0	11	0	46	0	14	0	40	0	25	0	171
GGTGTCGTAGGGCCGAACCTCATCCGTGCCCGGCCGTCG	1	0	0	0	6	0	10	0	45	0	75	0	64	0	201
GGTGTCGTAGGCCGAACTCATCGTTCCAGGCCCCGTAGC	19	0	12	0	29	0	138	0	101	0	150	0	228	0	677
GGTGCGTAGGGCCGAAACTCATCGTTCCAGGCCCCGGTGC	16	0	8	0	12	0	40	0	30	0	58	0	62	0	226
GGTGTCGTAGGGCCGAACCTCATTCCGATGCCCGCCGCG	0	0	0	0	0	0	6	0	1	0	10	0	8	0	25
GGTGTCGTAGGGCCGAACCATCATTCCTGCCCGCCGCG	3	0	0	0	2	0	13	0	16	0	51	0	34	0	119
GGTGCGTAGGGCCGAATCATCGTTGCCAGGCCCCGTGC	7	0	4	0	9	0	40	0	8	0	26	0	36	0	130
GGGTGTCGTAGGGCCAATCATCGTTCCAGGCCCCGTGC	6	0	1	0	9	0	30	0	15	0	45	0	51	0	157
GGTGTCGTAGGGCCGAACTCATCCGTTGCCAGGCCCGTGC	3	0	1	0	6	0	17	0	18	0	31	0	33	0	109
GGTGTCGTAGGGCCGAACCCATCGTTCCAGGCCCCGCTGC	29	0	24	0	96	0	312	0	136	0	642	0	731	0.0001	1970
GGTGTCAAGTAGGGCCGAACTCATCGTTCCAGGCCCCGTGC	29	0	4	0	24	0	78	0	33	0	48	0	81	0	297
GGTGCGTAGGGCCGAACTATCGTTCCAGGCCCCCGTGC	8	0	2	0	7	0	19	0	17	0	43	0	45	0	141
GGTGTCGTAGGGCCGAACCCCATCGTTCCCAGGCCCCCGTGC	7	0	5	0	8	0	24	0	27	0	34	0	76	0	181
GGTGTCGTAGGGCCGAACCATCGTCCATGCCCGCCTGCG	0	0	0	0	1	0	10	0	7	0	36	0	23	0	77
AGTGTTGGTAGGGCCGAACTCATCCGTTGCCCAGGCCCGTGC	7	0	2	0	7	0	9	0	6	0	12	0	13	0	56
GATGTGTGTAGGGCCGAAACTCATCGTTCCAGGCCCCGTGC	33	0	5	0	24	0	171	0	31	0	49	0	17	0	330
GTGTGTGTAGGGCCGAACTCATCCGTTGCCCAGGCCCCGTGC	4	0	0	0	4	0	16	0	2	0	3	0	15	0	44
GTGAGTGTAGGGCCGAACTCATCGGGTTCCAGGCCCCGTGC	4	0	2	0	3	0	30	0	11	0	44	0	34	0	128
AGTGTTGGGTAGGGCCGAACTCATCGTTCCAGGCCCCGTGC	112	0	33	0	47	0	116	0	81	0	100	0	66	0	555
TGAGTTGTAGGGCCGAACTCATCGTTTCCAGGCCCCGTGC	125	0	35	0	108	0	431	0	158	0	213	0	444	0	1514
GGTGTCGTAGGCCGAAGCTCATCGTTGCCAGGCCCGTGC	1	0	26	0	2	0	1	0	9	0	15	0	8	0	62
GGTGTCGTAGGCCGAAACTCATCGTTCCAGGCCCGTGC	50	0	14	0	16	0	56	0	32	0	43	0	37	0	248
GGTGTCGTAGGGCCGAAACTCATCGTTCCAGGGCCCCCGTGC	14	0	6	0	11	0	24	0	24	0	49	0	74	0	202
GTGAGTGTAGGGCCGAACCTCATCCGTTGCCCAGGCCCGTGC	3	0	1	0	2	0	13	0	6	0	8	0	13	0	46
GGTGTCGTAGGGCGAACTCATCGTTGCCAGGCCCGTGC	4	0	4	0	9	0	22	0	22	0	52	0	61	0	174
TGAGTTGTAGGGCCGAACTCATCGTTCCAGGCCCCCGTGC	4781	0.0008	1324	0.0009	5140	0.0015	17707	0.0016	4446	0.0006	4806	0.0003	11967	0.0008	50171
GGTGCGTAGGCCGAACTCATCGTTCCCAGGCCCCGTGC	33	0	9	0	16	0	64	0	48	0	68	0	89	0	327
GTGAGTGTAGGGGCCCGAACTCATCGTTCCAGGCCCCGTGC	25	0	7	0	13	0	82	0	16	0	60	0	48	0	251
TGAGTCTGGACGGCAACTCATCGTTCCAGGCCCCGTGC	48	0	4	0	14	0	73	0	23	0	37	0	30	0	229
AGTGTGTAGGGCCGAACCCATCGTTCCAGGCCCCGTGC	170	0	39	0	51	0	109	0	10	0	15	0	8	0	402
GGTGTCGTAGGCCGAATCATCGTTCCAGGCCCCCGTGC	9	0	3	0	7	0	28	0	25	0	44	0	88	0	204
GGTGTCGTAGGGCCGAACTCATCGTTCCAGGCCCCGTGGGGC	13	0	4	0	20	0	51	0	28	0	94	0	89	0	299
GTGATGTGTAGGCCGAACTCATCGTCCAGGCCCCGTGC	1	0	0	0	1	0	3	0	4	0	19	0	14	0	42
GGTGTCGTAGGGCCGAACCTCGATTCCTGCCCAGGCCTGCG	1	0	1	0	2	0	6	0	15	0	39	0	59	0	123
GGTGTCGTAGGGCCGAACCTCATTCCGTCCCAGGCCCGTCGC	0	0	0	0	1	0	5	0	9	0	23	0	16	0	54
GAGTGCTGGTACGGCAACTCATCGTTCCAGGCCCCGTGC	61	0	11	0	14	0	129	0	37	0	64	0	16	0	332
AGTGTCTGTAGGCGAACTCATCGTTCCAGGCCCCGTGC	56	0	3	0	15	0	25	0	7	0	10	0	4	0	120
AGTGTTGTAGGCCGAACTCATCGTTCCAGGCCCGGTGC	425	0.0001	73	0.0001	58	0	115	0	27	0	26	0	29	0	753
AGTGTGTAGGGCCGAACTCATCGTTCCAGGCCCCAGTGC	123	0	24	0	45	0	116	0	46	0	22	0	30	0	406
GGTGTCGTAGGGCCGAACCTCATCTGCCCAGGCCCGTCG	1	0	0	0	2	0	12	0	6	0	75	0	40	0	136
GGTGTCGTAGGGCCGAACCTCATCCGATGCCCGGCCGTCG	0	0	0	0	0	0	3	0	11	0	25	0	18	0	57
GTGATGTGTAGGGCCGAACCTCATTCCGTGCCCAGGCCGCG	2	0	1	0	0	0	9	0	3	0	20	0	16	0	51
TGAGTTGTAGGGCCGAACCCATCGTTCCAGCCCCGCTGC	12	0	1	0	10	0	24	0	10	0	12	0	25	0	94
TGAGTTGTAGGGACCGAATCATCGTTCCCAGGCCCCGTGC	11	0	2	0	4	0	10	0	4	0	6	0	10	0	47
GTGATGTGTAGGGCCGAACCTCATCCGTGCCCAGGCCGCG	2	0	3	0	2	0	16	0	13	0	24	0	33	0	93
AGTGTTGTAGGGCCAAACTCATCGTTCCAGGCCCCCGTGC	42	0	18	0	18	0	38	0	12	0	18	0	29	0	175
GGTGTCGGTAGGGCCGAACTCATCGTTCCAGCCCGTGC	7	0	2	0	2	0	20	0	18	0	37	0	27	0	113
GGTGTCGTAGGGCCGAACCATCTTCCTGCCCAGGCCGCG	1	0	0	0	2	0	53	0	9	0	126	0	105	0	296
GTGTCGTAGGGCCGAACTCATCGTTCCAGGCCCGTGCC	4	0	3	0	6	0	30	0	24	0	42	0	39	0	148
GGGTGTTGTAGGGCCGAACTCATCGTTCCAGCCCCGTGC	74	0	20	0	51	0	111	0	85	0	96	0	78	0	515
AGTGTTGTAGGGCCGAACTCATCGTTCCAGGCCCCGGGGTGC	18	0	5	0	8	0	31	0	9	0	6	0	11	0	88
GTGATGTGTAGGGCCGAATCATCGTTCCAGGCCCCCGTGC	0	0	0	0	2	0	11	0	4	0	9	0	18	0	44
GGTGTCGTAGGGCCGAACCCATCGTTCCGAGGCCCCGTGC	8	0	4	0	14	0	36	0	22	0	79	0	100	0	263
GGTGTCGTAGGGCCAAACTCATCGTCCAGGCCCCGTGC	10	0	6	0	4	0	12	0	14	0	44	0	44	0	134
GTGAGTGTAGGGCCGAACCTCGATTCCTGCCCAGCCGCG	0	0	0	0	0	0	11	0	5	0	15	0	21	0	52
GGTGTCGTAGGGCCGAATCATCGTTCCCAGGCCCCCGTGC	4	0	4	0	4	0	16	0	18	0	20	0	40	0	106
GGTGTCGTAGGGCCGAACCATCGTTCCTGCCCAGCCGCG	1	0	2	0	3	0	12	0	4	0	62	0	55	0	139
GATGTGTGTAGGGCCGAACCTCATCGTTCCCAGGCCCGTGC	14	0	3	0	9	0	41	0	10	0	12	0	11	0	100
GGTGTCGTAGGGCCGAACCATCATCCTGCCCAGGCCTGTCG	1	0	1	0	0	0	4	0	6	0	28	0	21	0	61
AGTGTTGTAGGGCCGAACTCACCGTTCCAGGCCCCGTGC	572	0.0001	98	0.0001	117	0	289	0	61	0	44	0	31	0	1212
GGTGTCGGTAGGGCCGAACTCATCGTTGCCCAGGCCCCGTGC	16	0	5	0	11	0	20	0	13	0	30	0	24	0	119
AGTGTTGTAGGGCCAACTCAATCGTTCCAGGCCCCGTGC	19	0	6	0	8	0	18	0	8	0	8	0	15	0	82
GGTGTCGTAGGGCCGAACCTCATTCCTGCCCAGGCCCGCG	1	0	0	0	1	0	8	0	6	0	63	0	47	0	126
GGTGTCGTAGGGCCGAAACTCATCCGTTGCCAGGCCCCGTGC	7	0	13	0	7	0	22	0	36	0	53	0	56	0	194
GAGTGTGTAGGGCCGAACTCATCGTCCAGGCCCCGTGC	43	0	10	0	22	0	183	0	46	0	99	0	45	0	448
TGAGTTGTAGGGCCGAACTCATAGTTCCAGGCCCCGTGC	29	0	4	0	10	0	107	0	24	0	25	0	85	0	284
GTGAGTGTAGGGCCGAAACTCATCGTTCCAGGCCCGTGC	3	0	1	0	1	0	37	0	13	0	32	0	35	0	122
GGTGTCGTAGGGCCGAACCTCATTCCGTGCCCAGGCCGCG	3	0	0	0	3	0	25	0	19	0	112	0	124	0	286
GGTGTCGTAGGGCCGAACCTCATCGTTGCCCAGGCCCGTGC	18	0	6	0	7	0	27	0	7	0	23	0	13	0	101
GGTGTCGTAGGGCCGAACCTCATCCGATGCCCGGCCTGCG	1	0	0	0	2	0	1	0	15	0	24	0	23	0	66
GGTGTTGTAGGGCCGAACTCATCGTCCAGCCCGCCTGCG	6	0	3	0	2	0	14	0	11	0	5	0	8	0	49
GGTGTTGTAGGCCGAACTCATCGTTCCAGGCCCCGCTGC	28	0	13	0	33	0	97	0	12	0	29	0	21	0	233
AGTGTTGGTAAGGGCCGAAACTCATCGTTCCAGGCCCCGTGC	30	0	9	0	12	0	12	0	8	0	18	0	15	0	104
ATGAGTTGTAGGGCCGAACTCATCGTTCCAGGCCCCGTGC	6947	0.0012	761	0.0005	2446	0.0007	17450	0.0016	2705	0.0004	3050	0.0002	2578	0.0002	35937
GGGTGCGTAGGGCCGAATCATCGTTCCAGGCCCCGTGC	3	0	1	0	9	0	23	0	9	0	24	0	37	0	106
GGGTGTCGTAGGGCCGAACTCATCTCCAGGCCCCGTGC	4	0	0	0	6	0	27	0	20	0	36	0	47	0	140
CGAGATGAAAGGCGTCGTCACCACAATAATCCCAGCCCC	6	0	0	0	0	0	8	0	0	0	0	0	0	0	14
AGTGTTGTAGGGCCGAACTCATCGTTCCAGCCCCGTGC	1202	0.0002	271	0.0002	349	0.0001	667	0.0001	88	0	75	0	77	0	2729
GGTGTCGTAGGGCCGAACCATCATCCTGCCCGGCCGTCG	1	0	0	0	3	0	5	0	10	0	34	0	26	0	79
GGTGTGCGTAGGGCCGAACTCATCGTTCCAGGCCCGTGC	33	0	19	0	41	0	182	0	138	0	268	0	223	0	904
GAGTGCTGGACGGCAACTCATCGTTCCAGGCCCCGTGC	30	0	5	0	11	0	108	0	11	0	19	0	3	0	187
GGTGTCGTAGGGCCGAACCTCATTCCGATGCCCAGGCCGCG	7	0	0	0	6	0	16	0	6	0	35	0	28	0	98
GGTGTCGGCTAGGGCCGAACTCATCGTTCCCAGGCCCCGTGC	11	0	2	0	7	0	24	0	9	0	18	0	13	0	84
GGTGTCGTAGGGCCGAACTCAATCGTTCCAGGCCCCCGTGC	20	0	13	0	30	0	104	0	108	0	158	0	251	0	684
AGTGTGTAGGACGGCAACTCATCGTTCCAGGCCCGTGC	20	0	3	0	7	0	8	0	3	0	0	0	1	0	42
GTGATCGTAGGTCGGCAACTCATCGTTCCAGGCCCCGTGC	2	0	0	0	0	0	8	0	6	0	11	0	9	0	36
GGTGTCGTAGGGCCGAACCATCATCCGTGCCCAGGCCCGTCG	0	0	0	0	2	0	8	0	7	0	42	0	30	0	89
GGGTGTCGTAGGGGCCGAACTCATCGTTCCAGGCCCCCGTGC	76	0	41	0	136	0	458	0	428	0.0001	691	0	765	0.0001	2595
TGAGTGTAGGCCGGAACTCATCGTTCCAGGCCCCGTGC	29	0	12	0	29	0	111	0	29	0	59	0	104	0	373
GGTGCGTAGGGCCGAAACTATCGTTCCAGGCCCCGTGC	16	0	0	0	4	0	26	0	12	0	33	0	27	0	118
GTGAGTGTAGGGCCAACTCAATCGTTCCAGGCCCCGTGC	2	0	0	0	3	0	15	0	7	0	20	0	25	0	72
GGTGTCGTAGGCCGAATCATCGTTCCAGGCCCCGTCGC	6	0	0	0	3	0	13	0	9	0	20	0	25	0	76
TGAGTTGTAGGGCCGAATCATCGTTCCCAGGCCCCCGTGC	8	0	1	0	9	0	13	0	11	0	8	0	19	0	69
AGTGTTCGTAGGGCCGAACTCATCGTTCCAGGCCCCGTGC	4619	0.0008	772	0.0006	1719	0.0005	3891	0.0004	581	0.0001	202	0	119	0	11903
GAGTGTGTAGGGCCCGAACTCATCGTTCCAGGCCCCGTGC	282	0	59	0	143	0	948	0.0001	202	0	495	0	307	0	2436
GGTGTTGTAGGGCCGGAACTCATCGTTCCAGCCCCGTGC	21	0	7	0	17	0	33	0	30	0	34	0	34	0	176
AGTGTTGTAGGGCCGAACTCATCGTTCCAGGCCCCCGTGCC	582	0.0001	136	0.0001	227	0.0001	305	0	37	0	34	0	34	0	1355
GGTGCGTAGGGCGAACTCATCGTTCCAGGCCCCGGTGC	7	0	1	0	17	0	28	0	24	0	50	0	65	0	192
GGTGTCGTAGGGCCGAACCATCGTTCCATGCCCAGCCGCG	2	0	1	0	3	0	13	0	2	0	37	0	37	0	95
GATGTGCTAGGTACGGCAACTCATCGTTCCAGGCCCCGTGC	9	0	2	0	2	0	13	0	15	0	7	0	3	0	51
GTGAGTGTAGGGGCCCGAAACTCATCGTTCCAGGCCCCGTGC	5	0	3	0	0	0	12	0	5	0	13	0	12	0	50
CGAGCGTAGAATGTCTTCCCACTAGACGTCGTTCGGCCCC	15	0	1	0	0	0	0	0	0	0	1	0	0	0	17
GGTGTCGTAGGGCCGAACCATCGTTCCAGGCCCCGCTGC	2	0	2	0	7	0	29	0	9	0	66	0	91	0	206
GGTGCGTAGGGCCGAACTCATCGTCCAGGCCCCGTGCC	12	0	1	0	12	0	18	0	16	0	45	0	33	0	137
GGTGTCGTAGGGCCCCCCGAATCATCGTTCCAGGCCCCGTGC	2	0	0	0	1	0	2	0	0	0	4	0	6	0	15
GGTGTCGTAGGCCGAAACTCATCGTTCCAAGGCCCCGTGC	9	0	10	0	8	0	15	0	19	0	32	0	37	0	130
TGAGTTGTAAAGGGCCGAACTCATCGTTCCAGGCCCCGTGC	20	0	8	0	8	0	59	0	7	0	27	0	41	0	170
GTGAGTCGTAGGGCCAACTCATCTTCCAGGCCCCGTGC	2	0	1	0	0	0	11	0	12	0	23	0	29	0	78
GATGTGTCGTAGGGCCGAACCTCATCCGTGCCCAGCCGCG	7	0	0	0	0	0	18	0	9	0	9	0	6	0	49
GGTGTCGTAGGGCCGAACTCATCCGTGCCCAGGCCCGTCG	5	0	0	0	3	0	14	0	6	0	36	0	24	0	88
AGTGTTGTAGGGCCGAACTCATCGTCCAGGCCCCGTAGC	21	0	7	0	14	0	54	0	22	0	21	0	30	0	169
GGTGCGTAAGGGCCGAACTCATCGTCCAGGCCCCGTGC	5	0	5	0	2	0	17	0	3	0	31	0	11	0	74
GATGTATTGGTACGGCGAACTCATCGTTCCAGGCCCCGTGC	17	0	2	0	5	0	41	0	14	0	14	0	7	0	100
GGTGCGAGGGCCGAAACTCATCGTTCCAGGCCCCGTGC	7	0	1	0	9	0	18	0	10	0	25	0	21	0	91
GAAGCGAAAACAGGGCGCACCCATCGTGCCCAGCCCCGTCTG	57	0	1	0	0	0	0	0	0	0	0	0	0	0	58
GCCACACGGGAGTAGAACCCCGACACTGTGGTAGCCGCCC	9	0	0	0	0	0	1	0	0	0	0	0	0	0	10
GGTGTCGTAGGGACCGAACTATCGTTCCAGGCCCGTGC	2	0	1	0	2	0	9	0	5	0	17	0	27	0	63
TGAGTTGTAGGGCCGAAACTCATCGTTCCAGGCCCCGTGC	1006	0.0002	316	0.0002	774	0.0002	3490	0.0003	1154	0.0002	1750	0.0001	3567	0.0002	12057
GGTGTCGTAGGGCCGAACCATCATTCCTGCCCGGCCGTCG	0	0	0	0	3	0	9	0	6	0	23	0	17	0	58
GAGTGTGTAGGGCCGAAACTCATCGTTCCCAGGCCCCCGTGC	8	0	3	0	6	0	24	0	9	0	12	0	16	0	78
GGATGTCGTAGGGCCGAAAGCTCATCGTTCCAGGCCCCGTGC	2	0	1	0	4	0	9	0	10	0	17	0	22	0	65
GGTGTCGTAGGGCCGAACCATCGTTCCATGCCCGCCGCG	16	0	3	0	4	0	25	0	4	0	47	0	41	0	140
TGAGTTGTAGGGCCGAACTCATCCGTTGCCAGGCCCGTGC	11	0	4	0	6	0	11	0	6	0	7	0	10	0	55
TGAGTTGGGGTAGGGCCGAACTCATCGTTCCAGGCCCCGTGC	3	0	1	0	3	0	8	0	4	0	5	0	5	0	29
GGATGTCGTAGGGCCGAACTCATCGTTCCAGCCCGTGC	3	0	0	0	2	0	16	0	7	0	26	0	24	0	78

## Sheet: Cluster_Composition
represenative.sequence	read.sequence	Round1.count	Round1.percent	Round2.count	Round2.percent	Round3.count	Round3.percent	Round4.count	Round4.percent	Round5.count	Round5.percent	Round6.count	Round6.percent	Round7.count	Round7.percent	total.count
GGTGTCGTAGGGCCGAACTCATCGTTCCAGGCCCCGTGC	Total Number of Reads = 44866985	Number of Unique Sequences = 3494
	GGTGTCGTAGGGCCGAACTCATCGTTCCAGGCCCCGTGC	657528	0.17	384716	0.34	1404740	0.54	5114262	0.69	5067489	0.9	12341164	0.95	11054431	0.95	36024330
	AGTGTTGTAGGGCCGAACTCATCGTTCCAGGCCCCGTGC	2747577	0.73	633740	0.56	946184	0.36	1601609	0.21	234137	0.04	122114	0	63120	0	6348481
	GGTGTTGTAGGGCCGAACTCATCGTTCCAGGCCCCGTGC	56793	0.01	28047	0.02	69171	0.02	172623	0.02	71736	0.01	67908	0	41325	0	507603
	AGTGTCGTAGGGCCGAACTCATCGTTCCAGGCCCCGTGC	113426	0.03	32325	0.02	66672	0.02	135220	0.01	36536	0	24619	0	14124	0	422922
GTGAGTGTAGGGCCGAACTCATCGTTCCAGGCCCCGTGC	Total Number of Reads = 1507485	Number of Unique Sequences = 817
	GTGAGTGTAGGGCCGAACTCATCGTTCCAGGCCCCGTGC	5796	0.09	1247	0.12	9494	0.24	155281	0.36	74944	0.56	291051	0.66	313416	0.76	851229
	GAGTGTGTAGGGCCGAACTCATCGTTCCAGGCCCCGTGC	42978	0.73	7170	0.72	23417	0.59	186447	0.44	38814	0.29	63296	0.14	19969	0.04	382091
	GTGTGTGTAGGGCCGAACTCATCGTTCCAGGCCCCGTGC	6331	0.1	898	0.09	4575	0.11	59862	0.14	13669	0.1	65054	0.14	63316	0.15	213705
	GAGAGTGTAGGGCCGAACTCATCGTTCCAGGCCCCGTGC	305	0	37	0	257	0	3246	0	1230	0	2855	0	1838	0	9768
	GTGTGCGTAGGGCCGAACTCATCGTTCCAGGCCCCGTGC	215	0	60	0	308	0	2681	0	865	0	2246	0	1239	0	7614
GTGATGTGTAGGGCCGAACTCATCGTTCCAGGCCCCGTGC	Total Number of Reads = 434537	Number of Unique Sequences = 508
	GTGATGTGTAGGGCCGAACTCATCGTTCCAGGCCCCGTGC	2203	0.49	448	0.34	3635	0.56	56965	0.76	35176	0.82	136803	0.89	131555	0.86	366785
	GTGAGTTGTAGGGCCGAACTCATCGTTCCAGGCCCCGTGC	1537	0.34	714	0.55	2192	0.34	10833	0.14	4213	0.09	7975	0.05	12937	0.08	40401
	TGATGTGTAGGGCCGAACTCATCGTTCCAGGCCCCGTGC	129	0.02	35	0.02	143	0.02	1834	0.02	796	0.01	2578	0.01	2336	0.01	7851
	GAGATGTGTAGGGCCGAACTCATCGTTCCAGGCCCCGTGC	126	0.02	13	0.01	107	0.01	1256	0.01	517	0.01	1514	0	795	0	4328
GGTGTCGTAGGGCCGAACTCATCGTTCCAGGCCCGTGC	Total Number of Reads = 337181	Number of Unique Sequences = 1095
	GGTGTCGTAGGGCCGAACTCATCGTTCCAGGCCCGTGC	3997	0.19	2247	0.38	7484	0.54	28904	0.61	38761	0.76	90972	0.81	70328	0.8	242693
	AGTGTTGTAGGGCCGAACTCATCGTTCCAGGCCCGTGC	11839	0.58	2435	0.41	3280	0.23	6042	0.12	1067	0.02	528	0	239	0	25430
	GGTGTCGTAGGGCCGAACTCATCGTTCCAGCCCCGTGC	282	0.01	111	0.01	482	0.03	1541	0.03	2406	0.04	4899	0.04	4985	0.05	14706
	GGTGTCGTAGGGCCGAACTCATCGTTCCAGGCCCCTGCG	23	0	18	0	107	0	682	0.01	568	0.01	3523	0.03	2152	0.02	7073
	GGTGTCGTAGGGCCGAACTCATCGTTCCAGGCCCGTGT	307	0.01	78	0.01	209	0.01	1148	0.02	1436	0.02	1469	0.01	721	0	5368
	GGGTGTCGTAGGGCCGAACTCATCGTTCCAGGCCCGTGC	100	0	51	0	145	0.01	580	0.01	765	0.01	1084	0	1137	0.01	3862
	GTGTGTCGTAGGGCCGAACTCATCGTTCCAGGCCCGTGC	92	0	9	0	54	0	759	0.01	213	0	906	0	723	0	2756
	AGTGTCGTAGGGCCGAACTCATCGTTCCAGGCCCGTGC	742	0.03	200	0.03	359	0.02	835	0.01	300	0	200	0	97	0	2733
	GGTGTCGTAGGGCCGAACTCATCGTTCCAGGCCCGTGCC	31	0	20	0	81	0	319	0	354	0	931	0	704	0	2440
	GAGTGTCGTAGGGCCGAACTCATCGTTCCAGGCCCGTGC	294	0.01	43	0	126	0	883	0.01	317	0	366	0	132	0	2161
	GGTGTCGTAGGGCCGAACTCATCGTCCCAGGCCCGTGC	19	0	17	0	59	0	261	0	203	0	814	0	633	0	2006
	GGTGTCGTAGGGCCGAACCCATCGTTCCAGCCCCGTGC	22	0	14	0	63	0	226	0	350	0	477	0	676	0	1828
GGTGTCGTAGGGCCGAACTCATCGTTCCAGGCCCCCGTGC	Total Number of Reads = 497395	Number of Unique Sequences = 1427
	GGTGTCGTAGGGCCGAACTCATCGTTCCAGGCCCCCGTGC	5322	0.09	2841	0.18	12236	0.31	40299	0.43	32432	0.52	53946	0.52	74617	0.57	221693
	AGTGTTGTAGGGCCGAACTCATCGTTCCAGGCCCCCGTGC	40845	0.74	8954	0.58	16267	0.41	20018	0.21	2317	0.03	874	0	762	0	90037
	GGGTGTCGTAGGGCCGAACTCATCGTTCCAGGCCCCCGTGC	1906	0.03	1148	0.07	4518	0.11	14268	0.15	12402	0.2	16135	0.15	21088	0.16	71465
	GGTGTCGTAGGGCCGAACTCATCGTTCCAAGGCCCCGTGC	335	0	210	0.01	676	0.01	2311	0.02	2726	0.04	5780	0.05	7199	0.05	19237
	GGTGTCGTAGGGCCGAACTCATCGTTCCAGGCCCCAGTGC	143	0	112	0	396	0.01	1853	0.01	1662	0.02	6304	0.06	5346	0.04	15816
	GGTGTCGTAGGGCCGAACTCATCGTTCCAGGCCCCGGTGC	168	0	140	0	417	0.01	1411	0.01	1355	0.02	3361	0.03	3665	0.02	10517
	GGTGTCGTAGGGCCGAACTCATCGTTCCAGGGCCCCGTGC	111	0	72	0	262	0	1251	0.01	851	0.01	2373	0.02	2758	0.02	7678
	GGTGTCGTAGGGCCGAACTCATCGTTCCAGGCCCTCGTGC	85	0	47	0	162	0	803	0	807	0.01	3125	0.03	2481	0.01	7510
	GGTGTCGTAGGGCCGAACTCATCGTTCCAGGCCCCTGTGC	113	0	56	0	181	0	739	0	844	0.01	2094	0.02	2284	0.01	6311
	GGTGTTGTAGGGCCGAACTCATCGTTCCAGGCCCCCGTGC	723	0.01	237	0.01	746	0.01	1789	0.01	912	0.01	649	0	577	0	5633
	GGTGTCGTAGGGCCGAACTCATCGTTCCAGGCCCACGTGC	49	0	39	0	135	0	482	0	502	0	1242	0.01	1131	0	3580
	AGTGTCGTAGGGCCGAACTCATCGTTCCAGGCCCCCGTGC	907	0.01	248	0.01	634	0.01	985	0.01	224	0	98	0	89	0	3185
GGTGTCGTAGGCCGAACTCATCGTTCCAGGCCCCGTGC	Total Number of Reads = 409512	Number of Unique Sequences = 1108
	GGTGTCGTAGGCCGAACTCATCGTTCCAGGCCCCGTGC	3412	0.05	1991	0.13	7477	0.22	27722	0.36	29307	0.72	70348	0.76	65919	0.75	206176
	AGTGTTGTAGGCCGAACTCATCGTTCCAGGCCCCGTGC	55486	0.85	11392	0.75	21419	0.64	33760	0.44	3204	0.07	2501	0.02	1416	0.01	129178
	GGTGTCGTAGGGCGAACTCATCGTTCCAGGCCCCGTGC	363	0	203	0.01	878	0.02	3316	0.04	2465	0.06	6715	0.07	8368	0.09	22308
	GGTGTCGAGGGCCGAACTCATCGTTCCAGGCCCCGTGC	81	0	56	0	213	0	848	0.01	703	0.01	1699	0.01	1735	0.01	5335
	GGTGTCGTAGGGCCAACTCATCGTTCCAGGCCCCGTGC	73	0	44	0	208	0	657	0	589	0.01	1920	0.02	1833	0.02	5324
	GGTGTCGTGGGCCGAACTCATCGTTCCAGGCCCCGTGC	20	0	11	0	64	0	280	0	382	0	1246	0.01	1249	0.01	3252
	AGTGTCGTAGGCCGAACTCATCGTTCCAGGCCCCGTGC	725	0.01	198	0.01	518	0.01	1015	0.01	223	0	152	0	109	0	2940
	GGTGTCGTAGGCGCAACTCATCGTTCCAGGCCCCGTGC	28	0	22	0	106	0	356	0	286	0	1240	0.01	893	0.01	2931
	GGTGTTGTAGGCCGAACTCATCGTTCCAGGCCCCGTGC	206	0	167	0.01	325	0	1758	0.02	25	0	285	0	126	0	2892
GGTGTCGTAGGGCCGAAACTCATCGTTCCAGGCCCCGTGC	Total Number of Reads = 136614	Number of Unique Sequences = 1005
	GGTGTCGTAGGGCCGAAACTCATCGTTCCAGGCCCCGTGC	1394	0.09	834	0.18	2508	0.33	8666	0.41	10468	0.62	23877	0.67	24522	0.67	72269
	AGTGTTGTAGGGCCGAAACTCATCGTTCCAGGCCCCGTGC	11889	0.76	2904	0.64	3230	0.42	6036	0.29	834	0.04	491	0.01	294	0	25678
	GGTGTCGTAGGGCCGGAACTCATCGTTCCAGGCCCCGTGC	109	0	54	0.01	242	0.03	729	0.03	814	0.04	1492	0.04	1757	0.04	5197
	GGTGTCGTAGGGCCCGAACTCATCGTTCCAGGCCCCGTGC	82	0	43	0	152	0.02	582	0.02	618	0.03	1688	0.04	1636	0.04	4801
	GGTGTCGTAGGGCCGAACTTCATCGTTCCAGGCCCCGTGC	74	0	60	0.01	128	0.01	556	0.02	468	0.02	1405	0.03	1592	0.04	4283
	GGTGTCGTAGGGCCGAACATCATCGTTCCAGGCCCCGTGC	40	0	18	0	79	0.01	505	0.02	381	0.02	1334	0.03	1183	0.03	3540
	GGTGTCGTAGGGCCGAAGCTCATCGTTCCAGGCCCCGTGC	35	0	32	0	93	0.01	273	0.01	432	0.02	705	0.01	744	0.02	2314
	GGTGTCGTAGGGCCGAACCTCATCGTTCCAGGCCCCGTGC	28	0	20	0	62	0	240	0.01	309	0.01	656	0.01	579	0.01	1894
	GGTGTCGTAGGGTCCGAACTCATCGTTCCAGGCCCCGTGC	21	0	5	0	60	0	195	0	218	0.01	500	0.01	630	0.01	1629
	GGTGTCGTAGGGCCGTAACTCATCGTTCCAGGCCCCGTGC	30	0	15	0	58	0	236	0.01	207	0.01	495	0.01	527	0.01	1568
	GGTGTTGTAGGGCCGAAACTCATCGTTCCAGGCCCCGTGC	159	0.01	43	0	126	0.01	274	0.01	183	0.01	128	0	92	0	1005
	AGTGTCGTAGGGCCGAAACTCATCGTTCCAGGCCCCGTGC	263	0.01	65	0.01	114	0.01	276	0.01	87	0	49	0	34	0	888
	GGTGTCGTAGGGCCGAACCCCATCGTTCCAGGCCCCGTGC	19	0	9	0	32	0	95	0	486	0.02	52	0	125	0	818
	GTGTCGTAGGGCCGAAACTCATCGTTCCAGGCCCCGTGC	16	0	4	0	32	0	91	0	96	0	265	0	246	0	750
GAAGCGAAACAGGGCGCACCCATCGTGCCAGCCCCGTCTG	Total Number of Reads = 74708	Number of Unique Sequences = 286
	GAAGCGAAACAGGGCGCACCCATCGTGCCAGCCCCGTCTG	65012	0.87	436	0.82	13	0.81	19	0.63	0	0	1	1	0	0	65481
	GAAGCGAAACAGGGCGCACTCATCGTGCCAGCCCCGTCTG	3690	0.04	45	0.08	1	0.06	0	0	0	0	0	0	0	0	3736
	GGAAGCGAAACAGGGCGCACCCATCGTGCCAGCCCCGTCTG	736	0	8	0.01	0	0	0	0	0	0	0	0	0	0	744
	GAACCGAAACAGGGCGCACCCATCGTGCCAGCCCCGTCTG	472	0	6	0.01	0	0	0	0	0	0	0	0	0	0	478
GGTGTCGTAGGGCCGAACTCATCGTTCCCAGGCCCCGTGC	Total Number of Reads = 161595	Number of Unique Sequences = 833
	GGTGTCGTAGGGCCGAACTCATCGTTCCCAGGCCCCGTGC	929	0.04	1041	0.13	3523	0.22	9233	0.33	10298	0.51	24278	0.8	28673	0.69	77975
	AGTGTTGTAGGGCCGAACTCATCGTTCCCAGGCCCCGTGC	10730	0.55	4058	0.52	6875	0.43	6108	0.22	2349	0.11	494	0.01	645	0.01	31259
	TGAGTTGTAGGGCCGAACTCATCGTTCCCAGGCCCCGTGC	1596	0.08	774	0.1	2711	0.17	6589	0.24	5365	0.27	3443	0.11	9575	0.23	30053
	AGTGTTGTAGGGCCGAACTCATCGTTCCAAGGCCCCGTGC	1409	0.07	293	0.03	431	0.02	739	0.02	95	0	52	0	38	0	3057
	TGAGTTGTAGGGCCGAACTCATCGTTCCAAGGCCCCGTGC	127	0	38	0	136	0	530	0.01	179	0	232	0	682	0.01	1924
	GTGTCGTAGGGCCGAACTCATCGTTCCCAGGCCCCGTGC	18	0	14	0	41	0	267	0	168	0	461	0.01	500	0.01	1469
	AGAGTTGTAGGGCCGAACTCATCGTTCCCAGGCCCCGTGC	287	0.01	78	0.01	171	0.01	358	0.01	178	0	65	0	176	0	1313
	AGTGTTGTAGGGCCGAACTCATCGTTGCCAGGCCCCGTGC	431	0.02	334	0.04	145	0	295	0.01	24	0	19	0	10	0	1258
	AGTGTTGTAGGGCCGAACTCATCGATTCCAGGCCCCGTGC	506	0.02	105	0.01	144	0	248	0	45	0	18	0	6	0	1072
	AGTGTTGTAGGGCCGAACTCATCGTTTCCAGGCCCCGTGC	469	0.02	98	0.01	169	0.01	251	0	26	0	14	0	21	0	1048
	GGTGTTGTAGGGCCGAACTCATCGTTCCCAGGCCCCGTGC	121	0	46	0	100	0	283	0.01	177	0	121	0	98	0	946
	AGTGTTGTAGGGCCGAACTCATCGTTCCAGGGCCCCGTGC	419	0.02	77	0.01	110	0	233	0	40	0	15	0	13	0	907
	GAGTGTTGTAGGGCCGAACTCATCGTTCCCAGGCCCCGTGC	261	0.01	124	0.01	189	0.01	215	0	44	0	23	0	12	0	868
GAAGCGAAACAGGGCGCACCCATCGTGCCAGCCCGTCTG	Total Number of Reads = 18520	Number of Unique Sequences = 138
	GAAGCGAAACAGGGCGCACCCATCGTGCCAGCCCGTCTG	16921	0.92	136	0.89	5	1	5	1	0	0	0	0	0	0	17067
	AAGCGAAACAGGGCGCACCCATCGTGCCAGCCCGTCTG	320	0.01	2	0.01	0	0	0	0	0	0	0	0	0	0	322
	GAAGCGAAACAGGGCGCACCCATCGTGCCAGCCCGTCTGC	132	0	0	0	0	0	0	0	0	0	0	0	0	0	132
	GAAGCGAAACAGGGCGCACTCATCGTGCCAGCCCGTCTG	95	0	3	0.01	0	0	0	0	0	0	0	0	0	0	98
GAAGCGAAAACAGGGCGCACCCATCGTGCCAGCCCCGTCTG	Total Number of Reads = 14945	Number of Unique Sequences = 166
	GAAGCGAAAACAGGGCGCACCCATCGTGCCAGCCCCGTCTG	12761	0.86	91	0.81	0	0	2	0.5	0	0	0	0	1	1	12855
	GAAGCGAAAACAGGGCGCACTCATCGTGCCAGCCCCGTCTG	737	0.04	8	0.07	0	0	0	0	0	0	0	0	0	0	745
	GGAAGCGAAAACAGGGCGCACCCATCGTGCCAGCCCCGTCTG	251	0.01	3	0.02	0	0	0	0	0	0	0	0	0	0	254
	GAAGCGAAACAGGGGCGCACCCATCGTGCCAGCCCCGTCTG	179	0.01	0	0	0	0	0	0	0	0	0	0	0	0	179
	GAAGCGAAACGAGGGCGCACCCATCGTGCCAGCCCCGTCTG	120	0	0	0	0	0	0	0	0	0	0	0	0	0	120
	GAGGCGAAAACAGGGCGCACCCATCGTGCCAGCCCCGTCTG	80	0	1	0	0	0	0	0	0	0	0	0	0	0	81
GGTGTCGTAGGGCCGAATCATCGTTCCAGGCCCCGTGC	Total Number of Reads = 46734	Number of Unique Sequences = 551
	GGTGTCGTAGGGCCGAATCATCGTTCCAGGCCCCGTGC	250	0.14	197	0.3	667	0.36	3503	0.45	1377	0.25	5412	0.38	6649	0.43	18055
	GGTGTCGTAGGGCCGAACTATCGTTCCAGGCCCCGTGC	251	0.14	127	0.19	407	0.22	1738	0.22	1946	0.36	4159	0.29	4210	0.27	12838
	GGTGTCGTAGGGCCGAACTCACGTTCCAGGCCCCGTGC	130	0.07	62	0.09	252	0.13	738	0.09	968	0.18	1795	0.12	1776	0.11	5721
	GGTGTCGTAGGGCCGAACTCATGTTCCAGGCCCCGTGC	133	0.07	27	0.04	69	0.03	363	0.04	306	0.05	975	0.06	750	0.04	2623
	GGTGTCGTAGGGCCGAACTCTCGTTCCAGGCCCCGTGC	48	0.02	26	0.03	67	0.03	362	0.04	251	0.04	838	0.05	889	0.05	2481
	AGTGTTGTAGGGCCGAACTATCGTTCCAGGCCCCGTGC	560	0.32	98	0.15	120	0.06	260	0.03	29	0	23	0	18	0	1108
	GGGTGTCGTAGGGCCGAACTATCGTTCCAGGCCCCGTGC	9	0	6	0	13	0	61	0	57	0.01	123	0	156	0.01	425
	GGTGTCGTAGGGCCGAACCATCGTTCCAGGCCCCGTGC	7	0	5	0	11	0	78	0.01	6	0	123	0	151	0	381
	GGTGTTGTAGGGCCGAACTATCGTTCCAGGCCCCGTGC	38	0.02	16	0.02	27	0.01	132	0.01	66	0.01	50	0	40	0	369
GGTGTCGTAAGGGCCGAACTCATCGTTCCAGGCCCCGTGC	Total Number of Reads = 45106	Number of Unique Sequences = 726
	GGTGTCGTAAGGGCCGAACTCATCGTTCCAGGCCCCGTGC	225	0.01	212	0.07	477	0.1	1736	0.18	1533	0.35	3588	0.68	4516	0.64	12287
	AGTGTTGTAAGGGCCGAACTCATCGTTCCAGGCCCCGTGC	5337	0.45	1277	0.42	1684	0.37	2254	0.24	779	0.17	207	0.03	149	0.02	11687
	TGAGTTGTAAGGGCCGAACTCATCGTTCCAGGCCCCGTGC	326	0.02	112	0.03	324	0.07	1325	0.14	402	0.09	582	0.11	1417	0.2	4488
	AGTGTTGGTAGGGCCGAACTCATCGTTCCAGGCCCCGTGC	1110	0.09	381	0.12	575	0.12	629	0.06	289	0.06	66	0.01	69	0	3119
	AGTGTTGTAGGGCCCGAACTCATCGTTCCAGGCCCCGTGC	985	0.08	251	0.08	310	0.06	626	0.06	69	0.01	64	0.01	35	0	2340
	AGTGTTGTAGGGGCCGAACTCATCGTTCCAGGCCCCGTGC	755	0.06	123	0.04	188	0.04	425	0.04	68	0.01	29	0	15	0	1603
	AGTGTTGTACGGGCCGAACTCATCGTTCCAGGCCCCGTGC	325	0.02	51	0.01	113	0.02	323	0.03	23	0	14	0	7	0	856
	AGTGTTGTTAGGGCCGAACTCATCGTTCCAGGCCCCGTGC	431	0.03	76	0.02	95	0.02	186	0.01	13	0	13	0	6	0	820
	GGTGTTGTAGGGGCCGAACTCATCGTTCCAGGCCCCGTGC	44	0	14	0	42	0	70	0	476	0.1	61	0.01	54	0	761
	GGTGTCGTACGGGCCGAACTCATCGTTCCAGGCCCCGTGC	17	0	6	0	20	0	120	0.01	74	0.01	203	0.03	230	0.03	670
	TGAGTTGTACGGGCCGAACTCATCGTTCCAGGCCCCGTGC	34	0	12	0	28	0	196	0.02	33	0	47	0	114	0.01	464
	AGTGTTGTAGGGACCGAACTCATCGTTCCAGGCCCCGTGC	219	0.01	60	0.02	53	0.01	95	0.01	14	0	7	0	10	0	458
	AGTGTTGCTAGGGCCGAACTCATCGTTCCAGGCCCCGTGC	151	0.01	28	0	63	0.01	98	0.01	6	0	6	0	0	0	352
	AGTGTTGTAGGGTCCGAACTCATCGTTCCAGGCCCCGTGC	132	0.01	24	0	50	0.01	67	0	19	0	8	0	5	0	305
	AGAGTTGTAAGGGCCGAACTCATCGTTCCAGGCCCCGTGC	81	0	7	0	28	0	63	0	40	0	16	0	21	0	256
	AGTGTTGTGGGGGCCGAACTCATCGTTCCAGGCCCCGTGC	113	0	18	0	48	0.01	56	0	20	0	1	0	0	0	256
	AGTGTCGTAAGGGCCGAACTCATCGTTCCAGGCCCCGTGC	68	0	19	0	48	0.01	66	0	23	0	15	0	7	0	246
GGTGTCGTAGGGCCGAACTCAATCGTTCCAGGCCCCGTGC	Total Number of Reads = 51845	Number of Unique Sequences = 647
	GGTGTCGTAGGGCCGAACTCAATCGTTCCAGGCCCCGTGC	184	0.08	101	0.12	366	0.16	924	0.12	1745	0.25	2911	0.18	3364	0.19	9595
	GGTGTCGTAGGGCCGAACTCATCCGTTCCAGGCCCCGTGC	150	0.06	71	0.08	297	0.13	1098	0.15	1144	0.16	3271	0.2	3093	0.18	9124
	GGTGTCGTAGGGCCGAACTCATCGGTTCCAGGCCCCGTGC	168	0.07	90	0.11	364	0.16	1452	0.2	1044	0.15	2381	0.15	2811	0.16	8310
	GGTGTCGTAGGGCCGAACTCATTCGTTCCAGGCCCCGTGC	216	0.09	51	0.06	156	0.07	806	0.11	602	0.08	2522	0.16	1909	0.11	6262
	GGTGTCGTAGGGCCGAACTCATCGATTCCAGGCCCCGTGC	100	0.04	63	0.07	236	0.1	784	0.1	872	0.12	1968	0.12	1983	0.11	6006
	GGTGTCGTAGGGCCGAACTCATCGTTTCCAGGCCCCGTGC	113	0.05	68	0.08	169	0.07	652	0.09	744	0.1	1391	0.08	2356	0.13	5493
	AGTGTTGTAGGGCCGAACTCATCCGTTCCAGGCCCCGTGC	819	0.37	270	0.33	360	0.16	568	0.07	52	0	44	0	24	0	2137
	GGGTGTCGTAGGGCCGAACTCATCCGTTCCAGGCCCCGTGC	11	0	5	0	14	0	66	0	53	0	126	0	134	0	409
	GGGTGTCGTAGGGCCGAACTCATCGGTTCCAGGCCCCGTGC	8	0	4	0	17	0	52	0	50	0	65	0	129	0	325
GTGAGTGTAGGGCCGAACTCATCGTTCCAGGCCCCCGTGC	Total Number of Reads = 17722	Number of Unique Sequences = 331
	GTGAGTGTAGGGCCGAACTCATCGTTCCAGGCCCCCGTGC	84	0.08	12	0.06	130	0.15	1534	0.26	725	0.43	1501	0.43	2584	0.54	6570
	GAGTGTGTAGGGCCGAACTCATCGTTCCAGGCCCCCGTGC	645	0.62	115	0.66	457	0.54	2375	0.4	396	0.23	390	0.11	230	0.04	4608
	GTGTGTGTAGGGCCGAACTCATCGTTCCAGGCCCCCGTGC	83	0.08	7	0.04	60	0.07	487	0.08	110	0.06	342	0.09	429	0.09	1518
	TGAGTGTAGGGCCGAACTCATCGTTCCAGGCCCCCGTGC	35	0.03	14	0.08	40	0.04	295	0.05	99	0.05	141	0.04	279	0.05	903
	GTGAGTGTAGGGCCGAACTCATCGTTCCAAGGCCCCGTGC	6	0	0	0	6	0	79	0.01	34	0.02	131	0.03	163	0.03	419
	GTGAGTGTAGGGCCGAACTCATCGTTCCAGGCCCCAGTGC	7	0	1	0	5	0	45	0	21	0.01	101	0.02	98	0.02	278
	GTGAGTGTAGGGCCGAACTCATCGTTCCAGGCCCTCGTGC	0	0	0	0	7	0	37	0	21	0.01	85	0.02	107	0.02	257
	GTGAGTGTAGGGCCGAACTCATCGTTCCAGGCCCCGGTGC	8	0	1	0	7	0	51	0	18	0.01	72	0.02	69	0.01	226
	TGAGTGTAGGGCCGAACTCATCGTTCCAGGCCCCGGTGC	8	0	5	0.02	14	0.01	63	0.01	10	0	27	0	44	0	171
	GTGAGTGTAGGGCCGAACTCATCGTTCCAGGCCCCTGTGC	2	0	0	0	2	0	20	0	19	0.01	55	0.01	64	0.01	162
	TGAGTTTGTAGGGCCGAACTCATCGTTCCAGGCCCCCGTGC	27	0.02	3	0.01	18	0.02	55	0	15	0	11	0	33	0	162
	GAGTGTGTAGGGCCGAACTCATCGTTCCAGGCCCTCGTGC	18	0.01	1	0	6	0	82	0.01	10	0	20	0	10	0	147
	GAGAGTGTAGGGCCGAACTCATCGTTCCAGGCCCCCGTGC	6	0	2	0.01	4	0	50	0	12	0	30	0	21	0	125
	GTGTGTGTAGGGCCGAACTCATCGTTCCAGGCCCCGGTGC	13	0.01	0	0	3	0	29	0	4	0	33	0	20	0	102
	GTGAGTGTAGGGCCGAACTCATCGTTCCAGGGCCCCGTGC	0	0	1	0	1	0	18	0	7	0	30	0	45	0	102
GTGATGTGTAGGGCCGAACTCATCGTTCCAGGCCCCCGTGC	Total Number of Reads = 9257	Number of Unique Sequences = 207
	GTGATGTGTAGGGCCGAACTCATCGTTCCAGGCCCCCGTGC	56	0.28	12	0.28	104	0.42	1177	0.59	638	0.69	1524	0.67	2577	0.71	6088
	GTGAGTTGTAGGGCCGAACTCATCGTTCCAGGCCCCCGTGC	53	0.26	18	0.42	77	0.31	287	0.14	96	0.1	116	0.05	355	0.09	1002
	GTGATGTGTAGGGCCGAACTCATCGTTCCAGGCCCCAGTGC	5	0.02	0	0	6	0.02	42	0.02	17	0.01	77	0.03	76	0.02	223
	GTGATGTGTAGGGCCGAACTCATCGTTCCAGGCCCTCGTGC	2	0.01	0	0	1	0	23	0.01	14	0.01	70	0.03	76	0.02	186
	ATGAGTTGTAGGGCCGAACTCATCGTTCCAGGCCCCCGTGC	33	0.16	3	0.07	13	0.05	85	0.04	4	0	5	0	7	0	150
	GTGATGTGTAGGGCCGAACTCATCGTTCCAAGGCCCCGTGC	1	0	0	0	2	0	27	0.01	13	0.01	57	0.02	44	0.01	144
	GTGATGTGTAGGGCCGAACTCATCGTTCCAGGCCCCGGTGC	7	0.03	0	0	2	0	35	0.01	9	0	47	0.02	42	0.01	142
	GTGATGTGTAGGGCCGAACTCATCGTTCCAGGCCCCTGTGC	0	0	0	0	1	0	23	0.01	7	0	41	0.01	53	0.01	125
	GTGATGTGTAGGGCCGAACTCATCGTTCCAGGCCACCGTGC	0	0	0	0	0	0	16	0	7	0	36	0.01	40	0.01	99
	GAGATGTGTAGGGCCGAACTCATCGTTCCAGGCCCCCGTGC	3	0.01	1	0.02	5	0.02	32	0.01	15	0.01	23	0.01	18	0	97
	TGATGTGTAGGGCCGAACTCATCGTTCCAGGCCCCCGTGC	2	0.01	0	0	2	0	27	0.01	8	0	29	0.01	19	0	87
	GTGATGTGTAGGGCCGAACTCATCGTTCCAGGCCCCCGCG	1	0	0	0	1	0	23	0.01	5	0	27	0.01	27	0	84
	GTGATGTGTAGGGCCGAACTCATCGTTCCAGGCCTCCGTGC	0	0	0	0	0	0	13	0	4	0	25	0.01	31	0	73
	GTGATGTGTAGGGCCGAACTCATCGTTCCAGGCCCCCGTGCC	0	0	0	0	1	0	11	0	8	0	23	0.01	20	0	63
	GTGATGTGTAGGGCCGAACTCATCGTTCCAGGCCCACGTGC	1	0	0	0	1	0	7	0	3	0	18	0	24	0	54
	GTGATGTGTAGGGCCGAACTCATCGTTCCAGGGCCCCGTGC	0	0	0	0	0	0	9	0	4	0	20	0	14	0	47
TGAGTTGTAGGGCCGAATCATCGTTCCAGGCCCCGTGC	Total Number of Reads = 21300	Number of Unique Sequences = 407
	TGAGTTGTAGGGCCGAATCATCGTTCCAGGCCCCGTGC	347	0.1	72	0.09	309	0.15	1361	0.22	647	0.23	718	0.3	1610	0.38	5064
	TGAGTTGTAGGGCCAACTCATCGTTCCAGGCCCCGTGC	319	0.09	112	0.14	306	0.15	1542	0.25	316	0.11	709	0.29	1438	0.34	4742
	GGTGTTGTAGGGCCGAATCATCGTTCCAGGCCCCGTGC	488	0.14	193	0.24	555	0.27	1244	0.2	1081	0.39	378	0.15	313	0.07	4252
	AGTGTTGTAGGGCCGAATCATCGTTCCAGGCCCCGTGC	1522	0.46	295	0.37	518	0.26	905	0.15	205	0.07	73	0.03	70	0.01	3588
	TGAGTTGTAGGGCCGAACTATCGTTCCAGGCCCCGTGC	64	0.01	17	0.02	45	0.02	234	0.03	85	0.03	77	0.03	213	0.05	735
	GGAGTTGTAGGGCCGAATCATCGTTCCAGGCCCCGTGC	17	0	4	0	14	0	61	0.01	84	0.03	68	0.02	64	0.01	312
	TGAGTTGTAGGGCCGACTCATCGTTCCAGGCCCCGTGC	23	0	2	0	9	0	66	0.01	35	0.01	42	0.01	67	0.01	244
	TGAGTTGTAGGGCCGAACTCTCGTTCCAGGCCCCGTGC	19	0	2	0	13	0	43	0	16	0	41	0.01	56	0.01	190
	AGTGTTGTAGGGCCGACTCATCGTTCCAGGCCCCGTGC	73	0.02	20	0.02	28	0.01	41	0	10	0	3	0	6	0	181
	AGAGTTGTAGGGCCGAATCATCGTTCCAGGCCCCGTGC	37	0.01	7	0	16	0	52	0	18	0	11	0	23	0	164
	GGGTGTTGTAGGGCCGAATCATCGTTCCAGGCCCCGTGC	13	0	5	0	26	0.01	25	0	41	0.01	9	0	6	0	125
	GTGAGTCGTAGGGCCGAATCATCGTTCCAGGCCCCGTGC	3	0	0	0	0	0	14	0	9	0	48	0.02	42	0.01	116
	AGAGTTGTAGGGCCAACTCATCGTTCCAGGCCCCGTGC	25	0	1	0	14	0	55	0	4	0	10	0	6	0	115
GGTGTCGGTAGGGCCGAACTCATCGTTCCCAGGCCCCGTGC	Total Number of Reads = 11690	Number of Unique Sequences = 362
	GGTGTCGGTAGGGCCGAACTCATCGTTCCCAGGCCCCGTGC	39	0.02	38	0.06	154	0.13	307	0.17	902	0.44	1432	0.61	1373	0.57	4245
	AGTGTTGGTAGGGCCGAACTCATCGTTCCCAGGCCCCGTGC	1183	0.79	497	0.78	749	0.66	807	0.46	267	0.13	41	0.01	70	0.02	3614
	GGGTGTCGGTAGGGCCGAACTCATCGTTCCCAGGCCCCGTGC	17	0.01	6	0	34	0.03	53	0.03	210	0.1	194	0.08	212	0.08	726
	GGTGTCGGTAGGGCCGAACCCATCGTTCCCAGGCCCCGTGC	0	0	0	0	2	0	5	0	247	0.12	4	0	7	0	265
	GGTGGTCGTAGGGCCGAACTCATCGTTCCCAGGCCCCGTGC	2	0	2	0	7	0	27	0.01	36	0.01	73	0.03	99	0.04	246
	GGTGTGTGTAGGGCCGAACTCATCGTTCCCAGGCCCCGTGC	3	0	3	0	8	0	125	0.07	10	0	36	0.01	40	0.01	225
	AGTGTCGGTAGGGCCGAACTCATCGTTCCCAGGCCCCGTGC	43	0.02	9	0.01	22	0.01	36	0.02	13	0	8	0	12	0	143
	GAGTGTTGGTAGGGCCGAACTCATCGTTCCCAGGCCCCGTGC	42	0.02	15	0.02	32	0.02	26	0.01	18	0	0	0	2	0	135
	GGTGTCGTAAGGGCCGAACTCATCGTTCCCAGGCCCCGTGC	1	0	3	0	6	0	11	0	16	0	39	0.01	52	0.02	128
	TGATGTTGGTAGGGCCGAACTCATCGTTCCCAGGCCCCGTGC	9	0	2	0	8	0	40	0.02	16	0	17	0	30	0.01	122
	GGTGTCGTAAGGGCCGAACTCATCGTTCCAAGGCCCCGTGC	2	0	4	0	7	0	13	0	12	0	32	0.01	43	0.01	113
	ATGTGTTGGTAGGGCCGAACTCATCGTTCCCAGGCCCCGTGC	39	0.02	7	0.01	11	0	32	0.01	8	0	2	0	2	0	101
	GTGTCGGTAGGGCCGAACTCATCGTTCCCAGGCCCCGTGC	3	0	0	0	5	0	9	0	19	0	27	0.01	20	0	83
GGTGTCGTAGGGCCGAACTCATCGTCCAGGCCCCGTGC	Total Number of Reads = 59950	Number of Unique Sequences = 393
	GGTGTCGTAGGGCCGAACTCATCGTCCAGGCCCCGTGC	832	0.18	461	0.35	1553	0.54	6505	0.65	6268	0.86	17761	0.93	13728	0.91	47108
	AGTGTTGTAGGGCCGAACTCATCGTCCAGGCCCCGTGC	1773	0.39	391	0.3	527	0.18	958	0.09	154	0.02	90	0	52	0	3945
	TGAGTTGTAGGGCCGAACTCATCGTCCAGGCCCCGTGC	236	0.05	78	0.06	206	0.07	907	0.09	405	0.05	573	0.03	771	0.05	3176
	AGTGTTGTAGGGCCGAACTCATCTTCCAGGCCCCGTGC	334	0.07	90	0.07	131	0.04	327	0.03	19	0	29	0	10	0	940
	AGTGTTGTAGGGCCGAACTCACGTTCCAGGCCCCGTGC	242	0.05	54	0.04	52	0.01	94	0	25	0	5	0	8	0	480
	AGTGTTGTAGGGCCGAACTCATCGTTCAGGCCCCGTGC	244	0.05	24	0.01	33	0.01	150	0.01	14	0	9	0	2	0	476
	AGTGTCGTAGGGCCGAACTCATCGTCCAGGCCCCGTGC	123	0.02	38	0.02	48	0.01	129	0.01	35	0	39	0	17	0	429
	TGAGTTGTAGGGCCGAACTCATCGTTCAGGCCCCGTGC	34	0	5	0	18	0	124	0.01	26	0	54	0	50	0	311
GTGAGTGTAGGCCGAACTCATCGTTCCAGGCCCCGTGC	Total Number of Reads = 11638	Number of Unique Sequences = 223
	GTGAGTGTAGGCCGAACTCATCGTTCCAGGCCCCGTGC	27	0.06	5	0.08	34	0.12	632	0.2	253	0.28	1412	0.38	1309	0.4	3672
	GTGAGTGTAGGGCCAACTCATCGTTCCAGGCCCCGTGC	20	0.04	1	0.01	28	0.1	503	0.16	157	0.17	1046	0.28	1054	0.32	2809
	GAGTGTGTAGGCCGAACTCATCGTTCCAGGCCCCGTGC	190	0.46	24	0.42	113	0.42	855	0.27	138	0.15	292	0.07	106	0.03	1718
	GTGTGTGTAGGCCGAACTCATCGTTCCAGGCCCCGTGC	25	0.06	2	0.03	12	0.04	218	0.07	48	0.05	250	0.06	229	0.07	784
	GAGTGTGTGGGCCGAACTCATCGTTCCAGGCCCCGTGC	20	0.04	2	0.03	17	0.06	248	0.08	55	0.06	134	0.03	67	0.02	543
	GTGAGTGTGGGCCGAACTCATCGTTCCAGGCCCCGTGC	16	0.03	1	0.01	5	0.01	114	0.03	63	0.07	114	0.03	82	0.02	395
	GTGTGTGTGGGCCGAACTCATCGTTCCAGGCCCCGTGC	6	0.01	0	0	1	0	57	0.01	26	0.02	69	0.01	37	0.01	196
	GTGAGTGAGGGCCGAACTCATCGTTCCAGGCCCCGTGC	2	0	0	0	2	0	27	0	13	0.01	37	0.01	39	0.01	120
	GTGAGTGTAGGGCGAACTCATCGTTCCAGGCCCCGTGC	0	0	0	0	2	0	29	0	6	0	33	0	49	0.01	119
	GTGTGTGAGGGCCGAACTCATCGTTCCAGGCCCCGTGC	7	0.01	1	0.01	2	0	41	0.01	2	0	30	0	27	0	110
	GTGAGTGTAGGCGCAACTCATCGTTCCAGGCCCCGTGC	0	0	0	0	0	0	19	0	4	0	48	0.01	38	0.01	109
	GAGTGTGAGGGCCGAACTCATCGTTCCAGGCCCCGTGC	20	0.04	2	0.03	2	0	28	0	10	0.01	6	0	4	0	72
	GTGAGTGTAGGGCTAACTCATCGTTCCAGGCCCCGTGC	1	0	0	0	0	0	5	0	12	0.01	28	0	23	0	69
	GAGTGTGTAGGGCGAACTCATCGTTCCAGGCCCCGTGC	4	0	1	0.01	5	0.01	32	0.01	11	0.01	13	0	2	0	68
GGTGTCGTAGGGCCGAAACTCATCGTTCCAGGCCCCCGTGC	Total Number of Reads = 13481	Number of Unique Sequences = 496
	GGTGTCGTAGGGCCGAAACTCATCGTTCCAGGCCCCCGTGC	88	0.05	34	0.08	141	0.17	495	0.22	449	0.27	1102	0.34	1273	0.34	3582
	GGGTGTCGTAGGGCCGAAACTCATCGTTCCAGGCCCCCGTGC	60	0.03	36	0.09	114	0.14	393	0.17	436	0.26	736	0.23	856	0.23	2631
	AGTGTTGTAGGGCCGAAACTCATCGTTCCAGGCCCCCGTGC	1076	0.7	218	0.54	300	0.37	534	0.23	60	0.03	40	0.01	28	0	2256
	GGTGTCGTAGGGCCGAAACTCATCGTTCCAAGGCCCCGTGC	9	0	10	0.02	25	0.03	93	0.04	89	0.05	202	0.06	256	0.06	684
	GGGTGTCGTAGGGCCCGAACTCATCGTTCCAGGCCCCCGTGC	14	0	15	0.03	18	0.02	88	0.03	110	0.06	193	0.06	195	0.05	633
	GGTGTCGTAGGGCCGAAACTCATCGTTCCAGGCCCCGGTGC	10	0	3	0	19	0.02	48	0.02	46	0.02	124	0.03	128	0.03	378
	GGTGTCGTAGGGCCGAAACTCATCGTTCCAGGGCCCCGTGC	4	0	6	0.01	4	0	51	0.02	34	0.02	89	0.02	115	0.03	303
	GGTGTCGTAGGGCCCGAACTCATCGTTCCAGGCCCCCGTGC	8	0	4	0.01	11	0.01	32	0.01	37	0.02	92	0.02	106	0.02	290
	GGTGTCGTAGGGCCGAAACTCATCGTTCCAGGCCCCAGTGC	8	0	3	0	12	0.01	25	0.01	41	0.02	58	0.01	61	0.01	208
	GAGTGTTGTAGGGCCGAAACTCATCGTTCCAGGCCCCCGTGC	57	0.03	12	0.03	20	0.02	35	0.01	8	0	4	0	1	0	137
	GGTGTCGTAGGGCCGAACCCCATCGTTCCAGGCCCCCGTGC	5	0	3	0	6	0	17	0	46	0.02	15	0	23	0	115
	GGTGTCGTAGGGCCGGAACTCATCGTTCCAGGCCCCCGTGC	3	0	0	0	4	0	15	0	13	0	33	0.01	36	0	104
	GGTGTCGTAGGGCCGAAACTCATCGTTCCAGGCCCCTGTGC	2	0	0	0	2	0	17	0	14	0	24	0	31	0	90
	GGGTGTCGTAGGGCCGAAACTCATCGTTCCAAGGCCCCGTGC	1	0	1	0	5	0	7	0	14	0	23	0	39	0.01	90
	GGTGTCGTAGGGCCGAACTTCATCGTTCCAGGCCCCCGTGC	1	0	1	0	1	0	8	0	9	0	30	0	36	0	86
GTGAGTGTAGGGCCGAACTCATCGTTCCAGGCCCGTGC	Total Number of Reads = 7844	Number of Unique Sequences = 190
	GTGAGTGTAGGGCCGAACTCATCGTTCCAGGCCCGTGC	32	0.07	5	0.07	41	0.21	549	0.26	368	0.45	1232	0.5	1084	0.58	3311
	GAGTGTGTAGGGCCGAACTCATCGTTCCAGGCCCGTGC	250	0.61	40	0.61	74	0.39	711	0.34	177	0.21	273	0.11	62	0.03	1587
	GTGTGTGTAGGGCCGAACTCATCGTTCCAGGCCCGTGC	39	0.09	5	0.07	28	0.14	344	0.16	93	0.11	405	0.16	288	0.15	1202
	GTGAGTGTAGGGCCGAACTCATCGTTCCAGCCCCGTGC	4	0	0	0	3	0.01	61	0.02	41	0.05	136	0.05	126	0.06	371
	GTGAGTGTAGGGCCGAACTCATCGTTCCAGGCCCCTGCG	7	0.01	0	0	4	0.02	85	0.04	20	0.02	81	0.03	99	0.05	296
	GTGTGCGTAGGGCCGAACTCATCGTTCCAGGCCCGTGC	3	0	2	0.03	7	0.03	38	0.01	20	0.02	50	0.02	26	0.01	146
	ATGTGTGTAGGGCCGAACTCATCGTTCCAGGCCCGTGC	20	0.04	1	0.01	8	0.04	58	0.02	11	0.01	13	0	4	0	115
	GTGATCGTAGGGCCGAACTCATCGTTCCAGGCCCGTGC	0	0	0	0	1	0	22	0.01	17	0.02	36	0.01	24	0.01	100
	GTGTGTGTAGGGCCGAACTCATCGTTCCAGCCCCGTGC	5	0.01	1	0.01	3	0.01	26	0.01	6	0	32	0.01	23	0.01	96
GGACCTATGCAGTAGCCAGTGTGGACTGGGCTGCCCCCC	Total Number of Reads = 3859	Number of Unique Sequences = 89
	GGACCTATGCAGTAGCCAGTGTGGACTGGGCTGCCCCCC	3231	0.84	7	0.87	0	0	42	0.93	1	1	0	0	0	0	3281
	GGACCTATGCAGTAGCCAGTGTGGACTGGGCTGCCCCCCC	238	0.06	0	0	0	0	3	0.06	0	0	0	0	0	0	241
	GGACCTATGCAGTAGCCAGTGTGGACTGGGCTGCCCTCCC	25	0	0	0	0	0	0	0	0	0	0	0	0	0	25
	GGACCTATGCAGTAGCCAGTGTGGACTGGGCTGCTCCCCC	21	0	0	0	0	0	0	0	0	0	0	0	0	0	21
GGTGTCGTAGGGCCGAACTCATCGTTCCCAGGCCCCCGTGC	Total Number of Reads = 14077	Number of Unique Sequences = 537
	GGTGTCGTAGGGCCGAACTCATCGTTCCCAGGCCCCCGTGC	42	0.03	33	0.06	150	0.12	370	0.18	433	0.24	769	0.27	1297	0.29	3094
	AGTGTTGTAGGGCCGAACTCATCGTTCCCAGGCCCCCGTGC	861	0.66	296	0.57	530	0.43	384	0.18	158	0.08	33	0.01	54	0.01	2316
	GGGTGTCGTAGGGCCGAACTCATCGTTCCCAGGCCCCCGTGC	20	0.01	24	0.04	99	0.08	180	0.08	239	0.13	352	0.12	587	0.13	1501
	GGTGTCGTAGGGCCGAACTCATCGTTCCAGGGCCCCCGTGC	13	0.01	7	0.01	38	0.03	129	0.06	88	0.04	177	0.06	304	0.06	756
	GGTGTCGTAGGGCCGAACTCATCGTTCCAAGGCCCCCGTGC	8	0	6	0.01	25	0.02	84	0.04	80	0.04	147	0.05	260	0.05	610
	GGTGTCGTAGGGCCGAACTCATCGTTTCCAGGCCCCCGTGC	8	0	3	0	23	0.01	56	0.02	59	0.03	84	0.02	197	0.04	430
	GGTGTCGTAGGGCCGAACTCATCGTTCCAGGGGCCCCGTGC	4	0	6	0.01	13	0.01	55	0.02	59	0.03	124	0.04	97	0.02	358
	GGTGTCGTAGGGCCGAACTCATCGTTCCAAAGGCCCCGTGC	9	0	5	0	10	0	45	0.02	33	0.01	113	0.03	122	0.02	337
	GGTGTCGTAGGGCCGAACTCATCGTTCCCAGGGCCCCGTGC	4	0	3	0	18	0.01	28	0.01	31	0.01	98	0.03	121	0.02	303
	GGGTGTCGTAGGGCCGAACTCATCGTTTCCAGGCCCCCGTGC	7	0	3	0	17	0.01	48	0.02	53	0.02	60	0.02	93	0.02	281
	GGTGTCGTAGGGCCGAACTCATCGTTCCCAAGGCCCCGTGC	2	0	1	0	8	0	19	0	43	0.02	79	0.02	120	0.02	272
	GGGTGTCGTAGGGCCGAACTCATCGTTCCAGGGCCCCCGTGC	4	0	6	0.01	10	0	63	0.03	32	0.01	54	0.01	78	0.01	247
	GGTGTCGTAGGGCCGAACTCATCGTTCCCAGGCCCCGGTGC	1	0	2	0	8	0	27	0.01	33	0.01	65	0.02	92	0.02	228
	AGTGTTGTAGGGCCGAACTCATCGTTCCCAGGCCCCCGTGCC	85	0.06	27	0.05	55	0.04	38	0.01	8	0	3	0	3	0	219
	GGTGTCGTAGGGCCGAACTCATCGGTTCCAGGCCCCCGTGC	2	0	4	0	14	0.01	32	0.01	18	0.01	58	0.02	61	0.01	189
	GGTGTCGTAGGGCCGAACTCATCGTTCCCAGGCCCCCGTGCC	1	0	3	0	12	0	14	0	25	0.01	38	0.01	77	0.01	170
	GGTGTCGTAGGGCCGAACTCATCGATTCCAGGCCCCCGTGC	3	0	2	0	5	0	20	0	18	0.01	20	0	38	0	106
	GGTGTCGTAGGGCCGAACTCATCGTTCCAAGGCCCCGGTGC	2	0	1	0	2	0	11	0	17	0	27	0	43	0	103
	AGAGTTGTAGGGCCGAACTCATCGTTCCCAGGCCCCCGTGC	19	0.01	6	0.01	12	0	26	0.01	10	0	6	0	15	0	94
	GGGTGTCGTAGGGCCGAACTCATCGTTCCAAGGCCCCCGTGC	2	0	0	0	3	0	13	0	20	0.01	16	0	36	0	90
	GGTGTCGTAGGGCCGAACTCATCGTTCCAAGGGCCCCGTGC	5	0	2	0	4	0	11	0	8	0	24	0	34	0	88
	GGTGTCGTAGGGCCGAACTCATCGTTCCCAGGCCCCAGTGC	0	0	2	0	3	0	12	0	8	0	24	0	33	0	82
CACTAGCCAGGATAGACCGTAGCAACGTCACTGCCCGCCC	Total Number of Reads = 3174	Number of Unique Sequences = 64
	CACTAGCCAGGATAGACCGTAGCAACGTCACTGCCCGCCC	2504	0.79	9	0.64	0	0	9	1	0	0	1	1	0	0	2523
	CACTAGCCAGGATAGACCGTAGCAACGTCACTGCCCGCC	248	0.07	3	0.21	0	0	0	0	0	0	0	0	0	0	251
	CACTAGCCAGGATAGACCGTAGCAACGTCACTGCCCCCC	90	0.02	0	0	0	0	0	0	0	0	0	0	0	0	90
	CACTAGCCAGGATAGACCGCAGCAACGTCACTGCCCGCCC	49	0.01	0	0	0	0	0	0	0	0	0	0	0	0	49
	CACTAGCCAGGATAGACCGTAGCAACGTCACTGCCGCC	46	0.01	1	0.07	0	0	0	0	0	0	0	0	0	0	47
	CACTAGCCAGGATAGACCGTAGCAACGTCACTGCCGCCC	24	0	0	0	0	0	0	0	0	0	0	0	0	0	24
	CACTAGCCAGGATAGACCGTAGCAACGTCACTGCCCCCCC	21	0	0	0	0	0	0	0	0	0	0	0	0	0	21
	CACTAGCCAGGATAGACCGTAGCAACGTCACTGCCCCC	21	0	0	0	0	0	0	0	0	0	0	0	0	0	21
	CACTAGCCAGGATAGACCGTAGCAACGTCACTTCCCGCCC	16	0	0	0	0	0	0	0	0	0	0	0	0	0	16
GTGATGTCGTAGGGCCGAACTCATCGTTCCAGGCCCCGTGC	Total Number of Reads = 504064	Number of Unique Sequences = 467
	GTGATGTCGTAGGGCCGAACTCATCGTTCCAGGCCCCGTGC	2579	0.58	560	0.54	4744	0.78	68714	0.91	42029	0.94	174238	0.97	190129	0.97	482993
	TGAGTTTGTAGGGCCGAACTCATCGTTCCAGGCCCCGTGC	265	0.05	50	0.04	155	0.02	881	0.01	349	0	244	0	587	0	2531
GTGAGTGTAGGGCCGAAACTCATCGTTCCAGGCCCCGTGC	Total Number of Reads = 8683	Number of Unique Sequences = 232
	GTGAGTGTAGGGCCGAAACTCATCGTTCCAGGCCCCGTGC	18	0.04	6	0.07	21	0.08	380	0.15	175	0.22	768	0.31	797	0.33	2165
	GAGTGTGTAGGGCCGAAACTCATCGTTCCAGGCCCCGTGC	214	0.57	42	0.49	88	0.34	772	0.32	155	0.19	265	0.1	84	0.03	1620
	GTGAGTGTAGGGCCCGAACTCATCGTTCCAGGCCCCGTGC	14	0.03	2	0.02	15	0.05	221	0.09	104	0.13	400	0.16	432	0.18	1188
	GTGTGTGTAGGGCCGAAACTCATCGTTCCAGGCCCCGTGC	26	0.06	1	0.01	24	0.09	215	0.09	57	0.07	217	0.08	191	0.08	731
	TGAGTGTAGGGCCGAAACTCATCGTTCCAGGCCCCGTGC	24	0.06	15	0.17	41	0.16	219	0.09	59	0.07	140	0.05	207	0.08	705
	GTGAGTGTAGGGGCCGAACTCATCGTTCCAGGCCCCGTGC	2	0	2	0.02	6	0.02	89	0.03	62	0.07	114	0.04	134	0.05	409
	GTGAGTGTAGGGCCGAAGCTCATCGTTCCAGGCCCCGTGC	1	0	0	0	1	0	33	0.01	12	0.01	76	0.03	77	0.03	200
	GTGAGTGTAGGGTCCGAACTCATCGTTCCAGGCCCCGTGC	0	0	0	0	1	0	20	0	9	0.01	37	0.01	38	0.01	105
	TGAGTGTAGGGCCGAAGCTCATCGTTCCAGGCCCCGTGC	3	0	2	0.02	4	0.01	32	0.01	4	0	20	0	23	0	88
	GTGAGTGTAGGGCCTGAACTCATCGTTCCAGGCCCCGTGC	0	0	0	0	0	0	9	0	5	0	21	0	52	0.02	87
	GAGTGTGTAGGGCCGAAGCTCATCGTTCCAGGCCCCGTGC	7	0.01	3	0.03	9	0.03	38	0.01	8	0.01	17	0	4	0	86
	GAGTGCGTAGGGCCGAAACTCATCGTTCCAGGCCCCGTGC	6	0.01	3	0.03	4	0.01	29	0.01	13	0.01	14	0	9	0	78
	TGAGTGTAGGGCCCGAACTCATCGTTCCAGGCCCCGTGC	3	0	0	0	4	0.01	27	0.01	8	0.01	16	0	19	0	77
	GTGAGTGTAGGGCCGAACTTCATCGTTCCAGGCCCCGTGC	0	0	0	0	1	0	16	0	6	0	24	0	28	0.01	75
	GTGAGTGTAGGACGCGAACTCATCGTTCCAGGCCCCGTGC	1	0	0	0	0	0	6	0	7	0	27	0.01	22	0	63
	GTGAGTGTAGGGACCGAACTCATCGTTCCAGGCCCCGTGC	1	0	0	0	1	0	11	0	8	0.01	17	0	17	0	55
	GTGAGTGTAGGGCCGGAACTCATCGTTCCAGGCCCCGTGC	0	0	0	0	1	0	10	0	5	0	18	0	20	0	54
	GTGTGTGTAGGGCCGAAGCTCATCGTTCCAGGCCCCGTGC	1	0	0	0	2	0	12	0	2	0	20	0	13	0	50
	GTGAGTGTAGGGCCGAACATCATCGTTCCAGGCCCCGTGC	0	0	0	0	1	0	13	0	3	0	16	0	13	0	46
	GTGAGTGTAGGGCCGTAACTCATCGTTCCAGGCCCCGTGC	0	0	0	0	0	0	2	0	13	0.01	14	0	15	0	44
GAAGCGAAAACAGGGCGCACCCATCGTGCCAGCCCGTCTG	Total Number of Reads = 2348	Number of Unique Sequences = 82
	GAAGCGAAAACAGGGCGCACCCATCGTGCCAGCCCGTCTG	2044	0.87	13	0.86	1	1	0	0	0	0	0	0	0	0	2058
	GAAGCGAAAACAGGGCGCACCCATCGTGCCAGCCCGTCTGC	52	0.02	0	0	0	0	0	0	0	0	0	0	0	0	52
	GAAGCGAAACAGGGGCGCACCCATCGTGCCAGCCCGTCTG	34	0.01	0	0	0	0	0	0	0	0	0	0	0	0	34
	AAGCGAAAACAGGGCGCACCCATCGTGCCAGCCCGTCTG	26	0.01	0	0	0	0	0	0	0	0	0	0	0	0	26
	GAAGCGAAAACAGGGCGCACCCATCGTGCCACCCCGTCTG	17	0	0	0	0	0	0	0	0	0	0	0	0	0	17
	GAGGCGAAAACAGGGCGCACCCATCGTGCCAGCCCGTCTG	16	0	0	0	0	0	0	0	0	0	0	0	0	0	16
	GGAAGCGAAAACAGGGCGCACCCATCGTGCCAGCCCGTCTG	14	0	1	0.06	0	0	0	0	0	0	0	0	0	0	15
GTGATGTGTAGGCCGAACTCATCGTTCCAGGCCCCGTGC	Total Number of Reads = 3857	Number of Unique Sequences = 131
	GTGATGTGTAGGCCGAACTCATCGTTCCAGGCCCCGTGC	11	0.22	1	0.08	21	0.33	345	0.47	157	0.47	756	0.54	714	0.55	2005
	TGATGTGTAGGCCGAACTCATCGTTCCAGGCCCCGTGC	9	0.18	2	0.16	15	0.23	204	0.28	99	0.29	394	0.28	314	0.24	1037
	GTGATGTGTAGGCGCAACTCATCGTTCCAGGCCCCGTGC	0	0	0	0	0	0	10	0.01	6	0.01	59	0.04	68	0.05	143
	GTGAGTTGTAGGCCGAACTCATCGTTCCAGGCCCCGTGC	5	0.1	4	0.33	7	0.11	42	0.05	10	0.03	18	0.01	34	0.02	120
	GTGATGTGTGGGCCGAACTCATCGTTCCAGGCCCCGTGC	3	0.06	0	0	2	0.03	17	0.02	12	0.03	34	0.02	29	0.02	97
	GTGATGTGAGGGCCGAACTCATCGTTCCAGGCCCCGTGC	0	0	0	0	5	0.07	17	0.02	11	0.03	34	0.02	20	0.01	87
	GTGATGTGTAGGGCGAACTCATCGTTCCAGGCCCCGTGC	0	0	0	0	0	0	11	0.01	5	0.01	25	0.01	35	0.02	76
	AGATGTGTAGGCCGAACTCATCGTTCCAGGCCCCGTGC	2	0.04	2	0.16	1	0.01	14	0.01	2	0	1	0	3	0	25
GGTGCGTAGGGCCGAACTCATCGTTCCAGGCCCCGTGC	Total Number of Reads = 104922	Number of Unique Sequences = 332
	GGTGCGTAGGGCCGAACTCATCGTTCCAGGCCCCGTGC	1329	0.23	764	0.46	2699	0.64	10150	0.7	12791	0.83	31363	0.88	25415	0.89	84511
	GGTGTGTAGGGCCGAACTCATCGTTCCAGGCCCCGTGC	928	0.16	292	0.17	571	0.13	1608	0.11	1011	0.06	933	0.02	353	0.01	5696
	GATGCGTAGGGCCGAACTCATCGTTCCAGGCCCCGTGC	1635	0.28	220	0.13	203	0.04	411	0.02	117	0	146	0	76	0	2808
	AGTGCGTAGGGCCGAACTCATCGTTCCAGGCCCCGTGC	535	0.09	117	0.07	268	0.06	788	0.05	284	0.01	527	0.01	288	0.01	2807
	GGTGCGTAGGGCTGAACTCATCGTTCCAGGCCCCGTGC	98	0.01	12	0	59	0.01	269	0.01	250	0.01	606	0.01	699	0.02	1993
	GGGTGCGTAGGGCCGAACTCATCGTTCCAGGCCCCGTGC	31	0	14	0	58	0.01	225	0.01	276	0.01	550	0.01	635	0.02	1789
	AGTGTGTAGGGCTGAACTCATCGTTCCAGGCCCCGTGC	766	0.13	114	0.06	133	0.03	246	0.01	31	0	12	0	27	0	1329
GGTGTCGGTAGGGCCGAACTCATCGTTCCAGGCCCCGTGC	Total Number of Reads = 48287	Number of Unique Sequences = 449
	GGTGTCGGTAGGGCCGAACTCATCGTTCCAGGCCCCGTGC	249	0.33	138	0.38	518	0.4	1576	0.36	4250	0.45	10547	0.59	7520	0.52	24798
	GGTGTCCGTAGGGCCGAACTCATCGTTCCAGGCCCCGTGC	100	0.13	62	0.17	263	0.2	790	0.18	1117	0.11	2259	0.12	2249	0.15	6840
	GGTGTCGTTAGGGCCGAACTCATCGTTCCAGGCCCCGTGC	57	0.07	29	0.08	132	0.1	448	0.1	500	0.05	1457	0.08	1622	0.11	4245
	GGTGTCAGTAGGGCCGAACTCATCGTTCCAGGCCCCGTGC	24	0.03	11	0.03	59	0.04	256	0.05	391	0.04	1179	0.06	866	0.06	2786
	GGTGTCGGTAGGGCCGAACCCATCGTTCCAGGCCCCGTGC	2	0	1	0	3	0	22	0	1849	0.19	40	0	36	0	1953
	GGTGTCGCTAGGGCCGAACTCATCGTTCCAGGCCCCGTGC	38	0.05	22	0.06	67	0.05	316	0.07	246	0.02	608	0.03	645	0.04	1942
	GGTGTACGTAGGGCCGAACTCATCGTTCCAGGCCCCGTGC	25	0.03	8	0.02	48	0.03	222	0.05	171	0.01	589	0.03	474	0.03	1537
	GGGTGTCGGTAGGGCCGAACTCATCGTTCCAGGCCCCGTGC	22	0.03	8	0.02	20	0.01	50	0.01	196	0.02	339	0.01	249	0.01	884
	GAGTGTCGGTAGGGCCGAACTCATCGTTCCAGGCCCCGTGC	33	0.04	11	0.03	33	0.02	120	0.02	87	0	65	0	27	0	376
	GTGTCGGTAGGGCCGAACTCATCGTTCCAGGCCCCGTGC	3	0	4	0.01	6	0	35	0	37	0	138	0	125	0	348
GGTGTCGTAGGGCCGAACTCATCGTTCCAGGCCCCGTCGC	Total Number of Reads = 45699	Number of Unique Sequences = 618
	GGTGTCGTAGGGCCGAACTCATCGTTCCAGGCCCCGTCGC	226	0.01	124	0.04	481	0.11	1740	0.19	2039	0.61	5032	0.84	4629	0.83	14271
	AGTGTTGTAGGGCCGAACTCATCGTTCCAGGCCCCGTGCC	4470	0.3	1124	0.42	1764	0.4	2602	0.28	294	0.08	142	0.02	81	0.01	10477
	AGTGTTGTAGGGCCGAACTCATCGTTCCAGGCCCCGTCC	1378	0.09	229	0.08	359	0.08	718	0.07	106	0.03	53	0	38	0	2881
	AGTGTTGTAGGGCCGAACTCATCGTTCCAGGCCCCGTCGC	841	0.05	170	0.06	302	0.06	458	0.05	87	0.02	41	0	30	0	1929
	AGTGTTGTAGGGCCGAACTCATCGTTCCAGGCCCCGGTGC	888	0.06	137	0.05	166	0.03	323	0.03	27	0	23	0	17	0	1581
	TGAGTTGTAGGGCCGAACTCATCGTTCCAGGCCCCGTCGC	111	0	25	0	83	0.01	412	0.04	187	0.05	227	0.03	391	0.07	1436
	AGTGTTGTAGGGCCGAACTCATCGTTCCAGGCCCCGTAGC	588	0.04	152	0.05	180	0.04	363	0.03	43	0.01	19	0	12	0	1357
	AGTGTTGTAGGGCCGAACTCATCGTTCCAGGCCCCGTGGC	518	0.03	137	0.05	190	0.04	292	0.03	43	0.01	21	0	12	0	1213
	AGTGTTGTAGGGCCGAACTCATCGTTCCAGGCCCCGTCG	489	0.03	72	0.02	109	0.02	333	0.03	24	0	23	0	12	0	1062
	AGTGTTGTAGGGCCGAACTCATCGTTCCAGGCCCCGTGTC	614	0.04	55	0.02	62	0.01	245	0.02	16	0	13	0	4	0	1009
	AGTGTTGTAGGGCCGAACTCATCGTTCCAGGCCCCGTCCG	578	0.03	14	0	39	0	151	0.01	9	0	5	0	8	0	804
	AGTGTTGTAGGGCCGAACTCATCGTTCCAGGCCCCGTCCC	611	0.04	23	0	53	0.01	58	0	28	0	1	0	3	0	777
	AGTGTTGTAGGGCCGAACTCATCGTTCCAGGCCCCGTGG	258	0.01	53	0.01	31	0	133	0.01	16	0	13	0	8	0	512
	AGTGTTGTAGGGCCGAACTCATCGTTCCAGGCCCCGCCCC	410	0.02	3	0	14	0	19	0	5	0	0	0	0	0	451
	AGTGTTGTAGGGCCGAACTCATCGTTCCAGGCCCCGCCG	406	0.02	1	0	7	0	30	0	2	0	1	0	0	0	447
	AGTGTTGTAGGGCCGAACTCATCGTTCCAGGCCCCGTTGC	146	0	35	0.01	42	0	77	0	15	0	4	0	8	0	327
	AGTGTTGTAGGGCCGAACTCATCGTTCCAGGCCCCGTC	127	0	10	0	15	0	105	0.01	31	0	20	0	5	0	313
	AGTGTTGTAGGGCCGAACTCATCGTTCCAGGCCCCGTGCCC	165	0.01	19	0	28	0	36	0	8	0	1	0	0	0	257
	AGTGTTGTAGGGCCGAACTCATCGTTCCAGGCCCCGTACC	120	0	21	0	40	0	38	0	11	0	2	0	2	0	234
	GTGTCGTAGGGCCGAACTCATCGTTCCAGGCCCCGTCGC	3	0	5	0	6	0	33	0	30	0	87	0.01	66	0.01	230
GTGTGTGTAGGGCCGAACTCATCGTTCCCAGGCCCCGTGC	Total Number of Reads = 9416	Number of Unique Sequences = 287
	GTGTGTGTAGGGCCGAACTCATCGTTCCCAGGCCCCGTGC	31	0.02	18	0.03	48	0.05	557	0.21	113	0.11	386	0.26	578	0.3	1731
	AGTGTGTAGGGCCGAACTCATCGTTCCCAGGCCCCGTGC	491	0.42	206	0.4	358	0.4	448	0.17	101	0.1	49	0.03	34	0.01	1687
	TGAGTGTAGGGCCGAACTCATCGTTCCCAGGCCCCGTGC	40	0.03	35	0.06	98	0.11	299	0.11	226	0.22	198	0.13	420	0.22	1316
	GAGTGTGTAGGGCCGAACTCATCGTTCCCAGGCCCCGTGC	118	0.1	65	0.12	118	0.13	390	0.15	117	0.11	103	0.07	78	0.04	989
	GGTGCGTAGGGCCGAACTCATCGTTCCCAGGCCCCGTGC	10	0	15	0.02	35	0.03	81	0.03	158	0.15	301	0.2	346	0.18	946
	GGTGCGTAGGGCCGAACTCATCGTTGCCAGGCCCCGTGC	9	0	4	0	19	0.02	57	0.02	77	0.07	167	0.11	137	0.07	470
	AGTGTGTAGGGCCGAACTCATCGTTCCAAGGCCCCGTGC	72	0.06	17	0.03	26	0.02	86	0.03	6	0	9	0	3	0	219
	GAGTGTGTAGGGCCGAACTCATCGTTCCAAGGCCCCGTGC	36	0.03	6	0.01	15	0.01	88	0.03	24	0.02	30	0.02	11	0	210
	AGTGTGTAGGGCCGAACTCATCGTTGCCAGGCCCCGTGC	66	0.05	41	0.08	29	0.03	62	0.02	3	0	7	0	2	0	210
	AGTGTGTAGGGCCGAACTCATCGATTCCAGGCCCCGTGC	65	0.05	16	0.03	21	0.02	54	0.02	3	0	6	0	0	0	165
	GTGCGTAGGGCCGAACTCATCGTTCCCAGGCCCCGTGC	0	0	1	0	2	0	6	0	13	0.01	32	0.02	36	0.01	90
	GGTGCGTAGGGCCGAACTCATCGTTTCCAGGCCCCGTGC	0	0	2	0	0	0	8	0	12	0.01	24	0.01	41	0.02	87
	GAGTGTGTAGGGCCGAACTCATCGTTTCCAGGCCCCGTGC	10	0	1	0	6	0	38	0.01	6	0	7	0	4	0	72
	GAGTGTGTAGGGCCGAACTCATCGTTGCCAGGCCCCGTGC	11	0	7	0.01	4	0	34	0.01	3	0	10	0	1	0	70
	ATGTGTGTAGGGCCGAACTCATCGTTCCCAGGCCCCGTGC	11	0	7	0.01	11	0.01	26	0.01	9	0	5	0	1	0	70
	AGTGTGTAGGGCCGAACTCATCGGTTCCAGGCCCCGTGC	27	0.02	9	0.01	5	0	13	0	6	0	2	0	1	0	63
	AGTGTGTAGGGCCGAACTCATCGTTCCAGGGCCCCGTGC	21	0.01	6	0.01	6	0	14	0	3	0	2	0	1	0	53
	AGAGTGTAGGGCCGAACTCATCGTTCCCAGGCCCCGTGC	5	0	2	0	9	0.01	13	0	9	0	6	0	5	0	49
TGAGTTGTAGGGCCGAACTCATCGTTCCAGGCCCCGTGC	Total Number of Reads = 4600559	Number of Unique Sequences = 385
	TGAGTTGTAGGGCCGAACTCATCGTTCCAGGCCCCGTGC	346076	0.97	109005	0.98	338990	0.98	1470228	0.98	505870	0.99	678872	0.99	1101045	0.99	4550086
GGTGTCGTAGGCCGAACTCATCGTTCCAGGCCCCCGTGC	Total Number of Reads = 6272	Number of Unique Sequences = 335
	GGTGTCGTAGGCCGAACTCATCGTTCCAGGCCCCCGTGC	38	0.05	15	0.09	62	0.14	247	0.22	237	0.34	440	0.3	595	0.33	1634
	AGTGTTGTAGGCCGAACTCATCGTTCCAGGCCCCCGTGC	479	0.71	94	0.57	196	0.46	267	0.23	15	0.02	10	0	9	0	1070
	GGTGTCGTAGGCCGAACTCATCGTTCCAAGGCCCCGTGC	15	0.02	8	0.04	17	0.04	57	0.05	89	0.12	160	0.11	217	0.12	563
	GGTGTCGTAGGCCGAACTCATCGTTCCAGGCCCCGGTGC	4	0	0	0	7	0.01	50	0.04	36	0.05	90	0.06	99	0.05	286
	GGTGTCGTAGGGCGAACTCATCGTTCCAGGCCCCCGTGC	6	0	2	0.01	7	0.01	43	0.03	24	0.03	59	0.04	103	0.05	244
	GGTGTCGTAGGCCGAACTCATCGTTCCAGGCCCCAGTGC	5	0	1	0	11	0.02	37	0.03	37	0.05	75	0.05	78	0.04	244
	GGTGTCGTAGGCCGAACTCATCGTTCCAGGCCCCTGTGC	1	0	3	0.01	4	0	25	0.02	14	0.02	39	0.02	66	0.03	152
	GTGTCGTAGGCCGAACTCATCGTTCCAGGCCCCCGTGC	2	0	1	0	2	0	18	0.01	17	0.02	41	0.02	48	0.02	129
	GGTGTCGTAGGGCGAACTCATCGTTCCAGGCCCCGGTGC	2	0	0	0	5	0.01	26	0.02	11	0.01	30	0.02	40	0.02	114
	GGTGTCGTAGGGCCAACTCATCGTTCCAGGCCCCCGTGC	3	0	1	0	2	0	20	0.01	16	0.02	25	0.01	46	0.02	113
	GGTGTCGTAGGCCGAACTCATCGTTCCAGGGCCCCGTGC	2	0	1	0	5	0.01	21	0.01	10	0.01	33	0.02	33	0.01	105
	GGTGTCGAGGGCCGAACTCATCGTTCCAGGCCCCCGTGC	1	0	1	0	6	0.01	18	0.01	17	0.02	28	0.01	33	0.01	104
	GTGTCGTAGGCCGAACTCATCGTTCCAAGGCCCCGTGC	2	0	1	0	3	0	4	0	11	0.01	30	0.02	29	0.01	80
	GGTGTCGTAGGGCGAACTCATCGTTCCAGGCCCCAGTGC	3	0	1	0	4	0	17	0.01	6	0	21	0.01	24	0.01	76
	GTGTCGTAGGCCGAACTCATCGTTCCAGGCCCCAGTGC	0	0	1	0	3	0	9	0	9	0.01	20	0.01	24	0.01	66
	GGGTGTCGTAGGCCGAACTCATCGTTCCAGGCCCCCGTGC	2	0	0	0	5	0.01	7	0	5	0	13	0	18	0.01	50
	GGTGTCGTAGGCCGAACTCATCGTTCCAGGCCCCGTTGC	1	0	0	0	4	0	5	0	9	0.01	14	0	15	0	48
	GTGTCGTAGGCCGAACTCATCGTTCCAGGCCCCGGTGC	0	0	0	0	3	0	6	0	12	0.01	16	0.01	10	0	47
	GGTGTCGTAGGGCGAACTCATCGTTCCAGGGCCCCGTGC	0	0	0	0	3	0	6	0	6	0	13	0	19	0.01	47
	GGTGTCGTAGGGCGAACTCATCGTTCCAGGCCCCTGTGC	1	0	1	0	0	0	9	0	4	0	8	0	22	0.01	45
	AGTGTTGTAGGCCGAACTCATCGTTCCAGGGCCCCGTGC	14	0.02	4	0.02	7	0.01	13	0.01	0	0	2	0	0	0	40
	GGTGTTGTAGGGCGAACTCATCGTTCCAGGCCCCCGTGC	6	0	2	0.01	3	0	11	0	4	0	3	0	3	0	32
	GGTGTCGTAGGCCGAACTCATCGTTCCAGGCCCCTGCG	0	0	0	0	0	0	4	0	1	0	15	0.01	12	0	32
GGGTGTCGTAGGGCCGAACTCATCGTTCCAGGCCCCGTGT	Total Number of Reads = 11429	Number of Unique Sequences = 382
	GGGTGTCGTAGGGCCGAACTCATCGTTCCAGGCCCCGTGT	180	0.16	65	0.3	190	0.33	840	0.24	846	0.38	344	0.15	289	0.16	2754
	GGGTGTCGTAGGGCCGAACTCATCGTTCCAGGCCCCGTG	76	0.07	25	0.11	75	0.13	314	0.09	264	0.12	401	0.18	354	0.2	1509
	GAGTGTCGTAGGGCCGAACTCATCGTTCCAGGCCCCGTG	244	0.22	16	0.07	71	0.12	551	0.15	170	0.07	128	0.05	43	0.02	1223
	GTGAGTCGTAGGGCCGAACTCATCGTTCCAGGCCCCGTG	20	0.01	1	0	12	0.02	175	0.05	97	0.04	337	0.15	257	0.14	899
	GTGTGTCGTAGGGCCGAACTCATCGTTCCAGGCCCCGTG	45	0.04	4	0.01	8	0.01	212	0.06	38	0.01	187	0.08	93	0.05	587
	GAGTGTCGTAGGGCCGAACTCATCGTTCCAGGCCCCGTGT	88	0.08	14	0.06	32	0.05	210	0.06	92	0.04	20	0	7	0	463
	GGGTGTCGTAGGGCCGAACTCATCGTTCCAGGCCCCGTCG	6	0	3	0.01	6	0.01	61	0.01	68	0.03	140	0.06	130	0.07	414
	GGGTGTCGTAGGGCCGAACTCATCGTTCCAGGCCCCGTGGC	5	0	9	0.04	12	0.02	40	0.01	45	0.02	56	0.02	81	0.04	248
	GGGTGTCGTAGGGCCGAACTCATCGTTCCAGGCCCCGTGA	4	0	0	0	5	0	98	0.02	76	0.03	35	0.01	16	0	234
	GAGTGTTGTAGGGCCGAACTCATCGTTCCAGGCCCCGTGT	103	0.09	16	0.07	18	0.03	56	0.01	11	0	3	0	0	0	207
	GGGTGTCGTAGGGCCGAACTCATCGTTCCAGGCCCCGTGTC	1	0	1	0	3	0	53	0.01	35	0.01	35	0.01	49	0.02	177
	GAGTGTCGTAGGGCCGAACTCATCGTTCCAGGCCCCGTA	30	0.02	3	0.01	13	0.02	67	0.01	24	0.01	20	0	8	0	165
	GGTGGTCGTAGGGCCGAACTCATCGTTCCAGGCCCCGTG	5	0	2	0	3	0	22	0	28	0.01	56	0.02	40	0.02	156
	GGGTGTCGTAGGGCCGAACTCATCGTTCCAGGCCCCGTA	4	0	4	0.01	5	0	44	0.01	28	0.01	36	0.01	34	0.01	155
	GGATGTCGTAGGGCCGAACTCATCGTTCCAGGCCCCGTG	1	0	2	0	10	0.01	26	0	21	0	66	0.02	25	0.01	151
	GTGTGTCGTAGGGCCGAACTCATCGTTCCAGGCCCCGTGT	9	0	0	0	3	0	64	0.01	19	0	14	0	13	0	122
	GGGTGTCGTAGGGCCGAACTCATCGTTCCAGGCCCCGTC	2	0	2	0	1	0	15	0	25	0.01	22	0	47	0.02	114
	GGATGTCGTAGGGCCGAACTCATCGTTCCAGGCCCCGTGT	1	0	0	0	3	0	42	0.01	26	0.01	12	0	5	0	89
	GAGTGTTGTAGGGCCGAACTCATCGTTCCAGGCCCCGTG	40	0.03	8	0.03	6	0.01	30	0	3	0	1	0	1	0	89
	GGGTGTTGTAGGGCCGAACTCATCGTTCCAGGCCCCGTGT	18	0.01	4	0.01	9	0.01	22	0	21	0	8	0	4	0	86
	GTGTGTCGTAGGGCCGAACTCATCGTTCCAGGCCCCGTA	6	0	1	0	4	0	27	0	14	0	13	0	8	0	73
	GGGTGTCGTAGGGCCGAACTCATCGTTCCAGGCCCCGTGG	1	0	0	0	1	0	17	0	15	0	13	0	22	0.01	69
	GGTGTGTCGTAGGGCCGAACTCATCGTTCCAGGCCCCGTG	1	0	1	0	3	0	21	0	16	0	15	0	8	0	65
	GGTGGTCGTAGGGCCGAACTCATCGTTCCAGGCCCCGTGT	3	0	2	0	5	0	17	0	17	0	8	0	7	0	59
GGTGTCGTAGGGCCGAACCTCATCGTCCCAGGCCCGTGC	Total Number of Reads = 4669	Number of Unique Sequences = 169
	GGTGTCGTAGGGCCGAACCTCATCGTCCCAGGCCCGTGC	20	0.17	9	0.17	43	0.26	164	0.29	179	0.29	585	0.34	484	0.32	1484
	GGTGTCGTAGGGCCGAAACTCATCGTTCCAGGCCCGTGC	30	0.25	14	0.26	48	0.3	131	0.23	228	0.36	498	0.29	450	0.3	1399
	GGTGTCGTAGGGCCGAACCTCATCGTCCCAGGCCCGTCG	3	0.02	2	0.03	6	0.03	40	0.07	14	0.02	133	0.07	135	0.09	333
	GGTGTCGTAGGGCCGAACCTCATCGTCCCAGGCCCGTCGC	1	0	2	0.03	4	0.02	24	0.04	40	0.06	117	0.06	110	0.07	298
	GGTGTCGTAGGGCCGAACATCATCGTTCCAGGCCCGTGC	4	0.03	3	0.05	9	0.05	22	0.03	15	0.02	48	0.02	55	0.03	156
	GGTGTCGTAGGGCCGAACCTCATCGTCCCAGGCCCGTG	3	0.02	1	0.01	4	0.02	21	0.03	7	0.01	46	0.02	44	0.02	126
	GGTGTCGTAGGGCCGAAGCTCATCGTTCCAGGCCCGTGC	0	0	2	0.03	6	0.03	14	0.02	33	0.05	36	0.02	27	0.01	118
	GGTGTCGTAGGGCCGAACCTCATCGTTCCAGGCCCGTGC	3	0.02	1	0.01	4	0.02	11	0.02	14	0.02	31	0.01	18	0.01	82
	GGTGTCGTAGGGCCGAACTTCATCGTTCCAGGCCCGTGC	3	0.02	1	0.01	3	0.01	9	0.01	7	0.01	24	0.01	23	0.01	70
	GGGTGTCGTAGGGCCGAACCTCATCGTCCCAGGCCCGTGC	3	0.02	0	0	2	0.01	11	0.02	5	0	6	0	15	0.01	42
	GTGTCGTAGGGCCGAACCTCATCGTCCCAGGCCCGTGC	1	0	0	0	0	0	17	0.03	2	0	11	0	9	0	40
	GGTGTCGTAGGGCCGAAACTCATCGTTCCAGGCCCGTG	1	0	2	0.03	0	0	7	0.01	3	0	19	0.01	4	0	36
	GGTGTCGTAGGGCCGAACCTCATCTTCCCAGGCCCGTGC	0	0	0	0	0	0	3	0	12	0.01	11	0	9	0	35
	AGTGTTGTAGGGCCGAACCTCATCGTCCCAGGCCCGTGC	17	0.14	3	0.05	4	0.02	6	0.01	0	0	0	0	0	0	30
	GGTGTCGTAGGGCCGAACCCCATCGTTCCAGGCCCCTGC	2	0.01	2	0.03	3	0.01	3	0	8	0.01	2	0	6	0	26
GTGATGTGTAGGGCCGAAACTCATCGTTCCAGGCCCCGTGC	Total Number of Reads = 3232	Number of Unique Sequences = 135
	GTGATGTGTAGGGCCGAAACTCATCGTTCCAGGCCCCGTGC	14	0.18	2	0.09	7	0.12	204	0.34	125	0.42	524	0.51	581	0.49	1457
	GTGAGTTGTAGGGCCGAAACTCATCGTTCCAGGCCCCGTGC	27	0.36	11	0.52	28	0.49	99	0.16	43	0.14	81	0.07	161	0.13	450
	GTGATGTGTAGGGCCCGAACTCATCGTTCCAGGCCCCGTGC	1	0.01	0	0	8	0.14	65	0.11	27	0.09	157	0.15	133	0.11	391
	GTGATGTGTAGGGCCGAACATCATCGTTCCAGGCCCCGTGC	1	0.01	1	0.04	3	0.05	44	0.07	21	0.07	65	0.06	63	0.05	198
	GTGATGTGTAGGGGCCGAACTCATCGTTCCAGGCCCCGTGC	1	0.01	0	0	2	0.03	46	0.07	25	0.08	38	0.03	45	0.03	157
	GTGATGTGTAGGGTCCGAACTCATCGTTCCAGGCCCCGTGC	0	0	0	0	0	0	7	0.01	7	0.02	17	0.01	26	0.02	57
	GTGATGTGTAGGGCCGGAACTCATCGTTCCAGGCCCCGTGC	1	0.01	0	0	0	0	11	0.01	2	0	11	0.01	26	0.02	51
	GTGATGTGTAGGGCCGAACTTCATCGTTCCAGGCCCCGTGC	1	0.01	0	0	0	0	8	0.01	4	0.01	8	0	18	0.01	39
	TGATGTGTAGGGCCGAAACTCATCGTTCCAGGCCCCGTGC	2	0.02	0	0	3	0.05	11	0.01	3	0.01	7	0	8	0	34
	GTGATGTGTAGGGACCGAACTCATCGTTCCAGGCCCCGTGC	0	0	0	0	0	0	7	0.01	3	0.01	9	0	14	0.01	33
	GAGAGTTGTAGGGCCGAAACTCATCGTTCCAGGCCCCGTGC	7	0.09	1	0.04	2	0.03	5	0	4	0.01	4	0	1	0	24
	GAGATGTGTAGGGCCGAAACTCATCGTTCCAGGCCCCGTGC	3	0.04	0	0	0	0	7	0.01	5	0.01	4	0	2	0	21
	GTGATGTGTAGGGCCGAACTCCATCGTTCCAGGCCCCGTGC	0	0	0	0	0	0	3	0	1	0	6	0	7	0	17
	GTGATGTGTAGGGCCGAAACTCATCGTTCCAGGCCCCGTGCC	0	0	0	0	0	0	3	0	4	0.01	4	0	6	0	17
GTGATGTGTAGGGCCGAACTCATCGTTCCAGGCCCGTGC	Total Number of Reads = 2989	Number of Unique Sequences = 134
	GTGATGTGTAGGGCCGAACTCATCGTTCCAGGCCCGTGC	7	0.07	2	0.2	11	0.16	222	0.34	124	0.42	516	0.54	463	0.5	1345
	GTGATGTGTAGGGCCGAACTCATCGTTCCAGGCCCCTGCG	3	0.03	0	0	8	0.12	132	0.2	32	0.1	158	0.16	181	0.19	514
	GTGAGTTGTAGGGCCGAACTCATCGTTCCAGGCCCGTGC	13	0.13	4	0.4	15	0.22	62	0.09	27	0.09	49	0.05	51	0.05	221
	ATGAGTTGTAGGGCCGAACTCATCGTTCCAGGCCCGTGC	52	0.54	3	0.3	13	0.19	88	0.13	15	0.05	17	0.01	19	0.02	207
	TGATGTGTAGGGCCGAACTCATCGTTCCAGGCCCGTGC	1	0.01	0	0	0	0	27	0.04	16	0.05	44	0.04	38	0.04	126
	GTGATGTGTAGGGCCGAACTCATCGTTCCAGCCCCGTGC	1	0.01	0	0	4	0.06	14	0.02	18	0.06	25	0.02	25	0.02	87
	GTGATGTGTAGGGCCGAACTCATCGTTCCAGGCCCCTG	1	0.01	0	0	1	0.01	12	0.01	15	0.05	13	0.01	36	0.03	78
	GTGATGTGTAGGGCCGAACTCATCGTTCAGGCCCCGTGC	1	0.01	0	0	2	0.03	16	0.02	2	0	26	0.02	25	0.02	72
	GTGATGTGTAGGGCCGAACTCATCGTTCCAGGCCCGTGCC	0	0	0	0	1	0.01	6	0	3	0.01	12	0.01	6	0	28
	GTGATGTGTAGGGCCGAACTCATCGTCCCAGGCCCGTGC	0	0	0	0	0	0	3	0	3	0.01	10	0.01	3	0	19
	GTGATGTGTAGGGCCGAACTCATCGTTCCAGGCCCGTGT	0	0	0	0	1	0.01	2	0	4	0.01	5	0	4	0	16
	GTGATGTGTAGGGCCGAACTCATCGTTCCAGGCCCGTG	1	0.01	0	0	0	0	5	0	0	0	6	0	3	0	15
GTCGACCATCCACTGCGGAACATGTTATATGTAGCCGCCC	Total Number of Reads = 1564	Number of Unique Sequences = 35
	GTCGACCATCCACTGCGGAACATGTTATATGTAGCCGCCC	1286	0.82	4	1	0	0	0	0	0	0	0	0	0	0	1290
	GTCGACCATCCACTGCGGAACATGTTATATGTAGCCGCC	73	0.04	0	0	0	0	0	0	0	0	0	0	0	0	73
	GTCGACCATCCACTGCGGAACATGTTATATGTAGCCCGCCC	52	0.03	0	0	0	0	0	0	0	0	0	0	0	0	52
	TCGACCATCCACTGCGGAACATGTTATATGTAGCCGCCC	40	0.02	0	0	0	0	0	0	0	0	0	0	0	0	40
	GTCGACCATCCACTGCGGAACATGTTATATGTAGCCGCCCC	30	0.01	0	0	0	0	0	0	0	0	0	0	0	0	30
	GTCGACCATCCACTGCAGAACATGTTATATGTAGCCGCCC	14	0	0	0	0	0	0	0	0	0	0	0	0	0	14
	GTTGACCATCCACTGCGGAACATGTTATATGTAGCCGCCC	10	0	0	0	0	0	0	0	0	0	0	0	0	0	10
	GTCGACCATCCACTGCGGAACATGTTATATGTAACCGCCC	8	0	0	0	0	0	0	0	0	0	0	0	0	0	8
TGAGTTGTAGGGCCGAACTCATCGTTCCAAGCCCCGTGC	Total Number of Reads = 5240	Number of Unique Sequences = 237
	TGAGTTGTAGGGCCGAACTCATCGTTCCAAGCCCCGTGC	104	0.1	31	0.08	109	0.19	454	0.33	132	0.25	219	0.39	312	0.33	1361
	TGAGTTGTAGGGCCGAACTCATCGTTCCCAGGCCCGTGC	68	0.06	25	0.06	93	0.17	234	0.17	221	0.42	156	0.28	309	0.33	1106
	AGTGTTGTAGGGCCGAACTCATCGTTCCCAGGCCCGTGC	415	0.42	123	0.32	197	0.36	214	0.15	46	0.08	18	0.03	13	0.01	1026
	AGTGTTGTAGGGCCGAACTCATCGTTGCCAGGCCCGTGC	145	0.14	118	0.31	45	0.08	88	0.06	13	0.02	4	0	2	0	415
	TGAGTTGTAGGGCCGAACTCATCGTTGCCAGGCCCGTGC	19	0.01	20	0.05	23	0.04	87	0.06	18	0.03	32	0.05	82	0.08	281
	AGAGTTGTAGGGCCGAACTCATCGTTCCAAGCCCCGTGC	12	0.01	2	0	2	0	31	0.02	1	0	8	0.01	4	0	60
	AGAGTTGTAGGGCCGAACTCATCGTTCCCAGGCCCGTGC	9	0	0	0	8	0.01	8	0	6	0.01	6	0.01	1	0	38
	AGTGTTGTAGGGCCGAACTCATCGTTCCAAGGCCCGTGC	21	0.02	2	0	5	0	9	0	1	0	0	0	0	0	38
	GAGTGTTGTAGGGCCGAACTCATCGTTCCCAGGCCCGTGC	20	0.02	3	0	6	0.01	6	0	2	0	0	0	0	0	37
	TGAGTTGTAGGGCCGAACTCATCGTTCCAAGGCCCGTGC	0	0	0	0	1	0	12	0	2	0	6	0.01	9	0	30
	TGAGTTGTAGGGCCGAACTCATCGTTCCAGGGCCCGTGC	1	0	0	0	1	0	3	0	1	0	7	0.01	15	0.01	28
	GTGTGTCGTAGGGCCGAACTCATCGTTCCCAGGCCCGTGC	0	0	0	0	0	0	17	0.01	1	0	4	0	5	0	27
GGTGTCGTAGGGCCGAAACTCATCGTTCCCAGGCCCCGTGC	Total Number of Reads = 5495	Number of Unique Sequences = 325
	GGTGTCGTAGGGCCGAAACTCATCGTTCCCAGGCCCCGTGC	22	0.02	24	0.05	60	0.12	153	0.16	269	0.47	591	0.69	692	0.59	1811
	AGTGTTGTAGGGCCGAAACTCATCGTTCCCAGGCCCCGTGC	419	0.39	133	0.31	187	0.38	199	0.21	62	0.1	15	0.01	20	0.01	1035
	TGAGTTGTAGGGCCGAAACTCATCGTTCCCAGGCCCCGTGC	40	0.03	17	0.03	46	0.09	143	0.15	110	0.19	103	0.12	240	0.2	699
	AGTGTTGTAGGGCCGAAACTCATCGTTCCAAGGCCCCGTGC	112	0.1	26	0.06	28	0.05	56	0.06	4	0	4	0	1	0	231
	AGTGTTGTAGGGCCGAAACTCATCGTTGCCAGGCCCCGTGC	66	0.06	88	0.2	7	0.01	25	0.02	4	0	0	0	2	0	192
	AGTGTTGTAGGGCCGAACCTCATCGTTCCCAGGCCCCGTGC	51	0.04	20	0.04	26	0.05	33	0.03	4	0	1	0	1	0	136
	TGAGTTGTAGGGCCGAAACTCATCGTTCCAAGGCCCCGTGC	11	0.01	1	0	3	0	22	0.02	3	0	11	0.01	31	0.02	82
	AGTGTTGTAGGGCCGAAACTCATCGTTTCCAGGCCCCGTGC	31	0.02	9	0.02	6	0.01	13	0.01	4	0	1	0	5	0	69
	AGTGTTGTAGGGCCGAAACTCATCGATTCCAGGCCCCGTGC	21	0.01	7	0.01	9	0.01	12	0.01	1	0	2	0	0	0	52
	AGTGTTGTAGGGCCGAAACTCATCGGTTCCAGGCCCCGTGC	24	0.02	3	0	6	0.01	6	0	2	0	2	0	1	0	44
	AGTGTTGTAGGGCCGAAACTCATCGTTCCAGGGCCCCGTGC	17	0.01	4	0	4	0	14	0.01	4	0	0	0	1	0	44
	GAGTGTTGTAGGGCCGAAACTCATCGTTCCCAGGCCCCGTGC	13	0.01	7	0.01	7	0.01	11	0.01	1	0	1	0	2	0	42
	TGAGTTGTAGGGCCGAAACTCATCGTTGCCAGGCCCCGTGC	4	0	5	0.01	2	0	10	0.01	2	0	5	0	12	0.01	40
	AGAGTTGTAGGGCCGAAACTCATCGTTCCCAGGCCCCGTGC	8	0	1	0	8	0.01	11	0.01	5	0	1	0	3	0	37
	GTGAGTTGTAGGGCCGAAACTCATCGTTCCCAGGCCCCGTGC	1	0	0	0	2	0	6	0	0	0	10	0.01	17	0.01	36
	AGTGTTGTAGGGCCCGAACTCATCGTTCCCAGGCCCCGTGC	10	0	4	0	5	0.01	8	0	1	0	0	0	0	0	28
AGTGTGTAGGCGGCAACTCATCGTTCCAGGCCCCGTGC	Total Number of Reads = 3358	Number of Unique Sequences = 157
	AGTGTGTAGGCGGCAACTCATCGTTCCAGGCCCCGTGC	566	0.4	50	0.22	94	0.25	267	0.26	25	0.21	9	0.07	3	0.02	1014
	AGTGTGTAGGCCGGAACTCATCGTTCCAGGCCCCGTGC	278	0.19	78	0.35	84	0.23	161	0.15	22	0.18	6	0.05	9	0.07	638
	AGTGTGTGGACGGCAACTCATCGTTCCAGGCCCCGTGC	260	0.18	49	0.22	86	0.23	135	0.13	10	0.08	2	0.01	4	0.03	546
	TGAGTGTAGGCGGCAACTCATCGTTCCAGGCCCCGTGC	39	0.02	6	0.02	32	0.08	196	0.19	24	0.2	44	0.37	68	0.6	409
	AGTGTCTAGGCGGCAACTCATCGTTCCAGGCCCCGTGC	28	0.02	5	0.02	9	0.02	19	0.01	0	0	0	0	0	0	61
	AGTGTGTAGGCCGAAACTCATCGTTCCAGGCCCCGTGC	22	0.01	5	0.02	3	0	20	0.01	1	0	1	0	0	0	52
	GAGTGTGTAGGACGCAACTCATCGTTCCAGGCCCCGTGC	4	0	0	0	2	0	15	0.01	0	0	14	0.11	7	0.06	42
	AGTGTGTAGGCGTGAACTCATCGTTCCAGGCCCCGTGC	30	0.02	1	0	2	0	4	0	2	0.01	0	0	0	0	39
	GAGTGCGTAGGCGGCAACTCATCGTTCCAGGCCCCGTGC	3	0	2	0	3	0	15	0.01	8	0.06	6	0.05	0	0	37
	TGAGTCTAGGCGGCAACTCATCGTTCCAGGCCCCGTGC	1	0	2	0	2	0	19	0.01	0	0	3	0.02	7	0.06	34
	AGTGCGTAGGCGGCAACTCATCGTTCCAGGCCCCGTGC	17	0.01	2	0	2	0	11	0.01	0	0	2	0.01	0	0	34
	AGTGTGTAGGACGCAACTCATCGTTCCAGGCCCCGTGC	11	0	2	0	7	0.01	6	0	0	0	1	0	0	0	27
	GGTGTCTAGGCGGCAACTCATCGTTCCAGGCCCCGTGC	2	0	0	0	0	0	18	0.01	0	0	1	0	1	0	22
	GTGTGCGTAGGCGGCAACTCATCGTTCCAGGCCCCGTGC	1	0	0	0	2	0	7	0	4	0.03	5	0.04	1	0	20
	GAGTGTGTAGGCGCGAACTCATCGTTCCAGGCCCCGTGC	2	0	1	0	1	0	8	0	2	0.01	3	0.02	1	0	18
GGTGTCGTAGGGCCGAACCTCATTCCTGCCCAGGCCGCG	Total Number of Reads = 1727	Number of Unique Sequences = 84
	GGTGTCGTAGGGCCGAACCTCATTCCTGCCCAGGCCGCG	3	0.07	0	0	9	0.42	77	0.4	61	0.53	471	0.62	377	0.61	998
	GGTGTCGTAGGGCCGAACCTCATCCGTGCCCAGGCCGCG	2	0.04	2	0.33	2	0.09	13	0.06	26	0.23	123	0.16	80	0.13	248
	GGTGTCGTAGGGCCGAACCTCGTTCCTGCCCAGGCCGCG	0	0	0	0	0	0	18	0.09	0	0	44	0.05	46	0.07	108
	GGTGTCGTAGGGCCGAACCTCGATCCTGCCCAGGCCGCG	1	0.02	0	0	0	0	4	0.02	0	0	27	0.03	32	0.05	64
	AGTGTTGTAGGGCCGAACCTCATTCCTGCCCAGGCCGCG	19	0.46	3	0.5	3	0.14	28	0.14	0	0	0	0	0	0	53
	TGAGTTGTAGGGCCGAACCTCATTCCTGCCCAGGCCGCG	3	0.07	0	0	2	0.09	15	0.07	1	0	11	0.01	11	0.01	43
	GGTGTCGTAGGGCCGAACCTCATTCCTGCCCGGCCCGCG	0	0	0	0	0	0	0	0	2	0.01	9	0.01	6	0	17
	GGGTGTCGTAGGGCCGAACCTCATTCCTGCCCAGGCCGCG	0	0	1	0.16	0	0	0	0	2	0.01	3	0	9	0.01	15
	GGTGTCGTAGGGCCGAACCTCATCCATGCCCAGGCCGCG	0	0	0	0	0	0	0	0	5	0.04	7	0	2	0	14
	GGTGTCGTAGGGCCGAACCTCATTCGTGCCCAGGCCGCG	0	0	0	0	0	0	1	0	0	0	6	0	5	0	12
	GGTGTCGTAGGGCCGAACCTCATTCCTGCCCCGGCCGCG	0	0	0	0	0	0	0	0	2	0.01	3	0	6	0	11
	AGTGTTGTAGGGCCGAACCTCGATCCTGCCCAGGCCGCG	4	0.09	0	0	1	0.04	6	0.03	0	0	0	0	0	0	11
	GTGAGTCGTAGGGCCGAACCTCATTCCTGCCCAGGCCGCG	0	0	0	0	1	0.04	1	0	0	0	4	0	3	0	9
	GAGTGTCGTAGGGCCGAACCTCATTCCTGCCCAGGCCGCG	0	0	0	0	0	0	4	0.02	0	0	3	0	2	0	9
GTGATGTCGTAGGGCCGAACTCATCGTTCCCAGGCCCCGTGC	Total Number of Reads = 2529	Number of Unique Sequences = 124
	GTGATGTCGTAGGGCCGAACTCATCGTTCCCAGGCCCCGTGC	3	0.04	1	0.04	7	0.08	92	0.21	95	0.28	303	0.41	419	0.49	920
	GATGTCGTAGGGCCGAACTCATCGTTCCCAGGCCCCGTGC	6	0.08	10	0.4	25	0.28	68	0.15	74	0.22	95	0.12	87	0.1	365
	TGATGTTGTAGGGCCGAACTCATCGTTCCCAGGCCCCGTGC	18	0.26	0	0	16	0.18	85	0.19	15	0.04	13	0.01	19	0.02	166
	GTGATGTGGTAGGGCCGAACTCATCGTTCCCAGGCCCCGTGC	2	0.02	0	0	2	0.02	16	0.03	20	0.05	50	0.06	65	0.07	155
	GATGTGTCGTAGGGCCGAACTCATCGTTCCCAGGCCCCGTGC	5	0.07	0	0	7	0.08	43	0.09	25	0.07	26	0.03	10	0.01	116
	GTGATGTCGTAGGGCCGAACTCATCGGTTCCAGGCCCCGTGC	2	0.02	0	0	0	0	9	0.02	16	0.04	37	0.05	35	0.04	99
	GGATGTCGTAGGGCCGAACTCATCGTTCCCAGGCCCCGTGC	2	0.02	3	0.12	4	0.04	6	0.01	15	0.04	28	0.03	18	0.02	76
	GTGATGTCGTAGGGCCGAACTCATCGTTCCAAGGCCCCGTGC	0	0	0	0	1	0.01	18	0.04	3	0	23	0.03	26	0.03	71
	GGATGTCGTAGGGCCGAACTCATCGTTCCAAGGCCCCGTGC	0	0	0	0	1	0.01	8	0.01	10	0.02	14	0.01	13	0.01	46
	GTGATGTCGTAGGGCCGAACTCATCGTTTCCAGGCCCCGTGC	1	0.01	0	0	0	0	6	0.01	5	0.01	19	0.02	14	0.01	45
	GTGATGTCGTAGGGCCGAACTCATCGTTCCAGGGCCCCGTGC	0	0	0	0	0	0	1	0	1	0	20	0.02	19	0.02	41
	GTGATGTTGTAGGGCCGAACTCATCGTTCCCAGGCCCCGTGC	2	0.02	0	0	6	0.06	15	0.03	4	0.01	4	0	6	0	37
	ATGATGTTGTAGGGCCGAACTCATCGTTCCCAGGCCCCGTGC	5	0.07	1	0.04	4	0.04	14	0.03	7	0.02	4	0	2	0	37
	GTGATGTCGTAGGGCCGAACTCATCGATTCCAGGCCCCGTGC	0	0	0	0	1	0.01	3	0	2	0	17	0.02	12	0.01	35
	GTGAGTTCGTAGGGCCGAACTCATCGTTCCCAGGCCCCGTGC	0	0	0	0	5	0.05	3	0	5	0.01	10	0.01	11	0.01	34
	GATGTCGTAGGGCCGAACTCATCGTTGCCAGGCCCCGTGC	1	0.01	9	0.36	1	0.01	3	0	3	0	6	0	6	0	29
	GGATGTCGTAGGGCCGAACTCATCGTTTCCAGGCCCCGTGC	0	0	0	0	0	0	1	0	4	0.01	3	0	7	0	15
	GGGTGGTCGTAGGGCCGAACTCATCGTTCCCAGGCCCCGTGC	1	0.01	0	0	0	0	0	0	2	0	3	0	7	0	13
	GATGTGTCGTAGGGCCGAACTCATCGTTCCAAGGCCCCGTGC	3	0.04	0	0	0	0	8	0.01	0	0	2	0	0	0	13
	GGTTGTCGTAGGGCCGAACTCATCGTTCCCAGGCCCCGTGC	0	0	0	0	1	0.01	1	0	1	0	3	0	7	0	13
AGTGTTGTAGGGCCGAACTCAATCGTTCCAGGCCCCGTGC	Total Number of Reads = 7756	Number of Unique Sequences = 291
	AGTGTTGTAGGGCCGAACTCAATCGTTCCAGGCCCCGTGC	803	0.56	213	0.57	298	0.41	364	0.17	88	0.12	25	0.02	28	0.01	1819
	TGAGTTGTAGGGCCGAACTCATCCGTTCCAGGCCCCGTGC	90	0.06	23	0.06	123	0.17	443	0.21	152	0.22	228	0.26	533	0.32	1592
	TGAGTTGTAGGGCCGAACTCAATCGTTCCAGGCCCCGTGC	68	0.04	16	0.04	60	0.08	243	0.11	134	0.19	101	0.11	285	0.17	907
	TGAGTTGTAGGGCCGAACTCATTCGTTCCAGGCCCCGTGC	86	0.06	28	0.07	45	0.06	262	0.12	67	0.09	119	0.14	228	0.13	835
	TGAGTTGTAGGGCCGAACTCGATCGTTCCAGGCCCCGTGC	34	0.02	15	0.04	42	0.05	114	0.05	41	0.06	76	0.08	154	0.09	476
	TGAGTTGTAGGGCCGAACTTCATCGTTCCAGGCCCCGTGC	35	0.02	7	0.01	27	0.03	135	0.06	39	0.05	49	0.05	117	0.07	409
	GGTGTTGTAGGGCCGAACTCAATCGTTCCAGGCCCCGTGC	40	0.02	20	0.05	53	0.07	124	0.05	55	0.08	68	0.08	42	0.02	402
	GTGAGTCGTAGGGCCGAACTCATTCGTTCCAGGCCCCGTGC	18	0.01	0	0	2	0	60	0.02	9	0.01	47	0.05	45	0.02	181
	TGAGTTGTAGGGCCGAACTCCATCGTTCCAGGCCCCGTGC	12	0	3	0	14	0.01	47	0.02	11	0.01	25	0.02	46	0.02	158
	TGAGTTGTAGGGCCGAACCCCATCGTTCCAGGCCCCGTGC	7	0	1	0	6	0	24	0.01	5	0	2	0	14	0	59
	AGAGTTGTAGGGCCGAACTCATTCGTTCCAGGCCCCGTGC	15	0.01	7	0.01	2	0	20	0	2	0	1	0	2	0	49
	GGAGTTGTAGGGCCGAACTCAATCGTTCCAGGCCCCGTGC	0	0	0	0	1	0	5	0	4	0	14	0.01	15	0	39
	AGAGTTGTAGGGCCGAACTCAATCGTTCCAGGCCCCGTGC	17	0.01	3	0	1	0	11	0	3	0	1	0	3	0	39
TCTGGCTGAGATGGCGTTGCATTATATCGCCGGGCCCCCC	Total Number of Reads = 1110	Number of Unique Sequences = 29
	TCTGGCTGAGATGGCGTTGCATTATATCGCCGGGCCCCCC	859	0.79	7	0.87	0	0	14	0.82	1	1	0	0	1	1	882
	TCTGGCTGAGATGGCGTTGCATTATATCGCCGGGCCCCCCC	133	0.12	0	0	0	0	0	0	0	0	0	0	0	0	133
	TCTGGCTGAGATGGCGTTGCATTATATCGCCGGGCCCCC	44	0.04	1	0.12	0	0	2	0.11	0	0	0	0	0	0	47
	TCTGGGCTGAGATGGCGTTGCATTATATCGCCGGGCCCCCC	10	0	0	0	0	0	0	0	0	0	0	0	0	0	10
GAAGCGAAAACAGGGCGCACCCCATCGTGCCAGCCCCGTCTG	Total Number of Reads = 1066	Number of Unique Sequences = 46
	GAAGCGAAAACAGGGCGCACCCCATCGTGCCAGCCCCGTCTG	861	0.81	2	1	1	1	1	0.5	0	0	0	0	0	0	865
	GAAGCGAAAACAGGGCGCACCCAATCGTGCCAGCCCCGTCTG	66	0.06	0	0	0	0	1	0.5	0	0	0	0	0	0	67
	GAAGCGAAAACAGGGCGCCACCCATCGTGCCAGCCCCGTCTG	34	0.03	0	0	0	0	0	0	0	0	0	0	0	0	34
	GAAGCGAAACAGGGGCGCACCCCATCGTGCCAGCCCCGTCTG	26	0.02	0	0	0	0	0	0	0	0	0	0	0	0	26
GGTGTCGTAGGGCCGAACCTCATCCTGCCCAGGCCGCG	Total Number of Reads = 1974	Number of Unique Sequences = 99
	GGTGTCGTAGGGCCGAACCTCATCCTGCCCAGGCCGCG	0	0	1	0.16	4	0.22	42	0.24	98	0.53	410	0.44	267	0.4	822
	GGTGTCGTAGGGCCGAACCTCTTCCTGCCCAGGCCGCG	1	0.05	0	0	4	0.22	63	0.36	14	0.07	257	0.28	207	0.31	546
	GGTGTCGTAGGGCCGAACCTCGTCCTGCCCAGGCCGCG	0	0	0	0	0	0	3	0.01	3	0.01	30	0.03	29	0.04	65
	GGTGTCGTAGGGCCGAACCTCATTCTGCCCAGGCCGCG	0	0	0	0	1	0.05	5	0.02	0	0	34	0.03	17	0.02	57
	GGTGTCGTAGGGCCGAACCTCATCCTGCCCGGCCTGCG	0	0	0	0	0	0	0	0	28	0.15	15	0.01	5	0	48
	GGTGTCGTAGGGCCGAACCTCATCGTGCCCAGGCCGCG	0	0	0	0	0	0	4	0.02	4	0.02	23	0.02	16	0.02	47
	GGTGTCGTAGGGCCGAACCTCGTCCTGCCCAGCCTGCG	0	0	0	0	0	0	0	0	5	0.02	23	0.02	19	0.02	47
	GGTGTCGTAGGGCCGAACCTCATCCTGCCCGGCCCGCG	0	0	0	0	0	0	1	0	5	0.02	12	0.01	11	0.01	29
	AGTGTTGTAGGGCCGAACCTCATCCTGCCCAGGCCGCG	8	0.44	3	0.5	3	0.16	8	0.04	0	0	2	0	0	0	24
	GGGTGTCGTAGGGCCGAACCTCATCCTGCCCAGGCCGCG	0	0	0	0	0	0	1	0	3	0.01	9	0	6	0	19
	GGTGTCGTAGGGCCGAACCTCATCCTGCCCAGCCTGCG	0	0	0	0	0	0	0	0	6	0.03	4	0	6	0	16
	GGGTGTCGTAGGGCCGAACCTCTTCCTGCCCAGGCCGCG	0	0	0	0	1	0.05	2	0.01	0	0	4	0	8	0.01	15
	GGTGTCGTAGGGCCGAACCTCTCCATGCCCAGGCCGCG	0	0	0	0	1	0.05	1	0	0	0	7	0	5	0	14
	TGAGTTGTAGGGCCGAACCTCATCCTGCCCAGGCCGCG	1	0.05	0	0	0	0	3	0.01	0	0	5	0	4	0	13
	GAGTGTCGTAGGGCCGAACCTCATCCTGCCCAGGCCGCG	0	0	1	0.16	0	0	5	0.02	2	0.01	3	0	2	0	13
	GGTGTCGTAGGGCCGAACCTCTTCATGCCCAGGCCGCG	0	0	0	0	0	0	5	0.02	0	0	3	0	5	0	13
	GGTGTCGTAGGGCCGAACCTCTCGATGCCCAGGCCGCG	0	0	0	0	0	0	1	0	0	0	6	0	6	0	13
	GGTGTCGTAGGGCCGAACCTCTTCGTGCCCAGGCCGCG	0	0	0	0	0	0	3	0.01	0	0	4	0	3	0	10
AGTGTTGTAGGCCGAACTCATCGTTCCCAGGCCCCGTGC	Total Number of Reads = 3110	Number of Unique Sequences = 181
	AGTGTTGTAGGCCGAACTCATCGTTCCCAGGCCCCGTGC	429	0.62	119	0.64	214	0.56	231	0.28	43	0.16	16	0.06	24	0.04	1076
	TGAGTTGTAGGCCGAACTCATCGTTCCCAGGCCCCGTGC	37	0.05	21	0.11	64	0.16	205	0.24	115	0.43	89	0.38	242	0.45	773
	TGAGTTGTAGGGCCAACTCATCGTTCCCAGGCCCCGTGC	10	0.01	3	0.01	11	0.02	65	0.07	29	0.11	24	0.1	55	0.1	197
	AGTGTTGTAGGCCGAACTCATCGTTCCAAGGCCCCGTGC	61	0.08	9	0.04	19	0.04	45	0.05	4	0.01	3	0.01	3	0	144
	TGAGTTGAGGGCCGAACTCATCGTTCCCAGGCCCCGTGC	3	0	1	0	11	0.02	30	0.03	6	0.02	11	0.04	33	0.06	95
	TGAGTTGTAGGCCGAACTCATCGTTCCAAGGCCCCGTGC	7	0.01	5	0.02	4	0.01	27	0.03	7	0.02	9	0.03	32	0.05	91
	TGAGTTGTAGGCCGAACTCATCGTTGCCAGGCCCCGTGC	5	0	2	0.01	1	0	22	0.02	5	0.01	10	0.04	14	0.02	59
	AGTGTTGTAGGCCGAACTCATCGATTCCAGGCCCCGTGC	28	0.04	3	0.01	11	0.02	13	0.01	0	0	1	0	2	0	58
	TGAGTTGTAGGCCGAACTCATCGATTCCAGGCCCCGTGC	2	0	1	0	7	0.01	16	0.01	6	0.02	7	0.03	13	0.02	52
	TGAGTTGTAGGCCGAACTCATCGGTTCCAGGCCCCGTGC	2	0	1	0	0	0	5	0	11	0.04	9	0.03	10	0.01	38
	TGAGTTGTGGGCCGAACTCATCGTTCCCAGGCCCCGTGC	6	0	2	0.01	3	0	10	0.01	2	0	1	0	5	0	29
	TGAGTTGTAGGGCGAACTCATCGTTCCCAGGCCCCGTGC	0	0	0	0	1	0	6	0	4	0.01	6	0.02	11	0.02	28
	TGAGTTGTAGGCCGAACTCATCCGTTCCAGGCCCCGTGC	1	0	1	0	2	0	9	0.01	1	0	2	0	11	0.02	27
	TGAGTTGTAGGGCCAACTCATCGTTGCCAGGCCCCGTGC	4	0	0	0	2	0	7	0	1	0	4	0.01	8	0.01	26
	TGAGTTGTAGGCCGAACTCATCGTTCCAGGGCCCCGTGC	1	0	1	0	1	0	12	0.01	0	0	2	0	8	0.01	25
	GAGTGTTGTAGGCCGAACTCATCGTTCCCAGGCCCCGTGC	11	0.01	1	0	5	0.01	5	0	0	0	0	0	1	0	23
	AGTGTTGTAGGCCGAACTCATCGTTTCCAGGCCCCGTGC	8	0.01	1	0	3	0	4	0	1	0	1	0	0	0	18
	AGAGTTGTAGGCCGAACTCATCGTTCCCAGGCCCCGTGC	5	0	0	0	2	0	6	0	1	0	2	0	2	0	18
GGTGCGTAGGGGCCGAACTCATCGTTCCAGGCCCCGTGC	Total Number of Reads = 2765	Number of Unique Sequences = 180
	GGTGCGTAGGGGCCGAACTCATCGTTCCAGGCCCCGTGC	4	0.01	4	0.04	22	0.11	114	0.2	94	0.3	231	0.35	227	0.34	696
	AGTGTGTAAGGGCCGAACTCATCGTTCCAGGCCCCGTGC	181	0.58	41	0.47	63	0.32	121	0.21	20	0.06	18	0.02	3	0	447
	GGTGCGTAAGGGCCGAACTCATCGTTCCAGGCCCCGTGC	5	0.01	7	0.08	14	0.07	53	0.09	43	0.13	121	0.18	113	0.17	356
	AGTGTGTAGGGGCCGAACTCATCGTTCCAGGCCCCGTGC	69	0.22	20	0.22	33	0.17	111	0.19	5	0.01	1	0	2	0	241
	GGTGCGTTAGGGCCGAACTCATCGTTCCAGGCCCCGTGC	3	0	1	0.01	8	0.04	11	0.01	18	0.05	35	0.05	64	0.09	140
	GGTGCGTAGGGCCGGAACTCATCGTTCCAGGCCCCGTGC	4	0.01	1	0.01	4	0.02	16	0.02	19	0.06	41	0.06	45	0.06	130
	GGTGCGTAGGGACCGAACTCATCGTTCCAGGCCCCGTGC	2	0	0	0	3	0.01	10	0.01	11	0.03	31	0.04	24	0.03	81
	GGTGCGTAGGGCCCGAACTCATCGTTCCAGGCCCCGTGC	1	0	1	0.01	1	0	5	0	6	0.01	26	0.04	21	0.03	61
	TGAGTGTAGGGGCCGAACTCATCGTTCCAGGCCCCGTGC	0	0	0	0	5	0.02	27	0.04	8	0.02	11	0.01	8	0.01	59
	GGTGCGTAGGGTCCGAACTCATCGTTCCAGGCCCCGTGC	4	0.01	0	0	1	0	4	0	8	0.02	15	0.02	24	0.03	56
	GGGTGCGTAGGGGCCGAACTCATCGTTCCAGGCCCCGTGC	1	0	0	0	0	0	10	0.01	4	0.01	7	0.01	15	0.02	37
	GGTGTGTAGGGGCCGAACTCATCGTTCCAGGCCCCGTGC	4	0.01	0	0	1	0	6	0.01	7	0.02	0	0	1	0	19
	GGGTGCGTAAGGGCCGAACTCATCGTTCCAGGCCCCGTGC	0	0	0	0	0	0	1	0	3	0	7	0.01	8	0.01	19
	GAGTGCGTAGGGGCCGAACTCATCGTTCCAGGCCCCGTGC	1	0	0	0	0	0	6	0.01	3	0	4	0	1	0	15
	GAGTGCGTTAGGGCCGAACTCATCGTTCCAGGCCCCGTGC	0	0	1	0.01	1	0	7	0.01	2	0	1	0	2	0	14
	GAGTGCGTAAGGGCCGAACTCATCGTTCCAGGCCCCGTGC	0	0	0	0	2	0.01	5	0	1	0	6	0	0	0	14
GAAGCGAAACAGGGCGCACCCCATCGTGCCAGCCCCGTCTG	Total Number of Reads = 1161	Number of Unique Sequences = 83
	GAAGCGAAACAGGGCGCACCCCATCGTGCCAGCCCCGTCTG	670	0.58	7	0.77	0	0	0	0	0	0	0	0	0	0	677
	GAAGCGAAACAGGGCGCACCCAATCGTGCCAGCCCCGTCTG	163	0.14	0	0	0	0	0	0	0	0	0	0	0	0	163
	GAAGCGAAACAGGGCGACACCCATCGTGCCAGCCCCGTCTG	60	0.05	0	0	0	0	0	0	0	0	0	0	0	0	60
	GAAGCGAAACAGGGCGCCACCCATCGTGCCAGCCCCGTCTG	58	0.05	0	0	0	0	1	1	0	0	0	0	0	0	59
	GAAGCGAAACAGGGCGCACCCATCCGTGCCAGCCCCGTCTG	42	0.03	0	0	0	0	0	0	0	0	0	0	0	0	42
	GAACCGAAACAGGGCGCACCCCATCGTGCCAGCCCCGTCTG	15	0.01	0	0	0	0	0	0	0	0	0	0	0	0	15
	GAAGCGAAACAGGGCGCACCCGATCGTGCCAGCCCCGTCTG	13	0.01	1	0.11	0	0	0	0	0	0	0	0	0	0	14
	GAAGCGAAACAGGGCGCACCCATTCGTGCCAGCCCCGTCTG	10	0	0	0	0	0	0	0	0	0	0	0	0	0	10
	GGAAGCGAAACAGGGCGACACCCATCGTGCCAGCCCCGTCTG	8	0	0	0	0	0	0	0	0	0	0	0	0	0	8
	GAAGCGAAACAGGGCGCACCCATCCGTGCCAGCCCCGTCTGC	6	0	0	0	0	0	0	0	0	0	0	0	0	0	6
	GAAGCGAAACAGGGCGCACCCGATCGTGCCAGCCCCGTCTGC	5	0	1	0.11	0	0	0	0	0	0	0	0	0	0	6
GGGTGTCGTAGGGGCCGAAACTCATCGTTCCAGGCCCCGTGC	Total Number of Reads = 3153	Number of Unique Sequences = 229
	GGGTGTCGTAGGGGCCGAAACTCATCGTTCCAGGCCCCGTGC	19	0.13	12	0.19	23	0.19	75	0.18	122	0.23	197	0.21	200	0.2	648
	GGGTGTCGTAGGGGCCCGAACTCATCGTTCCAGGCCCCGTGC	12	0.08	7	0.11	17	0.14	50	0.12	84	0.15	143	0.15	129	0.13	442
	GGGTGTCGTAGGGCCCGAAACTCATCGTTCCAGGCCCCGTGC	4	0.02	4	0.06	10	0.08	44	0.1	70	0.13	131	0.14	102	0.1	365
	GGTGTCGTAGGGGCCGAAACTCATCGTTCCAGGCCCCGTGC	4	0.02	5	0.07	9	0.07	38	0.09	49	0.09	109	0.11	123	0.12	337
	GGTGTCGTAGGGCCCGAAACTCATCGTTCCAGGCCCCGTGC	6	0.04	4	0.06	5	0.04	27	0.06	45	0.08	112	0.12	105	0.1	304
	GGTGTCGTAAGGGCCGAAACTCATCGTTCCAGGCCCCGTGC	4	0.02	3	0.04	10	0.08	35	0.08	35	0.06	73	0.07	88	0.09	248
	GAGTGTTGTAGGGGCCGAAACTCATCGTTCCAGGCCCCGTGC	23	0.16	9	0.14	6	0.05	17	0.04	3	0	2	0	2	0	62
	GGTGTCGTAGGGACCGAAACTCATCGTTCCAGGCCCCGTGC	0	0	1	0.01	3	0.02	5	0.01	12	0.02	21	0.02	17	0.01	59
	GAGTGTTGTAGGGCCCGAAACTCATCGTTCCAGGCCCCGTGC	17	0.11	5	0.07	9	0.07	9	0.02	0	0	4	0	0	0	44
	GGGTGTCGTAAGGGCCGAAACTCATCGTTCCAGGCCCCGTGC	1	0	1	0.01	2	0.01	9	0.02	5	0	6	0	14	0.01	38
	GGGTGTCGTAGGGCCGGAAACTCATCGTTCCAGGCCCCGTGC	1	0	1	0.01	0	0	3	0	6	0.01	7	0	14	0.01	32
	GGGTGTTGTAGGGGCCGAAACTCATCGTTCCAGGCCCCGTGC	2	0.01	1	0.01	4	0.03	2	0	11	0.02	0	0	4	0	24
	GGGTGTCGTAAGGGCCGGAACTCATCGTTCCAGGCCCCGTGC	0	0	0	0	2	0.01	5	0.01	4	0	4	0	8	0	23
	GGTGTTGTAGGGGCCGAAACTCATCGTTCCAGGCCCCGTGC	4	0.02	0	0	0	0	3	0	13	0.02	2	0	1	0	23
	GGTGTCGTACGGGCCGAAGCTCATCGTTCCAGGCCCCGTGC	0	0	0	0	2	0.01	1	0	5	0	7	0	7	0	22
	GGGTGTCGTTAGGGCCGAAACTCATCGTTCCAGGCCCCGTGC	0	0	1	0.01	0	0	2	0	1	0	6	0	10	0.01	20
	GGATGTCGTAAGGGCCGGAACTCATCGTTCCAGGCCCCGTGC	0	0	1	0.01	0	0	2	0	5	0	3	0	6	0	17
	GGTGTCGTAGGGTCCGAAACTCATCGTTCCAGGCCCCGTGC	0	0	0	0	2	0.01	2	0	2	0	4	0	7	0	17
GAAGCGAAAACAGGGGCGCACCCATCGTGCCAGCCCCGTCTG	Total Number of Reads = 771	Number of Unique Sequences = 45
	GAAGCGAAAACAGGGGCGCACCCATCGTGCCAGCCCCGTCTG	643	0.83	3	0.6	0	0	0	0	0	0	0	0	0	0	646
	GAAGCGAAAACAGGGGCGCACTCATCGTGCCAGCCCCGTCTG	33	0.04	0	0	0	0	0	0	0	0	0	0	0	0	33
	GAAGCGAAAACGAGGGCGCACCCATCGTGCCAGCCCCGTCTG	24	0.03	0	0	0	0	0	0	0	0	0	0	0	0	24
	GAAGCGAAACGACGGGCGCACCCATCGTGCCAGCCCCGTCTG	6	0	0	0	0	0	0	0	0	0	0	0	0	0	6
	GAAGCGAAAAACAGGGCGCACCCATCGTGCCAGCCCCGTCTG	4	0	0	0	0	0	0	0	0	0	0	0	0	0	4
	GAGGCGAAAACAGGGGCGCACCCATCGTGCCAGCCCCGTCTG	4	0	0	0	0	0	0	0	0	0	0	0	0	0	4
GGTGTCGTAGGGCCGAACCTCATTCCTGCCCGGCCGCG	Total Number of Reads = 1600	Number of Unique Sequences = 87
	GGTGTCGTAGGGCCGAACCTCATTCCTGCCCGGCCGCG	1	0.04	1	0.16	2	0.09	38	0.29	102	0.49	241	0.38	258	0.43	643
	GGTGTCGTAGGGCCGAACCTCATTCCTGCCCAGCCGCG	0	0	1	0.16	1	0.04	9	0.06	14	0.06	66	0.1	66	0.11	157
	GGTGTCGTAGGGCCGAACCTCATCCGTGCCCGGCCGCG	0	0	0	0	1	0.04	8	0.06	23	0.11	70	0.11	50	0.08	152
	GGTGTCGTAGGGCCGAACCTCATTCCTGCCCGGCCGTCG	0	0	0	0	0	0	9	0.06	21	0.1	47	0.07	40	0.06	117
	GGTGTCGTAGGGCCGAACCTCGTTCCTGCCCAGCCGCG	0	0	0	0	4	0.18	14	0.1	3	0.01	50	0.08	36	0.06	107
	GGTGTCGTAGGGCCGAACCTCGATCCTGCCCAGCCGCG	0	0	0	0	3	0.13	1	0	7	0.03	32	0.05	34	0.05	77
	GGTGTCGTAGGGCCGAACCTCATTCCTGCCCGCCGTCG	0	0	0	0	1	0.04	4	0.03	11	0.05	24	0.03	25	0.04	65
	GGTGTCGTAGGGCCGAACCTCATCCATGCCCGGCCGCG	0	0	0	0	0	0	0	0	9	0.04	24	0.03	11	0.01	44
	AGTGTTGTAGGGCCGAACCTCATTCCTGCCCGGCCGCG	11	0.5	2	0.33	3	0.13	8	0.06	1	0	0	0	0	0	25
	AGTGTTGTAGGGCCGAACCTCATTCCTGCCCAGCCGCG	5	0.22	1	0.16	2	0.09	10	0.07	0	0	1	0	0	0	19
	GGTGTCGTAGGGCCGAACCTCATTCGTGCCCGGCCGCG	0	0	0	0	0	0	0	0	1	0	6	0	6	0.01	13
	GGTGTCGTAGGGCCGAACCTCTTCCGTGCCCGGCCGCG	0	0	0	0	0	0	0	0	0	0	9	0.01	4	0	13
	GGTGTCGTAGGGCCGAACCTCGTTCCTGCCCGGCCGCG	0	0	0	0	0	0	0	0	0	0	5	0	8	0.01	13
	GGTGTCGTAGGGCCGAACCTCATTCCTGCCCGCCTGCG	0	0	0	0	0	0	0	0	3	0.01	5	0	4	0	12
	GGGTGTCGTAGGGCCGAACCTCATTCCTGCCCGGCCGCG	0	0	0	0	0	0	1	0	2	0	4	0	3	0	10
	GGTGTCGTAGGGCCGAACCTCGATTCTGCCCAGCCGCG	0	0	0	0	0	0	0	0	0	0	4	0	4	0	8
	GGTGTCGTAGGGCCGAACCTCGATCCTGCCCGGCCGCG	0	0	0	0	0	0	0	0	1	0	3	0	4	0	8
GTGAGTGTAGGGCCGAACTCATCTTCCAGGCCCCGTGC	Total Number of Reads = 2102	Number of Unique Sequences = 80
	GTGAGTGTAGGGCCGAACTCATCTTCCAGGCCCCGTGC	3	0.04	1	0.1	6	0.18	97	0.18	36	0.23	243	0.36	253	0.39	639
	GTGAGTGTAGGGCCGAACTCATCGTCCAGGCCCCGTGC	2	0.02	1	0.1	6	0.18	66	0.12	36	0.23	132	0.19	139	0.21	382
	GTGTGTGTAGGGCCGAACTCATCTTCCAGGCCCCGTGC	5	0.07	1	0.1	5	0.15	85	0.16	13	0.08	101	0.14	86	0.13	296
	GAGTGTGTAGGGCCGAACTCATCTTCCAGGCCCCGTGC	31	0.46	5	0.5	9	0.27	120	0.23	18	0.11	34	0.05	12	0.01	229
	GTGAGTGTAGGGCCGAACTCATCGTTCAGGCCCCGTGC	2	0.02	0	0	0	0	27	0.05	6	0.03	45	0.06	39	0.06	119
	GTGTGTGTAGGGCCGAACTCATCGTCCAGGCCCCGTGC	2	0.02	1	0.1	1	0.03	19	0.03	16	0.1	32	0.04	26	0.04	97
	GTGAGTGTAGGGCCGAACTCACGTTCCAGGCCCCGTGC	0	0	0	0	0	0	15	0.02	6	0.03	24	0.03	35	0.05	80
	GTGAGTGTAGGGCCGAACTCATGTTCCAGGCCCCGTGC	4	0.05	0	0	0	0	19	0.03	6	0.03	17	0.02	25	0.03	71
	GTGTGTGTAGGGCCGAACTCATGTTCCAGGCCCCGTGC	7	0.1	0	0	0	0	5	0	1	0	1	0	4	0	18
	GTGTGCGTAGGGCCGAACTCATCTTCCAGGCCCCGTGC	0	0	0	0	3	0.09	10	0.01	1	0	1	0	2	0	17
	ATGTGTGTAGGGCCGAACTCATCGTCCAGGCCCCGTGC	4	0.05	0	0	1	0.03	7	0.01	0	0	3	0	1	0	16
	GGTGTGTGTAGGGCCGAACTCATCTTCCAGGCCCCGTGC	1	0.01	0	0	0	0	6	0.01	2	0.01	2	0	3	0	14
	GTGATCGTAGGGCCGAACTCATCTTCCAGGCCCCGTGC	0	0	0	0	0	0	2	0	0	0	7	0.01	3	0	12
GGTGTCGTAGGGCCGAACCTCATTCCGTGCCCAGGCCCGTCG	Total Number of Reads = 849	Number of Unique Sequences = 35
	GGTGTCGTAGGGCCGAACCTCATTCCGTGCCCAGGCCCGTCG	0	0	1	0.5	6	0.4	57	0.68	8	0.34	266	0.72	245	0.7	583
	GGTGTCGTAGGGCCGAACCTCATCCGTTGCCCAGGCCCGTCG	1	0.12	0	0	6	0.4	12	0.14	7	0.3	36	0.09	54	0.15	116
	GGTGTCGTAGGGCCGAACCTCATCCGATGCCCAGGCCCGTCG	0	0	0	0	0	0	4	0.04	1	0.04	19	0.05	14	0.04	38
	GGTGTCGTAGGGCCGAACCTCTTCCGATGCCCAGGCCCGTCG	0	0	0	0	2	0.13	0	0	0	0	8	0.02	4	0.01	14
	GGTGTCGTAGGGCCGAACCTCATTCCGTGCCCAGGCCTGTCG	0	0	0	0	0	0	1	0.01	2	0.08	5	0.01	4	0.01	12
	AGTGTTGTAGGGCCGAACCTCATTCCGTGCCCAGGCCCGTCG	7	0.87	0	0	1	0.06	1	0.01	0	0	0	0	0	0	9
	GTGTCGTAGGGCCGAACCTCATTCCGTGCCCAGGCCCGTCG	0	0	0	0	0	0	4	0.04	1	0.04	2	0	1	0	8
	GGTGTCGTAGGGCCGAACCTCATTCCGTGCCCAGGCCCGTG	0	0	0	0	0	0	0	0	0	0	5	0.01	2	0	7
	GGTGTCGTAGGGCCGAACCTCATTCCATGCCCAGGCCTGTCG	0	0	0	0	0	0	0	0	1	0.04	5	0.01	1	0	7
	GGTGTCGTAGGGCCGAACCTCATTCCGTGCCCAGGCCCTGCG	0	0	0	0	0	0	0	0	0	0	3	0	3	0	6
	GGTGTCGTAGGGCCGAACCTCATTCCATGCCCAGGCCCGTCG	0	0	0	0	0	0	1	0.01	0	0	3	0	2	0	6
	GGTGTCGTAGGGCCGAACCTCGATCCGTGCCCAGGCCCGTGC	0	0	0	0	0	0	0	0	0	0	3	0	2	0	5
GGTGTCGTAGGGCCGAACCTCATCCGTGCCCAGGCCCGTCG	Total Number of Reads = 1316	Number of Unique Sequences = 92
	GGTGTCGTAGGGCCGAACCTCATCCGTGCCCAGGCCCGTCG	1	0.07	0	0	6	0.3	34	0.3	28	0.21	321	0.52	185	0.43	575
	GGTGTCGTAGGGCCGAACCTCATCCGTGCCCAGGCCTGTCG	0	0	0	0	0	0	4	0.03	23	0.17	30	0.04	33	0.07	90
	GGTGTCGTAGGGCCGAACCTCATTCCTGCCCAGGCCCGTCG	0	0	0	0	1	0.05	7	0.06	5	0.03	35	0.05	38	0.08	86
	GGTGTCGTAGGGCCGAACCTCATCCGTGCCCAGGCCCGTCGC	0	0	0	0	2	0.1	6	0.05	16	0.12	37	0.06	21	0.04	82
	GGTGTCGTAGGGCCGAACCTCATTCGTGCCCAGGCCCGTCG	0	0	0	0	1	0.05	2	0.01	0	0	36	0.05	16	0.03	55
	GGTGTCGTAGGGCCGAACCTCATCGTTGCCCAGGCCCGTCG	0	0	1	0.33	1	0.05	7	0.06	1	0	26	0.04	18	0.04	54
	GGTGTCGTAGGGCCGAACCTCATCCGTTCCCAGGCCCGTGC	0	0	0	0	1	0.05	1	0	19	0.14	11	0.01	17	0.04	49
	GGTGTCGTAGGGCCGAACCTCATCGTTGCCCAGGCCCGTCGC	0	0	0	0	0	0	3	0.02	3	0.02	9	0.01	9	0.02	24
	GGTGTCGTAGGGCCGAACCTCATCCATGCCCAGGCCTGTCG	0	0	0	0	0	0	0	0	4	0.03	9	0.01	5	0.01	18
	GGTGTCGTAGGGCCGAACCTCATCCGTGCCCAGGCCCGTGC	1	0.07	0	0	0	0	2	0.01	3	0.02	10	0.01	2	0	18
	GGTGTCGTAGGGCCGAACCTCATTCGTTCCCAGGCCCGTGC	0	0	0	0	0	0	2	0.01	2	0.01	4	0	10	0.02	18
	GGTGTCGTAGGGCCGAACCTCATCCGTGCCCAGGCCCTGCG	0	0	0	0	0	0	1	0	2	0.01	11	0.01	4	0	18
	GGGTGTCGTAGGGCCGAACCTCATCCGTGCCCAGGCCCGTCG	0	0	0	0	0	0	4	0.03	1	0	3	0	6	0.01	14
	GTGTCGTAGGGCCGAACCTCATCCGTGCCCAGGCCCGTCG	1	0.07	0	0	2	0.1	4	0.03	0	0	4	0	3	0	14
	GGTGTCGTAGGGCCGAACCTCATCGATGCCCAGGCCCGTCG	0	0	0	0	0	0	0	0	0	0	7	0.01	6	0.01	13
	GGTGTCGTAGGGCCGAACCTCATCCGTGCCCAGGCCCGTG	0	0	0	0	1	0.05	2	0.01	1	0	5	0	2	0	11
	GGTGTCGTAGGGCCGAACCTCATCCATGCCCAGGCCTGTCGC	0	0	0	0	0	0	0	0	8	0.06	1	0	1	0	10
	GGTGTCGTAGGGCCGAACCTCATCCTTGCCCAGGCCCGTCG	0	0	0	0	0	0	2	0.01	0	0	3	0	4	0	9
	GGTGTCGTAGGGCCGAACTCATTCCGTGCCCAGGCCCGTCG	0	0	0	0	0	0	1	0	0	0	4	0	3	0	8
	GGTGTCGTAGGGCCGAACCTCATCCGTTCCCAGGCCCGTCGC	0	0	0	0	0	0	1	0	4	0.03	0	0	3	0	8
	GGTGTCGTAGGGCCGAACCTCATTCGTGCCCAGGCCCGTG	0	0	0	0	0	0	2	0.01	0	0	3	0	2	0	7
	GGTGTCGTAGGGCCGAACCTCATCCATGCCCAGGCCCGTCGC	0	0	0	0	1	0.05	0	0	3	0.02	1	0	2	0	7
GACGTGCTAAGCTGTTCGGGTATTGCGTAGGCCGCCCCCC	Total Number of Reads = 752	Number of Unique Sequences = 23
	GACGTGCTAAGCTGTTCGGGTATTGCGTAGGCCGCCCCCC	557	0.74	2	0.66	0	0	0	0	0	0	0	0	0	0	559
	GACGTGCTAAGCTGTTCGGGTATTGCGTAGGCCGCCCCCCC	78	0.1	0	0	0	0	0	0	0	0	0	0	0	0	78
	GACGTGCTAAGCTGTTCGGGTATTGCGTAGGCCGCCCCC	74	0.09	1	0.33	0	0	0	0	0	0	0	0	0	0	75
	GACGTGCTAAGCTGTTCGGGTATTGCGTAGGCCGCCCC	12	0.01	0	0	0	0	0	0	0	0	0	0	0	0	12
	GACGTGCTAAGCTGTTCGGGTATTGCGTAGGCCGCCTCCC	5	0	0	0	0	0	0	0	0	0	0	0	0	0	5
GGTATTACGCAGTAGCTGGGAGAGCCTAGACTGCGCCCCC	Total Number of Reads = 744	Number of Unique Sequences = 15
	GGTATTACGCAGTAGCTGGGAGAGCCTAGACTGCGCCCCC	525	0.7	0	0	0	0	1	0.5	0	0	0	0	0	0	526
	GGTATTACGCAGTAGCTGGGAGAGCCTAGACTGCGCCCC	84	0.11	0	0	0	0	0	0	0	0	0	0	0	0	84
	GGTATTACGCAGTAGCTGGGAGAGCCTAGACTGCCGCCCCC	76	0.1	0	0	0	0	1	0.5	0	0	0	0	0	0	77
	GGTATTACGCAGTAGCTGGGAGAGCCTAGACTGCGCCCCCC	20	0.02	0	0	0	0	0	0	0	0	0	0	0	0	20
	GGTATTACGCAGTAGCTGGGAGAGCCTAGACTGCCGCCCC	16	0.02	0	0	0	0	0	0	0	0	0	0	0	0	16
	GGGTATTACGCAGTAGCTGGGAGAGCCTAGACTGCGCCCCC	7	0	0	0	0	0	0	0	0	0	0	0	0	0	7
GGTGTCGGTAGGGCCGAACTCATCGTTCCAGGCCCGTGC	Total Number of Reads = 3097	Number of Unique Sequences = 247
	GGTGTCGGTAGGGCCGAACTCATCGTTCCAGGCCCGTGC	18	0.08	10	0.15	28	0.27	62	0.18	283	0.53	494	0.49	315	0.37	1210
	GGTGTCGTAAGGGCCGAACTCATCGTTCCAGGCCCGTGC	9	0.04	8	0.12	13	0.12	61	0.18	62	0.11	174	0.17	194	0.22	521
	AGTGTTGTAAGGGCCGAACTCATCGTTCCAGGCCCGTGC	111	0.5	20	0.3	22	0.21	46	0.13	6	0.01	12	0.01	4	0	221
	GGTGTCGTAGGGACCGAACTCATCGTTCCAGGCCCGTGC	2	0	4	0.06	6	0.05	17	0.05	20	0.03	38	0.03	24	0.02	111
	GGTGTCGCTAGGGCCGAACTCATCGTTCCAGGCCCGTGC	1	0	3	0.04	2	0.01	15	0.04	14	0.02	29	0.02	40	0.04	104
	GGTGTCGTTAGGGCCGAACTCATCGTTCCAGGCCCGTGC	0	0	0	0	1	0	11	0.03	14	0.02	28	0.02	36	0.04	90
	GGTGTCGTAGGGGCCGAACTCATCGTTCCAGGCCCGTGC	0	0	1	0.01	2	0.01	11	0.03	5	0	28	0.02	30	0.03	77
	GGTGTCGTAGGGCCCGAACTCATCGTTCCAGGCCCGTGC	2	0	1	0.01	1	0	7	0.02	11	0.02	30	0.02	19	0.02	71
	GGTGTCGTAAGGGCCGAACTCATCGTTCCAGCCCCGTGC	0	0	0	0	1	0	6	0.01	4	0	11	0.01	18	0.02	40
	GGTGTCGTAGGGTCCGAACTCATCGTTCCAGGCCCGTGC	1	0	1	0.01	2	0.01	6	0.01	6	0.01	11	0.01	8	0	35
	GGGTGTCGTAAGGGCCGAACTCATCGTTCCAGGCCCGTGC	0	0	0	0	2	0.01	2	0	4	0	8	0	9	0.01	25
	GGTGTTGTAGGGGCCGAACTCATCGTTCCAGGCCCCTGC	1	0	0	0	0	0	0	0	23	0.04	1	0	0	0	25
	GGTGTCGTACGGGCCGAACTCATCGTTCCAGGCCCGTGC	1	0	0	0	1	0	2	0	1	0	9	0	7	0	21
	AGTGTTGTAAGGGCCGAACTCATCGTTCCAGCCCCGTGC	6	0.02	2	0.03	5	0.04	4	0.01	2	0	1	0	0	0	20
	GTGTCGTAAGGGCCGAACTCATCGTTCCAGGCCCGTGC	0	0	0	0	0	0	4	0.01	2	0	7	0	6	0	19
	AGTGTTGTAGGGGCCGAACTCATCGTTCCAGGCCCGTGC	12	0.05	1	0.01	0	0	4	0.01	0	0	0	0	0	0	17
	GGGTGTCGTAGGGGCCGAACTCATCGTTCCAGGCCCGTGC	0	0	0	0	0	0	3	0	4	0	4	0	6	0	17
GTGATGTCGTAGGGCCGAACTCATCGTTCCAGGCCCGTGC	Total Number of Reads = 6510	Number of Unique Sequences = 125
	GTGATGTCGTAGGGCCGAACTCATCGTTCCAGGCCCGTGC	41	0.41	1	0.5	33	0.49	500	0.45	397	0.61	1209	0.56	1459	0.59	3640
	GTGATGTCGTAGGGCCGAACTCATCGTTCCAGGCCCCGTCG	13	0.13	0	0	8	0.11	194	0.17	67	0.1	346	0.16	391	0.15	1019
	GTGATGTCGTAGGGCCGAACTCATCGTTCCAGGCCCCTGCG	1	0.01	0	0	2	0.02	105	0.09	47	0.07	163	0.07	151	0.06	469
	GTGATGTCGTAGGGCCGAACTCATCGTTCCAGGCCCCGTCGC	0	0	0	0	0	0	22	0.01	12	0.01	56	0.02	61	0.02	151
	GTGATGTCGTAGGGCCGAACTCATCGTTCCAGGCCCCGGCG	0	0	0	0	2	0.02	22	0.01	8	0.01	37	0.01	58	0.02	127
	GTGATGTCGTAGGGCCGAACTCATCGTTCCAGGCCCCAGTGC	4	0.04	0	0	3	0.04	18	0.01	10	0.01	40	0.01	41	0.01	116
	GTGATGTCGTAGGGCCGAACTCATCGTTCCAGGCCCCGCCG	8	0.08	0	0	2	0.02	25	0.02	7	0.01	34	0.01	35	0.01	111
	GTGATGTCGTAGGGCCGAACTCATCGTTCCAGGCCCCGGTGC	2	0.02	0	0	1	0.01	16	0.01	2	0	28	0.01	22	0	71
	GTGATGTCGTAGGGCCGAACTCATCGTTCCAGGCCCGTCGC	1	0.01	0	0	1	0.01	8	0	9	0.01	28	0.01	23	0	70
	GTGATGTCGTAGGGCCGAACTCATCGTTCCAGGCCCCTGTCG	0	0	0	0	0	0	12	0.01	10	0.01	23	0.01	22	0	67
	GTGATGTCGTAGGGCCGAACTCATCGTTCCAGGCCCCTG	3	0.03	0	0	0	0	14	0.01	8	0.01	18	0	21	0	64
	GTGATGTCGTAGGGCCGAACTCATCGTTCCAGGCCCCTGTGC	1	0.01	0	0	1	0.01	7	0	6	0	22	0.01	14	0	51
	GTGATGTCGTAGGGCCGAACTCATCGTTCCAGGCCCGTGCC	0	0	0	0	1	0.01	14	0.01	1	0	11	0	22	0	49
	GTGATGTCGTAGGGCCGAACTCATCGTTCCAGGCCCCGGTCG	0	0	0	0	0	0	8	0	3	0	12	0	16	0	39
	GGTGATGTCGTAGGGCCGAACTCATCGTTCCAGGCCCCGTCG	0	0	0	0	3	0.04	11	0	3	0	6	0	11	0	34
GAGTGTGTAGGGCCGAACTCATTCGTTCCAGGCCCCGTGC	Total Number of Reads = 1923	Number of Unique Sequences = 120
	GAGTGTGTAGGGCCGAACTCATTCGTTCCAGGCCCCGTGC	266	0.44	10	0.15	16	0.13	117	0.2	15	0.14	20	0.08	9	0.04	453
	GTGAGTGTAGGGCCGAACTCATTCGTTCCAGGCCCCGTGC	36	0.05	0	0	10	0.08	77	0.13	17	0.16	84	0.34	71	0.35	295
	GTGTGTGTAGGGCCGAACTCATTCGTTCCAGGCCCCGTGC	59	0.09	3	0.04	3	0.02	51	0.08	4	0.03	19	0.07	22	0.1	161
	AGTGTGTAGGGCCGAACTCAATCGTTCCAGGCCCCGTGC	56	0.09	12	0.18	34	0.27	39	0.06	7	0.06	6	0.02	2	0	156
	AGTGTGTAGGGCCGAACTCATCCGTTCCAGGCCCCGTGC	40	0.06	19	0.29	21	0.17	39	0.06	5	0.04	6	0.02	3	0.01	133
	GAGTGTGTAGGGCCGAACTCATCCGTTCCAGGCCCCGTGC	13	0.02	5	0.07	8	0.06	59	0.1	9	0.08	13	0.05	5	0.02	112
	GTGTGTGTAGGGCCGAACTCATCCGTTCCAGGCCCCGTGC	1	0	1	0.01	0	0	36	0.06	6	0.05	26	0.1	40	0.19	110
	GAGTGTGTAGGGCCGAACTCAATCGTTCCAGGCCCCGTGC	17	0.02	7	0.1	9	0.07	36	0.06	13	0.12	12	0.04	4	0.01	98
	AGTGTGTAGGGCCGAACTCATTCGTTCCAGGCCCCGTGC	30	0.04	3	0.04	7	0.05	20	0.03	1	0	5	0.02	0	0	66
	GATGTGTGTAGGGCCGAACTCATTCGTTCCAGGCCCCGTGC	24	0.03	0	0	0	0	12	0.02	4	0.03	2	0	0	0	42
	GTGTGTGTAGGGCCGAACTCAATCGTTCCAGGCCCCGTGC	2	0	0	0	2	0.01	8	0.01	5	0.04	10	0.04	14	0.06	41
	GAGTGTGTAGGGCCGAACTCGATCGTTCCAGGCCCCGTGC	5	0	0	0	1	0	9	0.01	1	0	6	0.02	1	0	23
	GAGTGTGTAGGGCCGAACTCCATCGTTCCAGGCCCCGTGC	1	0	0	0	1	0	11	0.01	1	0	1	0	0	0	15
	GAGTGCGTAGGGCCGAACTCATTCGTTCCAGGCCCCGTGC	3	0	0	0	0	0	5	0	0	0	6	0.02	0	0	14
	GAGTGTGTAGGGCCGAACTCATCGGTTCCAGGCCCCGTGC	2	0	1	0.01	0	0	5	0	1	0	0	0	3	0.01	12
	GAGTGCGTAGGGCCGAACTCATCCGTTCCAGGCCCCGTGC	0	0	0	0	1	0	4	0	1	0	5	0.02	1	0	12
TGAGTTGTAGGGCCGAACTCATCTTCCAGGCCCCGTGC	Total Number of Reads = 3291	Number of Unique Sequences = 137
	TGAGTTGTAGGGCCGAACTCATCTTCCAGGCCCCGTGC	54	0.3	24	0.58	48	0.39	299	0.31	26	0.1	122	0.15	300	0.3	873
	GTGAGTCGTAGGGCCGAACTCATCTTCCAGGCCCCGTGC	3	0.01	1	0.02	3	0.02	88	0.09	28	0.11	151	0.19	177	0.17	451
	GTGTGTCGTAGGGCCGAACTCATCTTCCAGGCCCCGTGC	14	0.07	0	0	8	0.06	104	0.11	19	0.07	92	0.12	112	0.11	349
	GAGTGTCGTAGGGCCGAACTCATCTTCCAGGCCCCGTGC	27	0.15	6	0.14	20	0.16	146	0.15	24	0.09	50	0.06	20	0.02	293
	GGGTGTCGTAGGGCCGAACTCATCTTCCAGGCCCCGTGC	7	0.03	3	0.07	15	0.12	43	0.04	53	0.21	73	0.09	98	0.09	292
	GTGAGTCGTAGGGCCGAACTCATCGTCCAGGCCCCGTGC	0	0	1	0.02	0	0	34	0.03	24	0.09	98	0.12	82	0.08	239
	TGAGTTGTAGGGCCGAACTCATGTTCCAGGCCCCGTGC	14	0.07	2	0.04	10	0.08	57	0.06	18	0.07	19	0.02	42	0.04	162
	GTGTGTCGTAGGGCCGAACTCATCGTCCAGGCCCCGTGC	3	0.01	0	0	1	0	29	0.03	10	0.04	40	0.05	24	0.02	107
	GGTGTGTCGTAGGGCCGAACTCATCTTCCAGGCCCCGTGC	3	0.01	0	0	2	0.01	17	0.01	9	0.03	18	0.02	21	0.02	70
	GTGAGTTGTAGGGCCGAACTCATCGTCCAGGCCCCGTGC	6	0.03	0	0	4	0.03	19	0.02	1	0	14	0.01	13	0.01	57
	GTGAGTTGTAGGGCCGAACTCATCTTCCAGGCCCCGTGC	1	0	0	0	1	0	13	0.01	3	0.01	8	0.01	12	0.01	38
	GAGTGTCGTAGGGCCGAACTCATGTTCCAGGCCCCGTGC	18	0.1	2	0.04	2	0.01	12	0.01	2	0	1	0	0	0	37
	TGAGTCGTAGGGCCGAACTCATCTTCCAGGCCCCGTGC	2	0.01	0	0	0	0	6	0	0	0	7	0	7	0	22
	GTGAGTCGTAGGGCCGAACTCATCGTTCAGGCCCCGTGC	0	0	0	0	0	0	4	0	1	0	8	0.01	7	0	20
	GTGAGTCGTAGGGCCGAACTCACGTTCCAGGCCCCGTGC	0	0	0	0	0	0	3	0	0	0	10	0.01	5	0	18
GGTGTCGTAGGGCCGAACTCATCGTTGCCCAGGCCCCGTGC	Total Number of Reads = 3729	Number of Unique Sequences = 214
	GGTGTCGTAGGGCCGAACTCATCGTTGCCCAGGCCCCGTGC	6	0.05	12	0.19	17	0.11	107	0.19	94	0.18	261	0.23	274	0.22	771
	GGTGTCGTAGGGCCGAACTCATCGTTTTCCAGGCCCCGTGC	6	0.05	4	0.06	20	0.13	70	0.12	57	0.11	158	0.14	126	0.1	441
	GGTGTCGTAGGGCCGAACTCATCGTTCCCCAGGCCCCGTGC	9	0.08	5	0.08	15	0.1	70	0.12	70	0.13	116	0.1	136	0.11	421
	GGTGTCGTAGGGCCGAACTCATCGGGTTCCAGGCCCCGTGC	5	0.04	2	0.03	13	0.09	39	0.07	43	0.08	88	0.07	71	0.05	261
	GGTGTCGTAGGGCCGAACTCATCGGTTCCCAGGCCCCGTGC	2	0.01	2	0.03	1	0	24	0.04	33	0.06	54	0.04	81	0.06	197
	GGTGTCGTAGGGCCGAACTCATCGTTTCCCAGGCCCCGTGC	2	0.01	4	0.06	2	0.01	11	0.01	13	0.02	29	0.02	73	0.05	134
	GGTGTCGTAGGGCCGAACTCATCGATTCCCAGGCCCCGTGC	2	0.01	0	0	7	0.04	13	0.02	16	0.03	47	0.04	35	0.02	120
	GGTGTCGTAGGGCCGAACTCATCGTTGGCCAGGCCCCGTGC	3	0.02	4	0.06	5	0.03	10	0.01	13	0.02	42	0.03	36	0.02	113
	GGTGTCGTAGGGCCGAACTCATCGTTGTCCAGGCCCCGTGC	1	0	0	0	1	0	12	0.02	13	0.02	47	0.04	31	0.02	105
	GGTGTCGTAGGGCCGAACTCATCGAATTCCAGGCCCCGTGC	3	0.02	1	0.01	5	0.03	13	0.02	16	0.03	34	0.03	25	0.02	97
	AGTGTTGTAGGGCCGAACTCATCGTTTTCCAGGCCCCGTGC	35	0.31	8	0.13	9	0.06	19	0.03	4	0	3	0	0	0	78
	GGTGTCGTAGGGCCGAACTCATCGATTGCCAGGCCCCGTGC	2	0.01	5	0.08	2	0.01	13	0.02	5	0	27	0.02	17	0.01	71
	GGTGTCGTAGGGCCGAACTCATCGGTTCCAAGGCCCCGTGC	0	0	0	0	3	0.02	10	0.01	4	0	16	0.01	30	0.02	63
	GGTGTCGTAGGGCCGAACTCATCGTTTCCAAGGCCCCGTGC	2	0.01	0	0	2	0.01	9	0.01	5	0	10	0	33	0.02	61
	GGTGTCGTAGGGCCGAACTCATCGTTAACCAGGCCCCGTGC	0	0	1	0.01	1	0	12	0.02	15	0.02	15	0.01	17	0.01	61
	GGGTGTCGTAGGGCCGAACTCATCGTTGCCCAGGCCCCGTGC	0	0	0	0	0	0	10	0.01	3	0	19	0.01	17	0.01	49
	GGTGTCGTAGGGCCGAACTCATCGATGTCCAGGCCCCGTGC	0	0	0	0	1	0	6	0.01	5	0	18	0.01	18	0.01	48
	GGTGTCGTAGGGCCGAACTCATCGGATTCCAGGCCCCGTGC	0	0	1	0.01	1	0	8	0.01	9	0.01	5	0	10	0	34
	GGTGTCGTAGGGCCGAACTCATCGTTCGCTAGGCCCCGTGC	1	0	0	0	0	0	7	0.01	1	0	12	0.01	9	0	30
	GGTGTCGTAGGGCCGAACTCATCGGTTGCCAGGCCCCGTGC	0	0	1	0.01	1	0	4	0	4	0	7	0	10	0	27
	GGTGTCGTAGGGCCGAACTCATCGTTACCCAGGCCCCGTGC	0	0	0	0	0	0	6	0.01	2	0	4	0	14	0.01	26
	GGGTGTCGTAGGGCCGAACTCATCGTTTCCCAGGCCCCGTGC	0	0	0	0	1	0	2	0	1	0	5	0	17	0.01	26
	GGTGTCGTAGGGCCGAACTCATCCGTTTCCAGGCCCCGTGC	0	0	1	0.01	3	0.02	0	0	2	0	6	0	11	0	23
	GGTGTCGTAGGGCCGAACTCATCGTTTGCCAGGCCCCGTGC	0	0	2	0.03	0	0	2	0	2	0	4	0	12	0	22
	GGTGTTGTAGGGCCGAACTCATCGTTTCCCAGGCCCCGTGC	1	0	0	0	4	0.02	7	0.01	2	0	5	0	2	0	21
	GGTGTCGTAGGGCCGAACTCATCGGTTTCCAGGCCCCGTGC	1	0	0	0	1	0	1	0	5	0	4	0	9	0	21
AGTGTGTAGGACGGCAACTCATCGTTCCAGGCCCCGTGC	Total Number of Reads = 1584	Number of Unique Sequences = 150
	AGTGTGTAGGACGGCAACTCATCGTTCCAGGCCCCGTGC	259	0.3	27	0.29	52	0.36	80	0.21	14	0.28	8	0.18	0	0	440
	AGTGTGTTAGGCGGCAACTCATCGTTCCAGGCCCCGTGC	114	0.13	11	0.11	15	0.1	57	0.15	1	0.02	2	0.04	1	0.02	201
	AGTGTGTGGTACGGCAACTCATCGTTCCAGGCCCCGTGC	91	0.1	16	0.17	15	0.1	34	0.09	3	0.06	1	0.02	2	0.05	162
	AGTGTGTTGGACGGCAACTCATCGTTCCAGGCCCCGTGC	64	0.07	22	0.23	15	0.1	27	0.07	1	0.02	0	0	1	0.02	130
	AGTGTGTAGGTCGGCAACTCATCGTTCCAGGCCCCGTGC	69	0.08	2	0.02	4	0.02	25	0.06	1	0.02	0	0	0	0	101
	TGAGTGTAGGACGGCAACTCATCGTTCCAGGCCCCGTGC	11	0.01	1	0.01	7	0.04	15	0.04	10	0.2	7	0.15	12	0.3	63
	AGTGTGTAGGGCCGTAACTCATCGTTCCAGGCCCCGTGC	11	0.01	6	0.06	5	0.03	6	0.01	4	0.08	1	0.02	0	0	33
	AGTGTGTAGGGCGTGAACTCATCGTTCCAGGCCCCGTGC	18	0.02	1	0.01	4	0.02	7	0.01	1	0.02	0	0	0	0	31
	AGTGTATTGGACGGCAACTCATCGTTCCAGGCCCCGTGC	16	0.01	0	0	5	0.03	4	0.01	0	0	0	0	1	0.02	26
	AGTGTCTAGGTCGGCAACTCATCGTTCCAGGCCCCGTGC	9	0.01	0	0	3	0.02	6	0.01	0	0	0	0	0	0	18
	AGTGTGTTAGGCGGCAACTCATCGTTCCAGGCCCCGTG	14	0.01	1	0.01	1	0	0	0	2	0.04	0	0	0	0	18
	AGTGTGTACGGCGGCAACTCATCGTTCCAGGCCCCGTGC	10	0.01	0	0	0	0	4	0.01	0	0	0	0	0	0	14
	GTGCGTAGGTCGGCAACTCATCGTTCCAGGCCCCGTGC	2	0	0	0	0	0	2	0	1	0.02	5	0.11	3	0.07	13
	AGTGCGTAGGACGGCAACTCATCGTTCCAGGCCCCGTGC	5	0	0	0	0	0	6	0.01	0	0	0	0	1	0.02	12
	AGATGTGTAGGTCGGCAACTCATCGTTCCAGGCCCCGTGC	3	0	2	0.02	0	0	6	0.01	1	0.02	0	0	0	0	12
	AGTGTCTAGGACGGCAACTCATCGTTCCAGGCCCCGTGC	6	0	0	0	3	0.02	1	0	0	0	0	0	0	0	10
	GTGCGTAGGACGGCAACTCATCGTTCCAGGCCCCGTGC	0	0	0	0	0	0	0	0	1	0.02	5	0.11	3	0.07	9
	AGAGTGTGGTACGGCAACTCATCGTTCCAGGCCCCGTGC	5	0	0	0	1	0	3	0	0	0	0	0	0	0	9
	AGTGTGTAGGTCGGCAACTCATCGTTCCAGGCCCCGTG	7	0	0	0	1	0	1	0	0	0	0	0	0	0	9
	AGTGTGTAGGGCTGAAACTCATCGTTCCAGGCCCCGTGC	4	0	0	0	0	0	4	0.01	0	0	0	0	0	0	8
	AGTGTATAGGACGGCAACTCATCGTTCCAGGCCCCGTGC	6	0	0	0	2	0.01	0	0	0	0	0	0	0	0	8
AGTGTTGTAGGGCCGAACTCATCGTTCCAGGCCCGGTGC	Total Number of Reads = 31361	Number of Unique Sequences = 389
	AGTGTTGTAGGGCCGAACTCATCGTTCCAGGCCCGGTGC	12777	0.64	1073	0.47	583	0.28	674	0.18	22	0.02	22	0.01	5	0	15156
	AGTGTTGTAGGGCCGAACTCATCGTTCCAGGCCCCTTGC	1563	0.07	484	0.21	706	0.34	1058	0.29	137	0.16	76	0.04	30	0.02	4054
	GGTGTCGTAGGGCCGAACTCATCGTTCCAGGCCCGTCGC	52	0	20	0	102	0.04	412	0.11	442	0.52	1167	0.74	881	0.73	3076
	AGTGTTGTAGGGCCGAACTCATCGTTCCAGGCCCCGCGC	1734	0.08	259	0.11	263	0.12	543	0.15	71	0.08	20	0.01	15	0.01	2905
	AGTGTTGTAGGGCCGAACTCATCGTTCCAGGCCCGGTG	903	0.04	139	0.06	74	0.03	88	0.02	3	0	2	0	0	0	1209
	AGTGTTGTAGGGCCGAACTCATCGTTCCAGGCCCGGTGT	438	0.02	15	0	4	0	2	0	0	0	0	0	0	0	459
	AGTGTTGTAGGGCCGAACTCATCGTTCCAGGCCCGTCGC	178	0	47	0.02	60	0.02	87	0.02	23	0.02	11	0	7	0	413
	TGAGTTGTAGGGCCGAACTCATCGTTCCAGGCCCGTCGC	28	0	10	0	22	0.01	122	0.03	38	0.04	69	0.04	90	0.07	379
	AGTGTTGTAGGGCCGAACTCATCGTTCCAGGCCCGTGCC	112	0	29	0.01	28	0.01	79	0.02	9	0.01	4	0	4	0	265
	AGAGTTGTAGGGCCGAACTCATCGTTCCAGGCCCGGTGC	189	0	15	0	8	0	21	0	1	0	2	0	0	0	236
GGTGTCGTAGGGGGCCGAACTCATCGTTCCAGGCCCCGTGC	Total Number of Reads = 2427	Number of Unique Sequences = 135
	GGTGTCGTAGGGGGCCGAACTCATCGTTCCAGGCCCCGTGC	7	0.08	5	0.13	22	0.18	75	0.22	57	0.16	169	0.22	156	0.2	491
	GGTGTCGGGTAGGGCCGAACTCATCGTTCCAGGCCCCGTGC	3	0.03	4	0.1	13	0.1	51	0.15	66	0.19	134	0.17	115	0.15	386
	GGTGTCGTAAAGGGCCGAACTCATCGTTCCAGGCCCCGTGC	5	0.05	2	0.05	23	0.19	57	0.17	58	0.17	119	0.15	111	0.14	375
	GGTGTCGTTTAGGGCCGAACTCATCGTTCCAGGCCCCGTGC	8	0.09	4	0.1	20	0.16	41	0.12	43	0.12	120	0.15	129	0.17	365
	GGTGTCGGTAAGGGCCGAACTCATCGTTCCAGGCCCCGTGC	0	0	2	0.05	5	0.04	3	0	20	0.05	32	0.04	28	0.03	90
	AGTGTTGTAAAGGGCCGAACTCATCGTTCCAGGCCCCGTGC	34	0.4	10	0.26	10	0.08	16	0.04	3	0	2	0	0	0	75
	GGTGTCGCCTAGGGCCGAACTCATCGTTCCAGGCCCCGTGC	1	0.01	1	0.02	4	0.03	8	0.02	10	0.02	27	0.03	21	0.02	72
	GGTGTCGGCTAGGGCCGAACTCATCGTTCCAGGCCCCGTGC	0	0	0	0	1	0	7	0.02	14	0.04	23	0.03	25	0.03	70
	GGTGTCGTACCGGGCCGAACTCATCGTTCCAGGCCCCGTGC	3	0.03	0	0	2	0.01	7	0.02	6	0.01	19	0.02	23	0.03	60
	GGTGTCGTAAGGGGCCGAACTCATCGTTCCAGGCCCCGTGC	0	0	0	0	2	0.01	9	0.02	4	0.01	11	0.01	21	0.02	47
	GGTGTCGTTAAGGGCCGAACTCATCGTTCCAGGCCCCGTGC	0	0	0	0	3	0.02	3	0	1	0	12	0.01	20	0.02	39
	GGGTGTCGTAAGGGGCCGAACTCATCGTTCCAGGCCCCGTGC	0	0	2	0.05	1	0	5	0.01	5	0.01	10	0.01	14	0.01	37
	GGTGTCGGTTAGGGCCGAACTCATCGTTCCAGGCCCCGTGC	0	0	0	0	0	0	2	0	3	0	12	0.01	9	0.01	26
	GGTGTCGTAAGGGCCCGAACTCATCGTTCCAGGCCCCGTGC	0	0	0	0	0	0	1	0	6	0.01	5	0	12	0.01	24
	GGTGTCGTTAGGGGCCGAACTCATCGTTCCAGGCCCCGTGC	1	0.01	0	0	0	0	1	0	3	0	6	0	10	0.01	21
	GGGTGTCGTTTAGGGCCGAACTCATCGTTCCAGGCCCCGTGC	1	0.01	0	0	2	0.01	3	0	4	0.01	7	0	2	0	19
	GGTGTCGTAGAGGGCCGAACTCATCGTTCCAGGCCCCGTGC	0	0	0	0	0	0	6	0.01	0	0	3	0	4	0	13
GGTGCGTAGGGCCGAACTCATCGTTCCAGGCCCCCGTGC	Total Number of Reads = 4494	Number of Unique Sequences = 216
	GGTGCGTAGGGCCGAACTCATCGTTCCAGGCCCCCGTGC	32	0.15	21	0.25	71	0.35	214	0.32	232	0.37	520	0.39	606	0.43	1696
	GGTGCGTAGGGCCGAACTCATCGTTCCAGGCCCCGGTGC	4	0.01	3	0.03	11	0.05	39	0.05	60	0.09	146	0.11	104	0.07	367
	GGTGCGTAGGGCCGAACTCATCGTTCCAGGCCCCGTAGC	5	0.02	6	0.07	12	0.05	54	0.08	47	0.07	93	0.07	104	0.07	321
	GGTGCGTAGGGCCGAACTCATCGTTCCAGGCCCCAGTGC	5	0.02	2	0.02	9	0.04	35	0.05	47	0.07	70	0.05	91	0.06	259
	GGTGCGTAGGGCCGAACTCATCGTTCCAGGCCCCGTGGC	5	0.02	0	0	12	0.05	30	0.04	34	0.05	61	0.04	80	0.05	222
	AGTGTGTAGGGCCGAACTCATCGTTCCAGGCCCCGGTGC	75	0.35	18	0.21	27	0.13	70	0.1	2	0	9	0	4	0	205
	GGTGCGTAGGGCCGAACTCATCGTTCCAGGGCCCCGTGC	2	0	1	0.01	3	0.01	26	0.03	25	0.04	69	0.05	56	0.04	182
	GGGTGCGTAGGGCCGAACTCATCGTTCCAGGCCCCCGTGC	2	0	2	0.02	10	0.04	28	0.04	23	0.03	62	0.04	55	0.03	182
	GGTGCGTAGGGCCGAACTCATCGTTCCAGGCCCCGTCGC	4	0.01	1	0.01	5	0.02	10	0.01	29	0.04	58	0.04	53	0.03	160
	GGTGCGTAGGGCCGAACTCATCGTTCCAGGCCCCTGTGC	0	0	1	0.01	0	0	12	0.01	14	0.02	32	0.02	32	0.02	91
	GTGCGTAGGGCCGAACTCATCGTTCCAGGCCCCCGTGC	2	0	1	0.01	0	0	18	0.02	11	0.01	32	0.02	27	0.01	91
	GGTGTGTAGGGCCGAACTCATCGTTCCAGGCCCCCGTGC	19	0.09	3	0.03	6	0.02	20	0.03	14	0.02	8	0	5	0	75
	GATGCGTAGGGCCGAACTCATCGTTCCAGGCCCCCGTGC	16	0.07	5	0.05	3	0.01	5	0	0	0	2	0	2	0	33
	GGTGCGTAGGGCCGAACTCATCGTTCCAGGCCCCGTTGC	1	0	0	0	1	0	1	0	7	0.01	10	0	13	0	33
	GGTGCGTAGGGCCGAACTCATCGTTCCAGGCCCCCGTGCC	1	0	0	0	3	0.01	4	0	3	0	8	0	10	0	29
	GTGCGTAGGGCCGAACTCATCGTTCCAGGCCCCGTAGC	0	0	0	0	1	0	5	0	2	0	13	0	6	0	27
	GTGCGTAGGGCCGAACTCATCGTTCCAGGCCCCAGTGC	1	0	0	0	0	0	6	0	2	0	11	0	5	0	25
	AGTGCGTAGGGCCGAACTCATCGTTCCAGGCCCCCGTGC	6	0.02	3	0.03	2	0.01	6	0	4	0	1	0	2	0	24
GTGATGTCGGTAGGGCCGAACTCATCGTTCCAGGCCCCGTGC	Total Number of Reads = 2180	Number of Unique Sequences = 100
	GTGATGTCGGTAGGGCCGAACTCATCGTTCCAGGCCCCGTGC	2	0.02	4	0.15	4	0.07	94	0.19	125	0.44	339	0.53	332	0.52	900
	GTGATGTTCGTAGGGCCGAACTCATCGTTCCAGGCCCCGTGC	4	0.05	2	0.07	10	0.18	112	0.23	33	0.11	81	0.12	123	0.19	365
	GATGGTCGTAGGGCCGAACTCATCGTTCCAGGCCCCGTGC	6	0.07	8	0.3	3	0.05	28	0.05	38	0.13	75	0.11	58	0.09	216
	AGATGTTCGTAGGGCCGAACTCATCGTTCCAGGCCCCGTGC	11	0.14	4	0.15	8	0.14	64	0.13	11	0.03	4	0	4	0	106
	GGATGTGCGTAGGGCCGAACTCATCGTTCCAGGCCCCGTGC	4	0.05	1	0.03	4	0.07	22	0.04	13	0.04	17	0.02	12	0.01	73
	TGATGTTCGTAGGGCCGAACTCATCGTTCCAGGCCCCGTGC	7	0.09	1	0.03	1	0.01	28	0.05	4	0.01	11	0.01	7	0.01	59
	GTGATGTCAGTAGGGCCGAACTCATCGTTCCAGGCCCCGTGC	0	0	0	0	0	0	9	0.01	6	0.02	20	0.03	18	0.02	53
	GTGATGTACGTAGGGCCGAACTCATCGTTCCAGGCCCCGTGC	0	0	0	0	1	0.01	6	0.01	2	0	19	0.02	12	0.01	40
	GTGATGTCGTTAGGGCCGAACTCATCGTTCCAGGCCCCGTGC	2	0.02	0	0	0	0	3	0	1	0	18	0.02	10	0.01	34
	TGATGTTGGTAGGGCCGAACTCATCGTTCCAGGCCCCGTGC	4	0.05	2	0.07	2	0.03	8	0.01	5	0.01	3	0	8	0.01	32
	ATGATGTTCGTAGGGCCGAACTCATCGTTCCAGGCCCCGTGC	8	0.1	0	0	0	0	15	0.03	3	0.01	2	0	0	0	28
	GGATGTCCGTAGGGCCGAACTCATCGTTCCAGGCCCCGTGC	1	0.01	1	0.03	1	0.01	3	0	6	0.02	6	0	6	0	24
	GATGATCGTAGGGCCGAACTCATCGTTCCAGGCCCCGTGC	0	0	0	0	0	0	10	0.02	3	0.01	8	0.01	2	0	23
	AGATGTTGGTAGGGCCGAACTCATCGTTCCAGGCCCCGTGC	6	0.07	0	0	5	0.09	7	0.01	3	0.01	1	0	0	0	22
	AGATGTTTGTAGGGCCGAACTCATCGTTCCAGGCCCCGTGC	6	0.07	1	0.03	2	0.03	11	0.02	0	0	1	0	0	0	21
AGTGTTGTAGGGCCAAACTCATCGTTCCAGGCCCCGTGC	Total Number of Reads = 6591	Number of Unique Sequences = 311
	AGTGTTGTAGGGCCAAACTCATCGTTCCAGGCCCCGTGC	833	0.36	176	0.36	155	0.24	411	0.27	46	0.1	47	0.06	17	0.02	1685
	AGTGTTGTAGGCCGGAACTCATCGTTCCAGGCCCCGTGC	546	0.24	130	0.27	198	0.3	304	0.2	43	0.1	10	0.01	6	0	1237
	GGTGTCGTAGGCCGAAACTCATCGTTCCAGGCCCCGTGC	17	0	12	0.02	31	0.04	101	0.06	115	0.27	282	0.41	247	0.39	805
	AGTGTTGTAGGCCGAAACTCATCGTTCCAGGCCCCGTGC	175	0.07	35	0.07	41	0.06	91	0.06	6	0.01	12	0.01	2	0	362
	GGTGTCGTAGGCCGAAGCTCATCGTTCCAGGCCCCGTGC	8	0	1	0	8	0.01	26	0.01	51	0.11	75	0.11	84	0.13	253
	AGTGTTGTAGGACGCAACTCATCGTTCCAGGCCCCGTGC	93	0.04	15	0.03	22	0.03	37	0.02	3	0	2	0	3	0	175
	AGTGTTGTAGGCGGCAACTCATCGTTCCAGGCCCCGTGC	85	0.03	13	0.02	28	0.04	35	0.02	4	0	2	0	0	0	167
	GGTGTCGAGGGCCGAAACTCATCGTTCCAGGCCCCGTGC	4	0	2	0	6	0	21	0.01	23	0.05	46	0.06	53	0.08	155
	TGAGTTGTAGGCCGAAACTCATCGTTCCAGGCCCCGTGC	12	0	4	0	17	0.02	43	0.02	10	0.02	18	0.02	38	0.06	142
	AGTGTTGTAGGCCGAAGCTCATCGTTCCAGGCCCCGTGC	51	0.02	10	0.02	8	0.01	16	0.01	2	0	2	0	1	0	90
	GGTGTCGTGGGCCGAAACTCATCGTTCCAGGCCCCGTGC	3	0	0	0	0	0	4	0	9	0.02	25	0.03	35	0.05	76
	AGTGTCGTAGGCCGGAACTCATCGTTCCAGGCCCCGTGC	20	0	6	0.01	16	0.02	20	0.01	6	0.01	6	0	1	0	75
	AGAGTTGTAGGGCCAAACTCATCGTTCCAGGCCCCGTGC	18	0	3	0	3	0	35	0.02	4	0	1	0	5	0	69
	GTGTCGTAGGCCGAAACTCATCGTTCCAGGCCCCGTGC	0	0	0	0	4	0	7	0	11	0.02	20	0.02	20	0.03	62
	AGTGTTGTAGGCCCGAACTCATCGTTCCAGGCCCCGTGC	24	0.01	6	0.01	9	0.01	17	0.01	1	0	0	0	1	0	58
	AGTGTTGTAGGCGCGAACTCATCGTTCCAGGCCCCGTGC	33	0.01	4	0	3	0	13	0	0	0	1	0	1	0	55
	GAGTGTCGTAGGCCGGAACTCATCGTTCCAGGCCCCGTGC	13	0	0	0	2	0	28	0.01	1	0	5	0	1	0	50
	TGAGTTGTAGGCCGAAGCTCATCGTTCCAGGCCCCGTGC	7	0	1	0	6	0	13	0	1	0	8	0.01	14	0.02	50
	GTGTCGTAGGCCGAAGCTCATCGTTCCAGGCCCCGTGC	3	0	0	0	2	0	8	0	8	0.01	17	0.02	11	0.01	49
	AGTGTTGTAGGGCGGAACTCATCGTTCCAGGCCCCGTGC	12	0	4	0	9	0.01	8	0	3	0	1	0	3	0	40
	GGTGTTGAGGGCCGAAACTCATCGTTCCAGGCCCCGTGC	10	0	2	0	1	0	10	0	7	0.01	3	0	7	0.01	40
	GGTGTTGAGGGCCGGAACTCATCGTTCCAGGCCCCGTGC	3	0	4	0	4	0	10	0	6	0.01	4	0	3	0	34
	AGTGTTGTAGGGCGAAACTCATCGTTCCAGGCCCCGTGC	17	0	2	0	1	0	8	0	2	0	2	0	1	0	33
GGTGTCGTAGGGCCGAACTCATTTCGTTCCAGGCCCCGTGC	Total Number of Reads = 1994	Number of Unique Sequences = 119
	GGTGTCGTAGGGCCGAACTCATTTCGTTCCAGGCCCCGTGC	5	0.06	7	0.18	14	0.14	49	0.16	50	0.16	128	0.21	105	0.17	358
	GGTGTCGTAGGGCCGAACTCAAATCGTTCCAGGCCCCGTGC	5	0.06	6	0.15	17	0.17	38	0.12	52	0.17	130	0.21	103	0.17	351
	GGTGTCGTAGGGCCGAACTTTCATCGTTCCAGGCCCCGTGC	10	0.13	5	0.13	13	0.13	59	0.19	50	0.16	98	0.16	92	0.15	327
	GGTGTCGTAGGGCCGAACTCCCATCGTTCCAGGCCCCGTGC	8	0.1	1	0.02	11	0.11	38	0.12	38	0.12	79	0.13	93	0.15	268
	GGTGTCGTAGGGCCGAACCCTCATCGTTCCAGGCCCCGTGC	1	0.01	3	0.07	15	0.15	40	0.13	42	0.14	76	0.12	56	0.09	233
	AGTGTTGTAGGGCCGAACTCAAATCGTTCCAGGCCCCGTGC	29	0.39	9	0.23	5	0.05	15	0.05	0	0	1	0	0	0	59
	GGTGTCGTAGGGCCGAACTCGGATCGTTCCAGGCCCCGTGC	2	0.02	0	0	2	0.02	4	0.01	9	0.03	12	0.02	21	0.03	50
	GGTGTCGTAGGGCCGAACTCAATCCGTTCCAGGCCCCGTGC	1	0.01	0	0	1	0.01	5	0.01	6	0.02	10	0.01	24	0.04	47
	GGTGTCGTAGGGCCGAACTTCAATCGTTCCAGGCCCCGTGC	0	0	0	0	3	0.03	2	0	2	0	9	0.01	11	0.01	27
	GGTGTCGTAGGGCCGAACTCAATTCGTTCCAGGCCCCGTGC	0	0	0	0	1	0.01	3	0.01	4	0.01	6	0.01	12	0.02	26
	GGTGTCGTAGGGCCGAACTCGAATCGTTCCAGGCCCCGTGC	0	0	1	0.02	0	0	0	0	5	0.01	2	0	10	0.01	18
	GGGTGTCGTAGGGCCGAACTCATTTCGTTCCAGGCCCCGTGC	0	0	0	0	3	0.03	5	0.01	1	0	4	0	3	0	16
	GGTGTCGTAGGGCCGAACTCGATCCGTTCCAGGCCCCGTGC	1	0.01	0	0	1	0.01	2	0	3	0.01	3	0	2	0	12
GGTGTCGTAGGGCCGAACCTCATCCGTGCCCAGGCCGTCG	Total Number of Reads = 1273	Number of Unique Sequences = 89
	GGTGTCGTAGGGCCGAACCTCATCCGTGCCCAGGCCGTCG	0	0	0	0	4	0.28	15	0.17	34	0.35	172	0.28	126	0.28	351
	GGTGTCGTAGGGCCGAACCTCATTCCTGCCCAGGCCGTCG	1	0.07	2	0.66	2	0.14	9	0.1	13	0.13	151	0.24	109	0.24	287
	GGTGTCGTAGGGCCGAACCTCTTCCATGCCCAGGCCGTCG	0	0	0	0	1	0.07	12	0.13	1	0.01	47	0.07	34	0.07	95
	GGTGTCGTAGGGCCGAACCTCGTCCATGCCCAGGCCGTCG	0	0	0	0	1	0.07	7	0.08	4	0.04	23	0.03	39	0.08	74
	GGTGTCGTAGGGCCGAACCTCATCCGTGCCCAGGCCTGCG	0	0	0	0	1	0.07	3	0.03	10	0.1	30	0.04	23	0.05	67
	GGTGTCGTAGGGCCGAACCTCATCCGTGCCCAGGCCCGCG	0	0	0	0	0	0	3	0.03	1	0.01	36	0.05	27	0.06	67
	GGTGTCGTAGGGCCGAACCTCATCCATGCCCAGGCCGTCG	0	0	0	0	0	0	2	0.02	6	0.06	31	0.05	19	0.04	58
	GGTGTCGTAGGGCCGAACCTCATCGATGCCCAGGCCGTCG	0	0	0	0	0	0	3	0.03	0	0	14	0.02	5	0.01	22
	GGTGTCGTAGGGCCGAACCTCTTCCGTGCCCAGGCCGTCG	0	0	0	0	0	0	3	0.03	0	0	15	0.02	4	0	22
	GGTGTCGTAGGGCCGAACCTCATTCGTGCCCAGGCCGTCG	0	0	0	0	1	0.07	2	0.02	0	0	14	0.02	4	0	21
	GGTGTCGTAGGGCCGAACCTCGTCCATGCCCAGGCCTGCG	0	0	0	0	0	0	1	0.01	1	0.01	8	0.01	6	0.01	16
	GGTGTCGTAGGGCCGAACCTCATCCGTGCCCGGCCCGTCG	0	0	0	0	0	0	0	0	2	0.02	7	0.01	7	0.01	16
	GGTGTCGTAGGGCCGAACCTCATCCGTGCCCAGCCTGTCG	0	0	0	0	0	0	0	0	1	0.01	1	0	7	0.01	9
	AGTGTTGTAGGGCCGAACCTCATTCCTGCCCAGGCCGTCG	4	0.28	0	0	2	0.14	2	0.02	0	0	0	0	0	0	8
	GGTGTCGTAGGGCCGAACCTCATCCATGCCCAGGCCTGCG	0	0	0	0	0	0	1	0.01	3	0.03	3	0	1	0	8
	GGTGTCGTAGGGCCGAACCTCTTCCATGCCCAGGCCTGCG	0	0	0	0	0	0	1	0.01	0	0	6	0	1	0	8
	GGTGTCGTAGGGCCGAACCTCTTCCATGCCCAGGCCGTCGC	0	0	0	0	0	0	0	0	1	0.01	4	0	3	0	8
GTGATGTCGTAGGGCCGAATCATCGTTCCAGGCCCCGTGC	Total Number of Reads = 1162	Number of Unique Sequences = 73
	GTGATGTCGTAGGGCCGAATCATCGTTCCAGGCCCCGTGC	2	0.02	1	0.06	1	0.02	51	0.19	17	0.15	114	0.38	159	0.43	345
	AGATGTTGTAGGGCCGAATCATCGTTCCAGGCCCCGTGC	48	0.62	9	0.56	12	0.32	101	0.38	12	0.1	11	0.03	4	0.01	197
	GATGTCGTAGGGCCGAATCATCGTTCCAGGCCCCGTGC	4	0.05	2	0.12	12	0.32	14	0.05	38	0.33	35	0.11	37	0.1	142
	GTGATGTCGTAGGGCCGAACTATCGTTCCAGGCCCCGTGC	0	0	0	0	0	0	18	0.06	19	0.16	44	0.14	57	0.15	138
	GTGATGTCGTAGGCGCAACTCATCGTTCCAGGCCCCGTGC	0	0	0	0	0	0	5	0.01	3	0.02	20	0.06	27	0.07	55
	GTGATGTCGTAGGGCGAACTCATCGTTCCAGGCCCCGTGC	0	0	0	0	0	0	10	0.03	7	0.06	20	0.06	17	0.04	54
	TGATGTTGTAGGGCCGAATCATCGTTCCAGGCCCCGTGC	9	0.11	3	0.18	3	0.08	20	0.07	4	0.03	5	0.01	7	0.01	51
	GTGATGTCGTAGGGCCGAATCATCGTTCCAGGCCCCGTG	0	0	0	0	0	0	2	0	0	0	7	0.02	8	0.02	17
	GATGTCGTAGGGCCGACTCATCGTTCCAGGCCCCGTGC	1	0.01	0	0	0	0	6	0.02	1	0	5	0.01	3	0	16
	GTGATGTCGTAGGGCCAACTCATCGTTCCAGGCCCCGTGC	0	0	0	0	0	0	1	0	1	0	4	0.01	9	0.02	15
	GGATGTCGTAGGGCCGAATCATCGTTCCAGGCCCCGTGC	0	0	0	0	2	0.05	3	0.01	0	0	7	0.02	2	0	14
	ATGATGTTGTAGGGCCGAATCATCGTTCCAGGCCCCGTGC	4	0.05	0	0	1	0.02	6	0.02	2	0.01	0	0	0	0	13
	GTGATGTCGTAGGGCCGAACTCTCGTTCCAGGCCCCGTGC	0	0	0	0	0	0	1	0	0	0	6	0.02	4	0.01	11
GGTGTCGTAGGGCCGAACTCATCGTCCAGGCCCGTGCC	Total Number of Reads = 863	Number of Unique Sequences = 73
	GGTGTCGTAGGGCCGAACTCATCGTCCAGGCCCGTGCC	2	0.07	9	0.56	11	0.33	43	0.33	42	0.36	145	0.45	86	0.37	338
	GGTGTCGTAGGGCCGAACTCATCGTTCCAGCCCGTGCC	2	0.07	1	0.06	5	0.15	26	0.2	37	0.32	73	0.22	62	0.27	206
	GGTGTCGTAGGGCCGAACTCATCGTCCAGGCCCGTCGC	1	0.03	0	0	3	0.09	5	0.03	8	0.06	38	0.11	16	0.07	71
	TGAGTTGTAGGGCCGAACTCATCGTCCAGGCCCGTGCC	2	0.07	0	0	1	0.03	9	0.07	2	0.01	13	0.04	6	0.02	33
	GGTGTCGTAGGGCCGAACTCATCGTCCAGGCCCGTAGC	2	0.07	1	0.06	1	0.03	7	0.05	5	0.04	1	0	11	0.04	28
	AGTGTTGTAGGGCCGAACTCATCGTCCAGGCCCGTGCC	14	0.51	2	0.12	5	0.15	6	0.04	0	0	0	0	0	0	27
	GTGATGTCGTAGGGCCGAACTCATCGTCCAGGCCCGTGCC	0	0	0	0	1	0.03	3	0.02	0	0	7	0.02	7	0.03	18
	GGTGTCGTAGGGCCGAACTCATCGTCCAGCCCCGTGCC	0	0	0	0	1	0.03	2	0.01	0	0	5	0.01	4	0.01	12
	GGTGTCGTAGGGCCGAACTCATCGTCCAGGCCCGTGGC	0	0	1	0.06	0	0	0	0	4	0.03	3	0	1	0	9
	GGTGTCGTAGGGCCGAACTCATCGTCCAGGCCCCTGCG	0	0	0	0	0	0	1	0	2	0.01	5	0.01	1	0	9
	GGTGTCGTAGGGCCGAACTCATCGTCCAGGCCCGTGTC	0	0	0	0	0	0	2	0.01	2	0.01	0	0	3	0.01	7
	GGTGTCGTAGGGCCGAACTCATCGTTCAGGCCCGTCGC	0	0	0	0	2	0.06	0	0	2	0.01	2	0	1	0	7
	GGTGTCGTAGGGCCGAACTCATCGTCCAGGCCCCTGTCG	0	0	0	0	0	0	1	0	1	0	3	0	1	0	6
	AGTGTCGTAGGGCCGAACTCATCGTCCAGGCCCGTGCC	1	0.03	0	0	1	0.03	2	0.01	1	0	0	0	0	0	5
TGAGTTGTAGGGCCGAACTCATCGTTCCAGGCCCGTGC	Total Number of Reads = 29475	Number of Unique Sequences = 289
	TGAGTTGTAGGGCCGAACTCATCGTTCCAGGCCCGTGC	1693	0.58	493	0.7	1327	0.74	6575	0.73	3028	0.78	3645	0.79	5199	0.77	21960
	TGAGTTGTAGGGCCGAACTCATCGTTCCAGCCCCGTGC	89	0.03	26	0.03	77	0.04	375	0.04	135	0.03	161	0.03	370	0.05	1233
	TGAGTTGTAGGGCCGAACTCATCGTTCCAGGCCCCGTCG	70	0.02	13	0.01	43	0.02	310	0.03	98	0.02	143	0.03	239	0.03	916
	TGAGTTGTAGGGCCGAACTCATCGTTCCAGGCCCGTGT	213	0.07	39	0.05	32	0.01	270	0.03	167	0.04	92	0.02	76	0.01	889
	TGAGTTGTAGGGCCGAACTCATCGTTCCAGGCCCCTGTGC	46	0.01	12	0.01	39	0.02	186	0.02	48	0.01	84	0.01	141	0.02	556
	AGTGTTGTAGGGCCGAACTCATCGTTCCAGGCCCCTGCG	233	0.08	21	0.03	64	0.03	145	0.01	12	0	7	0	1	0	483
	TGAGTTGTAGGGCCGAACTCATCGTTCCAGGCCCCTGCG	36	0.01	2	0	15	0	142	0.01	18	0	38	0	69	0.01	320
	TGAGTTGTAGGGCCGAACTCATCGTTCCAGGCCCGTGCC	17	0	2	0	13	0	66	0	21	0	25	0	68	0.01	212
	GGAGTTGTAGGGCCGAACTCATCGTTCCAGGCCCCTGC	16	0	6	0	13	0	50	0	50	0.01	43	0	31	0	209
	TGAGTTGTAGGGCCGAACTCATCGTTCCAGGCCCGTAC	34	0.01	5	0	20	0.01	65	0	33	0	24	0	24	0	205
	TGAGTTGTAGGGCCGAACTCATCGTTCCAGGCCCCTGGC	28	0	3	0	8	0	56	0	5	0	20	0	52	0	172
	TGAGTTGTAGGGCCGAACTCATCGTTCCAGGCCCCTGC	35	0.01	9	0.01	7	0	62	0	16	0	16	0	21	0	166
AGTGTTGTAGGGCCGAAACTCATCGTTCCCAGGCCCCCGTGC	Total Number of Reads = 1013	Number of Unique Sequences = 97
	AGTGTTGTAGGGCCGAAACTCATCGTTCCCAGGCCCCCGTGC	122	0.55	47	0.67	65	0.53	55	0.31	15	0.17	10	0.07	4	0.02	318
	GGTGTCGTAGGGCCGAAACTCATCGTTCCCAGGCCCCCGTGC	2	0	2	0.02	11	0.09	26	0.14	42	0.47	88	0.62	113	0.57	284
	TGAGTTGTAGGGCCGAAACTCATCGTTCCCAGGCCCCCGTGC	12	0.05	3	0.04	11	0.09	31	0.17	11	0.12	23	0.16	47	0.23	138
	AGTGTTGTAGGGCCGAAACTCATCGTTTCCAGGCCCCCGTGC	14	0.06	4	0.05	8	0.06	9	0.05	1	0.01	0	0	0	0	36
	AGTGTTGTAGGGCCGAAACTCATCGTTCCAGGGCCCCCGTGC	10	0.04	1	0.01	2	0.01	4	0.02	0	0	0	0	0	0	17
	AGTGTTGTAGGGCCGAAACTCATCGTTCCAAGGCCCCCGTGC	7	0.03	2	0.02	2	0.01	5	0.02	0	0	0	0	1	0	17
	AGAGTTGTAGGGCCGAAACTCATCGTTCCCAGGCCCCCGTGC	3	0.01	1	0.01	1	0	3	0.01	1	0.01	3	0.02	0	0	12
	TGAGTTGTAGGGCCGAAACTCATCGTTCCCAGGGCCCCGTGC	0	0	0	0	1	0	0	0	1	0.01	3	0.02	6	0.03	11
	TGAGTTGTAGGGCCGAAACTCATCGTTCCAGGGCCCCCGTGC	1	0	0	0	0	0	1	0	1	0.01	0	0	7	0.03	10
	AGTGTTGTAGGGCCCGAACTCATCGTTCCCAGGCCCCCGTGC	3	0.01	1	0.01	2	0.01	2	0.01	0	0	1	0	0	0	9
	TGAGTTGTAGGGCCGAAACTCATCGTTTCCAGGCCCCCGTGC	0	0	0	0	1	0	3	0.01	1	0.01	1	0	3	0.01	9
	AGTGTTGTAGGGCCGAAACTCATCGTTCCCAGGCCCCGGTGC	3	0.01	0	0	0	0	4	0.02	1	0.01	0	0	0	0	8
	TGAGTTGTAGGGCCGAAACTCATCGTTCCCAAGGCCCCGTGC	0	0	0	0	0	0	3	0.01	1	0.01	0	0	4	0.02	8
	AGTGTTGTAGGGCCGAACCTCATCGTTCCCAGGCCCCCGTGC	4	0.01	0	0	1	0	2	0.01	0	0	0	0	0	0	7
	TGAGTTGTAGGGCCGAAACTCATCGTTCCAAGGCCCCCGTGC	0	0	0	0	0	0	3	0.01	0	0	1	0	2	0.01	6
AGTGTGTGGACGGCGAACTCATCGTTCCAGGCCCCGTGC	Total Number of Reads = 855	Number of Unique Sequences = 93
	AGTGTGTGGACGGCGAACTCATCGTTCCAGGCCCCGTGC	181	0.48	19	0.45	29	0.46	69	0.29	12	0.18	3	0.07	3	0.08	316
	TGAGTGTGGACGGCGAACTCATCGTTCCAGGCCCCGTGC	14	0.03	2	0.04	11	0.17	41	0.17	29	0.43	13	0.3	22	0.61	132
	AGTGTATGGACGGCGAACTCATCGTTCCAGGCCCCGTGC	30	0.08	0	0	10	0.16	20	0.08	0	0	0	0	0	0	60
	ATGAGTGTGGACGGCGAACTCATCGTTCCAGGCCCCGTGC	24	0.06	3	0.07	2	0.03	18	0.07	7	0.1	2	0.04	0	0	56
	AGTGTCTGGACGGCGAACTCATCGTTCCAGGCCCCGTGC	17	0.04	1	0.02	1	0.01	4	0.01	0	0	0	0	0	0	23
	AGTGTCTGGTAGGCGAACTCATCGTTCCAGGCCCCGTGC	10	0.02	1	0.02	3	0.04	6	0.02	0	0	0	0	0	0	20
	ATGAGTCTGGACGGCGAACTCATCGTTCCAGGCCCCGTGC	4	0.01	0	0	0	0	10	0.04	1	0.01	3	0.07	0	0	18
	GAGTGCGTGGACGGCGAACTCATCGTTCCAGGCCCCGTGC	1	0	2	0.04	0	0	6	0.02	4	0.06	4	0.09	1	0.02	18
	AGTGTATTGGAGGCGAACTCATCGTTCCAGGCCCCGTGC	13	0.03	1	0.02	0	0	0	0	0	0	0	0	0	0	14
	TGAGTCTGGACGGCGAACTCATCGTTCCAGGCCCCGTGC	1	0	0	0	0	0	7	0.02	0	0	1	0.02	4	0.11	13
	AGAGTGTGGACGGCGAACTCATCGTTCCAGGCCCCGTGC	4	0.01	0	0	0	0	1	0	3	0.04	3	0.07	0	0	11
	AGTGTGTAGGCGGCGAACTCATCGTTCCAGGCCCCGTGC	4	0.01	2	0.04	0	0	4	0.01	1	0.01	0	0	0	0	11
	AGTGTATGGTAGGCGAACTCATCGTTCCAGGCCCCGTGC	7	0.01	0	0	0	0	2	0	1	0.01	0	0	0	0	10
	GAGTCTGGACGGCGAACTCATCGTTCCAGGCCCCGTGC	0	0	0	0	0	0	7	0.02	2	0.03	0	0	0	0	9
	ATGTGTGTGGACGGCGAACTCATCGTTCCAGGCCCCGTGC	2	0	0	0	0	0	4	0.01	0	0	2	0.04	0	0	8
	GAGTGCTGACGGCGAACTCATCGTTCCAGGCCCCGTGC	0	0	2	0.04	0	0	5	0.02	0	0	0	0	0	0	7
	AGTGTGTTGACGGCGAACTCATCGTTCCAGGCCCCGTGC	6	0.01	0	0	0	0	1	0	0	0	0	0	0	0	7
	AGTGTCTGTACGGCGAACTCATCGTTCCAGGCCCCGTGC	6	0.01	1	0.02	0	0	0	0	0	0	0	0	0	0	7
	AGTGTGTAGGCGGCAAACTCATCGTTCCAGGCCCCGTGC	6	0.01	0	0	0	0	1	0	0	0	0	0	0	0	7
	GTGAGCGTGGACGGCGAACTCATCGTTCCAGGCCCCGTGC	0	0	0	0	0	0	1	0	1	0.01	3	0.07	0	0	5
	GATGTGCGTGGACGGCGAACTCATCGTTCCAGGCCCCGTGC	0	0	0	0	0	0	1	0	2	0.03	2	0.04	0	0	5
AGTGTTGTAGGGCCCGAACTCATCGTTCCAGGCCCCCGTGC	Total Number of Reads = 2428	Number of Unique Sequences = 259
	AGTGTTGTAGGGCCCGAACTCATCGTTCCAGGCCCCCGTGC	151	0.2	31	0.17	63	0.21	102	0.19	6	0.02	5	0.03	3	0.01	361
	AGTGTTGTAAGGGCCGAACTCATCGTTCCAGGCCCCCGTGC	138	0.18	38	0.21	44	0.15	58	0.1	17	0.07	3	0.01	3	0.01	301
	GGTGTCGTAAGGGCCGAACTCATCGTTCCAGGCCCCCGTGC	5	0	2	0.01	7	0.02	44	0.08	32	0.13	53	0.33	100	0.35	243
	AGTGTTGTAGGGGCCGAACTCATCGTTCCAGGCCCCCGTGC	101	0.13	21	0.11	25	0.08	40	0.07	6	0.02	4	0.02	3	0.01	200
	TGAGTTGTAGGGGCCGAACTCATCGTTCCAGGCCCCCGTGC	9	0.01	2	0.01	9	0.03	41	0.07	15	0.06	19	0.11	41	0.14	136
	GGGTGTTGTAGGGGCCGAACTCATCGTTCCAGGCCCCCGTGC	8	0.01	5	0.02	7	0.02	16	0.02	51	0.21	6	0.03	6	0.02	99
	TGAGTTGTAAGGGCCGAACTCATCGTTCCAGGCCCCCGTGC	12	0.01	1	0	5	0.01	28	0.05	7	0.02	14	0.08	21	0.07	88
	GAGTGTTGTAGGGGCCGAACTCATCGTTCCAGGCCCCCGTGC	27	0.03	9	0.05	12	0.04	16	0.02	2	0	0	0	0	0	66
	AGTGTTGGTAGGGCCGAACTCATCGTTCCAGGCCCCCGTGC	24	0.03	7	0.03	12	0.04	15	0.02	0	0	0	0	3	0.01	61
	AGTGTTGTAAGGGCCGAACTCATCGTTCCAAGGCCCCGTGC	29	0.03	7	0.03	8	0.02	13	0.02	1	0	1	0	1	0	60
	GGTGTTGTAGGGGCCGAACTCATCGTTCCAGGCCCCCGTGC	5	0	2	0.01	3	0.01	3	0	36	0.15	3	0.01	7	0.02	59
	GAGTGTTGTAGGGCCCGAACTCATCGTTCCAGGCCCCCGTGC	11	0.01	5	0.02	6	0.02	8	0.01	1	0	2	0.01	1	0	34
	GGTGTCGTAAGGGCCGAACTCATCGTTCCAGGGCCCCGTGC	0	0	0	0	3	0.01	7	0.01	2	0	9	0.05	8	0.02	29
	AGTGTCGTAGGGGCCGAACTCATCGTTCCAGGCCCCCGTGC	6	0	0	0	6	0.02	9	0.01	3	0.01	2	0.01	2	0	28
	AGTGTTGTGGGGGCCGAACTCATCGTTCCAGGCCCCCGTGC	14	0.01	1	0	4	0.01	5	0	3	0.01	0	0	0	0	27
	AGTGTTGTAGGGCCCGAACTCATCGTTCCAGGCCCCCGTGCC	12	0.01	0	0	4	0.01	6	0.01	0	0	0	0	1	0	23
	AGTGTTGTAGGGACCGAACTCATCGTTCCAGGCCCCCGTGC	9	0.01	5	0.02	5	0.01	2	0	0	0	0	0	0	0	21
	AGTGTTGTAAGGGCCGAACTCATCGTTCCAGGCCCCGGTGC	8	0.01	2	0.01	4	0.01	4	0	1	0	1	0	0	0	20
	AGTGTTGTACGGGCCGAACTCATCGTTCCAGGCCCCCGTGC	10	0.01	0	0	4	0.01	4	0	0	0	0	0	0	0	18
	AGTGTTGTAAGGGCCGAACTCATCGTTCCAGGCCCCAGTGC	8	0.01	1	0	2	0	4	0	2	0	1	0	0	0	18
	TGAGTTGTAAGGGCCGAACTCATCGTTCCAGGCCCCGGTGC	2	0	0	0	1	0	4	0	3	0.01	3	0.01	3	0.01	16
	AGAGTTGTAGGGCCCGAACTCATCGTTCCAGGCCCCCGTGC	3	0	0	0	3	0.01	5	0	1	0	1	0	2	0	15
	TGAGTTGGTAGGGCCGAACTCATCGTTCCAGGCCCCCGTGC	2	0	0	0	0	0	5	0	1	0	2	0.01	5	0.01	15
	AGTGTTGTTAGGGCCGAACTCATCGTTCCAGGCCCCCGTGC	9	0.01	2	0.01	3	0.01	1	0	0	0	0	0	0	0	15
	AGTGTTGGTAGGGCCGAACTCATCGTTCCAGGCCCCGGTGC	5	0	2	0.01	2	0	4	0	0	0	0	0	1	0	14
GTGATGTCGTAGGGCCGAACTCATCGTCCAGGCCCCGTGC	Total Number of Reads = 910	Number of Unique Sequences = 82
	GTGATGTCGTAGGGCCGAACTCATCGTCCAGGCCCCGTGC	1	0.03	0	0	3	0.13	43	0.25	36	0.28	113	0.36	103	0.41	299
	GATGTCGTAGGGCCGAACTCATCGTCCAGGCCCCGTGC	10	0.37	0	0	11	0.47	27	0.15	37	0.29	54	0.17	49	0.19	188
	GATGTCGTAGGGCCGAACTCATCTTCCAGGCCCCGTGC	2	0.07	0	0	1	0.04	25	0.14	13	0.1	33	0.1	16	0.06	90
	GATGTGTCGTAGGGCCGAACTCATCGTCCAGGCCCCGTGC	7	0.25	1	0.33	3	0.13	21	0.12	10	0.08	17	0.05	3	0.01	62
	GGATGTCGTAGGGCCGAACTCATCGTCCAGGCCCCGTGC	0	0	0	0	0	0	5	0.02	4	0.03	29	0.09	14	0.05	52
	GTGATGTCGTAGGGCCGAACTCATCTTCCAGGCCCCGTGC	0	0	0	0	1	0.04	3	0.01	1	0	14	0.04	12	0.04	31
	GTGATGTCGTAGGGCCGAACTCATCGTTCAGGCCCCGTGC	0	0	0	0	0	0	3	0.01	3	0.02	7	0.02	6	0.02	19
	GTGATGTCGTAGGGCCGAACTCATGTTCCAGGCCCCGTGC	2	0.07	0	0	0	0	6	0.03	2	0.01	4	0.01	4	0.01	18
	TGATGTTGTAGGGCCGAACTCATCGTCCAGGCCCCGTGC	0	0	2	0.66	0	0	5	0.02	1	0	2	0	1	0	11
	GTGATGTCGTAGGGCCGAACTCACGTTCCAGGCCCCGTGC	0	0	0	0	0	0	2	0.01	1	0	5	0.01	2	0	10
	GTGAGTTCGTAGGGCCGAACTCATCGTCCAGGCCCCGTGC	0	0	0	0	0	0	2	0.01	1	0	4	0.01	3	0.01	10
	GTGATGTCGTAGGGCCGAACTCATCGTCCAGGCCCCGTGCC	0	0	0	0	0	0	3	0.01	1	0	4	0.01	2	0	10
	GTGAGTTCGTAGGGCCGAACTCATCTTCCAGGCCCCGTGC	0	0	0	0	0	0	4	0.02	1	0	2	0	2	0	9
	GTGATGTCGTAGGGCCGAACTCATCGTTCCGGCCCCGTGC	0	0	0	0	0	0	0	0	1	0	2	0	5	0.02	8
	GTGATGTCGTAGGGCCGAACTCATCGTCCAGGCCCCGTG	0	0	0	0	0	0	1	0	1	0	2	0	2	0	6
GGTGTCGTAGGGCCGAAAAACTCATCGTTCCAGGCCCCGTGC	Total Number of Reads = 764	Number of Unique Sequences = 61
	GGTGTCGTAGGGCCGAAAAACTCATCGTTCCAGGCCCCGTGC	11	0.22	2	0.33	9	0.29	44	0.34	43	0.4	87	0.37	92	0.42	288
	GGTGTCGTAGGGCCGGGGAACTCATCGTTCCAGGCCCCGTGC	2	0.04	0	0	6	0.19	20	0.15	18	0.16	39	0.16	44	0.2	129
	GGTGTCGTAGGGCCGAACCCCTCATCGTTCCAGGCCCCGTGC	3	0.06	0	0	0	0	15	0.11	18	0.16	36	0.15	25	0.11	97
	GGTGTCGTAGGGCCGCTTAACTCATCGTTCCAGGCCCCGTGC	1	0.02	1	0.16	3	0.09	8	0.06	4	0.03	13	0.05	12	0.05	42
	AGTGTTGTAGGGCCGAAAAACTCATCGTTCCAGGCCCCGTGC	18	0.36	1	0.16	5	0.16	8	0.06	3	0.02	0	0	0	0	35
	GGTGTCGTAGGGCCGTGGAACTCATCGTTCCAGGCCCCGTGC	2	0.04	0	0	0	0	4	0.03	3	0.02	13	0.05	4	0.01	26
	TGAGTTGTAGGGCCGAAAAACTCATCGTTCCAGGCCCCGTGC	4	0.08	1	0.16	1	0.03	5	0.03	1	0	4	0.01	4	0.01	20
	GGTGTCGTAGGGCCGAAGGGCTCATCGTTCCAGGCCCCGTGC	0	0	0	0	1	0.03	1	0	3	0.02	7	0.03	6	0.02	18
	GGTGTCGTAGGGCCGTTTAACTCATCGTTCCAGGCCCCGTGC	1	0.02	0	0	0	0	2	0.01	1	0	4	0.01	9	0.04	17
	GGTGTCGTAGGGCCGAACAAATCATCGTTCCAGGCCCCGTGC	0	0	0	0	0	0	4	0.03	2	0.01	3	0.01	5	0.02	14
	GGTGTCGTAGGGCCCGGAAACTCATCGTTCCAGGCCCCGTGC	0	0	0	0	0	0	3	0.02	0	0	3	0.01	2	0	8
GGTGTCGTAGGGCCGAACCTCATTCCGTGCCCAGGCCGTCG	Total Number of Reads = 674	Number of Unique Sequences = 47
	GGTGTCGTAGGGCCGAACCTCATTCCGTGCCCAGGCCGTCG	1	0.25	0	0	3	0.37	20	0.29	10	0.37	134	0.43	112	0.43	280
	GGTGTCGTAGGGCCGAACCTCGTTCCATGCCCAGGCCGTCG	0	0	1	1	1	0.12	12	0.17	1	0.03	42	0.13	57	0.21	114
	GGTGTCGTAGGGCCGAACCTCATTCCATGCCCAGGCCGTCG	0	0	0	0	0	0	7	0.1	3	0.11	44	0.14	43	0.16	97
	GGTGTCGTAGGGCCGAACCTCATTCCGTGCCCAGGCCCGCG	0	0	0	0	1	0.12	8	0.11	3	0.11	39	0.12	20	0.07	71
	GGTGTCGTAGGGCCGAACCTCATTCCGTGCCCGGCCCGTCG	0	0	0	0	0	0	0	0	0	0	11	0.03	3	0.01	14
	GGTGTCGTAGGGCCGAACCTCATTCCGTGCCCAGGCCTGCG	0	0	0	0	1	0.12	0	0	2	0.07	6	0.01	1	0	10
	GGTGTCGTAGGGCCGAACCTCGATCCATGCCCAGGCCGTCG	0	0	0	0	0	0	0	0	1	0.03	2	0	5	0.01	8
	GGTGTCGTAGGGCCGAACCTCATTCCATGCCCAGGCCGTCGC	0	0	0	0	0	0	1	0.01	3	0.11	1	0	3	0.01	8
	GGTGTCGTAGGGCCGAACCTCATTCCATGCCCCGGCCGTCG	0	0	0	0	0	0	0	0	2	0.07	2	0	2	0	6
	GGTGTCGTAGGGCCGAACCTCGTTCCATGCCCAGGCCGTCGC	0	0	0	0	0	0	0	0	0	0	4	0.01	2	0	6
	GGTGTCGTAGGGCCGAACCTCGTTCCGTGCCCAGGCCGTCG	0	0	0	0	0	0	1	0.01	0	0	3	0	1	0	5
	GGGTGTCGTAGGGCCGAACCTCATTCCGTGCCCAGGCCGTCG	0	0	0	0	0	0	0	0	0	0	1	0	3	0.01	4
	GGTGTCGTAGGGCCGAACCTCATTCGATGCCCAGGCCGTCG	0	0	0	0	0	0	1	0.01	0	0	3	0	0	0	4
	TGAGTTGTAGGGCCGAACCTCATTCCGTGCCCAGGCCGTCG	0	0	0	0	0	0	3	0.04	0	0	1	0	0	0	4
ATGATGTTGTAGGGCCGAACTCATCGTTCCAGGCCCCGTGC	Total Number of Reads = 2625	Number of Unique Sequences = 98
	ATGATGTTGTAGGGCCGAACTCATCGTTCCAGGCCCCGTGC	221	0.42	27	0.36	87	0.44	621	0.53	48	0.27	58	0.21	26	0.11	1088
	GTGATGTTGTAGGGCCGAACTCATCGTTCCAGGCCCCGTGC	27	0.05	9	0.12	38	0.19	341	0.29	67	0.37	129	0.48	140	0.59	751
	AGTGTTGTTGTAGGGCCGAACTCATCGTTCCAGGCCCCGTGC	159	0.3	19	0.26	40	0.2	54	0.04	0	0	3	0.01	0	0	275
	GGTGTCGTTTTAGGGCCGAACTCATCGTTCCAGGCCCCGTGC	5	0	0	0	2	0.01	20	0.01	22	0.12	43	0.16	46	0.19	138
	AGTGTTTTTGTAGGGCCGAACTCATCGTTCCAGGCCCCGTGC	15	0.02	4	0.05	2	0.01	13	0.01	4	0.02	1	0	0	0	39
	GTGGAGTTGTAGGGCCGAACTCATCGTTCCAGGCCCCGTGC	2	0	0	0	0	0	11	0	2	0.01	8	0.03	3	0.01	26
	GATGATGTTGTAGGGCCGAACTCATCGTTCCAGGCCCCGTGC	1	0	0	0	2	0.01	17	0.01	3	0.01	0	0	0	0	23
	TGAGTTTTTGTAGGGCCGAACTCATCGTTCCAGGCCCCGTGC	1	0	1	0.01	3	0.01	5	0	3	0.01	3	0.01	6	0.02	22
	AGTTTTGTTGTAGGGCCGAACTCATCGTTCCAGGCCCCGTGC	8	0.01	2	0.02	3	0.01	6	0	0	0	0	0	0	0	19
	AGTGTTGGGGTAGGGCCGAACTCATCGTTCCAGGCCCCGTGC	6	0.01	2	0.02	3	0.01	4	0	2	0.01	1	0	0	0	18
	AGTGTTGTTTTAGGGCCGAACTCATCGTTCCAGGCCCCGTGC	8	0.01	3	0.04	1	0	6	0	0	0	0	0	0	0	18
	ATGATGTTGTAGGGCCGAACTCATCGTTCCAGGCCCCATGC	3	0	0	0	3	0.01	5	0	4	0.02	2	0	0	0	17
	AGGGGTGTTGTAGGGCCGAACTCATCGTTCCAGGCCCCGTGC	6	0.01	1	0.01	2	0.01	5	0	0	0	1	0	0	0	15
GATGTGTGTAGGGCCGAACTCATCGTTCCAGGCCCCGTGC	Total Number of Reads = 56641	Number of Unique Sequences = 135
	GATGTGTGTAGGGCCGAACTCATCGTTCCAGGCCCCGTGC	4835	0.93	745	0.95	3153	0.95	24364	0.95	5865	0.95	11643	0.96	3490	0.93	54095
	GTGTGTGTAGGGCCGAACTCATCGTTCCAGGCCCCGTACG	57	0.01	5	0	24	0	257	0.01	47	0	138	0.01	143	0.03	671
GGTGTCGTAGGGCCGAACCTCATCGTGCCCAGGCCCGTCG	Total Number of Reads = 944	Number of Unique Sequences = 76
	GGTGTCGTAGGGCCGAACCTCATCGTGCCCAGGCCCGTCG	0	0	0	0	0	0	32	0.29	6	0.06	164	0.34	59	0.23	261
	GGTGTCGTAGGGCCGAACCTCATCGTTCCCAGGCCCGTCGC	3	0.33	0	0	9	0.64	17	0.15	38	0.4	66	0.14	75	0.3	208
	GGTGTCGTAGGGCCGAACCTCATCCTGCCCAGGCCCGTCG	0	0	0	0	0	0	10	0.09	12	0.12	60	0.12	30	0.12	112
	GGTGTCGTAGGGCCGAACCTCATCGTTCCCAGGCCCGTCG	0	0	0	0	1	0.07	9	0.08	3	0.03	17	0.03	26	0.1	56
	GGTGTCGTAGGGCCGAACCTCATCCTGCCCAGGCCTGTCG	0	0	0	0	0	0	1	0	11	0.11	18	0.03	7	0.02	37
	GGTGTCGTAGGGCCGAACCTCATCGTGCCCAGGCCCGTG	0	0	0	0	0	0	6	0.05	1	0.01	16	0.03	3	0.01	26
	GGTGTCGTAGGGCCGAACCTCATCGATCCCAGGCCCGTCG	0	0	0	0	0	0	4	0.03	1	0.01	8	0.01	7	0.02	20
	GGTGTCGTAGGGCCGAACCTCATCGTGCCCAGGCCCGTCGC	0	0	0	0	0	0	0	0	2	0.02	12	0.02	5	0.02	19
	GGTGTCGTAGGGCCGAACCTCTTCCTGCCCAGGCCCGTCG	0	0	0	0	0	0	3	0.02	1	0.01	10	0.02	4	0.01	18
	GGTGTCGTAGGGCCGAACCTCATCGTGCCCAGGCCCGTGC	0	0	0	0	0	0	0	0	3	0.03	11	0.02	3	0.01	17
	GTGTCGTAGGGCCGAACCTCATCGTGCCCAGGCCCGTCG	1	0.11	0	0	0	0	8	0.07	3	0.03	3	0	1	0	16
	GGTGTCGTAGGGCCGAACCTCATCCTGCCCAGGCCCGTCGC	0	0	0	0	0	0	0	0	3	0.03	8	0.01	2	0	13
	GGTGTCGTAGGGCCGAACCTCATTCTGCCCAGGCCCGTCG	0	0	0	0	0	0	2	0.01	0	0	9	0.01	2	0	13
	GGTGTCGTAGGGCCGAACCTCATCGTGCCCAGGCCTGTCG	0	0	0	0	0	0	0	0	1	0.01	4	0	3	0.01	8
	GGGTGTCGTAGGGCCGAACCTCATCGTTCCCAGGCCCGTCGC	0	0	0	0	1	0.07	1	0	2	0.02	2	0	2	0	8
	GGTGTCGTAGGGCCGAACCTCTCCGTGCCCAGGCCCGTCG	0	0	0	0	0	0	0	0	0	0	7	0.01	0	0	7
	GGTGTCGTAGGGCCGAACCTCATCGTGCCCAGGCCCTGCG	0	0	0	0	0	0	0	0	0	0	4	0	2	0	6
GGTGTCGTAGGGCCGAACTCATCGTTCCAGGCCCCCCCGTGC	Total Number of Reads = 558	Number of Unique Sequences = 80
	GGTGTCGTAGGGCCGAACTCATCGTTCCAGGCCCCCCCGTGC	6	0.15	4	0.26	9	0.34	35	0.38	46	0.59	76	0.54	83	0.48	259
	AGTGTTGTAGGGCCGAACTCATCGTTCCAGGCCCCCCCGTGC	21	0.55	6	0.4	12	0.46	10	0.1	6	0.07	0	0	0	0	55
	GGTGTCGTAGGGCCGAACTCATCGTTCCAGGCCCCACCGTGC	0	0	1	0.06	0	0	1	0.01	3	0.03	14	0.1	9	0.05	28
	GGTGTCGTAGGGCCGAACTCATCGTTCCAGGCCCCTCCGTGC	0	0	1	0.06	0	0	4	0.04	1	0.01	10	0.07	6	0.03	22
	GGTGTCGTAGGGCCGAACTCATCGTTCCAGGGGCCCCCGTGC	0	0	0	0	0	0	2	0.02	4	0.05	6	0.04	8	0.04	20
	GGTGTCGTAGGGCCGAACTCATCGTTCCAGGCCCCTTTGTGC	0	0	0	0	0	0	2	0.02	0	0	8	0.05	5	0.02	15
	GGTGTCGTAGGGCCGAACTCATCGTTCCAGGCCCCAAAGTGC	0	0	0	0	0	0	2	0.02	5	0.06	3	0.02	4	0.02	14
	GGTGTCGTAGGGCCGAACTCATCGTTCCAGGCCCCCACGTGC	0	0	0	0	0	0	3	0.03	1	0.01	0	0	6	0.03	10
	GGTGTCGTAGGGCCGAACTCATCGTTCCAGGCCCCCTCGTGC	0	0	0	0	0	0	3	0.03	1	0.01	1	0	3	0.01	8
	GGTGTCGTAGGGCCGAACTCATCGTTCCAGGCCCCTCGTCGC	0	0	0	0	0	0	2	0.02	1	0.01	2	0.01	2	0.01	7
	GGTGTCGTAGGGCCGAACTCATCGTTCCAGGGCCCCCCGTGC	0	0	0	0	0	0	0	0	1	0.01	0	0	5	0.02	6
	AGTGTCGTAGGGCCGAACTCATCGTTCCAGGCCCCCCCGTGC	1	0.02	0	0	1	0.03	4	0.04	0	0	0	0	0	0	6
	GGTGTCGTAGGGCCGAACTCATCGTTCCAAGGCCCCCGGTGC	1	0.02	0	0	1	0.03	0	0	0	0	1	0	3	0.01	6
	GGTGTCGTAGGGCCGAACTCATCGTTCCAGGCCCCCCCGTG	0	0	0	0	1	0.03	0	0	2	0.02	0	0	2	0.01	5
	GGTGTCGTAGGGCCGAACTCATCGTTCCAGGCCCCCGTTTGC	0	0	0	0	0	0	2	0.02	1	0.01	0	0	2	0.01	5
	GGTGTCGTAGGGCCGAACTCATCGTTCCAGGGCCCCCGGTGC	1	0.02	0	0	0	0	2	0.02	0	0	2	0.01	0	0	5
	GGTGTCGTAGGGCCGAACTCATCGTTCCAGGCCCCCCGGTGC	0	0	0	0	0	0	0	0	1	0.01	1	0	2	0.01	4
	GTGTCGTAGGGCCGAACTCATCGTTCCAGGCCCCCCCGTGC	0	0	0	0	0	0	0	0	0	0	2	0.01	2	0.01	4
	GGTGTCGTAGGGCCGAACTCATCGTTCCAAGGCCCCCCGTGC	0	0	0	0	0	0	0	0	0	0	2	0.01	1	0	3
	AGTGTTGTAGGGCCGAACTCATCGTTCCAGGCCCCTCCGTGC	0	0	0	0	0	0	3	0.03	0	0	0	0	0	0	3
	GGTGTCGTAGGGCCGAACTCATCGTTCCAGGGCCCCCTGTGC	1	0.02	0	0	0	0	0	0	0	0	0	0	2	0.01	3
GGTGTCGTAGGGCCGAACTCATCGTTCCCAGGCCCGTGC	Total Number of Reads = 10787	Number of Unique Sequences = 224
	GGTGTCGTAGGGCCGAACTCATCGTTCCCAGGCCCGTGC	81	0.44	88	0.38	256	0.6	842	0.62	892	0.57	2384	0.67	2186	0.62	6729
	GGTGTCGTAGGGCCGAACTCATCGTTGCCAGGCCCGTGC	25	0.13	101	0.44	102	0.24	261	0.19	414	0.26	708	0.2	785	0.22	2396
	GGTGTCGTAGGGCCGAACTCATCGATTCCAGGCCCGTGC	3	0.01	2	0	6	0.01	42	0.03	49	0.03	67	0.01	89	0.02	258
	GGTGTCGTAGGGCCGAACTCATCGGTTCCAGGCCCGTGC	3	0.01	1	0	7	0.01	27	0.01	23	0.01	72	0.02	64	0.01	197
	GGTGTCGTAGGGCCGAACTCATCCGTTCCAGGCCCGTGC	6	0.03	5	0.02	3	0	17	0.01	26	0.01	59	0.01	54	0.01	170
	GGTGTCGTAGGGCCGAACTCATCGTTACCAGGCCCGTGC	1	0	1	0	5	0.01	22	0.01	24	0.01	35	0	55	0.01	143
	GGTGTCGTAGGGCCGAACTCATCGTTGCCAGGCCCGTG	3	0.01	2	0	8	0.01	27	0.01	21	0.01	38	0.01	41	0.01	140
	GGTGTCGTAGGGCCGAACTCATCGTTTCCAGGCCCGTGC	3	0.01	0	0	2	0	8	0	9	0	8	0	30	0	60
GGTTAGAGGCGACGTCCCGGAATCCGCGCCCATTGCCCCC	Total Number of Reads = 308	Number of Unique Sequences = 8
	GGTTAGAGGCGACGTCCCGGAATCCGCGCCCATTGCCCCC	251	0.81	0	0	0	0	1	1	0	0	0	0	0	0	252
	GGTTAGAGGCGACGTCCCGGAATCCGCGCCCATTGCCCC	29	0.09	0	0	0	0	0	0	0	0	0	0	0	0	29
	GGTTAGAGGCGACGTCCCGGAATCCGCGCCCATTGCCCCCC	16	0.05	0	0	0	0	0	0	0	0	0	0	0	0	16
	GGGTTAGAGGCGACGTCCCGGAATCCGCGCCCATTGCCCCC	6	0.01	0	0	0	0	0	0	0	0	0	0	0	0	6
	GGTTAGAGGCGACGTCCCGGAATCCGCGCCCATTACCCCC	2	0	0	0	0	0	0	0	0	0	0	0	0	0	2
GGTGTCGTAGGGCCGAACTCATCGTTCCAGGCCCCCCGTGC	Total Number of Reads = 4222	Number of Unique Sequences = 278
	GGTGTCGTAGGGCCGAACTCATCGTTCCAGGCCCCCCGTGC	18	0.02	15	0.08	41	0.1	144	0.16	133	0.28	272	0.36	272	0.32	895
	GGTGTCGTAGGGCCGAACTCATCGTTCCAGGCCCACCGTGC	10	0.01	10	0.05	13	0.03	42	0.04	52	0.11	111	0.15	92	0.1	330
	GGTGTCGTAGGGCCGAACTCATCGTTCCAGGCCCCACGTGC	7	0	3	0.01	16	0.04	69	0.08	49	0.1	75	0.1	87	0.1	306
	AGTGTTGTAGGGCCGAACTCATCGTTCCAGGCCCCCCGTGC	100	0.13	21	0.11	44	0.11	60	0.06	8	0.01	3	0	2	0	238
	GGTGTCGTAGGGCCGAACTCATCGTTCCAGGCCCCCAGTGC	2	0	2	0.01	9	0.02	25	0.02	24	0.05	53	0.07	74	0.08	189
	GGTGTCGTAGGGCCGAACTCATCGTTCCAGGCCCCTCGTGC	5	0	1	0	13	0.03	18	0.02	29	0.06	60	0.08	49	0.05	175
	AGTGTTGTAGGGCCGAACTCATCGTTCCAGGGCCCCCGTGC	64	0.08	15	0.08	19	0.04	28	0.03	8	0.01	1	0	0	0	135
	AGTGTTGTAGGGCCGAACTCATCGTTCCAAGGCCCCCGTGC	46	0.06	12	0.06	33	0.08	35	0.04	3	0	3	0	1	0	133
	TGAGTTGTAGGGCCGAACTCATCGTTCCAGGCCCCCCGTGC	11	0.01	1	0	6	0.01	50	0.05	13	0.02	12	0.01	39	0.04	132
	AGTGTTGTAGGGCCGAACTCATCGTTCCAGGCCCCACGTGC	54	0.07	14	0.07	13	0.03	15	0.01	6	0.01	0	0	0	0	102
	TGAGTTGTAGGGCCGAACTCATCGTTCCAGGGCCCCCGTGC	9	0.01	3	0.01	5	0.01	23	0.02	7	0.01	10	0.01	21	0.02	78
	GGGTGTCGTAGGGCCGAACTCATCGTTCCAGGCCCCCCGTGC	4	0	2	0.01	2	0	21	0.02	13	0.02	9	0.01	27	0.03	78
	GGTGTCGTAGGGCCGAACTCATCGTTCCAGGCCCCCTGTGC	2	0	0	0	0	0	10	0.01	8	0.01	14	0.01	42	0.04	76
	AGTGTTGTAGGGCCGAACTCATCGTTCCAGGGGCCCCGTGC	25	0.03	9	0.04	6	0.01	19	0.02	2	0	2	0	0	0	63
	AGTGTTGTAGGGCCGAACTCATCGTTCCAGGCCCCCTGT	38	0.05	8	0.04	10	0.02	2	0	0	0	0	0	0	0	58
	AGTGTTGTAGGGCCGAACTCATCGTTCCAAAGGCCCCGTGC	24	0.03	6	0.03	5	0.01	14	0.01	2	0	1	0	0	0	52
	AGTGTTGTAGGGCCGAACTCATCGTTCCAGGCCCACCGTGC	20	0.02	3	0.01	9	0.02	12	0.01	5	0.01	0	0	1	0	50
	TGAGTTGTAGGGCCGAACTCATCGTTCCAGGCCCCACGTGC	2	0	4	0.02	1	0	12	0.01	8	0.01	2	0	19	0.02	48
	AGTGTTGTAGGGCCGAACTCATCGTTCCAGGCCCCGGGTGC	18	0.02	4	0.02	10	0.02	13	0.01	0	0	2	0	0	0	47
	GGTGTTGTAGGGCCGAACTCATCGTTCCAGGCCCCCGGTGC	5	0	1	0	3	0	16	0.01	3	0	7	0	6	0	41
	AGTGTTGTAGGGCCGAACTCATCGTTCCAGGCCCCCGGTGC	15	0.02	2	0.01	5	0.01	15	0.01	3	0	0	0	0	0	40
	AGTGTTGTAGGGCCGAACTCATCGTTCCAGGCCCCTCGTGC	16	0.02	5	0.02	4	0.01	9	0.01	1	0	1	0	0	0	36
	TGAGTTGTAGGGCCGAACTCATCGTTCCAGGCCCCCGGTGC	2	0	1	0	3	0	8	0	2	0	7	0	11	0.01	34
	GGGTGTCGTAGGGCCGAACTCATCGTTCCAGGCCCCCAGTGC	2	0	0	0	1	0	6	0	7	0.01	6	0	11	0.01	33
	AGTGTTGTAGGGCCGAACTCATCGTTCCAGGCCCCCGTAGC	20	0.02	2	0.01	3	0	5	0	1	0	1	0	0	0	32
	AGTGTTGTAGGGCCGAACTCATCGTTCCAGGCCCCCTGCG	9	0.01	3	0.01	5	0.01	11	0.01	0	0	1	0	3	0	32
	AGTGTTGTAGGGCCGAACTCATCGTTCCAGGCCCCCAGTGC	16	0.02	1	0	4	0.01	2	0	4	0	0	0	1	0	28
	TGAGTTGTAGGGCCGAACTCATCGTTCCAGGCCCACCGTGC	2	0	1	0	4	0.01	7	0	4	0	3	0	3	0	24
	GGTGTCGTAGGGCCGAACTCATCGTTCCAGGCCCCTCGTGCC	0	0	0	0	0	0	3	0	5	0.01	8	0.01	8	0	24
	TGAGTTGTAGGGCCGAACTCATCGTTCCAGGCCCCTCGTGC	1	0	0	0	2	0	5	0	3	0	5	0	7	0	23
CAAGGCTGGGGTTTACATGAGGTCCTCACTTGTCCCGCCC	Total Number of Reads = 257	Number of Unique Sequences = 10
	CAAGGCTGGGGTTTACATGAGGTCCTCACTTGTCCCGCCC	230	0.92	4	1	0	0	3	1	0	0	0	0	0	0	237
	CAAGGCTGGGGTTTACATGAGGTCCTCACTTGTCCCGCCCC	10	0.04	0	0	0	0	0	0	0	0	0	0	0	0	10
	CAAGCTGGGGTTTACATGAGGTCCTCACTTGTCCCGCCC	3	0.01	0	0	0	0	0	0	0	0	0	0	0	0	3
AGTGTATTGGACGGCGAACTCATCGTTCCAGGCCCCGTGC	Total Number of Reads = 1048	Number of Unique Sequences = 80
	AGTGTATTGGACGGCGAACTCATCGTTCCAGGCCCCGTGC	129	0.22	9	0.17	15	0.15	77	0.27	0	0	3	0.14	1	0.2	234
	AGTGTGTTGGACGGCGAACTCATCGTTCCAGGCCCCGTGC	122	0.21	9	0.17	19	0.19	40	0.14	2	0.08	0	0	1	0.2	193
	AGTGTGTAGGACGGCGAACTCATCGTTCCAGGCCCCGTGC	96	0.16	10	0.19	24	0.24	33	0.11	9	0.37	1	0.04	1	0.2	174
	AGTGTCTAGGACGGCGAACTCATCGTTCCAGGCCCCGTGC	77	0.13	12	0.23	18	0.18	44	0.15	0	0	1	0.04	0	0	152
	AGTGTCGTGGACGGCGAACTCATCGTTCCAGGCCCCGTGC	41	0.07	2	0.03	9	0.09	11	0.03	5	0.2	1	0.04	1	0.2	70
	AGTGTAGTGGACGGCGAACTCATCGTTCCAGGCCCCGTGC	21	0.03	2	0.03	3	0.03	15	0.05	2	0.08	0	0	0	0	43
	AGTGTATGGTACGGCGAACTCATCGTTCCAGGCCCCGTGC	18	0.03	2	0.03	3	0.03	8	0.02	2	0.08	1	0.04	0	0	34
	GATGTATTGGACGGCGAACTCATCGTTCCAGGCCCCGTGC	2	0	0	0	0	0	8	0.02	0	0	2	0.09	0	0	12
	AGAGTGTTGGACGGCGAACTCATCGTTCCAGGCCCCGTGC	6	0.01	0	0	1	0.01	3	0.01	0	0	0	0	0	0	10
	GATGCGTTGGACGGCGAACTCATCGTTCCAGGCCCCGTGC	3	0	0	0	0	0	1	0	0	0	4	0.19	0	0	8
	GATGTGCTGGACGGCGAACTCATCGTTCCAGGCCCCGTGC	1	0	0	0	0	0	5	0.01	0	0	1	0.04	0	0	7
	AGTGTATAGGACGGCGAACTCATCGTTCCAGGCCCCGTGC	3	0	0	0	1	0.01	3	0.01	0	0	0	0	0	0	7
	AGTGTATCGGACGGCGAACTCATCGTTCCAGGCCCCGTGC	6	0.01	0	0	0	0	0	0	0	0	0	0	0	0	6
	AGTGTATTGGTAGGCGAACTCATCGTTCCAGGCCCCGTGC	3	0	0	0	0	0	3	0.01	0	0	0	0	0	0	6
GGTGTCGGTAGGGACCGAACTCATCGTTCCCAGGCCCCGTGC	Total Number of Reads = 306	Number of Unique Sequences = 48
	GGTGTCGGTAGGGACCGAACTCATCGTTCCCAGGCCCCGTGC	4	0.36	4	0.66	9	0.9	32	0.69	47	0.75	72	0.82	60	0.71	228
	AGTGTTGGTAGGGACCGAACTCATCGTTCCCAGGCCCCGTGC	5	0.45	2	0.33	1	0.1	1	0.02	2	0.03	0	0	0	0	11
	GGTGTCGGTAGGGCCCGAACTCATCGTTCCCAGGCCCCGTGC	0	0	0	0	0	0	1	0.02	2	0.03	2	0.02	1	0.01	6
	GGTGTCGGTAAGGGCCGAACTCATCGTTCCCAGGCCCCGTGC	0	0	0	0	0	0	0	0	0	0	3	0.03	1	0.01	4
	GTGTGTGTAGGGCCCGAACTCATCGTTCCCAGGCCCCGTGC	0	0	0	0	0	0	1	0.02	0	0	0	0	2	0.02	3
	AGTGTTGCTAGGGACCGAACTCATCGTTCCCAGGCCCCGTGC	0	0	0	0	0	0	3	0.06	0	0	0	0	0	0	3
	GTGTGTGTAGGGACCGAACTCATCGTTCCCAGGCCCCGTGC	0	0	0	0	0	0	0	0	1	0.01	0	0	2	0.02	3
	GGTGTCGGTAGGGGCCGAACTCATCGTTCCCAGGCCCCGTGC	0	0	0	0	0	0	0	0	1	0.01	1	0.01	0	0	2
	GGTGTCCGTAGGGCCCGAACTCATCGTTCCCAGGCCCCGTGC	0	0	0	0	0	0	0	0	1	0.01	0	0	1	0.01	2
	GGTGTCGGTAGGGACCGAACTCATCGTTCCCAGGCCCCGTCG	0	0	0	0	0	0	0	0	0	0	0	0	2	0.02	2
	TGAGTTGGTAGGGACCGAACTCATCGTTCCCAGGCCCCGTGC	0	0	0	0	0	0	0	0	1	0.01	0	0	1	0.01	2
	GGTGTCGGTAGGGCCCGAACCCATCGTTCCCAGGCCCCGTGC	0	0	0	0	0	0	0	0	2	0.03	0	0	0	0	2
	GGTGTCGGTAGGGCCCGAACTCATCGTTCCAGGCCCCCGTGC	0	0	0	0	0	0	0	0	0	0	0	0	2	0.02	2
	GGTGTCGGTAGGGCCGGAACTCATCGTTCCCAGGCCCCGTGC	0	0	0	0	0	0	0	0	0	0	1	0.01	1	0.01	2
GGTGTCGTAGGGCCGAAACTCATCGGTTCCAGGCCCCGTGC	Total Number of Reads = 2082	Number of Unique Sequences = 200
	GGTGTCGTAGGGCCGAAACTCATCGGTTCCAGGCCCCGTGC	8	0.07	4	0.11	17	0.17	55	0.18	39	0.17	107	0.18	139	0.18	369
	GGTGTCGTAGGGCCGAAACTCATCGTTTCCAGGCCCCGTGC	3	0.02	4	0.11	10	0.1	23	0.07	26	0.11	46	0.07	125	0.16	237
	GGTGTCGTAGGGCCGAAACTCATCCGTTCCAGGCCCCGTGC	0	0	3	0.08	8	0.08	19	0.06	27	0.11	90	0.15	70	0.09	217
	GGTGTCGTAGGGCCGAAACTCATCGATTCCAGGCCCCGTGC	2	0.01	4	0.11	8	0.08	13	0.04	19	0.08	49	0.08	48	0.06	143
	GGTGTCGTAGGGCCGAAACTCATTCGTTCCAGGCCCCGTGC	0	0	0	0	3	0.03	12	0.04	7	0.03	34	0.05	55	0.07	111
	AGTGTTGTAGGGCCGAAACTCATCCGTTCCAGGCCCCGTGC	38	0.33	8	0.22	15	0.15	27	0.09	3	0.01	1	0	3	0	95
	GGTGTCGTAGGGCCGAAACTCAATCGTTCCAGGCCCCGTGC	2	0.01	1	0.02	1	0.01	5	0.01	12	0.05	27	0.04	22	0.02	70
	TGAGTTGTAGGGCCGAAACTCATCCGTTCCAGGCCCCGTGC	2	0.01	0	0	4	0.04	17	0.05	5	0.02	11	0.01	19	0.02	58
	GGTGTCGTAGGGCCGAAACTCGATCGTTCCAGGCCCCGTGC	0	0	0	0	0	0	7	0.02	6	0.02	20	0.03	24	0.03	57
	GGGTGTCGTAGGGCCGAAACTCATCGTTTCCAGGCCCCGTGC	3	0.02	1	0.02	5	0.05	3	0.01	6	0.02	14	0.02	25	0.03	57
	GGGTGTCGTAGGGCCGAAACTCATCCGTTCCAGGCCCCGTGC	1	0	0	0	0	0	2	0	4	0.01	12	0.02	20	0.02	39
	GGGTGTCGTAGGGCCGAAACTCATCGGTTCCAGGCCCCGTGC	0	0	0	0	2	0.02	8	0.02	5	0.02	9	0.01	9	0.01	33
	AGTGTTGTAGGGCCGAAACTCATTCGTTCCAGGCCCCGTGC	16	0.14	2	0.05	4	0.04	7	0.02	1	0	1	0	1	0	32
	GGTGTCGTAGGGCCGAAACTCCATCGTTCCAGGCCCCGTGC	0	0	0	0	0	0	2	0	3	0.01	8	0.01	12	0.01	25
	GGTGTCGTAGGGCCGAACTTCATCGGTTCCAGGCCCCGTGC	0	0	0	0	0	0	2	0	3	0.01	10	0.01	8	0.01	23
	GGTGTCGTAGGGCCGAAGCTCATCGATTCCAGGCCCCGTGC	0	0	0	0	0	0	3	0.01	6	0.02	10	0.01	3	0	22
	GGTGTCGTAGGGCCGAACTTCATCCGTTCCAGGCCCCGTGC	0	0	0	0	1	0.01	2	0	0	0	9	0.01	9	0.01	21
	TGAGTTGTAGGGCCGAAACTCATTCGTTCCAGGCCCCGTGC	5	0.04	2	0.05	2	0.02	4	0.01	1	0	3	0	4	0	21
	GGTGTCGTAGGGCCGGAACTCATCGGTTCCAGGCCCCGTGC	0	0	0	0	0	0	7	0.02	4	0.01	3	0	6	0	20
	GGTGTCGTAGGGACCGAACTCATCCGTTCCAGGCCCCGTGC	1	0	1	0.02	0	0	3	0.01	1	0	2	0	6	0	14
	GGGTGTCGTAGGGCCGAAACTCATTCGTTCCAGGCCCCGTGC	1	0	0	0	0	0	3	0.01	0	0	5	0	5	0	14
	GGTGTCGTAGGGCCGGAACTCATCCGTTCCAGGCCCCGTGC	0	0	0	0	1	0.01	0	0	2	0	5	0	3	0	11
	GGTGTCGTAGGGCCGGAACTCATCGATTCCAGGCCCCGTGC	0	0	0	0	0	0	1	0	1	0	7	0.01	2	0	11
	GGTGTCGTAGGGCCCGAACTCATCCGTTCCAGGCCCCGTGC	0	0	0	0	1	0.01	0	0	1	0	6	0.01	3	0	11
GATGTCTGGTACGGCAACTCATCGTTCCAGGCCCCGTGC	Total Number of Reads = 529	Number of Unique Sequences = 45
	GATGTCTGGTACGGCAACTCATCGTTCCAGGCCCCGTGC	36	0.23	9	0.4	11	0.33	86	0.39	32	0.66	20	0.57	11	0.45	205
	AGTGTCTGGTACGGCAACTCATCGTTCCAGGCCCCGTGC	89	0.58	12	0.54	16	0.48	50	0.23	1	0.02	0	0	0	0	168
	TGAGTCTGGTACGGCAACTCATCGTTCCAGGCCCCGTGC	4	0.02	0	0	2	0.06	21	0.09	3	0.06	4	0.11	6	0.25	40
	AGATGTGTGGTACGGCAACTCATCGTTCCAGGCCCCGTGC	5	0.03	0	0	0	0	9	0.04	0	0	0	0	0	0	14
	AGAGTCTGGTACGGCAACTCATCGTTCCAGGCCCCGTGC	1	0	0	0	1	0.03	7	0.03	1	0.02	1	0.02	0	0	11
	GTGTCTGGTACGGCAACTCATCGTTCCAGGCCCCGTGC	1	0	1	0.04	0	0	6	0.02	1	0.02	2	0.05	0	0	11
	GGTGCGTGGTACGGCAACTCATCGTTCCAGGCCCCGTGC	0	0	0	0	0	0	2	0	3	0.06	4	0.11	2	0.08	11
	GATGTATTGGACGGCAACTCATCGTTCCAGGCCCCGTGC	0	0	0	0	0	0	5	0.02	0	0	1	0.02	0	0	6
	GATGTCTTGGACGGCAACTCATCGTTCCAGGCCCCGTGC	0	0	0	0	2	0.06	2	0	1	0.02	0	0	0	0	5
	GATGTATGGTACGGCAACTCATCGTTCCAGGCCCCGTGC	0	0	0	0	1	0.03	2	0	1	0.02	0	0	0	0	4
	GATGCGTGGTACGGCAACTCATCGTTCCAGGCCCCGTGC	2	0.01	0	0	0	0	1	0	0	0	0	0	1	0.04	4
	GATGTCTAGGTCGGCAACTCATCGTTCCAGGCCCCGTGC	0	0	0	0	0	0	3	0.01	0	0	0	0	1	0.04	4
	TGATGTGTGGTACGGCAACTCATCGTTCCAGGCCCCGTGC	0	0	0	0	0	0	4	0.01	0	0	0	0	0	0	4
	GATGTGTCGTAGGGCAACTCATCGTTCCAGGCCCCGTGC	0	0	0	0	0	0	2	0	1	0.02	0	0	0	0	3
	ATGTGTCTGGTACGGCAACTCATCGTTCCAGGCCCCGTGC	1	0	0	0	0	0	1	0	1	0.02	0	0	0	0	3
GGTGTCGTAGGGCCGAACTATCGTTCCCAGGCCCCGTGC	Total Number of Reads = 1193	Number of Unique Sequences = 148
	GGTGTCGTAGGGCCGAACTATCGTTCCCAGGCCCCGTGC	3	0.07	4	0.19	4	0.08	36	0.2	26	0.16	65	0.21	62	0.13	200
	GGTGTCGTAGGGCCGAATCATCGTTCCCAGGCCCCGTGC	3	0.07	4	0.19	10	0.22	35	0.19	10	0.06	47	0.15	73	0.16	182
	GGTGTCGTAGGGCCGAACTATCGTTCCAAGGCCCCGTGC	3	0.07	2	0.09	5	0.11	26	0.14	32	0.2	38	0.12	75	0.16	181
	GGTGTCGTAGGGCCGAACTCACGTTCCCAGGCCCCGTGC	2	0.05	0	0	3	0.06	3	0.01	7	0.04	19	0.06	23	0.05	57
	GGTGTCGTAGGGCCGAACTATCGGTTCCAGGCCCCGTGC	1	0.02	0	0	5	0.11	10	0.05	5	0.03	10	0.03	10	0.02	41
	GGTGTCGTAGGGCCGAACTCTCGTTCCCAGGCCCCGTGC	0	0	0	0	0	0	4	0.02	5	0.03	7	0.02	19	0.04	35
	GGTGTCGTAGGGCCGAACTATCGTTGCCAGGCCCCGTGC	2	0.05	0	0	1	0.02	5	0.02	1	0	11	0.03	10	0.02	30
	GGTGTCGTAGGGCCGAACTCTCGTTCCAAGGCCCCGTGC	0	0	1	0.04	1	0.02	1	0	1	0	9	0.02	17	0.03	30
	GGTGTCGTAGGGCCGAACTCACGTTCCAAGGCCCCGTGC	1	0.02	0	0	0	0	3	0.01	5	0.03	11	0.03	10	0.02	30
	GGTGTCGTAGGGCCGAACTATCGTTCCAGGGCCCCGTGC	2	0.05	0	0	1	0.02	8	0.04	2	0.01	5	0.01	11	0.02	29
	GGTGTCGTAGGGCCGAACTATCGATTCCAGGCCCCGTGC	1	0.02	0	0	0	0	5	0.02	4	0.02	9	0.02	8	0.01	27
	GGTGTCGTAGGGCCGAACTCACGTTGCCAGGCCCCGTGC	0	0	2	0.09	0	0	3	0.01	3	0.01	10	0.03	2	0	20
	GGTGTCGTAGGGCCGAACTATCGTTTCCAGGCCCCGTGC	0	0	0	0	2	0.04	0	0	5	0.03	6	0.01	6	0.01	19
	AGTGTTGTAGGGCCGAACTATCGTTCCCAGGCCCCGTGC	8	0.2	1	0.04	4	0.08	5	0.02	0	0	0	0	1	0	19
	GGTGTCGTAGGGCCGAATCATCGTTTCCAGGCCCCGTGC	0	0	0	0	0	0	5	0.02	0	0	5	0.01	5	0.01	15
	TGAGTTGTAGGGCCGAACTATCGTTCCCAGGCCCCGTGC	3	0.07	1	0.04	1	0.02	0	0	4	0.02	1	0	4	0	14
	GGTGTTGTAGGGCCGAATCATCGTTCCCAGGCCCCGTGC	1	0.02	2	0.09	2	0.04	1	0	5	0.03	1	0	1	0	13
	GGGTGTCGTAGGGCCGAACTATCGTTCCCAGGCCCCGTGC	0	0	1	0.04	0	0	1	0	0	0	3	0	7	0.01	12
	GTGTCGTAGGGCCGAATCATCGTTCCCAGGCCCCGTGC	0	0	0	0	0	0	3	0.01	0	0	1	0	7	0.01	11
	GGTGTCGTAGGGCCGAACTCTCGATTCCAGGCCCCGTGC	1	0.02	0	0	0	0	1	0	1	0	5	0.01	3	0	11
	GGGTGTCGTAGGGCCGAACTATCGTTCCAAGGCCCCGTGC	0	0	0	0	0	0	1	0	4	0.02	0	0	4	0	9
	GGTGTCGTAGGGCCGAACTCTCGTTGCCAGGCCCCGTGC	0	0	0	0	0	0	1	0	3	0.01	2	0	2	0	8
	GGTGTCGTAGGGCCGAACCCACGTTCCCAGGCCCCGTGC	0	0	0	0	0	0	0	0	5	0.03	1	0	0	0	6
GGTGTCGTAGGGGGGCCGAACTCATCGTTCCAGGCCCCGTGC	Total Number of Reads = 336	Number of Unique Sequences = 41
	GGTGTCGTAGGGGGGCCGAACTCATCGTTCCAGGCCCCGTGC	6	0.28	3	0.2	9	0.5	26	0.55	28	0.6	72	0.7	55	0.63	199
	AGTGTTGTAGGGGGGCCGAACTCATCGTTCCAGGCCCCGTGC	12	0.57	8	0.53	4	0.22	8	0.17	2	0.04	0	0	1	0.01	35
	GGTGTCGTAGGGAAACCGAACTCATCGTTCCAGGCCCCGTGC	0	0	1	0.06	0	0	3	0.06	5	0.1	7	0.06	8	0.09	24
	GGTGTCGTAGGGTTTCCGAACTCATCGTTCCAGGCCCCGTGC	0	0	0	0	2	0.11	1	0.02	4	0.08	2	0.01	4	0.04	13
	GGTGTCGTACCCGGGCCGAACTCATCGTTCCAGGCCCCGTGC	0	0	2	0.13	0	0	1	0.02	2	0.04	2	0.01	5	0.05	12
	GGTGTCGTAGGCCGGGGGAACTCATCGTTCCAGGCCCCGTGC	0	0	0	0	0	0	0	0	1	0.02	2	0.01	1	0.01	4
	AGTGTCGTAGGGGGGCCGAACTCATCGTTCCAGGCCCCGTGC	1	0.04	0	0	0	0	0	0	0	0	2	0.01	0	0	3
	GGTGTCGTAAGGGGCCCGAACTCATCGTTCCAGGCCCCGTGC	0	0	0	0	0	0	0	0	0	0	0	0	3	0.03	3
	AGTGTTGTAGGGGGGGCCAACTCATCGTTCCAGGCCCCGTGC	1	0.04	0	0	0	0	1	0.02	0	0	0	0	1	0.01	3
	GGTGTCGTAGGGACCCCGAACTCATCGTTCCAGGCCCCGTGC	0	0	0	0	1	0.05	0	0	0	0	2	0.01	0	0	3
	GGTGTCGTAAGGGGGCCGAACTCATCGTTCCAGGCCCCGTGC	0	0	0	0	0	0	0	0	0	0	2	0.01	1	0.01	3
	GGTGTCGTAGGGGGGCCGAACCCATCGTTCCAGGCCCCGTGC	0	0	0	0	0	0	0	0	0	0	1	0	1	0.01	2
	GGTGTCGTAAGGGGCCGGAACTCATCGTTCCAGGCCCCGTGC	0	0	0	0	0	0	1	0.02	0	0	1	0	0	0	2
	GGTGTTGTAGGGGGGCCGAACTCATCGTTCCAGGCCCCGTGC	0	0	0	0	0	0	2	0.04	0	0	0	0	0	0	2
	GGTGTCGTAGGGAACCCGAACTCATCGTTCCAGGCCCCGTGC	0	0	0	0	0	0	0	0	0	0	1	0	1	0.01	2
GGGTGTCGTAGGGCCCGAACTCATCGTTCCAGGCCCCGTGC	Total Number of Reads = 4136	Number of Unique Sequences = 179
	GGGTGTCGTAGGGCCCGAACTCATCGTTCCAGGCCCCGTGC	36	0.22	19	0.44	67	0.43	209	0.22	304	0.5	526	0.43	515	0.49	1676
	GAGTGTCGTAGGGCCCGAACTCATCGTTCCAGGCCCCGTGC	36	0.22	8	0.18	15	0.09	113	0.12	25	0.04	44	0.03	19	0.01	260
	GTGTGTCGTAGGGCCCGAACTCATCGTTCCAGGCCCCGTGC	6	0.03	0	0	2	0.01	53	0.05	10	0.01	86	0.07	43	0.04	200
	GGTGTGTCGTAGGGCCCGAACTCATCGTTCCAGGCCCCGTGC	7	0.04	0	0	3	0.01	74	0.08	20	0.03	59	0.04	35	0.03	198
	GGGTGTCGTAGGGACCGAACTCATCGTTCCAGGCCCCGTGC	8	0.05	3	0.06	3	0.01	20	0.02	34	0.05	51	0.04	56	0.05	175
	GTGAGTCGTAGGGCCCGAACTCATCGTTCCAGGCCCCGTGC	0	0	0	0	3	0.01	25	0.02	4	0	68	0.05	60	0.05	160
	GATGTGTCGTAGGGGCCGAACTCATCGTTCCAGGCCCCGTGC	5	0.03	0	0	11	0.07	56	0.06	22	0.03	30	0.02	13	0.01	137
	GGGGTGTCGTAGGGGCCGAACTCATCGTTCCAGGCCCCGTGC	0	0	4	0.09	5	0.03	22	0.02	26	0.04	26	0.02	34	0.03	117
	GATGTGTCGTAGGGCCCGAACTCATCGTTCCAGGCCCCGTGC	10	0.06	2	0.04	0	0	43	0.04	5	0	33	0.02	7	0	100
	GGGTGTCGTAGGGTCCGAACTCATCGTTCCAGGCCCCGTGC	3	0.01	0	0	4	0.02	19	0.02	15	0.02	26	0.02	29	0.02	96
	GGTGTGTCGTAGGGCCGAAACTCATCGTTCCAGGCCCCGTGC	6	0.03	2	0.04	3	0.01	43	0.04	9	0.01	16	0.01	15	0.01	94
	GTGATGTCGTAGGGCCCGAACTCATCGTTCCAGGCCCCGTGC	0	0	0	0	0	0	17	0.01	9	0.01	22	0.01	28	0.02	76
	GTGTGTCGTAGGGGCCGAACTCATCGTTCCAGGCCCCGTGC	4	0.02	0	0	4	0.02	24	0.02	10	0.01	13	0.01	12	0.01	67
	GTGATGTCGTAGGGGCCGAACTCATCGTTCCAGGCCCCGTGC	1	0	0	0	0	0	10	0.01	9	0.01	18	0.01	28	0.02	66
	GGTGTGTCGTAGGGGCCGAACTCATCGTTCCAGGCCCCGTGC	1	0	0	0	2	0.01	20	0.02	8	0.01	14	0.01	7	0	52
	GTGAGTCGTAGGGGCCGAACTCATCGTTCCAGGCCCCGTGC	1	0	0	0	0	0	8	0	3	0	17	0.01	13	0.01	42
	GTGTGTCGTAGGGACCGAACTCATCGTTCCAGGCCCCGTGC	0	0	0	0	2	0.01	6	0	14	0.02	3	0	13	0.01	38
	GGATGTCGTAGGGCCCGAACTCATCGTTCCAGGCCCCGTGC	0	0	0	0	1	0	5	0	4	0	13	0.01	11	0.01	34
	GGTGTGTCGTAAGGGCCGAACTCATCGTTCCAGGCCCCGTGC	2	0.01	0	0	1	0	10	0.01	8	0.01	7	0	4	0	32
	GTGAGTCGTAGGGACCGAACTCATCGTTCCAGGCCCCGTGC	0	0	0	0	1	0	3	0	5	0	9	0	7	0	25
	GTGAGTCGTAGGGCCGGAACTCATCGTTCCAGGCCCCGTGC	0	0	0	0	0	0	3	0	4	0	10	0	7	0	24
	GAGTGTCGTAGGGACCGAACTCATCGTTCCAGGCCCCGTGC	2	0.01	1	0.02	2	0.01	13	0.01	2	0	3	0	0	0	23
AGTGTGTTAGGACGGCAACTCATCGTTCCAGGCCCCGTGC	Total Number of Reads = 464	Number of Unique Sequences = 56
	AGTGTGTTAGGACGGCAACTCATCGTTCCAGGCCCCGTGC	117	0.44	12	0.41	23	0.47	37	0.36	4	0.3	1	0.1	1	0.5	195
	AGTGTCGTAGGACGGCAACTCATCGTTCCAGGCCCCGTGC	73	0.27	9	0.31	8	0.16	23	0.22	3	0.23	6	0.6	0	0	122
	AGTGTTGTAGGACGGCAACTCATCGTTCCAGGCCCCGTGC	12	0.04	3	0.1	7	0.14	6	0.05	1	0.07	0	0	0	0	29
	AGTGTTGTAGGCCGGCAACTCATCGTTCCAGGCCCCGTGC	2	0	1	0.03	1	0.02	4	0.03	0	0	1	0.1	0	0	9
	AGTGTATTGGTACGGCAACTCATCGTTCCAGGCCCCGTGC	5	0.01	1	0.03	1	0.02	1	0	0	0	0	0	0	0	8
	TGAGTGTTAGGACGGCAACTCATCGTTCCAGGCCCCGTGC	2	0	0	0	0	0	5	0.04	0	0	0	0	0	0	7
	GATGCGTTAGGACGGCAACTCATCGTTCCAGGCCCCGTGC	3	0.01	0	0	0	0	2	0.01	1	0.07	0	0	0	0	6
	AGTGTGTTGGTACGGCAACTCATCGTTCCAGGCCCCGTGC	4	0.01	0	0	0	0	2	0.01	0	0	0	0	0	0	6
	AGTGTATTAGGACGGCAACTCATCGTTCCAGGCCCCGTGC	4	0.01	0	0	1	0.02	1	0	0	0	0	0	0	0	6
	AGTGTGTTAGGGCCGGAACTCATCGTTCCAGGCCCCGTGC	4	0.01	0	0	2	0.04	0	0	0	0	0	0	0	0	6
	AGTGTAGTAGGACGGCAACTCATCGTTCCAGGCCCCGTGC	4	0.01	1	0.03	0	0	0	0	0	0	0	0	0	0	5
	GATGTGCTAGGACGGCAACTCATCGTTCCAGGCCCCGTGC	0	0	0	0	0	0	3	0.02	1	0.07	0	0	0	0	4
	AGTGTGTACGGACGGCAACTCATCGTTCCAGGCCCCGTGC	2	0	0	0	0	0	1	0	0	0	0	0	0	0	3
	AGAGTCGTAGGACGGCAACTCATCGTTCCAGGCCCCGTGC	1	0	0	0	1	0.02	1	0	0	0	0	0	0	0	3
	AGTGTGTACGGTCGGCAACTCATCGTTCCAGGCCCCGTGC	3	0.01	0	0	0	0	0	0	0	0	0	0	0	0	3
	GAGTGTCGTAGGACGGCAACTCATCGTTCCAGGCCCCGTGC	1	0	0	0	0	0	1	0	1	0.07	0	0	0	0	3
GGTGTCGTAGGCCGAACTCAATCGTTCCAGGCCCCGTGC	Total Number of Reads = 1434	Number of Unique Sequences = 176
	GGTGTCGTAGGCCGAACTCAATCGTTCCAGGCCCCGTGC	0	0	3	0.07	12	0.13	23	0.1	30	0.17	59	0.15	64	0.15	191
	GGTGTCGTAGGCCGAACTCATCCGTTCCAGGCCCCGTGC	1	0	3	0.07	5	0.05	15	0.07	15	0.08	59	0.15	51	0.12	149
	GGTGTCGTAGGGCCAACTCAATCGTTCCAGGCCCCGTGC	4	0.03	1	0.02	6	0.06	6	0.02	15	0.08	38	0.1	30	0.07	100
	GGTGTCGTAGGCCGAACTTCATCGTTCCAGGCCCCGTGC	1	0	1	0.02	3	0.03	7	0.03	5	0.02	17	0.04	40	0.09	74
	GGTGTCGTAGGGCGAACTCAATCGTTCCAGGCCCCGTGC	6	0.04	1	0.02	4	0.04	6	0.02	5	0.02	17	0.04	31	0.07	70
	GGTGTCGTAGGCCGAACTCGATCGTTCCAGGCCCCGTGC	5	0.03	0	0	0	0	10	0.04	10	0.05	14	0.03	27	0.06	66
	AGTGTTGTAGGCCGAACTCATCCGTTCCAGGCCCCGTGC	30	0.23	8	0.2	9	0.1	14	0.06	1	0	3	0	0	0	65
	GGTGTCGTAGGCCGAACTCATTCGTTCCAGGCCCCGTGC	1	0	0	0	2	0.02	6	0.02	6	0.03	24	0.06	25	0.05	64
	AGTGTTGTAGGCCGAACTCAATCGTTCCAGGCCCCGTGC	24	0.19	8	0.2	7	0.07	10	0.04	2	0.01	2	0	1	0	54
	TGAGTTGTAGGCCGAACTCAATCGTTCCAGGCCCCGTGC	3	0.02	1	0.02	1	0.01	14	0.06	5	0.02	6	0.01	14	0.03	44
	GGTGTCGAGGGCCGAACTCAATCGTTCCAGGCCCCGTGC	2	0.01	1	0.02	3	0.03	6	0.02	4	0.02	14	0.03	7	0.01	37
	GGTGTCGTAGGCCGAACTCCATCGTTCCAGGCCCCGTGC	0	0	0	0	1	0.01	5	0.02	8	0.04	12	0.03	10	0.02	36
	GGTGTCGTAGGCCGAACATCATCGTTCCAGGCCCCGTGC	0	0	0	0	0	0	5	0.02	4	0.02	9	0.02	14	0.03	32
	AGTGTTGTAGGCCGAACTCGATCGTTCCAGGCCCCGTGC	11	0.08	3	0.07	7	0.07	8	0.03	0	0	0	0	0	0	29
	GGTGTCGTAGGGCGAACTCGATCGTTCCAGGCCCCGTGC	0	0	0	0	1	0.01	6	0.02	1	0	3	0	12	0.02	23
	AGTGTTGTAGGCCGAACTCATTCGTTCCAGGCCCCGTGC	11	0.08	1	0.02	5	0.05	6	0.02	0	0	0	0	0	0	23
	GTGTCGTAGGCCGAACTCATCCGTTCCAGGCCCCGTGC	0	0	0	0	1	0.01	3	0.01	5	0.02	4	0.01	4	0	17
	GGTGTTGTAGGGCGAACTCAATCGTTCCAGGCCCCGTGC	1	0	0	0	3	0.03	3	0.01	5	0.02	4	0.01	0	0	16
	GGTGTCGTAGGGCCAACTCAATCGTTCCAGGCCCCGTG	1	0	0	0	1	0.01	2	0	1	0	6	0.01	4	0	15
	GTGTCGTAGGCCGAACTCAATCGTTCCAGGCCCCGTGC	0	0	0	0	2	0.02	0	0	2	0.01	6	0.01	4	0	14
	GTGTCGTAGGCCGAACTCGATCGTTCCAGGCCCCGTGC	1	0	0	0	0	0	3	0.01	2	0.01	6	0.01	0	0	12
	GGTGTCGTAGGGCGAACTCATTCGTTCCAGGCCCCGTGC	0	0	0	0	0	0	1	0	0	0	3	0	7	0.01	11
	GGGTGTCGTAGGGCCAACTCAATCGTTCCAGGCCCCGTGC	0	0	0	0	1	0.01	3	0.01	2	0.01	3	0	2	0	11
	GGTGTTGAGGGCCGAACTCAATCGTTCCAGGCCCCGTGC	1	0	0	0	1	0.01	2	0	0	0	3	0	3	0	10
	GTGTCGTAGGCCGAACTCATTCGTTCCAGGCCCCGTGC	0	0	0	0	0	0	1	0	1	0	2	0	4	0	8
TGAGTTGTAGGGCCGAACTCATCGTTCCAGGCCCCGGTGC	Total Number of Reads = 2311	Number of Unique Sequences = 117
	TGAGTTGTAGGGCCGAACTCATCGTTCCAGGCCCCGGTGC	82	0.29	20	0.27	71	0.33	298	0.43	75	0.33	127	0.39	259	0.49	932
	AGTGTTGTAGGGCCGAACCCATCGTTCCAGGCCCCGCTGC	100	0.36	26	0.36	57	0.26	105	0.15	5	0.02	11	0.03	9	0.01	313
	TGAGTTGTAGGGCCGAACTCATCGTTCCAGGCCCCGTTGC	14	0.05	5	0.06	21	0.09	57	0.08	29	0.13	34	0.1	67	0.12	227
	TGAGTTGTAGGGCCGAACCCATCGTTCCAGGCCCCGCTGC	15	0.05	7	0.09	23	0.1	57	0.08	3	0.01	35	0.1	50	0.09	190
	TGAGTTGTAGGGCCGAACCCATCGTTCCAGGCCCCCGTGC	10	0.03	2	0.02	12	0.05	24	0.03	53	0.23	18	0.05	41	0.07	160
	GGAGTTGTAGGGCCGAACTCATCGTTCCAGGCCCCGCTGC	3	0.01	2	0.02	5	0.02	28	0.04	15	0.06	37	0.11	30	0.05	120
	GTGAGTTGTAGGGCCGAACCCATCGTTCCAGGCCCCGCTGC	1	0	1	0.01	0	0	15	0.02	3	0.01	7	0.02	10	0.01	37
	GGGAGTTGTAGGGCCGAACTCATCGTTCCAGGCCCCGCTGC	1	0	1	0.01	0	0	1	0	4	0.01	16	0.04	12	0.02	35
	GAGTGTTGTAGGGCCGAACCCATCGTTCCAGGCCCCGCTGC	7	0.02	5	0.06	2	0	5	0	3	0.01	2	0	1	0	25
	TGAGTTGTAGGGCCGAACTCATCGTTCCAGGCCCCCCTGC	2	0	0	0	2	0	11	0.01	1	0	1	0	1	0	18
	TGAGTTGTAGGGCCGAACCCATCGTTCCAGGCCCCGTCGC	0	0	0	0	0	0	0	0	11	0.04	4	0.01	1	0	16
	ATGAGTTGTAGGGCCGAACTCATCGTTCCAGGCCCCGGTGC	3	0.01	0	0	0	0	8	0.01	1	0	1	0	0	0	13
	TGAGTTGTAGGGCCGAACCCATCGTTCCAGGCCCCGGTGC	0	0	0	0	1	0	5	0	2	0	1	0	4	0	13
	AGTGTTGTAGGGCCGAACCCATCGTTCCAGGCCCCGCTG	7	0.02	0	0	4	0.01	1	0	0	0	0	0	0	0	12
	TGAGTTGTAGGGCCGAACTCATCGTTCCAGGCCCCGTTGCC	2	0	0	0	1	0	2	0	1	0	1	0	5	0	12
AGTGTTGTAAGGGCCGAAACTCATCGTTCCAGGCCCCGTGC	Total Number of Reads = 1430	Number of Unique Sequences = 134
	AGTGTTGTAAGGGCCGAAACTCATCGTTCCAGGCCCCGTGC	277	0.72	68	0.67	64	0.5	133	0.39	30	0.28	13	0.1	4	0.01	589
	TGAGTTGTAAGGGCCGAAACTCATCGTTCCAGGCCCCGTGC	13	0.03	3	0.02	13	0.1	52	0.15	15	0.14	20	0.16	71	0.27	187
	TGAGTTGTAGGGCCCGAAACTCATCGTTCCAGGCCCCGTGC	17	0.04	6	0.05	11	0.08	46	0.13	10	0.09	22	0.18	51	0.19	163
	TGAGTTGTAGGGGCCGAAACTCATCGTTCCAGGCCCCGTGC	4	0.01	4	0.03	2	0.01	23	0.06	7	0.06	9	0.07	23	0.08	72
	TGAGTTGGTAGGGCCGAAACTCATCGTTCCAGGCCCCGTGC	5	0.01	2	0.01	6	0.04	6	0.01	11	0.1	6	0.05	22	0.08	58
	TGAGTTGTAAGGGCCCGAACTCATCGTTCCAGGCCCCGTGC	1	0	0	0	3	0.02	10	0.02	5	0.04	6	0.05	19	0.07	44
	GTGAGTTGTAGGGGCCGAAACTCATCGTTCCAGGCCCCGTGC	2	0	0	0	2	0.01	2	0	7	0.06	3	0.02	5	0.01	21
	TGAGTTGTAGGGCCGGAAACTCATCGTTCCAGGCCCCGTGC	1	0	1	0	0	0	8	0.02	2	0.01	5	0.04	4	0.01	21
	AGTGTTGTAAGGGCCGAAGCTCATCGTTCCAGGCCCCGTGC	11	0.02	2	0.01	3	0.02	2	0	0	0	0	0	0	0	18
	AGAGTTGTAAGGGCCGAAACTCATCGTTCCAGGCCCCGTGC	2	0	0	0	3	0.02	4	0.01	2	0.01	1	0	1	0	13
	AGAGTTGTAGGGCCCGAAACTCATCGTTCCAGGCCCCGTGC	5	0.01	2	0.01	0	0	1	0	0	0	3	0.02	1	0	12
	TGAGTTGTTAGGGCCGGAACTCATCGTTCCAGGCCCCGTGC	2	0	0	0	2	0.01	1	0	1	0	1	0	2	0	9
	TGAGTTGGTAGGGCCGAAGCTCATCGTTCCAGGCCCCGTGC	0	0	0	0	0	0	1	0	0	0	2	0.01	6	0.02	9
	TGAGTTGTAAGGGCCGAAGCTCATCGTTCCAGGCCCCGTGC	0	0	0	0	2	0.01	3	0	0	0	2	0.01	2	0	9
	GTGAGTTGTAAGGGCCCGAACTCATCGTTCCAGGCCCCGTGC	0	0	0	0	0	0	1	0	0	0	3	0.02	4	0.01	8
GGTGTCGTAGGGCCGAACTCATCGTTTTTCCAGGCCCCGTGC	Total Number of Reads = 435	Number of Unique Sequences = 59
	GGTGTCGTAGGGCCGAACTCATCGTTTTTCCAGGCCCCGTGC	2	0.09	0	0	10	0.35	24	0.36	31	0.51	66	0.49	54	0.45	187
	GGTGTCGTAGGGCCGAACTCATCGTTGTTCCAGGCCCCGTGC	0	0	1	0.11	5	0.17	6	0.09	8	0.13	19	0.14	17	0.14	56
	TGAGTTGTAGGGCCGAACTCATCGTTTTTCCAGGCCCCGTGC	1	0.04	1	0.11	3	0.1	8	0.12	3	0.05	7	0.05	6	0.05	29
	AGTGTTGTAGGGCCGAACTCATCGTTTTTCCAGGCCCCGTGC	12	0.57	6	0.66	2	0.07	6	0.09	2	0.03	1	0	0	0	29
	GGTGTCGTAGGGCCGAACTCATCGTTGGGCCAGGCCCCGTGC	1	0.04	0	0	2	0.07	7	0.1	3	0.05	8	0.06	5	0.04	26
	GGTGTCGTAGGGCCGAACTCATCGAAATTCCAGGCCCCGTGC	1	0.04	0	0	0	0	2	0.03	3	0.05	5	0.03	8	0.06	19
	GGTGTCGTAGGGCCGAACTCATCGTTAAACCAGGCCCCGTGC	0	0	0	0	0	0	2	0.03	1	0.01	3	0.02	4	0.03	10
	GGTGTCGTAGGGCCGAACTCATCGATTGCCCAGGCCCCGTGC	0	0	1	0.11	2	0.07	2	0.03	1	0.01	2	0.01	1	0	9
	GGTGTCGTAGGGCCGAACTCATCCGGTTTCCAGGCCCCGTGC	1	0.04	0	0	0	0	0	0	0	0	0	0	2	0.01	3
	GGTGTCGTAGGGCCGAACTCATCGTTTGCCCAGGCCCCGTGC	0	0	0	0	0	0	0	0	1	0.01	0	0	2	0.01	3
	AGAGTTGTAGGGCCGAACTCATCGTTTTTCCAGGCCCCGTGC	1	0.04	0	0	1	0.03	0	0	0	0	0	0	1	0	3
	GGTGTCGTAGGGCCGAACTCATCGGTTTCCCAGGCCCCGTGC	0	0	0	0	0	0	0	0	1	0.01	2	0.01	0	0	3
	GGTGTCGTAGGGCCGAACTCATCGTTTTCCCAGGCCCCGTGC	0	0	0	0	0	0	0	0	0	0	1	0	2	0.01	3
GTGATGTGTAGGGCCGAACTCATCGTTCCCAGGCCCCGTGC	Total Number of Reads = 2364	Number of Unique Sequences = 77
	GTGATGTGTAGGGCCGAACTCATCGTTCCCAGGCCCCGTGC	6	0.12	2	0.25	23	0.57	262	0.62	156	0.63	443	0.69	725	0.75	1617
	GTGATGTGTAGGGCCGAACTCATCGGTTCCAGGCCCCGTGC	1	0.02	1	0.12	2	0.05	26	0.06	18	0.07	51	0.07	83	0.08	182
	GTGATGTGTAGGGCCGAACTCATTCGTTCCAGGCCCCGTGC	9	0.18	0	0	3	0.07	31	0.07	9	0.03	39	0.06	24	0.02	115
	GTGATGTGTAGGGCCGAACTCATCCGTTCCAGGCCCCGTGC	0	0	0	0	1	0.02	15	0.03	9	0.03	24	0.03	37	0.03	86
	ATGAGTTGTAGGGCCGAACTCATCGGTTCCAGGCCCCGTGC	15	0.31	2	0.25	2	0.05	22	0.05	16	0.06	4	0	8	0	69
	GTGATGTGTAGGGCCGAACTCATCGTTTCCAGGCCCCGTGC	2	0.04	0	0	1	0.02	7	0.01	11	0.04	25	0.03	21	0.02	67
	GGTGATGTGTAGGGCCGAACTCATCGTTCCCAGGCCCCGTGC	0	0	0	0	0	0	2	0	0	0	7	0.01	10	0.01	19
	GATGTGTGTAGGGCCGAACTCATCGGTTCCAGGCCCCGTGC	3	0.06	0	0	1	0.02	9	0.02	2	0	3	0	1	0	19
	TGATGTGTAGGGCCGAACTCATCGGTTCCAGGCCCCGTGC	1	0.02	2	0.25	1	0.02	6	0.01	2	0	2	0	3	0	17
	GTGATGTGTAGGGCCGAACTCATCGTTACCAGGCCCCGTGC	1	0.02	0	0	0	0	1	0	2	0	5	0	7	0	16
	GAGATGTGTAGGGCCGAACTCATCGTTCCCAGGCCCCGTGC	0	0	0	0	0	0	2	0	3	0.01	5	0	3	0	13
AGTGTCTGGACGGCAACTCATCGTTCCAGGCCCCGTGC	Total Number of Reads = 676	Number of Unique Sequences = 45
	AGTGTCTGGACGGCAACTCATCGTTCCAGGCCCCGTGC	199	0.78	31	0.83	41	0.68	117	0.43	2	0.13	1	0.03	2	0.22	393
	GATGTCTGGACGGCAACTCATCGTTCCAGGCCCCGTGC	23	0.09	4	0.1	15	0.25	98	0.36	11	0.73	22	0.7	5	0.55	178
	AGATGTGTGGACGGCAACTCATCGTTCCAGGCCCCGTGC	10	0.03	0	0	0	0	8	0.02	0	0	0	0	0	0	18
	AGATGTGTGGTCGGCAACTCATCGTTCCAGGCCCCGTGC	3	0.01	0	0	1	0.01	9	0.03	0	0	0	0	0	0	13
	GATGTCTGGTCGGCAACTCATCGTTCCAGGCCCCGTGC	2	0	0	0	1	0.01	5	0.01	0	0	2	0.06	1	0.11	11
	AGATGTCTGGACGGCAACTCATCGTTCCAGGCCCCGTGC	2	0	0	0	0	0	2	0	0	0	1	0.03	0	0	5
	ATGATGTGTGGACGGCAACTCATCGTTCCAGGCCCCGTGC	2	0	0	0	0	0	2	0	0	0	1	0.03	0	0	5
	GATGTATGGACGGCAACTCATCGTTCCAGGCCCCGTGC	1	0	1	0.02	0	0	3	0.01	0	0	0	0	0	0	5
	GGTGTCTGGACGGCAACTCATCGTTCCAGGCCCCGTGC	0	0	0	0	0	0	2	0	0	0	2	0.06	0	0	4
GAGTGTGTAGGGCCGAACTCATCGTTCCAGGCCCCGTGCC	Total Number of Reads = 5003	Number of Unique Sequences = 230
	GAGTGTGTAGGGCCGAACTCATCGTTCCAGGCCCCGTGCC	63	0.06	17	0.13	47	0.18	347	0.16	63	0.13	85	0.11	39	0.08	661
	GTGTGTGTAGGGCCGAACTCATCGTTCCAGGCCCCGTCG	13	0.01	2	0.01	16	0.06	170	0.08	56	0.11	105	0.14	109	0.23	471
	GAGTGTGTAGGGCCGAACTCATCGTTCCAGGCCCCGTGTC	91	0.09	3	0.02	11	0.04	199	0.09	31	0.06	54	0.07	8	0.01	397
	GAGTGTGTAGGGCCGAACTCATCGTTCCAGGCCCCGTCG	62	0.06	5	0.03	25	0.1	190	0.09	32	0.06	62	0.08	16	0.03	392
	GAGTGTGTAGGGCCGAACTCATCGTTCCAGGCCCCGTCCG	96	0.1	5	0.03	10	0.04	141	0.06	36	0.07	49	0.06	23	0.04	360
	GTGAGTGTAGGGCCGAACTCATCGTTCCAGGCCCCGTCGC	4	0	2	0.01	2	0	54	0.02	36	0.07	99	0.13	111	0.23	308
	GAGTGTGTAGGGCCGAACTCATCGTTCCAGGCCCCGTA	38	0.04	6	0.04	17	0.06	121	0.05	27	0.05	35	0.04	11	0.02	255
	GAGTGTGTAGGGCCGAACTCATCGTTCCAGGCCCCGGTGC	80	0.08	8	0.06	10	0.04	67	0.03	10	0.02	18	0.02	6	0.01	199
	GAGTGTGTAGGGCCGAACTCATCGTTCCAGGCCCCGTCGC	35	0.03	6	0.04	11	0.04	67	0.03	19	0.04	28	0.03	11	0.02	177
	AGTGTGTAGGGCCGAACTCATCGTTCCAGGCCCCGTAGC	64	0.07	22	0.17	18	0.07	54	0.02	3	0	2	0	1	0	164
	AGTGTGTAGGGCCGAACTCATCGTTCCAGGCCCCGTGGC	54	0.05	19	0.14	18	0.07	56	0.02	6	0.01	3	0	3	0	159
	GTGTGTGTAGGGCCGAACTCATCGTTCCAGGCCCCGTCGC	6	0	0	0	2	0	38	0.01	11	0.02	30	0.04	34	0.07	121
	AGTGTGTAGGGCCGAACTCATCGTTCCAGGCCCCGTCGC	26	0.02	13	0.1	12	0.04	39	0.01	4	0	10	0.01	2	0	106
	AGTGTGTAGGGCCGAACTCATCGTTCCAGGCCCCGTCG	31	0.03	3	0.02	7	0.02	43	0.02	9	0.01	5	0	3	0	101
	GAGTGTGTAGGGCCGAACTCATCGTTCCAGGCCCCGTGGC	6	0	1	0	2	0	49	0.02	5	0.01	8	0.01	2	0	73
	GAGTGTGTAGGGCCGAACTCATCGTTCCAGGCCCCGTAGC	5	0	1	0	3	0.01	38	0.01	6	0.01	11	0.01	4	0	68
	GAGTGTGTAGGGCCGAACTCATCGTTCCAGGCCCCGTACCG	9	0	2	0.01	6	0.02	28	0.01	10	0.02	4	0	3	0	62
	GAGTGTGTAGGGCCGAACTCATCGTTCCAGGCCCCGCCG	35	0.03	1	0	1	0	17	0	2	0	3	0	0	0	59
	GAGTGTGTAGGGCCGAACTCATCGTTCCAGGCCCCGGCG	7	0	0	0	3	0.01	32	0.01	4	0	9	0.01	0	0	55
	GAGTGTGTAGGGCCGAACTCATCGTTCCAGGCCCCGTC	6	0	0	0	1	0	21	0.01	8	0.01	4	0	1	0	41
	GTGTGTGTAGGGCCGAACTCATCGTTCCAGGCCCCGTAGC	0	0	0	0	0	0	10	0	4	0	9	0.01	10	0.02	33
	AGTGTGTAGGGCCGAACTCATCGTTCCAGGCCCCGTCC	13	0.01	2	0.01	1	0	9	0	2	0	1	0	0	0	28
	GAGTGTGTAGGGCCGAACTCATCGTTCCAGGCCCCGTCC	5	0	0	0	1	0	14	0	6	0.01	0	0	1	0	27
	GTGTGTGTAGGGCCGAACTCATCGTTCCAGGCCCCGTGGC	3	0	0	0	0	0	9	0	2	0	9	0.01	3	0	26
GGTGTCGGTAGGGCCGAACTCATCGTCCAGGCCCCGTGC	Total Number of Reads = 1046	Number of Unique Sequences = 149
	GGTGTCGGTAGGGCCGAACTCATCGTCCAGGCCCCGTGC	4	0.08	2	0.08	1	0.02	16	0.09	33	0.21	74	0.22	46	0.16	176
	GGTGTCGTAAGGGCCGAACTCATCGTCCAGGCCCCGTGC	0	0	4	0.16	9	0.18	17	0.1	16	0.1	49	0.14	31	0.11	126
	GGTGTCGTAGGGACCGAACTCATCGTCCAGGCCCCGTGC	1	0.02	2	0.08	1	0.02	10	0.06	11	0.07	25	0.07	25	0.09	75
	GATGTGTGTAGGGCCGAACTCATCGTCCAGGCCCCGTGC	3	0.06	0	0	5	0.1	18	0.11	4	0.02	13	0.03	5	0.01	48
	GGTGTCGTAGGGGCCGAACTCATCGTCCAGGCCCCGTGC	2	0.04	1	0.04	2	0.04	8	0.04	5	0.03	17	0.05	8	0.02	43
	GGTGTCGGTAGGGCCGAACTCATCTTCCAGGCCCCGTGC	0	0	0	0	0	0	2	0.01	8	0.05	15	0.04	15	0.05	40
	GGTGTCCGTAGGGCCGAACTCATCGTCCAGGCCCCGTGC	1	0.02	1	0.04	2	0.04	2	0.01	5	0.03	15	0.04	13	0.04	39
	GGTGTGCGTAGGGCCGAACTCATCGTCCAGGCCCCGTGC	0	0	0	0	0	0	17	0.1	1	0	7	0.02	9	0.03	34
	GGTGTCGCTAGGGCCGAACTCATCGTCCAGGCCCCGTGC	1	0.02	0	0	0	0	7	0.04	5	0.03	5	0.01	10	0.03	28
	GGTGTCGTTAGGGCCGAACTCATCGTCCAGGCCCCGTGC	2	0.04	3	0.12	1	0.02	4	0.02	4	0.02	5	0.01	8	0.02	27
	AGTGTTCGTAGGGCCGAACTCATCGTCCAGGCCCCGTGC	9	0.18	2	0.08	7	0.14	7	0.04	1	0	0	0	0	0	26
	GGTGTCAGTAGGGCCGAACTCATCTTCCAGGCCCCGTGC	0	0	0	0	2	0.04	1	0	3	0.01	9	0.02	9	0.03	24
	AGTGTTGGTAGGGCCGAACTCATCGTCCAGGCCCCGTGC	6	0.12	5	0.2	2	0.04	3	0.01	2	0.01	1	0	0	0	19
	GGTGTACGTAGGGCCGAACTCATCGTCCAGGCCCCGTGC	0	0	0	0	2	0.04	1	0	5	0.03	6	0.01	4	0.01	18
	GGTGTCGGTAGGGCCGAACTCATCGTTCAGGCCCCGTGC	0	0	0	0	0	0	2	0.01	4	0.02	9	0.02	2	0	17
	GGTGTCGGTAGGGCCGAACTCATCGTCCAGGCCCCGTG	0	0	0	0	1	0.02	0	0	4	0.02	6	0.01	2	0	13
	GGTGTCGTAGGGTCCGAACTCATCGTCCAGGCCCCGTGC	0	0	0	0	0	0	2	0.01	3	0.01	3	0	4	0.01	12
	GGTGTCGGTAGGGCCGAACTCATCGTTCCGGCCCCGTGC	0	0	0	0	1	0.02	2	0.01	3	0.01	2	0	4	0.01	12
	TGAGTTGCTAGGGCCGAACTCATCGTCCAGGCCCCGTGC	0	0	0	0	2	0.04	5	0.03	0	0	0	0	4	0.01	11
	GATGTGCGTAGGGCCGAACTCATCGTCCAGGCCCCGTGC	0	0	0	0	2	0.04	3	0.01	2	0.01	2	0	1	0	10
	AGTGTTAGTAGGGCCGAACTCATCGTCCAGGCCCCGTGC	4	0.08	1	0.04	2	0.04	1	0	0	0	0	0	1	0	9
	GGTGTCCGTAGGGCCGAACTCATCTTCCAGGCCCCGTGC	0	0	0	0	1	0.02	1	0	1	0	1	0	5	0.01	9
	GGGTGTCGTAAGGGCCGAACTCATCGTCCAGGCCCCGTGC	1	0.02	0	0	0	0	2	0.01	1	0	2	0	2	0	8
	GGTGTCCGTAGGGCCGAACTCATCGTTCAGGCCCCGTGC	0	0	0	0	0	0	1	0	3	0.01	2	0	2	0	8
	GTGTCGGTAGGGCCGAACTCATCGTCCAGGCCCCGTGC	0	0	0	0	0	0	0	0	1	0	3	0	3	0.01	7
	AGTGTTTGTAGGGCCGAACTCATCGTCCAGGCCCCGTGC	4	0.08	0	0	0	0	0	0	2	0.01	1	0	0	0	7
	GGGTGTCGGTAGGGCCGAACTCATCGTCCAGGCCCCGTGC	0	0	0	0	0	0	0	0	0	0	6	0.01	0	0	6
	GGGTGTCCGTAGGGCCGAACTCATCGTCCAGGCCCCGTGC	0	0	0	0	0	0	0	0	0	0	5	0.01	1	0	6
	GGGTGTCCGTAGGGCCGAACTCATCTTCCAGGCCCCGTGC	0	0	0	0	0	0	0	0	1	0	3	0	2	0	6
GGTGTCGTAGGGCCGAACTCATCGTCCAGGCCCCCGTGC	Total Number of Reads = 1670	Number of Unique Sequences = 219
	GGTGTCGTAGGGCCGAACTCATCGTCCAGGCCCCCGTGC	1	0	3	0.08	13	0.16	47	0.16	36	0.16	78	0.17	89	0.17	267
	GGTGTCGTAGGGCCGAACTCATCTTCCAGGCCCCCGTGC	4	0.03	1	0.02	7	0.09	14	0.04	40	0.18	45	0.1	64	0.12	175
	GGTGTCGTAGGGCCGAACTCATCGTCCAGGCCCCAGTGC	1	0	2	0.05	3	0.03	20	0.06	13	0.05	35	0.07	29	0.05	103
	GGTGTCGTAGGGCCGAACTCATCGTCCAGGCCCCTGTGC	1	0	4	0.11	4	0.05	15	0.05	9	0.04	37	0.08	28	0.05	98
	GGTGTCGTAGGGCCGAACTCATCGTCCAGGCCCCGGTGC	2	0.01	2	0.05	3	0.03	10	0.03	10	0.04	37	0.08	26	0.05	90
	AGTGTTGTAGGGCCGAACTCATCTTCCAGGCCCCCGTGC	27	0.26	5	0.14	10	0.12	18	0.06	1	0	1	0	0	0	62
	GGTGTCGTAGGGCCGAACTCACGTTCCAGGCCCCCGTGC	0	0	0	0	3	0.03	10	0.03	10	0.04	14	0.03	23	0.04	60
	GGTGTCGTAGGGCCGAACTCATCTTCCAGGCCCCGGTGC	1	0	0	0	1	0.01	2	0	9	0.04	19	0.04	21	0.04	53
	GGGTGTCGTAGGGCCGAACTCATCTTCCAGGCCCCCGTGC	2	0.01	0	0	1	0.01	9	0.03	9	0.04	10	0.02	15	0.02	46
	GGTGTCGTAGGGCCGAACTCATCGTTCAGGCCCCCGTGC	4	0.03	0	0	0	0	11	0.03	6	0.02	11	0.02	12	0.02	44
	TGAGTTGTAGGGCCGAACTCATCTTCCAGGCCCCCGTGC	3	0.02	1	0.02	4	0.05	17	0.05	2	0	5	0.01	11	0.02	43
	GGTGTCGTAGGGCCGAACTCATCGTCCAGGGCCCCGTGC	1	0	1	0.02	1	0.01	7	0.02	4	0.01	15	0.03	10	0.01	39
	GGGTGTCGTAGGGCCGAACTCATCGTCCAGGCCCCCGTGC	1	0	1	0.02	4	0.05	4	0.01	7	0.03	6	0.01	11	0.02	34
	GGTGTCGTAGGGCCGAACTCATCTTCCAAGGCCCCGTGC	0	0	0	0	0	0	3	0.01	4	0.01	6	0.01	16	0.03	29
	AGTGTTGTAGGGCCGAACTCATCGTCCAGGCCCCCGTGC	16	0.15	0	0	4	0.05	7	0.02	1	0	0	0	0	0	28
	GGTGTCGTAGGGCCGAACTCACGTTCCAGGCCCCTGTGC	0	0	0	0	1	0.01	5	0.01	6	0.02	3	0	8	0.01	23
	GGTGTCGTAGGGCCGAACTCATCTTCCAGGGCCCCGTGC	2	0.01	0	0	0	0	1	0	3	0.01	6	0.01	8	0.01	20
	GGTGTCGTAGGGCCGAACTCATGTTCCAGGCCCCCGTGC	0	0	0	0	2	0.02	2	0	2	0	7	0.01	5	0	18
	GGTGTCGTAGGGCCGAACTCACGTTCCAGGCCCCAGTGC	0	0	0	0	1	0.01	2	0	1	0	3	0	7	0.01	14
	GGGTGTCGTAGGGCCGAACTCATCGTTCAGGCCCCCGTGC	0	0	0	0	1	0.01	1	0	2	0	2	0	5	0	11
	GTGTCGTAGGGCCGAACTCATCGTCCAGGCCCCAGTGC	0	0	0	0	0	0	1	0	1	0	5	0.01	4	0	11
	GGTGTCGTAGGGCCGAACTCACGTTCCAGGGCCCCGTGC	0	0	0	0	0	0	1	0	3	0.01	4	0	2	0	10
	AGTGTTGTAGGGCCGAACTCATCGTCCAGGCCCCAGTGC	6	0.05	1	0.02	0	0	0	0	2	0	1	0	0	0	10
	GTGTCGTAGGGCCGAACTCATCGTCCAGGCCCCCGTGC	0	0	0	0	1	0.01	2	0	2	0	2	0	3	0	10
	GGTGTCGTAGGGCCGAACTCATGTTCCAGGCCCCTGTGC	0	0	0	0	0	0	3	0.01	1	0	1	0	4	0	9
	GGGTGTCGTAGGGCCGAACTCACGTTCCAGGCCCCCGTGC	1	0	0	0	0	0	3	0.01	0	0	0	0	5	0	9
	GGTGTCGTAGGGCCGAACTCATCGTCCAGGCCCTCGTGC	0	0	0	0	0	0	1	0	1	0	3	0	4	0	9
TGAGTTGTAGGGCCGAACTCATCGTTCCAGGCCCCGTGT	Total Number of Reads = 37115	Number of Unique Sequences = 158
	TGAGTTGTAGGGCCGAACTCATCGTTCCAGGCCCCGTGT	4722	0.53	412	0.32	923	0.39	6946	0.54	2461	0.59	2045	0.55	1803	0.43	19312
	TGAGTTGTAGGGCCGAACTCATCGTTCCAGGCCCCATGC	1249	0.14	379	0.29	887	0.38	3682	0.29	1017	0.24	1119	0.3	1833	0.44	10166
	TGAGCTGTAGGGCCGAACTCATCGTTCCAGGCCCCGTGC	879	0.09	265	0.2	287	0.12	1224	0.09	446	0.1	391	0.1	406	0.09	3898
	AGTGTTGTAGGGCCGAACTCATCGTTCCAGGCCCCATGT	798	0.08	86	0.06	43	0.01	39	0	0	0	5	0	0	0	971
	AGAGTTGTAGGGCCGAACTCATCGTTCCAGGCCCCGTGT	331	0.03	24	0.01	54	0.02	290	0.02	71	0.01	30	0	18	0	818
	AGAGTTGTAGGGCCGAACTCATCGTTCCAGGCCCCATGC	183	0.02	38	0.02	62	0.02	173	0.01	35	0	31	0	21	0	543
GGTGTCGTAGGGCCGAAAACTCATCGTTCCAGGCCCCGTGC	Total Number of Reads = 2110	Number of Unique Sequences = 134
	GGTGTCGTAGGGCCGAAAACTCATCGTTCCAGGCCCCGTGC	8	0.13	6	0.28	14	0.17	83	0.24	60	0.21	165	0.23	160	0.24	496
	GGTGTCGTAGGGCCCCGAACTCATCGTTCCAGGCCCCGTGC	7	0.11	0	0	12	0.15	51	0.15	46	0.16	120	0.17	115	0.17	351
	GGTGTCGTAGGGCCGGGAACTCATCGTTCCAGGCCCCGTGC	2	0.03	4	0.19	11	0.13	45	0.13	50	0.17	103	0.14	87	0.13	302
	GGTGTCGTAGGGCCGGAAACTCATCGTTCCAGGCCCCGTGC	5	0.08	0	0	3	0.03	27	0.08	28	0.1	61	0.08	63	0.09	187
	GGTGTCGTAGGGCCGTGAACTCATCGTTCCAGGCCCCGTGC	2	0.03	3	0.14	6	0.07	19	0.05	20	0.07	66	0.09	54	0.08	170
	GGTGTCGTAGGGCCGTTAACTCATCGTTCCAGGCCCCGTGC	1	0.01	2	0.09	3	0.03	16	0.04	11	0.03	34	0.04	26	0.04	93
	GGTGTCGTAGGGCCGCCAACTCATCGTTCCAGGCCCCGTGC	3	0.05	0	0	5	0.06	11	0.03	6	0.02	30	0.04	22	0.03	77
	GGTGTCGTAGGGCCGCGAACTCATCGTTCCAGGCCCCGTGC	0	0	0	0	2	0.02	9	0.02	2	0	15	0.02	15	0.02	43
	GGTGTCGTAGGGCCGCTAACTCATCGTTCCAGGCCCCGTGC	0	0	0	0	1	0.01	10	0.03	3	0.01	13	0.01	16	0.02	43
	GGTGTCGTAGGGCCGTAAACTCATCGTTCCAGGCCCCGTGC	1	0.01	1	0.04	0	0	6	0.01	3	0.01	16	0.02	10	0.01	37
	GGTGTCGTAGGGCCCGGAACTCATCGTTCCAGGCCCCGTGC	0	0	0	0	3	0.03	5	0.01	5	0.01	12	0.01	7	0.01	32
	GGGTGTCGTAGGGCCGTGAACTCATCGTTCCAGGCCCCGTGC	0	0	1	0.04	1	0.01	4	0.01	7	0.02	3	0	12	0.01	28
	GGTGTCGTAGGGCCGGCAACTCATCGTTCCAGGCCCCGTGC	1	0.01	1	0.04	1	0.01	4	0.01	2	0	5	0	8	0.01	22
	AGTGTTGTAGGGCCGTGAACTCATCGTTCCAGGCCCCGTGC	9	0.15	1	0.04	4	0.05	3	0	3	0.01	1	0	0	0	21
GGTGTCGTAGGGCCGAAACTATCGTTCCAGGCCCCGTGC	Total Number of Reads = 1076	Number of Unique Sequences = 152
	GGTGTCGTAGGGCCGAAACTATCGTTCCAGGCCCCGTGC	7	0.14	1	0.07	9	0.26	33	0.28	42	0.23	72	0.22	84	0.23	248
	GGTGTCGTAGGGCCGAAACTCACGTTCCAGGCCCCGTGC	6	0.12	2	0.14	2	0.05	20	0.17	35	0.19	52	0.16	49	0.13	166
	GGTGTCGTAGGGCCGAAACTCTCGTTCCAGGCCCCGTGC	2	0.04	2	0.14	5	0.14	11	0.09	21	0.11	46	0.14	78	0.21	165
	GGTGTCGTAGGGCCGAAACTCATCTTCCAGGCCCCGTGC	2	0.04	1	0.07	3	0.08	4	0.03	16	0.09	21	0.06	31	0.08	78
	GGTGTCGTAGGGCCGAAACTCATGTTCCAGGCCCCGTGC	1	0.02	0	0	0	0	7	0.05	7	0.03	11	0.03	16	0.04	42
	GGGTGTCGTAGGGCCGAAACTCTCGTTCCAGGCCCCGTGC	0	0	2	0.14	0	0	2	0.01	1	0	6	0.01	13	0.03	24
	GGTGTCGTAGGGCCGAAGCTCACGTTCCAGGCCCCGTGC	1	0.02	0	0	1	0.02	2	0.01	7	0.03	9	0.02	2	0	22
	GGGTGTCGTAGGGCCGAAACTCACGTTCCAGGCCCCGTGC	2	0.04	0	0	0	0	3	0.02	3	0.01	4	0.01	5	0.01	17
	AGTGTTGTAGGGCCGAAACTCACGTTCCAGGCCCCGTGC	10	0.2	2	0.14	0	0	2	0.01	1	0	1	0	0	0	16
	GGTGTCGTAGGGCCGAAGCTCATCTTCCAGGCCCCGTGC	0	0	0	0	1	0.02	1	0	4	0.02	5	0.01	4	0.01	15
	GGTGTCGTAGGGCCGAACTTCACGTTCCAGGCCCCGTGC	0	0	0	0	1	0.02	2	0.01	2	0.01	2	0	7	0.01	14
	GGTGTTGTAGGGCCGAATCACTCGTTCCAGGCCCCGTGC	2	0.04	0	0	4	0.11	2	0.01	5	0.02	1	0	0	0	14
	GGGTGTCGTAGGGCCGAAACTATCGTTCCAGGCCCCGTGC	0	0	0	0	0	0	2	0.01	0	0	6	0.01	4	0.01	12
	GGTGTCGTAGGGCCGGAACTCACGTTCCAGGCCCCGTGC	2	0.04	0	0	1	0.02	2	0.01	1	0	3	0	2	0	11
	GGGTGTCGTAGGGCCGAAACTCATCTTCCAGGCCCCGTGC	0	0	0	0	1	0.02	0	0	3	0.01	2	0	3	0	9
	GGTGTCGTAGGGCCGAAGCTCTCGTTCCAGGCCCCGTGC	0	0	0	0	2	0.05	0	0	0	0	5	0.01	2	0	9
	GGTGTCGTAGGGCCCGAACTCACGTTCCAGGCCCCGTGC	0	0	0	0	0	0	1	0	1	0	2	0	4	0.01	8
	GGTGTCGTAGGGCCGAACTTCATCTTCCAGGCCCCGTGC	0	0	0	0	0	0	2	0.01	0	0	3	0	2	0	7
	GGTGTCGTAGGGCCGAACATCACGTTCCAGGCCCCGTGC	0	0	0	0	0	0	1	0	1	0	3	0	2	0	7
GGTGTCGTAGGGCCGAACTCATCCGTTCCCAGGCCCCGTGC	Total Number of Reads = 1920	Number of Unique Sequences = 221
	GGTGTCGTAGGGCCGAACTCATCCGTTCCCAGGCCCCGTGC	4	0.03	3	0.06	12	0.12	29	0.11	30	0.11	103	0.19	84	0.13	265
	GGTGTCGTAGGGCCGAACTCATTCGTTCCCAGGCCCCGTGC	3	0.02	1	0.02	6	0.06	40	0.15	19	0.07	81	0.15	88	0.14	238
	GGTGTCGTAGGGCCGAACTCAATCGTTCCCAGGCCCCGTGC	4	0.03	4	0.09	2	0.02	11	0.04	33	0.12	46	0.08	64	0.1	164
	GGTGTCGTAGGGCCGAACTTCATCGTTCCCAGGCCCCGTGC	0	0	1	0.02	6	0.06	7	0.02	5	0.01	30	0.05	39	0.06	88
	AGTGTTGTAGGGCCGAACTCATTCGTTCCCAGGCCCCGTGC	24	0.2	8	0.18	12	0.12	29	0.11	0	0	2	0	1	0	76
	AGTGTTGTAGGGCCGAACTCAATCGTTCCCAGGCCCCGTGC	20	0.16	4	0.09	13	0.13	9	0.03	8	0.03	1	0	4	0	59
	GGTGTCGTAGGGCCGAACTCAATCGGTTCCAGGCCCCGTGC	1	0	0	0	1	0.01	7	0.02	7	0.02	15	0.02	25	0.04	56
	GGTGTCGTAGGGCCGAACTCAATCGTTGCCAGGCCCCGTGC	2	0.01	0	0	2	0.02	6	0.02	10	0.03	15	0.02	17	0.02	52
	GGTGTCGTAGGGCCGAACTCGATCGTTCCAAGGCCCCGTGC	0	0	1	0.02	2	0.02	6	0.02	7	0.02	16	0.03	19	0.03	51
	GGTGTCGTAGGGCCGAACTCATCCGTTCCAAGGCCCCGTGC	0	0	0	0	2	0.02	5	0.01	6	0.02	14	0.02	23	0.03	50
	GGTGTCGTAGGGCCGAACTCAATCGTTCCAGGGCCCCGTGC	2	0.01	1	0.02	3	0.03	3	0.01	7	0.02	10	0.01	17	0.02	43
	GGGTGTCGTAGGGCCGAACTCATCCGTTCCCAGGCCCCGTGC	1	0	1	0.02	2	0.02	5	0.01	10	0.03	15	0.02	9	0.01	43
	TGAGTTGTAGGGCCGAACTCAATCGTTCCCAGGCCCCGTGC	3	0.02	0	0	7	0.07	8	0.03	5	0.01	4	0	7	0.01	34
	GGTGTCGTAGGGCCGAACTCAATCGTTCCAAGGCCCCGTGC	0	0	1	0.02	1	0.01	1	0	4	0.01	11	0.02	16	0.02	34
	GGGTGTCGTAGGGCCGAACTCATTCGTTCCCAGGCCCCGTGC	0	0	1	0.02	3	0.03	6	0.02	4	0.01	8	0.01	11	0.01	33
	GGTGTCGTAGGGCCGAACCCCATCGTTCCCAGGCCCCGTGC	1	0	0	0	0	0	0	0	28	0.1	2	0	0	0	31
	GGTGTCGTAGGGCCGAACTCGATCGTTCCCAGGCCCCGTGC	0	0	0	0	2	0.02	3	0.01	3	0.01	9	0.01	9	0.01	26
	GGTGTCGTAGGGCCGAACTCAATCGTTTCCAGGCCCCGTGC	1	0	0	0	2	0.02	0	0	4	0.01	5	0	12	0.01	24
	GGTGTCGTAGGGCCGAACATCATCGTTCCCAGGCCCCGTGC	0	0	0	0	0	0	2	0	1	0	9	0.01	9	0.01	21
	GGTGTCGTAGGGCCGAACTTCATCGTTGCCAGGCCCCGTGC	0	0	0	0	1	0.01	4	0.01	2	0	8	0.01	5	0	20
	GGTGTCGTAGGGCCGAACTCATTCGTTCCAAGGCCCCGTGC	2	0.01	0	0	0	0	0	0	2	0	7	0.01	6	0	17
	GGGTGTCGTAGGGCCGAACTCAATCGTTCCCAGGCCCCGTGC	0	0	0	0	2	0.02	0	0	3	0.01	4	0	8	0.01	17
	GGTGTCGTAGGGCCGAACTCGATCGTTGCCAGGCCCCGTGC	0	0	0	0	0	0	3	0.01	1	0	8	0.01	5	0	17
	GGTGTCGTAGGGCCGAACTCATTCGGTTCCAGGCCCCGTGC	1	0	0	0	1	0.01	1	0	0	0	4	0	9	0.01	16
	GGTGTCGTAGGGCCGAACTCGATCGATTCCAGGCCCCGTGC	1	0	0	0	0	0	3	0.01	4	0.01	3	0	5	0	16
	GGTGTCGTAGGGCCGAACTTCATCGTTCCAAGGCCCCGTGC	0	0	1	0.02	0	0	2	0	1	0	4	0	7	0.01	15
	GGTGTCGTAGGGCCGAACTCATTCGTTGCCAGGCCCCGTGC	0	0	1	0.02	0	0	0	0	0	0	7	0.01	5	0	13
	AGTGTTGTAGGGCCGAACTCAATCGTTGCCAGGCCCCGTGC	8	0.06	0	0	1	0.01	2	0	0	0	0	0	0	0	11
	GGTGTCGTAGGGCCGAACTCATTCGTTCCAGGGCCCCGTGC	1	0	0	0	0	0	3	0.01	1	0	1	0	4	0	10
	AGTGTTGTAGGGCCGAACTCAATCGTTCCAAGGCCCCGTGC	5	0.04	3	0.06	1	0.01	1	0	0	0	0	0	0	0	10
	GGTGTCGTAGGGCCGAACATCATCGTTGCCAGGCCCCGTGC	0	0	1	0.02	0	0	2	0	3	0.01	2	0	2	0	10
GTGTGTGTAGGGCCAACTCATCGTTCCAGGCCCCGTGC	Total Number of Reads = 1927	Number of Unique Sequences = 90
	GTGTGTGTAGGGCCAACTCATCGTTCCAGGCCCCGTGC	22	0.16	2	0.12	16	0.19	205	0.28	39	0.29	226	0.46	232	0.66	742
	GAGTGTGTAGGGCCAACTCATCGTTCCAGGCCCCGTGC	66	0.5	9	0.56	36	0.43	270	0.37	37	0.28	124	0.25	33	0.09	575
	GATGTGTGTAGGGCCAACTCATCGTTCCAGGCCCCGTGC	20	0.15	0	0	8	0.09	83	0.11	6	0.04	39	0.08	8	0.02	164
	GGTGTGCGTAGGGCCAACTCATCGTTCCAGGCCCCGTGC	0	0	0	0	1	0.01	12	0.01	7	0.05	22	0.04	15	0.04	57
	GATGTGTGTAGGCCGAACTCATCGTTCCAGGCCCCGTGC	2	0.01	0	0	3	0.03	27	0.03	6	0.04	5	0.01	4	0.01	47
	GAGTGCGTAGGGCCAACTCATCGTTCCAGGCCCCGTGC	1	0	0	0	3	0.03	12	0.01	7	0.05	12	0.02	3	0	38
	ATGTGTGTAGGGCCAACTCATCGTTCCAGGCCCCGTGC	4	0.03	0	0	2	0.02	16	0.02	2	0.01	8	0.01	2	0	34
	GTGTGCGTAGGGCCAACTCATCGTTCCAGGCCCCGTGC	0	0	0	0	1	0.01	13	0.01	2	0.01	3	0	10	0.02	29
	GGTGTGTGTAGGGCCAACTCATCGTTCCAGGCCCCGTGC	1	0	0	0	1	0.01	11	0.01	4	0.03	1	0	3	0	21
	GATGTGTGTAGGGCCGAATCATCGTTCCAGGCCCCGTGC	0	0	2	0.12	1	0.01	12	0.01	2	0.01	3	0	0	0	20
	GATGTGCGTAGGGCCAACTCATCGTTCCAGGCCCCGTGC	0	0	0	0	2	0.02	6	0	1	0	2	0	1	0	12
	GATGTGTGTGGGCCGAACTCATCGTTCCAGGCCCCGTGC	0	0	0	0	1	0.01	4	0	2	0.01	3	0	1	0	11
	GGGTGCGTAGGGCCAACTCATCGTTCCAGGCCCCGTGC	0	0	0	0	0	0	0	0	1	0	4	0	5	0.01	10
GGTGTCGTAGGGCCGAACCTCATTCCGATGCCCAGGCCGTCG	Total Number of Reads = 231	Number of Unique Sequences = 18
	GGTGTCGTAGGGCCGAACCTCATTCCGATGCCCAGGCCGTCG	1	0.5	2	1	2	1	15	0.83	4	0.3	61	0.66	79	0.77	164
	GGTGTCGTAGGGCCGAACCTCATTCCGATGCCCAGGCCTGCG	0	0	0	0	0	0	1	0.05	2	0.15	5	0.05	8	0.07	16
	GGTGTCGTAGGGCCGAACCTCATTCCGATGCCCAGGCCCGCG	0	0	0	0	0	0	0	0	1	0.07	9	0.09	2	0.01	12
	GGTGTCGTAGGGCCGAACCTCATTCCGATGCCCGGCCTGTCG	0	0	0	0	0	0	0	0	3	0.23	5	0.05	1	0	9
	GGTGTCGTAGGGCCGAACCTCGTTCCGATGCCCAGGCCGTCG	0	0	0	0	0	0	1	0.05	0	0	2	0.02	4	0.03	7
	GGTGTCGTAGGGCCGAACCATCTTCCGATGCCCAGGCCGTCG	0	0	0	0	0	0	1	0.05	0	0	3	0.03	2	0.01	6
	GGTGTCGTAGGGCCGAACCTCATTCCGATGCCCGGCCCGTCG	0	0	0	0	0	0	0	0	1	0.07	2	0.02	3	0.02	6
GAGTGTGTAGGGCCGAAACTCATCGTTCCAGGCCCCCGTGC	Total Number of Reads = 892	Number of Unique Sequences = 144
	GAGTGTGTAGGGCCGAAACTCATCGTTCCAGGCCCCCGTGC	20	0.14	8	0.24	16	0.25	72	0.24	17	0.22	23	0.15	7	0.05	163
	GTGAGTGTAGGGCCGAAACTCATCGTTCCAGGCCCCCGTGC	2	0.01	0	0	5	0.08	29	0.09	11	0.14	41	0.27	46	0.34	134
	GAGTGTGTAGGGCCCGAACTCATCGTTCCAGGCCCCCGTGC	12	0.08	0	0	5	0.08	34	0.11	4	0.05	11	0.07	4	0.02	70
	AGTGTGTAGGGCCGAAACTCATCGTTCCAGGCCCCCGTGC	26	0.18	5	0.15	6	0.09	21	0.07	2	0.02	0	0	3	0.02	63
	GTGTGTGTAGGGCCGAAACTCATCGTTCCAGGCCCCCGTGC	3	0.02	0	0	3	0.04	13	0.04	1	0.01	18	0.12	10	0.07	48
	AGTGTTTGTAGGGCCGAAACTCATCGTTCCAGGCCCCCGTGC	20	0.14	5	0.15	5	0.08	8	0.02	1	0.01	0	0	1	0	40
	TGAGTGTAGGGCCGAAACTCATCGTTCCAGGCCCCCGTGC	0	0	1	0.03	1	0.01	11	0.03	0	0	3	0.02	7	0.05	23
	GGGTGCGTAGGGCCGAAACTCATCGTTCCAGGCCCCCGTGC	0	0	0	0	0	0	2	0	4	0.05	8	0.05	7	0.05	21
	AGTGTGTAGGGCCGAAACTCATCGTTCCAGGCCCCGGTGC	8	0.05	3	0.09	3	0.04	5	0.01	0	0	0	0	0	0	19
	GTGAGTGTAGGGCCGAAACTCATCGTTCCAAGGCCCCGTGC	1	0	1	0.03	0	0	3	0.01	3	0.04	1	0	7	0.05	16
	GGTGTCGGTAGGGCCGAAACTCATCGTTCCAGGCCCCCGTGC	0	0	0	0	1	0.01	0	0	3	0.04	6	0.04	4	0.02	14
	GAGTGTGTAGGGCCGAAACTCATCGTTCCAAGGCCCCGTGC	2	0.01	0	0	2	0.03	5	0.01	1	0.01	1	0	2	0.01	13
	GAGTGTGTAGGGCCGAAACTCATCGTTCCAGGCCCCGGTGC	2	0.01	1	0.03	0	0	5	0.01	1	0.01	2	0.01	1	0	12
	GTGAGTGTAGGGCCGAAACTCATCGTTCCAGGCCCCGGTGC	0	0	0	0	0	0	4	0.01	1	0.01	3	0.02	2	0.01	10
	AGTGTGTAGGGCCCGAACTCATCGTTCCAGGCCCCCGTGC	2	0.01	2	0.06	2	0.03	3	0.01	1	0.01	0	0	0	0	10
	TGAGTTTGTAGGGCCGAAACTCATCGTTCCAGGCCCCCGTGC	0	0	0	0	0	0	5	0.01	1	0.01	1	0	2	0.01	9
	AGTGTGTAGGGCCGGAACTCATCGTTCCAGGCCCCCGTGC	3	0.02	1	0.03	1	0.01	1	0	0	0	0	0	1	0	7
	GTGTGTGTAGGGCCGAAACTCATCGTTCCAAGGCCCCGTGC	2	0.01	1	0.03	0	0	1	0	0	0	1	0	1	0	6
	GAGTGTGTAGGGCCCGAACTCATCGTTCCAGGCCCCCGTGCC	0	0	0	0	1	0.01	2	0	1	0.01	1	0	1	0	6
	AGTGCGTAGGGCCGAAACTCATCGTTCCAGGCCCCCGTGC	1	0	2	0.06	1	0.01	2	0	0	0	0	0	0	0	6
	GGTGTCCGTAGGGCCGAAACTCATCGTTCCAGGCCCCCGTGC	0	0	0	0	0	0	2	0	1	0.01	1	0	2	0.01	6
	GGTGTGTGTAGGGCCGAAACTCATCGTTCCAGGCCCCCGTGC	0	0	0	0	0	0	2	0	0	0	3	0.02	1	0	6
	GAGTGTGTAGGGCCCGAACTCATCGTTCCAAGGCCCCGTGC	0	0	0	0	0	0	2	0	1	0.01	1	0	1	0	5
	TGAGTGTAGGGCCGAAACTCATCGTTCCAGGGCCCCGTGC	0	0	0	0	0	0	1	0	2	0.02	0	0	2	0.01	5
AGTGTTGTAGGGCCGAAAGCTCATCGTTCCAGGCCCCGTGC	Total Number of Reads = 932	Number of Unique Sequences = 113
	AGTGTTGTAGGGCCGAAAGCTCATCGTTCCAGGCCCCGTGC	77	0.23	23	0.27	23	0.2	32	0.17	3	0.04	1	0.01	2	0.02	161
	AGTGTTGTAGGGCCGAAAACTCATCGTTCCAGGCCCCGTGC	45	0.13	8	0.09	15	0.13	22	0.12	3	0.04	1	0.01	2	0.02	96
	AGTGTTGTAGGGCCGGAAACTCATCGTTCCAGGCCCCGTGC	42	0.12	7	0.08	11	0.09	21	0.11	6	0.09	1	0.01	2	0.02	90
	GGTGTCGTAGGGCCGAAAGCTCATCGTTCCAGGCCCCGTGC	1	0	2	0.02	3	0.02	11	0.06	9	0.14	21	0.28	34	0.41	81
	GGTGTCGTAGGGCCGAAGGCTCATCGTTCCAGGCCCCGTGC	2	0	1	0.01	3	0.02	11	0.06	10	0.16	25	0.34	19	0.23	71
	AGTGTTGTAGGGCCGAACTTTCATCGTTCCAGGCCCCGTGC	29	0.08	5	0.05	12	0.1	10	0.05	1	0.01	0	0	2	0.02	59
	AGTGTTGTAGGGCCGAACCCTCATCGTTCCAGGCCCCGTGC	21	0.06	9	0.1	6	0.05	2	0.01	1	0.01	0	0	0	0	39
	AGTGTTGTAGGGCCGTAAACTCATCGTTCCAGGCCCCGTGC	14	0.04	3	0.03	3	0.02	7	0.03	5	0.08	1	0.01	0	0	33
	TGAGTTGTAGGGCCGAAAGCTCATCGTTCCAGGCCCCGTGC	1	0	2	0.02	4	0.03	7	0.03	5	0.08	4	0.05	8	0.09	31
	AGTGTTGTAGGGCCGAAACTTCATCGTTCCAGGCCCCGTGC	17	0.05	1	0.01	4	0.03	4	0.02	2	0.03	2	0.02	0	0	30
	AGTGTTGTAGGGCCGAAACCTCATCGTTCCAGGCCCCGTGC	10	0.03	1	0.01	4	0.03	2	0.01	0	0	0	0	0	0	17
	AGTGTTGTAGGGCCGAAGGCTCATCGTTCCAGGCCCCGTGC	9	0.02	0	0	4	0.03	2	0.01	0	0	1	0.01	0	0	16
	AGTGTTGTAGGGCCGAACAATCATCGTTCCAGGCCCCGTGC	5	0.01	0	0	2	0.01	4	0.02	0	0	0	0	1	0.01	12
	GGTGTTGTAGGGCCGGAACCTCATCGTTCCAGGCCCCGTGC	1	0	0	0	0	0	5	0.02	1	0.01	0	0	3	0.03	10
	AGTGTTGTAGGGCCCGAAGCTCATCGTTCCAGGCCCCGTGC	5	0.01	2	0.02	0	0	2	0.01	0	0	0	0	0	0	9
	AGTGTCGTAGGGCCGAAAGCTCATCGTTCCAGGCCCCGTGC	1	0	1	0.01	0	0	3	0.01	2	0.03	2	0.02	0	0	9
	AGTGTTGTAGGGCCGAAACATCATCGTTCCAGGCCCCGTGC	3	0	1	0.01	1	0	3	0.01	0	0	0	0	0	0	8
	AGTGTCGTAGGGCCGAAAACTCATCGTTCCAGGCCCCGTGC	3	0	0	0	1	0	1	0	1	0.01	0	0	0	0	6
	AGTGTTGTAGGGCCGAAAGCTCATCGTTCCAGGCCCCGTG	4	0.01	2	0.02	0	0	0	0	0	0	0	0	0	0	6
	GGTGTTGTAGGGCCGAACCCTCATCGTTCCAGGCCCCGTGC	0	0	0	0	0	0	2	0.01	0	0	3	0.04	0	0	5
	GAGTGTCGTAGGGCCGAAAGCTCATCGTTCCAGGCCCCGTGC	1	0	1	0.01	0	0	0	0	2	0.03	1	0.01	0	0	5
AGTGTCTAGGTACGGCGAACTCATCGTTCCAGGCCCCGTGC	Total Number of Reads = 453	Number of Unique Sequences = 52
	AGTGTCTAGGTACGGCGAACTCATCGTTCCAGGCCCCGTGC	92	0.41	10	0.38	20	0.41	26	0.25	3	0.09	2	0.12	0	0	153
	AGTGTGTAGGTACGGCGAACTCATCGTTCCAGGCCCCGTGC	49	0.22	9	0.34	10	0.2	10	0.09	7	0.22	1	0.06	0	0	86
	AGTGTATTGGTACGGCGAACTCATCGTTCCAGGCCCCGTGC	25	0.11	1	0.03	3	0.06	11	0.1	2	0.06	0	0	0	0	42
	TGAGTCTAGGTACGGCGAACTCATCGTTCCAGGCCCCGTGC	4	0.01	1	0.03	2	0.04	15	0.14	3	0.09	4	0.25	3	0.37	32
	GAGTCTAGGTACGGCGAACTCATCGTTCCAGGCCCCGTGC	6	0.02	1	0.03	5	0.1	14	0.13	1	0.03	3	0.18	1	0.12	31
	GTGACTAGGTACGGCGAACTCATCGTTCCAGGCCCCGTGC	0	0	0	0	0	0	4	0.03	3	0.09	0	0	2	0.25	9
	GATGTCTAGGTACGGCGAACTCATCGTTCCAGGCCCCGTGC	0	0	0	0	0	0	4	0.03	4	0.12	0	0	0	0	8
	AGTGTCGTGGTACGGCGAACTCATCGTTCCAGGCCCCGTGC	5	0.02	0	0	1	0.02	1	0	1	0.03	0	0	0	0	8
	AGTGTATCGGTACGGCGAACTCATCGTTCCAGGCCCCGTGC	6	0.02	0	0	0	0	1	0	0	0	0	0	0	0	7
	AGAGTCTAGGTACGGCGAACTCATCGTTCCAGGCCCCGTGC	3	0.01	1	0.03	0	0	0	0	1	0.03	1	0.06	0	0	6
	AGTGTATAGGTACGGCGAACTCATCGTTCCAGGCCCCGTGC	3	0.01	0	0	2	0.04	1	0	0	0	0	0	0	0	6
	GTGTCTAGGTACGGCGAACTCATCGTTCCAGGCCCCGTGC	0	0	0	0	1	0.02	3	0.02	0	0	1	0.06	0	0	5
	GAGTAGTTAGGTACGGCGAACTCATCGTTCCAGGCCCCGTGC	2	0	0	0	1	0.02	1	0	1	0.03	0	0	0	0	5
	GTGACTTGGTACGGCGAACTCATCGTTCCAGGCCCCGTGC	0	0	0	0	0	0	2	0.01	1	0.03	1	0.06	0	0	4
	AGAGTGTAGGTACGGCGAACTCATCGTTCCAGGCCCCGTGC	2	0	0	0	0	0	0	0	2	0.06	0	0	0	0	4
	GAGTCGTTAGGTACGGCGAACTCATCGTTCCAGGCCCCGTGC	1	0	0	0	0	0	1	0	1	0.03	1	0.06	0	0	4
	AGTGTCTAGGTACGGCGAACTCATCGTTCCAGGCCCCGTG	2	0	0	0	1	0.02	0	0	0	0	0	0	0	0	3
GGTGTCGTAGGGCCGAACTCATCGTTCCAAAAGGCCCCGTGC	Total Number of Reads = 232	Number of Unique Sequences = 27
	GGTGTCGTAGGGCCGAACTCATCGTTCCAAAAGGCCCCGTGC	4	0.28	1	0.33	5	0.55	34	0.61	22	0.66	49	0.76	38	0.7	153
	AGTGTTGTAGGGCCGAACTCATCGTTCCAAAAGGCCCCGTGC	6	0.42	2	0.66	3	0.33	9	0.16	1	0.03	0	0	0	0	21
	GGTGTCGTAGGGCCGAACTCATCGTTCCCAAGGGCCCCGTGC	2	0.14	0	0	0	0	1	0.01	3	0.09	2	0.03	3	0.05	11
	GGTGTCGTAGGGCCGAACTCATCGTTCCAAAGGCCCCCGTGC	1	0.07	0	0	0	0	2	0.03	0	0	1	0.01	1	0.01	5
	GGTGTCGTAGGGCCGAACTCATCGTTCCCCAAGGCCCCGTGC	0	0	0	0	1	0.11	0	0	0	0	2	0.03	2	0.03	5
	GGTGTCGTAGGGCCGAACTCATCGTTGCCCAAGGCCCCGTGC	0	0	0	0	0	0	0	0	1	0.03	1	0.01	2	0.03	4
	GGTGTCGTAGGGCCGAACTCATCGTTCCCAAAGGCCCCGTGC	0	0	0	0	0	0	0	0	1	0.03	1	0.01	1	0.01	3
	GGTGTCGTAGGGCCGAACTCATCGTTCCAAGGGGCCCCGTGC	0	0	0	0	0	0	0	0	1	0.03	0	0	2	0.03	3
	GGTGTCGTAGGGCCGAACTCATCGTTCCAAAGGCCCCAGTGC	0	0	0	0	0	0	0	0	0	0	3	0.04	0	0	3
	GGTGCGTAGGGCCGAACTCATCGTTCCAAAAGGCCCCGTGC	0	0	0	0	0	0	0	0	1	0.03	2	0.03	0	0	3
	GGTGTCGTAGGGCCGAACTCATCGTTCCAAAAAGGCCCGTGC	0	0	0	0	0	0	1	0.01	0	0	0	0	1	0.01	2
	GGTGTTGTAGGGCCGAACTCATCGTTCCAAAAGGCCCCGTGC	0	0	0	0	0	0	1	0.01	0	0	1	0.01	0	0	2
	AGTGTCGTAGGGCCGAACTCATCGTTCCAAAAGGCCCCGTGC	1	0.07	0	0	0	0	1	0.01	0	0	0	0	0	0	2
	GTGTCGTAGGGCCGAACTCATCGTTCCCAAGGGCCCCGTGC	0	0	0	0	0	0	0	0	1	0.03	0	0	1	0.01	2
GGGTGTCGTAGGGCCGAACTCATCGTCCAGGCCCGTGC	Total Number of Reads = 718	Number of Unique Sequences = 113
	GGGTGTCGTAGGGCCGAACTCATCGTCCAGGCCCGTGC	3	0.08	3	0.33	4	0.14	21	0.13	21	0.21	49	0.24	50	0.25	151
	GTGAGTCGTAGGGCCGAACTCATCGTCCAGGCCCGTGC	1	0.02	0	0	0	0	19	0.12	10	0.1	36	0.18	35	0.17	101
	GTGTGTCGTAGGGCCGAACTCATCGTCCAGGCCCGTGC	0	0	0	0	1	0.03	14	0.09	5	0.05	14	0.07	15	0.07	49
	GAGTGTCGTAGGGCCGAACTCATCGTCCAGGCCCGTGC	3	0.08	0	0	4	0.14	20	0.12	6	0.06	7	0.03	3	0.01	43
	GATGTGTCGTAGGGCCGAACTCATCGTCCAGGCCCGTGC	7	0.2	1	0.11	2	0.07	9	0.05	8	0.08	5	0.02	1	0	33
	GGTGGTCGTAGGGCCGAACTCATCGTCCAGGCCCGTGC	1	0.02	0	0	3	0.11	4	0.02	5	0.05	11	0.05	8	0.04	32
	GTGAGTCGTAGGGCCGAACTCATCTTCCAGGCCCGTGC	0	0	0	0	0	0	2	0.01	2	0.02	6	0.03	17	0.08	27
	GGGTGTCGTAGGGCCGAACTCATCGTTCAGGCCCGTGC	1	0.02	0	0	0	0	4	0.02	4	0.04	5	0.02	7	0.03	21
	GGGTGTCGTAGGGCCGAACTCACGTTCCAGGCCCGTGC	0	0	0	0	0	0	3	0.01	7	0.07	6	0.03	5	0.02	21
	GTGTGTCGTAGGGCCGAACTCATCTTCCAGGCCCGTGC	0	0	0	0	0	0	7	0.04	0	0	4	0.02	5	0.02	16
	GGTCGTCGTAGGGCCGAACTCATCGTCCAGGCCCGTGC	0	0	0	0	1	0.03	0	0	5	0.05	4	0.02	2	0.01	12
	GGGTGTCGTAGGGCCGAACTCATCGTCCAGCCCCGTGC	0	0	0	0	2	0.07	1	0	2	0.02	3	0.01	4	0.02	12
	GGGTGTCGTAGGGCCGAACTCATCGTTCAGCCCCGTGC	1	0.02	0	0	1	0.03	2	0.01	2	0.02	2	0.01	2	0.01	10
	GGATGTCGTAGGGCCGAACTCATCGTCCAGGCCCGTGC	1	0.02	0	0	0	0	1	0	1	0.01	3	0.01	2	0.01	8
	GGATGTCGTAGGGCCGAACTCATCGTTCAGGCCCGTGC	1	0.02	0	0	0	0	3	0.01	0	0	1	0	3	0.01	8
	GAGTGTCGTAGGGCCGAACTCATCGTTCAGGCCCGTGC	1	0.02	0	0	0	0	3	0.01	2	0.02	0	0	1	0	7
	GGATGTCGTAGGGCCGAACTCATCTTCCAGGCCCGTGC	0	0	0	0	1	0.03	0	0	3	0.03	2	0.01	1	0	7
	GGGTGTCGTAGGGCCGAACTCATCTTCCAGGCCCGTGC	0	0	0	0	0	0	2	0.01	1	0.01	0	0	4	0.02	7
	GAGTGTTGTAGGGCCGAACTCATCGTCCAGGCCCGTGC	1	0.02	1	0.11	0	0	4	0.02	0	0	0	0	0	0	6
	GAGTGTCGTAGGGCCGAACTCATCTTCCAGGCCCGTGC	0	0	1	0.11	0	0	3	0.01	0	0	2	0.01	0	0	6
	AGATGTTGTAGGGCCGAACTCATCGTCCAGGCCCGTGC	2	0.05	1	0.11	2	0.07	0	0	0	0	0	0	1	0	6
	TGGAGTTGTAGGGCCGAACTCATCGTCCAGGCCCGTGC	1	0.02	0	0	0	0	1	0	2	0.02	1	0	0	0	5
	ATGTGTTGTAGGGCCGAACTCATCGTCCAGGCCCGTGC	0	0	0	0	1	0.03	2	0.01	0	0	1	0	0	0	4
	GGGTGTCGTAGGGCCGAACTCATGTTCCAGGCCCGTGC	1	0.02	0	0	0	0	0	0	1	0.01	1	0	1	0	4
	GTGAGTCGTAGGGCCGAACTCATCGTCCAGCCCCGTGC	0	0	0	0	0	0	0	0	1	0.01	3	0.01	0	0	4
GGTGTCGGTAGGGCCGAACTCATCGTTCCCAGGCCCGTGC	Total Number of Reads = 1403	Number of Unique Sequences = 105
	GGTGTCGGTAGGGCCGAACTCATCGTTCCCAGGCCCGTGC	2	0.02	6	0.11	18	0.2	36	0.16	131	0.48	210	0.58	170	0.51	573
	AGTGTTGGTAGGGCCGAACTCATCGTTCCCAGGCCCGTGC	49	0.53	15	0.28	30	0.34	36	0.16	18	0.06	1	0	2	0	151
	GGGTGTCGGTAGGGCCGAACTCATCGTTCCCAGGCCCGTGC	2	0.02	1	0.01	7	0.08	14	0.06	46	0.17	39	0.1	34	0.1	143
	TGAGTTGGTAGGGCCGAACTCATCGTTCCCAGGCCCGTGC	6	0.06	2	0.03	6	0.06	18	0.08	27	0.1	21	0.05	34	0.1	114
	GTGTGTGTAGGGCCGAACTCATCGTTCCCAGGCCCGTGC	0	0	0	0	2	0.02	44	0.2	3	0.01	27	0.07	34	0.1	110
	GGTGTGTGTAGGGCCGAACTCATCGTTCCCAGGCCCGTGC	0	0	0	0	0	0	15	0.06	3	0.01	6	0.01	5	0.01	29
	GATGTGTGTAGGGCCGAACTCATCGTTCCCAGGCCCGTGC	5	0.05	2	0.03	3	0.03	10	0.04	4	0.01	2	0	2	0	28
	GTGTCGGTAGGGCCGAACTCATCGTTCCCAGGCCCGTGC	0	0	0	0	1	0.01	3	0.01	1	0	7	0.01	2	0	14
	GGTGTCGGTAGGGCCGAACTCATCGTTGCCAGGCCCGTGC	0	0	0	0	2	0.02	1	0	2	0	5	0.01	4	0.01	14
	GGTGGTCGTAGGGCCGAACTCATCGTTGCCAGGCCCGTGC	0	0	0	0	3	0.03	1	0	2	0	4	0.01	4	0.01	14
	GAGTGTTGGTAGGGCCGAACTCATCGTTCCCAGGCCCGTGC	2	0.02	3	0.05	2	0.02	3	0.01	3	0.01	0	0	0	0	13
	GGTGGTCGTAGGGCCGAACTCATCGTTCCCAGGCCCGTGC	0	0	0	0	0	0	1	0	1	0	5	0.01	3	0	10
	GGTGTGTCGGTAGGGCCGAACTCATCGTTCCCAGGCCCGTGC	1	0.01	0	0	0	0	4	0.01	2	0	1	0	1	0	9
	ATGTGTTGGTAGGGCCGAACTCATCGTTCCCAGGCCCGTGC	3	0.03	2	0.03	1	0.01	2	0	0	0	1	0	0	0	9
	TGATGTTGGTAGGGCCGAACTCATCGTTCCCAGGCCCGTGC	1	0.01	0	0	1	0.01	1	0	2	0	1	0	3	0	9
	GGTGTCGGTAGGGCCGAACTCATCGTTCCCAGGCCCGTG	1	0.01	0	0	0	0	0	0	2	0	3	0	2	0	8
	AGTGTTGTAAGGGCCGAACTCATCGTTGCCAGGCCCGTGC	1	0.01	4	0.07	1	0.01	1	0	0	0	1	0	0	0	8
TGAGTTGTAAGGCCGAACTCATCGTTCCAGGCCCCGTGC	Total Number of Reads = 3583	Number of Unique Sequences = 174
	TGAGTTGTAAGGCCGAACTCATCGTTCCAGGCCCCGTGC	121	0.18	37	0.25	104	0.31	425	0.42	141	0.48	265	0.61	457	0.63	1550
	TGAGTTGTTGGGCCGAACTCATCGTTCCAGGCCCCGTGC	160	0.24	27	0.18	59	0.17	234	0.23	42	0.14	44	0.1	67	0.09	633
	AGTGTTGGTAGGCCGAACTCATCGTTCCAGGCCCCGTGC	116	0.17	31	0.21	61	0.18	54	0.05	19	0.06	4	0	6	0	291
	AGTGTTCGTAGGCCGAACTCATCGTTCCAGGCCCCGTGC	68	0.1	14	0.09	28	0.08	35	0.03	4	0.01	1	0	0	0	150
	TGAGTTGGTAGGCCGAACTCATCGTTCCAGGCCCCGTGC	8	0.01	2	0.01	13	0.03	37	0.03	23	0.07	17	0.03	49	0.06	149
	AGTGTTAGTAGGCCGAACTCATCGTTCCAGGCCCCGTGC	50	0.07	8	0.05	14	0.04	25	0.02	3	0.01	1	0	1	0	102
	TGAGTTGGAGGGCCGAACTCATCGTTCCAGGCCCCGTGC	2	0	6	0.04	3	0	27	0.02	3	0.01	18	0.04	17	0.02	76
	AGAGTTGTAAGGCCGAACTCATCGTTCCAGGCCCCGTGC	19	0.02	0	0	2	0	13	0.01	8	0.02	9	0.02	8	0.01	59
	TGAGTTTGTAGGCCGAACTCATCGTTCCAGGCCCCGTGC	1	0	2	0.01	6	0.01	16	0.01	8	0.02	6	0.01	12	0.01	51
	TGAGTTCGTAGGCCGAACTCATCGTTCCAGGCCCCGTGC	4	0	0	0	2	0	10	0	5	0.01	7	0.01	15	0.02	43
	TGAGTTGCTAGGCCGAACTCATCGTTCCAGGCCCCGTGC	2	0	1	0	2	0	6	0	2	0	4	0	10	0.01	27
	AGTGTTGCTAGGCCGAACTCATCGTTCCAGGCCCCGTGC	10	0.01	0	0	6	0.01	9	0	2	0	0	0	0	0	27
	GTGAGTTCGTAGGCCGAACTCATCGTTCCAGGCCCCGTGC	0	0	0	0	2	0	5	0	1	0	5	0.01	5	0	18
GTGTGTCGTAGGGCCAACTCATCGTTCCAGGCCCCGTGC	Total Number of Reads = 1000	Number of Unique Sequences = 87
	GTGTGTCGTAGGGCCAACTCATCGTTCCAGGCCCCGTGC	12	0.21	0	0	6	0.16	123	0.35	18	0.2	133	0.51	136	0.63	428
	GATGTGTCGTAGGGCCAACTCATCGTTCCAGGCCCCGTGC	11	0.19	1	0.25	14	0.37	70	0.2	10	0.11	27	0.1	13	0.06	146
	GATGTGTCGTGGGCCGAACTCATCGTTCCAGGCCCCGTGC	7	0.12	1	0.25	4	0.1	47	0.13	28	0.31	24	0.09	11	0.05	122
	GGTGTGTCGTAGGGCCAACTCATCGTTCCAGGCCCCGTGC	1	0.01	0	0	2	0.05	18	0.05	7	0.07	16	0.06	17	0.07	61
	GATGTGTCGTAGGCCGAACTCATCGTTCCAGGCCCCGTGC	6	0.1	1	0.25	2	0.05	18	0.05	7	0.07	11	0.04	3	0.01	48
	GATGTGTCGTAGGGCCGAATCATCGTTCCAGGCCCCGTGC	3	0.05	0	0	2	0.05	11	0.03	2	0.02	6	0.02	0	0	24
	GGTGAGTCGTAGGGCCAACTCATCGTTCCAGGCCCCGTGC	0	0	0	0	0	0	1	0	0	0	4	0.01	4	0.01	9
	GTGTGTCGTAGGGCCAACTCATCGTTCCAGGCCCCGTG	0	0	0	0	0	0	2	0	0	0	5	0.01	2	0	9
	GGTGTGGCGTAGGGCCAACTCATCGTTCCAGGCCCCGTGC	0	0	0	0	1	0.02	1	0	2	0.02	3	0.01	1	0	8
	GTGTGTGGTAGGGCCAACTCATCGTTCCAGGCCCCGTGC	0	0	0	0	0	0	4	0.01	0	0	1	0	3	0.01	8
	GTGTGTCGTAGGGCTAACTCATCGTTCCAGGCCCCGTGC	0	0	0	0	0	0	2	0	0	0	2	0	4	0.01	8
	GGATGTGTCGTAGGGCCAACTCATCGTTCCAGGCCCCGTGC	0	0	0	0	0	0	5	0.01	1	0.01	0	0	1	0	7
	TGTGTCGTAGGGCCAACTCATCGTTCCAGGCCCCGTGC	1	0.01	0	0	0	0	0	0	0	0	2	0	3	0.01	6
	ATGTGTTGTAGGGCCAACTCATCGTTCCAGGCCCCGTGC	2	0.03	0	0	2	0.05	2	0	0	0	0	0	0	0	6
	GTGTGTCGTAGGGCCAACTCATCGTTCCAGGCCCCGTCG	0	0	0	0	0	0	3	0	1	0.01	0	0	1	0	5
GGTGTCGTAGGCCGAACTCATCGTTCCCAGGCCCGTGC	Total Number of Reads = 863	Number of Unique Sequences = 86
	GGTGTCGTAGGCCGAACTCATCGTTCCCAGGCCCGTGC	2	0.01	2	0.03	8	0.1	46	0.24	37	0.48	133	0.76	94	0.68	322
	AGTGTTGTAGGCCGAACTCATCGTTCCCAGGCCCGTGC	56	0.37	14	0.21	32	0.42	31	0.16	8	0.1	4	0.02	0	0	145
	TGAGTTGTAGGCCGAACTCATCGTTCCCAGGCCCGTGC	3	0.02	6	0.09	8	0.1	37	0.19	12	0.15	14	0.08	28	0.2	108
	AGTGTTGTAGGCCGAACTCATCGTTGCCAGGCCCGTGC	24	0.16	27	0.41	3	0.04	14	0.07	2	0.02	0	0	0	0	70
	GGGTGTCGTAGGCCGAACTCATCGTTCCCAGGCCCGTGC	0	0	0	0	1	0.01	3	0.01	4	0.05	7	0.04	3	0.02	18
	AGTGTTGTAGGCCGAACTCATCGTTCCAAGCCCCGTGC	9	0.06	1	0.01	1	0.01	4	0.02	0	0	0	0	0	0	15
	GAGTGTTGTAGGCCGAACTCATCGTTCCCAGGCCCGTGC	3	0.02	2	0.03	3	0.04	3	0.01	0	0	1	0	0	0	12
	AGTGTTGTAGGCCGAACTCATCGATTCCAGGCCCGTGC	4	0.02	1	0.01	1	0.01	4	0.02	0	0	0	0	0	0	10
	AGTGTTGTAGGGCCAACTCATCGTTCCCAGGCCCGTGC	5	0.03	0	0	2	0.02	3	0.01	0	0	0	0	0	0	10
	TGAGTTGAGGGCCGAACTCATCGTTCCCAGGCCCGTGC	1	0	1	0.01	0	0	2	0.01	2	0.02	1	0	2	0.01	9
	TGAGTTGTAGGCCGAACTCATCGTTCCAAGGCCCGTGC	0	0	0	0	0	0	6	0.03	0	0	1	0	1	0	8
	TGAGTTGTAGGCCGAACTCATCGTTCCCAGGCCCGTGT	2	0.01	1	0.01	2	0.02	1	0	1	0.01	0	0	0	0	7
	GGTGTCGTAGGCCGAACTCATCGTTCCCAGGCCCGTGT	0	0	0	0	1	0.01	2	0.01	0	0	2	0.01	1	0	6
	GTGTGTGGTAGGCCGAACTCATCGTTCCCAGGCCCGTGC	1	0	0	0	0	0	2	0.01	1	0.01	2	0.01	0	0	6
	AGTGTTGTAGGCCGAACTCATCGTTCCAAGGCCCGTGC	2	0.01	0	0	2	0.02	1	0	0	0	0	0	0	0	5
GGTGTCGTAGGGCCGAACCTCGTTCCATGCCCGCCGCG	Total Number of Reads = 400	Number of Unique Sequences = 48
	GGTGTCGTAGGGCCGAACCTCGTTCCATGCCCGCCGCG	0	0	0	0	3	0.33	15	0.34	6	0.26	64	0.45	56	0.31	144
	GGTGTCGTAGGGCCGAACCTCATTCCGTGCCCGCCGCG	0	0	0	0	2	0.22	2	0.04	1	0.04	16	0.11	38	0.21	59
	GGTGTCGTAGGGCCGAACCTCGATTCCTGCCCGCCGCG	0	0	0	0	0	0	1	0.02	4	0.17	11	0.07	17	0.09	33
	GGTGTCGTAGGGCCGAACCTCATCCGATGCCCGCCGCG	0	0	1	0.33	1	0.11	2	0.04	2	0.08	12	0.08	11	0.06	29
	GGTGTCGTAGGGCCGAACCTCATTCCATGCCCGCCGCG	0	0	1	0.33	0	0	2	0.04	4	0.17	12	0.08	8	0.04	27
	GGTGTCGTAGGGCCGAACCTCTTCCGATGCCCGCCGCG	0	0	0	0	1	0.11	4	0.09	1	0.04	4	0.02	7	0.03	17
	GGTGTCGTAGGGCCGAACCTCGTTCCATGCCCGCTGCG	0	0	0	0	0	0	1	0.02	2	0.08	1	0	11	0.06	15
	GGTGTCGTAGGGCCGAACCTCGATCCATGCCCGCCGCG	0	0	0	0	0	0	2	0.04	0	0	7	0.05	5	0.02	14
	AGTGTTGTAGGGCCGAACCTCGTTCCATGCCCGCCGCG	3	0.6	1	0.33	0	0	2	0.04	0	0	0	0	0	0	6
	GGTGTCGTAGGGCCGAACCTCGTCCGATGCCCGCCGCG	0	0	0	0	0	0	0	0	0	0	1	0	3	0.01	4
	TGAGTTGTAGGGCCGAACCTCGTTCCATGCCCGCCGCG	0	0	0	0	0	0	3	0.06	0	0	1	0	0	0	4
	GGTGTCGTAGGGCCGAACCTCGTTCCATGCCCAGCGCG	0	0	0	0	0	0	1	0.02	0	0	2	0.01	1	0	4
	TGAGTTGTAGGGCCGAACCTCGATCCATGCCCGCCGCG	0	0	0	0	0	0	1	0.02	0	0	1	0	0	0	2
	GGGTGTCGTAGGGCCGAACCTCGTTCCATGCCCGCCGCG	0	0	0	0	0	0	0	0	0	0	1	0	1	0	2
	GGTGTCGTAGGGCCGAACCTCGTTCCATGCCCGCCGTGC	0	0	0	0	0	0	0	0	0	0	0	0	2	0.01	2
	GGTGTCGTAGGGCCGAACCTCGTTCCATGCCCCGCGCG	0	0	0	0	0	0	0	0	0	0	0	0	2	0.01	2
	GAGTGTCGTAGGGCCGAACCTCGTTCCATGCCCGCCGCG	1	0.2	0	0	0	0	1	0.02	0	0	0	0	0	0	2
	GAGTGTCGTAGGGCCGAACCTCGATCCATGCCCGCCGCG	0	0	0	0	1	0.11	0	0	0	0	0	0	1	0	2
	GGTGTCGTAGGGCCGAACCTCGATTCATGCCCGCCGCG	0	0	0	0	0	0	0	0	0	0	2	0.01	0	0	2
	AGTGTTGTAGGGCCGAACCTCATTCCATGCCCGCCGCG	1	0.2	0	0	0	0	1	0.02	0	0	0	0	0	0	2
GGACCTATGCAGTAGCCAGTGTGGACCTGGGCTGCCCCCC	Total Number of Reads = 391	Number of Unique Sequences = 41
	GGACCTATGCAGTAGCCAGTGTGGACCTGGGCTGCCCCCC	143	0.36	0	0	0	0	1	0.25	0	0	0	0	0	0	144
	GGACCTATGCAGTAGCCAGTGTGGACTGGGCCTGCCCCCC	52	0.13	0	0	0	0	2	0.5	0	0	0	0	0	0	54
	GGACCTATGCAGTAGCCAGTGTGGGACTGGGCTGCCCCCC	47	0.12	0	0	0	0	0	0	0	0	0	0	0	0	47
	GGACCTATGCAGTAGCCAGTGTGGACCTGGGCTGCCCCC	30	0.07	0	0	0	0	0	0	0	0	0	0	0	0	30
	GGACCTATGCAGTAGCCAGTGTGGACCTGGGCTGCCCCCCC	20	0.05	0	0	0	0	0	0	0	0	0	0	0	0	20
	GGACCTATGCAGTAGCCAGTGTGGGACTGGGCTGCCCCCCC	12	0.03	0	0	0	0	0	0	0	0	0	0	0	0	12
	GGGACCTATGCAGTAGCCAGTGTGGACCTGGGCTGCCCCCC	10	0.02	0	0	0	0	0	0	0	0	0	0	0	0	10
	GGACCTATGCAGTAGCCAGTGTGGACTGGGGCTGCCCCCCC	9	0.02	0	0	0	0	0	0	0	0	0	0	0	0	9
	GGACCTATGCAGTAGCCAGTGTGGACTGGGGCTGCCCCCC	9	0.02	0	0	0	0	0	0	0	0	0	0	0	0	9
	GGGACCTATGCAGTAGCCAGTGTGGGACTGGGCTGCCCCCC	5	0.01	0	0	0	0	0	0	0	0	0	0	0	0	5
	GGACCTATGCAGTAGCCAGTGTGGGACTGGGCTGCCCCC	4	0.01	0	0	0	0	0	0	0	0	0	0	0	0	4
	GGACCTATGCAGTAGCCAGTGTGGACTGGGCCTGCCCCCCC	4	0.01	0	0	0	0	0	0	0	0	0	0	0	0	4
	GGGACCTATGCAGTAGCCAGTGTGGACTGGGCCTGCCCCCC	3	0	0	0	0	0	0	0	0	0	0	0	0	0	3
	GGGACCTATGCAGTAGCCAGTGTGGACTGGGGCTGCCCCCCC	3	0	0	0	0	0	0	0	0	0	0	0	0	0	3
	GGGACCTATGCAGTAGCCAGTGTGGGACTGGGCTGCCCCCCC	3	0	0	0	0	0	0	0	0	0	0	0	0	0	3
	GGACCTATGCAGTAGCCAGTGTGGACCTGGGCCTGCCCCCC	2	0	0	0	0	0	0	0	0	0	0	0	0	0	2
	GGACCTATGCAGTAGCCAGTGTAGACCTGGGCTGCCCCCC	2	0	0	0	0	0	0	0	0	0	0	0	0	0	2
	GGACCTATGCAGTAGCCAGTGTGGAACTGGGCTGCCCCCC	2	0	0	0	0	0	0	0	0	0	0	0	0	0	2
	GGACCTATGCAGTAGCCAGTGCGGGACTGGGCTGCCCCCC	2	0	0	0	0	0	0	0	0	0	0	0	0	0	2
	GGACCTATGCAGTAGCCAGTGTCGGACTGGGCTGCCCCCC	1	0	0	0	0	0	1	0.25	0	0	0	0	0	0	2
	GGACCTATGCAGTAGCCAGTGTGGAGCTGGGCTGCCCCCC	2	0	0	0	0	0	0	0	0	0	0	0	0	0	2
	GGACCTATGCAGTAGCCAGTATGGACTGGGGCTGCCCCCCC	2	0	0	0	0	0	0	0	0	0	0	0	0	0	2
	GGACCTATGCAGTAGCCAGTGGTGGACTGGGCTGCCCCCC	2	0	0	0	0	0	0	0	0	0	0	0	0	0	2
GGTGTCGTAGGGCCGAACTCAAAATCGTTCCAGGCCCCGTGC	Total Number of Reads = 484	Number of Unique Sequences = 47
	GGTGTCGTAGGGCCGAACTCAAAATCGTTCCAGGCCCCGTGC	1	0.04	2	0.25	5	0.16	24	0.28	23	0.37	58	0.35	30	0.25	143
	GGTGTCGTAGGGCCGAACTCATTTTCGTTCCAGGCCCCGTGC	3	0.14	2	0.25	5	0.16	20	0.24	15	0.24	52	0.32	42	0.35	139
	GGTGTCGTAGGGCCGAACTCCCCATCGTTCCAGGCCCCGTGC	2	0.09	0	0	8	0.25	15	0.18	11	0.17	30	0.18	26	0.22	92
	AGTGTTGTAGGGCCGAACTCAAAATCGTTCCAGGCCCCGTGC	9	0.42	1	0.12	8	0.25	6	0.07	1	0.01	0	0	0	0	25
	TGAGTTGTAGGGCCGAACTCAAAATCGTTCCAGGCCCCGTGC	1	0.04	1	0.12	2	0.06	3	0.03	1	0.01	4	0.02	5	0.04	17
	GGTGTCGTAGGGCCGAACTCGGGATCGTTCCAGGCCCCGTGC	0	0	0	0	0	0	2	0.02	1	0.01	5	0.03	6	0.05	14
	GGTGTCGTAGGGCCGAACTCAAATTCGTTCCAGGCCCCGTGC	0	0	1	0.12	0	0	0	0	1	0.01	1	0	1	0	4
CACTAGCCAGGATAGACCGTAGCAACGTCACCTGCCCGCCC	Total Number of Reads = 206	Number of Unique Sequences = 22
	CACTAGCCAGGATAGACCGTAGCAACGTCACCTGCCCGCCC	141	0.69	1	0.5	0	0	0	0	0	0	1	1	0	0	143
	CACTAGCCAGGATAGACCGTAGCAACGTCACCTGCCCGCC	18	0.08	1	0.5	0	0	0	0	0	0	0	0	0	0	19
	CACTAGCCAGGATAGACCGTAGCAACGTCCACTGCCCGCCC	10	0.04	0	0	0	0	0	0	0	0	0	0	0	0	10
	CACTAGCCAGGATAGACCGTAGCAACGTCAACTGCCCGCCC	8	0.03	0	0	0	0	0	0	0	0	0	0	0	0	8
	CACTAGCCAGGATAGACCGTAGCAACGTCCACTGCCCCCC	5	0.02	0	0	0	0	0	0	0	0	0	0	0	0	5
	CACTAGCCAGGATAGACCGCAGCAACGTCACCTGCCCGCCC	2	0	0	0	0	0	0	0	0	0	0	0	0	0	2
	CACTAGCCAGGATAGACCGTAGCAACGTCAACTGCCCGCC	2	0	0	0	0	0	0	0	0	0	0	0	0	0	2
	CACTAGCCAGGATAGACCGTAGCAACGTCCACTGCCCCCCC	2	0	0	0	0	0	0	0	0	0	0	0	0	0	2
	CACTAGCCAGGATAGACCGTAGCAACGTCCACTGCCCGCC	2	0	0	0	0	0	0	0	0	0	0	0	0	0	2
AGTGTTGTAGGGCCGAAACTCATCGTTCCAGGCCCGTGC	Total Number of Reads = 863	Number of Unique Sequences = 137
	AGTGTTGTAGGGCCGAAACTCATCGTTCCAGGCCCGTGC	111	0.51	30	0.56	29	0.43	57	0.25	10	0.13	6	0.05	1	0	244
	TGAGTTGTAGGGCCGAAACTCATCGTTCCAGGCCCGTGC	11	0.05	5	0.09	9	0.13	42	0.18	14	0.19	26	0.24	36	0.28	143
	AGTGTTGTAGGGCCGAAGCTCATCGTTCCAGGCCCGTGC	25	0.11	6	0.11	5	0.07	13	0.05	1	0.01	0	0	0	0	50
	GGTGTTGTAGGGCCGAAACTCATCGTTCCAGGCCCCTGC	6	0.02	2	0.03	4	0.06	10	0.04	7	0.09	1	0	3	0.02	33
	TGAGTTGTAGGGCCCGAACTCATCGTTCCAGGCCCGTGC	0	0	0	0	0	0	3	0.01	0	0	11	0.1	7	0.05	21
	GTGAGTCGTAGGGCCGAAACTCATCGTTCCAGGCCCGTGC	0	0	0	0	1	0.01	5	0.02	2	0.02	8	0.07	2	0.01	18
	TGAGTTGTAGGGCCGAAACTCATCGTTCCAGCCCCGTGC	1	0	0	0	3	0.04	3	0.01	0	0	3	0.02	8	0.06	18
	TGAGTTGTAGGGCCGAACCTCATCGTCCCAGGCCCGTGC	5	0.02	1	0.01	0	0	4	0.01	2	0.02	4	0.03	2	0.01	18
	TGAGTTGTAGGGCCGAAGCTCATCGTTCCAGGCCCGTGC	0	0	0	0	0	0	6	0.02	3	0.04	1	0	7	0.05	17
	GTGTGTCGTAGGGCCGAAACTCATCGTTCCAGGCCCGTGC	0	0	0	0	0	0	4	0.01	4	0.05	6	0.05	1	0	15
	TGAGTTGTAGGGCCGAACATCATCGTTCCAGGCCCGTGC	2	0	0	0	1	0.01	3	0.01	2	0.02	2	0.01	3	0.02	13
	TGAGTTGTAGGGCCGAACCTCATCGTCCCAGGCCCGTCG	1	0	1	0.01	0	0	2	0	2	0.02	1	0	5	0.04	12
	TGAGTTGTAGGGCCGAACTCGATCGTTCCAGGCCCGTGC	0	0	1	0.01	0	0	3	0.01	0	0	1	0	6	0.04	11
	GTGAGTCGTAGGGCCCGAACTCATCGTTCCAGGCCCGTGC	0	0	0	0	0	0	3	0.01	1	0.01	3	0.02	2	0.01	9
	AGAGTTGTAGGGCCGAAACTCATCGTTCCAGGCCCGTGC	2	0	0	0	0	0	5	0.02	1	0.01	1	0	0	0	9
	AGTGTTGTAGGGCCGAAACTCATCGTTCCAGGCCCGTGT	4	0.01	1	0.01	0	0	2	0	0	0	0	0	0	0	7
	GGTGTTGTAGGGCCGAAACTCATCGTTCCAGGCCCGTGC	0	0	0	0	1	0.01	2	0	0	0	2	0.01	2	0.01	7
	TGAGTTGTAGGGCCGAACTTCATCGTTCCAGGCCCGTGC	0	0	0	0	0	0	3	0.01	0	0	2	0.01	2	0.01	7
	AGTGTTGTAGGGCCGAAACTCATCGTTCCAGGCCCGTG	3	0.01	0	0	1	0.01	2	0	0	0	0	0	0	0	6
	TGAGTTGTAGGGTCCGAACTCATCGTTCCAGGCCCGTGC	0	0	1	0.01	0	0	1	0	1	0.01	1	0	2	0.01	6
	AGTGTTGTAGGGCCGCAACTCATCGTTCCAGGCCCGTGC	1	0	0	0	2	0.03	3	0.01	0	0	0	0	0	0	6
	TGAGTTGTAGGGCCCGAACTCATCGTTCCAGCCCCGTGC	1	0	0	0	0	0	2	0	0	0	0	0	3	0.02	6
	TGAGTTGTAGGGCCGAAACTCATCGTTCCAGGCCCGTGCC	0	0	0	0	0	0	1	0	1	0.01	1	0	3	0.02	6
	GTGAGTCGTAGGGCCGAAGCTCATCGTTCCAGGCCCGTGC	0	0	0	0	0	0	1	0	2	0.02	2	0.01	1	0	6
	TGAGTTGTAGGGCCGAACCTCATCGTCCCAGGCCCGTG	0	0	0	0	2	0.03	2	0	0	0	1	0	1	0	6
	GGAGTTGTAGGGCCGAAACTCATCGTTCCAGGCCCCTGC	0	0	0	0	0	0	2	0	2	0.02	0	0	1	0	5
	AGTGTTGTAGGGCCGAAACTCATCGTTCCAGGCCGGTGC	5	0.02	0	0	0	0	0	0	0	0	0	0	0	0	5
GTGAGTCGTAGGCCGAACTCATCGTTCCAGGCCCGTGC	Total Number of Reads = 1299	Number of Unique Sequences = 149
	GTGAGTCGTAGGCCGAACTCATCGTTCCAGGCCCGTGC	1	0.01	1	0.12	3	0.09	61	0.21	38	0.27	126	0.34	153	0.37	383
	GTGTGTCGTAGGCCGAACTCATCGTTCCAGGCCCGTGC	3	0.05	0	0	0	0	28	0.09	11	0.08	36	0.09	62	0.15	140
	GTGAGTCGTAGGGCCAACTCATCGTTCCAGGCCCGTGC	0	0	0	0	0	0	16	0.05	8	0.05	43	0.11	55	0.13	122
	GAGTGTCGTAGGCCGAACTCATCGTTCCAGGCCCGTGC	8	0.15	2	0.25	8	0.25	62	0.21	14	0.1	17	0.04	7	0.01	118
	GGGTGTCGTAGGCCGAACTCATCGTTCCAGGCCCGTGC	1	0.01	1	0.12	3	0.09	11	0.03	12	0.08	24	0.06	30	0.07	82
	GTGTGTCGTAGGGCCAACTCATCGTTCCAGGCCCGTGC	0	0	0	0	1	0.03	9	0.03	2	0.01	15	0.04	15	0.03	42
	GATGTGTCGTAGGGCCAACTCATCGTTCCAGGCCCGTGC	4	0.07	0	0	1	0.03	7	0.02	0	0	9	0.02	4	0	25
	TGATGTCGTAGGCCGAACTCATCGTTCCAGGCCCGTGC	0	0	0	0	0	0	3	0.01	3	0.02	10	0.02	6	0.01	22
	GGGTGTCGTAGGGCGAACTCATCGTTCCAGGCCCGTGC	1	0.01	0	0	1	0.03	2	0	5	0.03	5	0.01	5	0.01	19
	TGGAGTTGTAGGCCGAACTCATCGTTCCAGGCCCGTGC	3	0.05	0	0	0	0	5	0.01	0	0	2	0	6	0.01	16
	GTGAGTCGTAGGCCGAACTCATCGTTCCAGCCCCGTGC	0	0	0	0	0	0	2	0	2	0.01	6	0.01	4	0	14
	GGATGTCGTAGGCCGAACTCATCGTTCCAGGCCCGTGC	0	0	0	0	0	0	2	0	3	0.02	5	0.01	3	0	13
	ATGAGTTGTAGGCCGAACTCATCGTTCCAGGCCCGTGC	3	0.05	0	0	1	0.03	7	0.02	0	0	1	0	1	0	13
	GGGTGTTGTAGGGCGAACTCATCGTTCCAGCCCCGTGC	1	0.01	0	0	2	0.06	2	0	2	0.01	2	0	1	0	10
	GAGTGTTGTAGGCCGAACTCATCGTTCCAGGCCCGTGC	2	0.03	2	0.25	0	0	4	0.01	1	0	0	0	0	0	9
	GTGAGTTGTAGGCCGAACTCATCGTTCCAGGCCCGTGC	1	0.01	0	0	0	0	4	0.01	1	0	1	0	2	0	9
	GGTGTGTCGTAGGGCCAACTCATCGTTCCAGGCCCGTGC	1	0.01	0	0	1	0.03	1	0	0	0	4	0.01	2	0	9
	GGTCGTCGTAGGCCGAACTCATCGTTCCAGGCCCGTGC	0	0	0	0	0	0	0	0	2	0.01	3	0	4	0	9
	GATGTGTCGTAGGCCGAACTCATCGTTCCAGGCCCGTGC	0	0	0	0	0	0	6	0.02	1	0	2	0	0	0	9
	GTGAGTCGTAGGGCGAACTCATCGTTCCAGGCCCGTGC	0	0	0	0	0	0	0	0	1	0	1	0	6	0.01	8
	GTGTGTCGAGGGCCGAACTCATCGTTCCAGGCCCGTGC	0	0	0	0	0	0	2	0	2	0.01	3	0	1	0	8
	GGGTGTCGTGGGCCGAACTCATCGTTCCAGGCCCGTGC	0	0	0	0	0	0	0	0	0	0	4	0.01	3	0	7
	GTGTGTCGTGGGCCGAACTCATCGTTCCAGGCCCGTGC	0	0	0	0	0	0	1	0	1	0	2	0	3	0	7
	GGGTGTCGAGGGCCGAACTCATCGTTCCAGGCCCGTGC	0	0	0	0	0	0	1	0	2	0.01	3	0	1	0	7
	GGGTGTCGTAGGCCGAACTCATCGTTCCAGCCCCGTGC	0	0	0	0	0	0	2	0	1	0	3	0	1	0	7
GGTGTCGGTAGGGCCGAACTCAATCGTTCCAGGCCCCGTGC	Total Number of Reads = 729	Number of Unique Sequences = 109
	GGTGTCGGTAGGGCCGAACTCAATCGTTCCAGGCCCCGTGC	3	0.18	0	0	6	0.31	6	0.11	22	0.11	62	0.26	40	0.18	139
	GGTGTCGGTAGGGCCGAACCCCATCGTTCCAGGCCCCGTGC	0	0	0	0	0	0	2	0.03	79	0.42	2	0	1	0	84
	GGTGTCGGTAGGGCCGAACTCATCCGTTCCAGGCCCCGTGC	1	0.06	0	0	3	0.15	3	0.05	16	0.08	27	0.11	26	0.11	76
	GGTGTCGTAAGGGCCGAACTCAATCGTTCCAGGCCCCGTGC	0	0	2	0.4	0	0	7	0.13	13	0.06	24	0.1	30	0.13	76
	GGTGTCGTTAGGGCCGAACTCAATCGTTCCAGGCCCCGTGC	1	0.06	0	0	2	0.1	1	0.01	5	0.02	2	0	7	0.03	18
	GGTGTCGGTAGGGCCGAACTTCATCGTTCCAGGCCCCGTGC	1	0.06	0	0	0	0	0	0	3	0.01	8	0.03	5	0.02	17
	GGTGTCCGTAGGGCCGAACTCATCCGTTCCAGGCCCCGTGC	0	0	0	0	0	0	2	0.03	2	0.01	11	0.04	2	0	17
	GGTGTCGCTAGGGCCGAACTCATCCGTTCCAGGCCCCGTGC	0	0	1	0.2	0	0	0	0	0	0	10	0.04	6	0.02	17
	GGTGTCGTAGGGGCCGAACTCAATCGTTCCAGGCCCCGTGC	0	0	0	0	0	0	1	0.01	3	0.01	5	0.02	8	0.03	17
	GGTGTCGGTAGGGCCGAACTCATTCGTTCCAGGCCCCGTGC	0	0	0	0	0	0	1	0.01	1	0	3	0.01	9	0.04	14
	GGTGTCCGTAGGGCCGAACTCAATCGTTCCAGGCCCCGTGC	0	0	0	0	0	0	0	0	5	0.02	5	0.02	4	0.01	14
	GGTGTCGTAAGGGCCGAACTCCATCGTTCCAGGCCCCGTGC	0	0	0	0	0	0	3	0.05	1	0	8	0.03	2	0	14
	GGTGTCGTAAGGGCCGAACTCGATCGTTCCAGGCCCCGTGC	0	0	0	0	0	0	2	0.03	1	0	2	0	8	0.03	13
	GGTGTCAGTAGGGCCGAACTCAATCGTTCCAGGCCCCGTGC	0	0	0	0	1	0.05	0	0	3	0.01	4	0.01	3	0.01	11
	GGTGTCGGTAGGGCCGAACTCGATCGTTCCAGGCCCCGTGC	0	0	0	0	0	0	1	0.01	1	0	5	0.02	3	0.01	10
	GGTGTGCGTAGGGCCGAACTCGATCGTTCCAGGCCCCGTGC	0	0	0	0	0	0	1	0.01	0	0	6	0.02	2	0	9
	GGTGTCGGTAGGGCCGAACTCCATCGTTCCAGGCCCCGTGC	0	0	0	0	0	0	0	0	2	0.01	1	0	4	0.01	7
	GGGTGTCGTAAGGGCCGAACTCAATCGTTCCAGGCCCCGTGC	0	0	0	0	2	0.1	1	0.01	1	0	1	0	2	0	7
	GGTGTCAGTAGGGCCGAACTCATCCGTTCCAGGCCCCGTGC	0	0	0	0	0	0	3	0.05	0	0	0	0	3	0.01	6
	GGTGTCGTTAGGGCCGAACTTCATCGTTCCAGGCCCCGTGC	0	0	0	0	0	0	0	0	2	0.01	1	0	3	0.01	6
	TGAGTTGGTAGGGCCGAACTCAATCGTTCCAGGCCCCGTGC	0	0	0	0	0	0	2	0.03	2	0.01	1	0	1	0	6
	GGTGTCGGTAGGGCCGAACTCATTCGTTCCCAGGCCCGTGC	0	0	0	0	0	0	0	0	0	0	3	0.01	3	0.01	6
	GGGTGTCGGTAGGGCCGAACCCCATCGTTCCAGGCCCCGTGC	0	0	0	0	0	0	0	0	5	0.02	1	0	0	0	6
	GGTGTCGTACGGGCCGAACTCAATCGTTCCAGGCCCCGTGC	0	0	0	0	1	0.05	0	0	0	0	2	0	2	0	5
	GGTGTCGTAAGGGCCGAACTCGATCGTTCCAGGCCCCGTG	0	0	0	0	0	0	1	0.01	0	0	2	0	1	0	4
	GGTGTACGTAGGGCCGAACTCATTCGTTCCAGGCCCCGTGC	0	0	0	0	0	0	1	0.01	1	0	0	0	2	0	4
[truncated: 6,286 more rows]

## Sheet: Ambiguous_Sequences
Sequence	Round1.count	Round2.count	Round3.count	Round4.count	Round5.count	Round6.count	Round7.count	total.count
GGGTGTCGTAGGGCCGAACTCATCGTTCCAGGCCCCGTGC	23531	14383	56383	192457	191734	170694	228109	877291
GAGTGTCGTAGGGCCGAACTCATCGTTCCAGGCCCCGTGC	29038	6033	24688	129717	42190	39572	22515	293753
AGAGTTGTAGGGCCGAACTCATCGTTCCAGGCCCCGTGC	44233	7898	19053	65520	14969	13395	13088	178156
GTGTGTCGTAGGGCCGAACTCATCGTTCCAGGCCCCGTGC	5383	760	3710	51717	11072	56543	41632	170817
AGTGTGTAGGGCCGAACTCATCGTTCCAGGCCCCGTGC	38986	9767	16946	49405	6654	7385	2513	131656
TGAGTGTAGGGCCGAACTCATCGTTCCAGGCCCCGTGC	3231	1227	4544	28849	10273	26514	29817	104455
GGTGTCGTAGGGCCGAACTCATCGTTCCAGGCCCCGTG	1988	702	1763	7961	7772	22583	13673	56442
GGATGTCGTAGGGCCGAACTCATCGTTCCAGGCCCCGTGC	428	228	1032	7010	6719	18910	11707	46034
GAGTGTTGTAGGGCCGAACTCATCGTTCCAGGCCCCGTGC	11828	3700	5199	11592	1906	1364	601	36190
AGTGTTGTAGGGCCGAACTCATCGTTCCAGGCCCCGTGT	20772	2353	2438	7353	1190	364	85	34555
GAGTCGTAGGGCCGAACTCATCGTTCCAGGCCCCGTGC	1432	422	2046	12284	3901	8312	3315	31712
GGGTGTTGTAGGGCCGAACTCATCGTTCCAGGCCCCGTGC	2472	1483	3958	6391	4259	2373	2441	23377
GAGTGCGTAGGGCCGAACTCATCGTTCCAGGCCCCGTGC	940	245	978	8682	3959	5592	2173	22569
GGTGGTCGTAGGGCCGAACTCATCGTTCCAGGCCCCGTGC	438	298	890	3128	3175	6921	5965	20815
AGTGTTGTAGGGCCGAACTCATCGTTCCAGGCCCCGTAC	8222	2649	3364	4528	527	209	80	19579
AGTGTTGTAGGGCCGAACTCATCGTTCCAGGCCCCATGC	9049	2147	2597	3948	547	182	97	18567
AGTGTTGTAGGGCCGAACTTATCGTTCCAGGCCCCGTGC	8573	1981	988	1768	285	111	76	13782
AGTGTTGTAGGGCCGAACTCATCGTTCCAGGCCCCGTG	6856	1045	969	1952	277	119	60	11278
ATGTGTTGTAGGGCCGAACTCATCGTTCCAGGCCCCGTGC	2136	179	597	5865	474	1047	326	10624
GGTGTCGTAGGGCCGAACTCATCGTTCAGGCCCCGTGC	299	83	316	1915	1525	3202	2961	10301
GGTGTCGTAGGGCCGAACTCATCGTTGCCAGGCCCCGTGC	167	359	342	1308	1426	3383	3277	10262
AATGTTGTAGGGCCGAACTCATCGTTCCAGGCCCCGTGC	5781	917	1232	1780	218	106	68	10102
GGTGTCGTAGGGCCGAACTCATCGTTCCAGGCCCCGTAGC	148	89	423	1337	1304	2205	3145	8651
GGGTGTCGTAGGGCCGAAACTCATCGTTCCAGGCCCCGTGC	197	103	299	1066	1407	2416	2785	8273
GGTGTCGTAGGGGCCGAACTCATCGTTCCAGGCCCCGTGC	93	62	259	1145	1103	2604	2641	7907
TGTGTGTAGGGCCGAACTCATCGTTCCAGGCCCCGTGC	451	57	242	3257	404	1110	801	6322
GGTGTCGTAGGGCCGAACTCATCTTCCAGGCCCCGTGC	84	48	166	544	882	2312	2238	6274
GGGTGTCGTAGGGCCGAACTCATCGTTCCCAGGCCCCGTGC	125	91	328	825	970	1739	2125	6203
GGTGTCGTAGGGCCGAACTCATCGTTCCAGGCCCCGTGTC	54	23	117	965	797	2469	1729	6154
GAGAGTCGTAGGGCCGAACTCATCGTTCCAGGCCCCGTGC	183	24	185	1649	879	1390	1433	5743
GATGTGCGTAGGGCCGAACTCATCGTTCCAGGCCCCGTGC	224	69	350	1989	1042	1184	491	5349
TGATGTTGTAGGGCCGAACTCATCGTTCCAGGCCCCGTGC	827	84	309	3046	189	424	288	5167
TGAGTTGTAGGGCCGAACTCATTGTTCCAGGCCCCGTGC	1308	176	426	1650	333	303	433	4629
GTGAGTCGTAGGGCCGAACTCATCGTTCCAGGCCCGTGC	27	6	36	564	421	1528	1457	4039
AGTGTTGTAGGGCCGAACTCATCGTTCCAGGCCCTGTGC	2295	367	343	698	115	60	33	3911
GGGTGTCGTAGGGGCCGAACTCATCGTTCCAGGCCCCGTGC	74	52	146	568	646	1065	1163	3714
GGTGTCGTAGGGACCGAACTCATCGTTCCAGGCCCCGTGC	62	42	133	431	583	1201	1245	3697
GGTGTCTAGGGCCGAACTCATCGTTCCAGGCCCCGTGC	64	41	156	921	299	1008	1197	3686
GGGAGTTGTAGGGCCGAACTCATCGTTCCAGGCCCCGTGC	130	59	164	549	505	852	1168	3427
GGTGTCGTAGGGCCGAACTCATCGTTCCAGGCCCCGTC	26	6	42	382	599	1175	1186	3416
TGAGTTGTAGGGCCGAACACATCGTTCCAGGCCCCGTGC	525	94	236	1158	410	405	541	3369
GGTCGTCGTAGGGCCGAACTCATCGTTCCAGGCCCCGTGC	87	41	122	535	477	1069	934	3265
GGTGTCGTAGGGCCGAACTCATCGTTCCAGGCCCCGTA	37	13	66	516	417	1440	712	3201
AGTGTTTGTAGGGCCGAACTCATCGTTCCAGGCCCCGTGC	1573	320	415	613	176	29	22	3148
TGAGTTGTGGGGCCGAACTCATCGTTCCAGGCCCCGTGC	680	158	274	1119	259	227	307	3024
GGGTGTCGTAGGGCCGAACTCATCGTTCCAGGCCCCGTGCC	60	46	204	572	634	562	892	2970
AGTGTTGTAGGGCCGAACTCATCGTTCCAGGCCCCGCCC	2485	46	71	174	16	7	11	2810
CGAGTTGTAGGGCCGAACTCATCGTTCCAGGCCCCGTGC	1044	130	162	650	238	211	248	2683
AGAGTGTAGGGCCGAACTCATCGTTCCAGGCCCCGTGC	352	70	223	1123	222	445	235	2670
GGGTGTCGTAGGGCCGAACCCATCGTTCCAGGCCCCGTGC	69	49	208	830	284	404	775	2619
TGAGTTGTAGGGCCGAACTCATCGTTCCAGGCCCCTTGC	328	113	254	951	290	285	339	2560
AGAGTTGTAGGGCCGAACTCATCGTTCCAGGCCCCCGTGC	716	114	335	926	151	113	182	2537
AGAGTTGTAGGCCGAACTCATCGTTCCAGGCCCCGTGC	597	97	229	981	147	189	151	2391
TAAGTTGTAGGGCCGAACTCATCGTTCCAGGCCCCGTGC	233	57	162	702	217	427	559	2357
GGTGTCGTAGGGCCGAACTCATCGTTCCAGGCCCCCGTGCC	44	31	118	404	354	539	781	2271
GGTTGTCGTAGGGCCGAACTCATCGTTCCAGGCCCCGTGC	39	28	67	270	312	804	729	2249
GGTGTGCGTAGGGCCGAACTCATCGTTCCAGGCCCCGTGC	39	33	93	596	252	620	589	2222
GGTGTCGTAGGGCCGACTCATCGTTCCAGGCCCCGTGC	36	18	58	284	201	694	708	1999
GGTGTCGTAGGGCCGAACTCATCGTTCCAGGCCCCGGCG	2	1	29	277	197	908	534	1948
GGGTGTCGTAGGGCCGAACTCATCGTTCCAGGCCCCATGC	92	48	176	528	439	292	370	1945
GATGAGTCGTAGGGCCGAACTCATCGTTCCAGGCCCCGTGC	43	2	31	427	190	871	343	1907
TGAGTTGTCGGGCCGAACTCATCGTTCCAGGCCCCGTGC	460	84	152	659	139	142	178	1814
GGGTGTCGTAGGGCCGAACTCATCGTTCCAGGCCCCGTAC	169	78	228	515	401	167	247	1805
GGTGTCGTAGGGCCGAACTCATCGTTCCAGGCCCCGGTCG	6	4	13	168	196	823	583	1793
AGTGTTGTAGGGCCGGAACTCATCGTTCCAGGCCCCGTGC	787	200	260	339	111	25	15	1737
TGAGTTGTAGGGCCGAACTCATCGTTCCCAGGCCCCCGTGC	106	46	149	342	305	171	587	1706
GGTGTCGTAGGGCCGAACTCCATCGTTCCAGGCCCCGTGC	28	20	50	239	229	569	558	1693
AGTGTGTAGGGCCGAAACTCATCGTTCCAGGCCCCGTGC	563	178	213	570	63	51	20	1658
TGAGTTGCAGGGCCGAACTCATCGTTCCAGGCCCCGTGC	532	81	125	454	118	137	200	1647
AGTGTGTAGGGCCGAACTCATCGTTCCAGGCCCCCGTGC	555	133	235	562	71	48	23	1627
AGTGTTGTAGGGCCGAACTCATCGTTCCAGGCCCCAGTGC	742	139	174	296	191	24	14	1580
TGAGTTGTAGGGCCGAACTCATCGTTCCAGGCCCCGTGA	33	10	39	889	157	203	170	1501
GAGTGTGTAGGGCCGAACTCATCGTTCCAGGCCCCGTACG	223	40	96	782	117	181	49	1488
TGAGTGGTAGGGCCGAACTCATCGTTCCAGGCCCCGTGC	203	59	116	471	158	192	236	1435
GGTGTCGTAGGGCCGAACTCATCGTTACCAGGCCCCGTGC	30	17	50	234	168	429	502	1430
GGGTGTCGTAGGGCCGAACTCATCGTTCCAGGCCCCCGTGCC	39	18	80	281	269	275	455	1417
AGTGTTGTAGGGCCGAACTCATCGTTCCAGGCCCGTGT	832	93	94	292	64	12	2	1389
GTGATGTCGTAGGGCCGAACTCATCGTTCCAGGCCCCGTG	28	3	13	294	172	524	335	1369
AGTGTTGTAGGGCCGAACTCATCGTTCCAGGCCCCCTGC	616	138	187	350	56	14	5	1366
GGTGTCGTAGGACGCGAACTCATCGTTCCAGGCCCCGTGC	11	10	26	161	150	549	453	1360
AGTGTTGTAGGGCCGAAGCTCATCGTTCCAGGCCCCGTGC	618	146	194	321	53	21	5	1358
GTGTCGTAGGGCCGAACTCATCGTTCCAGGCCCCCGTGC	29	14	53	277	157	383	410	1323
GTGTGTTGTAGGGCCGAACTCATCGTTCCAGGCCCCGTGC	144	15	71	804	77	129	77	1317
AGTGTTGTAGGGCCGAACTCATCGTTCCAGGCCCCGTGA	139	42	101	905	76	33	4	1300
GGTGTTCGTAGGGCCGAACTCATCGTTCCAGGCCCCGTGC	19	21	56	164	196	416	424	1296
TGAGTTGTAGGGCGAACTCATCGTTCCAGGCCCCGTGC	115	17	83	356	181	166	377	1295
AGTGTTGTAGGGCCGAACTCATTCGTTCCAGGCCCCGTGC	569	118	127	351	31	11	16	1223
GAGTGTGTAGGGCCGAACTCATCGTTCCAGGCCCCGTG	260	13	53	557	123	158	29	1193
GGGTGTCGTAGGGCCGAACTCATCGTCCAGGCCCCGTGC	30	10	36	181	165	400	352	1174
GGGGTGTCGTAGGGCCGAACTCATCGTTCCAGGCCCCGTGC	23	10	52	209	193	328	359	1174
AGTGTTGAGGGCCGAACTCATCGTTCCAGGCCCCGTGC	625	108	144	222	44	12	7	1162
GAGTGTGTAGGGCCGAACTCATCGTTCCAGGCCCCGTGT	224	17	35	620	161	77	18	1152
GGTGTCGTAGGGCCGAACTCATCGTTCCAGGCCCCGCG	6	1	8	141	135	545	298	1134
TGAGTCTAGGGCCGAACTCATCGTTCCAGGCCCCGTGC	363	49	108	338	103	103	67	1131
AGTGTTGTAGGACCGAACTCATCGTTCCAGGCCCCGTGC	558	136	123	217	27	28	14	1103
GTAGTGTAGGGCCGAACTCATCGTTCCAGGCCCCGTGC	15	0	8	206	97	400	373	1099
TGAGTTGTAGGGCCGAACTCATCATTCCAGGCCCCGTGC	65	19	62	366	115	187	229	1043
GGTGTCGTAGGGCCGAACTCATCGTTCCAGGCCCGGTG	322	82	122	265	92	107	46	1036
GGGTGTCGTAGGGCTGAACTCATCGTTCCAGGCCCCGTGC	55	17	63	205	190	184	314	1028
GGGTGTCGTAGGGCCGAACTTATCGTTCCAGGCCCCGTGC	77	40	48	203	262	140	215	985
TGAGTTGTAGGGGCCGAACTCATCGTTCCAGGCCCCGTGC	70	20	64	352	120	118	240	984
GGGTGTCGTAGGGCCGAACTCATTGTTCCAGGCCCCGTGC	424	45	53	185	125	61	87	980
GGAGTGTCGTAGGGCCGAACTCATCGTTCCAGGCCCCGTGC	77	26	90	466	126	103	87	975
TGAGTTGTAGGGCCGAACTCATCGTTCCAGGCCCCAGTGC	75	30	54	225	177	129	261	951
GGACCTATGCAGTAGCCAGTGTGGACTGGGCTGCCCCC	939	3	0	4	0	0	0	946
TGAGTTGTAGGGCCGAACTCATCGTTCCAGGCCCCCTGC	52	20	48	399	141	106	174	940
GTGAGTGTAGGGCCGAACTCATCGTTCCAGGCCCCGTGCC	7	1	10	207	82	273	325	905
GTGATGTCGTAGGGCCGAACTCATCGTTCCAGGCCCCCGTGC	10	1	12	186	61	329	305	904
AGTGTTGTGGGCCGAACTCATCGTTCCAGGCCCCGTGC	301	35	81	393	27	22	15	874
GGGTGTCCGTAGGGCCGAACTCATCGTTCCAGGCCCCGTGC	22	11	44	130	188	215	261	871
AGTGTCGTAGGGCCGAACTCATCGTTCCAGGCCCCGTG	403	62	100	217	45	23	17	867
TGAGTAGTAGGGCCGAACTCATCGTTCCAGGCCCCGTGC	119	50	91	278	77	134	117	866
AGTGTTAGTAGGGCCGAACTCATCGTTCCAGGCCCCGTGC	375	87	101	208	27	10	7	815
GTGAGTGTAAGGGCCGAACTCATCGTTCCAGGCCCCGTGC	8	3	10	133	60	254	333	801
AGTGTTGTAGGGCCGAACTCATCGTTCCAGGCCCCGGGC	234	88	118	291	38	5	20	794
AGTGTTGTAGGCCGAACTCATCGTTCCAGGCCCCGTGT	460	60	59	174	25	7	3	788
GAGTGTCGTAGGGCCGAAACTCATCGTTCCAGGCCCCGTGC	92	15	57	355	100	109	59	787
AGTGTTGTAGGCCGAACTCATCGTTCCAGGCCCCGTAC	319	95	170	169	22	7	1	783
AGAGTTGTAGGGCCGAAACTCATCGTTCCAGGCCCCGTGC	212	35	64	259	64	60	79	773
AGTGTTGTAGGGCCGAACTCATCGTTCCAGGCCCCTGTGC	367	70	114	167	27	12	3	760
GAGTGTCGTAGGGCCGAACTCATCGTTCCAGGCCCCGTACG	120	18	90	361	75	49	33	746
AGAGTTGTAGGGCCGAACTCATCGTTCCAGGCCCGTGC	204	35	58	250	58	72	55	732
TGAGTTGTAGGGCCGAACTCATCGTTCCAGGTCCCGTGC	73	13	56	227	61	98	202	730
GGGTGTCGTAGGGCCGAATCATCGTTCCAGGCCCCGTGC	15	7	33	173	76	165	241	710
TGAGTTGTAGGGCCGAACTCATCGTTCCAGGCCCCGCCC	287	12	26	178	52	59	82	696
AGTGTTGTAGGCCGAACTCATCGTTCCAGGCCCCATGC	361	66	113	133	11	3	2	689
GAGTGTTGTAGGGCCGAAACTCATCGTTCCAGGCCCCGTGC	275	69	86	186	34	25	12	687
TGAGTTGTAGGGCCGAACTCATCGTTCCAGGCCCCGGGC	13	18	26	304	99	94	108	662
GGTGTTGTAGGGCCGAACTCATCGTTCCAGGCCCCGTG	110	41	76	244	55	73	31	630
GAGTGTCGTAGGGCCGAACTCATCGTTCCAGGCCCCATGC	89	23	66	244	93	67	40	622
TGAGTTGTAGGGCCGGAACTCATCGTTCCAGGCCCCGTGC	45	15	39	163	88	98	169	617
AGTGTTGTAGGGCCGAACTTCATCGTTCCAGGCCCCGTGC	284	49	89	140	25	8	7	602
GGTGTCGTAGGGCCGAACCTCATCGTTCCCAGGCCCCGTGC	10	15	33	69	97	171	198	593
AGTTCGTAGGGCCGAACTCATCGTTCCAGGCCCCGTGC	157	32	70	174	71	40	47	591
GAGTCGTAGGGCCGAACTCATCGTTCCAGGCCCCCGTGC	32	12	52	274	60	95	60	585
GGTGTCGTAGGGCCGAAACTCATCGTTCCAGGCCCCGTG	13	9	16	68	102	199	173	580
TGAGTTGTAGGGCCGAACTCATCGTTCCAGGCCCCGTGGC	56	14	48	192	41	68	152	571
TGAGTTGTAGGGCCGAATTCATCGTTCCAGGCCCCGTGC	47	13	18	183	67	88	153	569
GGTGTCGTAGGGCCGAACCCATCGTTCCCAGGCCCCGTGC	1	0	8	17	436	40	45	547
GGTGTCGTAGGGCCGAAACTCATCGTTGCCAGGCCCCGTGC	14	64	14	57	89	150	147	535
AGTTGTTGTAGGGCCGAACTCATCGTTCCAGGCCCCGTGC	278	47	79	105	8	11	7	535
AGTGTTGTAGGGCTGAACTCATCGTTCCAGGCCCCGTGC	301	64	49	98	9	4	4	529
TGAGTGTAGGGCTGAACTCATCGTTCCAGGCCCCGTGC	40	9	30	166	46	88	148	527
TGAATTGTAGGGCCGAACTCATCGTTCCAGGCCCCGTGC	90	20	34	136	36	88	108	512
GGTGCGTAGGGCCGAACTCATCGTTCCAAGGCCCCGTGC	8	5	14	62	87	165	166	507
GTGTCGTAGGGCCGAACTCATCGTTCCAGGCCCCGTCG	9	4	7	137	41	188	120	506
GAAGTTGTAGGGCCGAACTCATCGTTCCAGGCCCCGTGC	166	29	54	128	49	45	31	502
TGAGTTGTTAGGGCCGAACTCATCGTTCCAGGCCCCGTGC	91	14	17	148	60	74	87	491
GGGTGTCGTAGGGCCGAACTCATCGTTCCAGGCCCCTTGC	18	16	50	142	109	47	103	485
GGGTGTCGTAGGGCCGAACACATCGTTCCAGGCCCCGTGC	18	12	39	120	84	114	97	484
GGGTGTTGTAGGGCCGGAACTCATCGTTCCAGGCCCCGTGC	28	35	60	134	54	104	65	480
AGTGTTGTAGGGCCGAACTCATCGTTCCAGGCCCAGTGC	280	31	35	103	15	11	5	480
AGTGTTGTAGGGCCGAACTCATCGTTCCAGGCCCCGAGC	106	55	76	199	29	4	10	479
TAGTTGTAGGGCCGAACTCATCGTTCCAGGCCCCGTGC	26	8	21	187	47	70	119	478
AGTGTTGTAGGGCCGAACTCATCGTTCCAGGCCGGTGC	406	30	14	19	3	0	0	472
TGAGTTGTAGGGCCGAACTCATCGGTTCCAGGCCCCGTGC	32	15	35	116	89	55	123	465
TCGAGTTGTAGGGCCGAACTCATCGTTCCAGGCCCCGTGC	58	6	29	155	51	55	109	463
GGGTGTCGTAGGGCCGAACTCATCGTTCCAGGCCCCGTACG	6	2	21	108	86	104	124	451
GGTGTCGTAGGGCCGAACTCATCGTTCCAGGCCCCGTACCG	13	4	14	49	93	163	104	440
AGTGTTGTAGGGCCGAACCCCATCGTTCCAGGCCCCGTGC	157	61	88	114	13	0	6	439
TGAGTTGTAGGGCCGAACTCATCGTTCCAGGCCCCGTGG	67	4	10	104	46	61	145	437
GGGTGTCGTAGGGCCGAACTCATCGTTCCAGGCCCTGTGC	26	9	33	93	98	80	95	434
TTGAGTTGTAGGGCCGAACTCATCGTTCCAGGCCCCGTGC	32	14	30	110	50	55	138	429
GTGAGTGTAGGGCCGAACTCATCGTTCCAGGCCCCGTGTC	13	4	5	114	54	123	109	422
AGTGTTGTAGGGCCGAACTCATCGTTCCAGGCCCCTGC	288	34	31	59	6	3	1	422
GATGTGTGTAGGGCCGAACTCATCGTTCCCAGGCCCCGTGC	35	12	34	181	70	53	32	417
GAGTGTAGTAGGGCCGAACTCATCGTTCCAGGCCCCGTGC	34	7	41	189	43	69	23	406
GGGTGTCGTAGGGCCGAACTCATCGTTTCCAGGCCCCGTGC	7	3	18	65	81	71	160	405
ACTGTGTAGGGCCGAACTCATCGTTCCAGGCCCCGTGC	194	43	32	91	17	22	2	401
AGTGTGTAGGGCCGAACTCATCGTTCCAGGCCCCGTGT	160	16	22	147	19	10	4	378
GGGTGTCGTAGGGCCGAACTCATCGTTCCAGCCCCGTGC	10	5	14	40	73	110	121	373
GGTGTCGTAGGGCCGAACTCATCGTTCCAGGCCCGTAGC	3	5	11	69	51	105	128	372
AGTTTGTAGGGCCGAACTCATCGTTCCAGGCCCCGTGC	235	16	34	63	13	3	7	371
GAGTGTCGTAGGGCCAACTCATCGTTCCAGGCCCCGTGC	34	11	21	193	31	58	21	369
GGTGTCGTAGGGGCCGAACTCATCGTTCCAGGCCCCCGTGC	4	4	11	57	42	91	154	363
GGATGTCGTAGGGCCGAAACTCATCGTTCCAGGCCCCGTGC	12	4	19	58	46	129	94	362
GGGTGTCGTAGGGCCGGAACTCATCGTTCCAGGCCCCGTGC	2	5	12	65	77	70	129	360
GAGTGTGGTAGGGCCGAACTCATCGTTCCAGGCCCCGTGC	34	14	36	117	51	66	33	351
GGTGGTCGTAGGGCCGAACTCATCGTTCCAGGCCCCCGTGC	7	4	19	57	40	111	112	350
AGTGTTGTAGGGCCGAACATCATCGTTCCAGGCCCCGTGC	155	26	49	104	10	1	4	349
AGTGTTGTAGGGCCGAACTCATCGTTCCAGGCCCGTAC	145	45	42	96	14	1	2	345
GGGTGCCGTAGGGCCGAACTCATCGTTCCAGGCCCCGTGC	12	5	17	75	68	52	114	343
GTGTCGTAGGGCCGAACTCATCGTTCCAGGCCCCGTGT	19	11	9	90	84	72	52	337
GGGTGTCGTAGGGCCGAACTCATCGTTCCCAGGCCCGTGC	4	4	10	62	60	89	107	336
AGTGTTGTAGGGCCGAACCTCATCGTTCCAGGCCCCGTGC	158	35	39	84	12	5	2	335
GGGGGTCGTAGGGCCGAACTCATCGTTCCAGGCCCCGTGC	0	1	17	59	61	81	113	332
AGAGTTGTAGGGCCGAACTCATCGTTCCAGGCCCCGTGCC	81	14	25	150	18	15	28	331
GGGTGTCGTAGGGCCGAACTCATCGTTCCAGGCCCCGTCC	10	1	21	69	92	39	96	328
GTCGAGTGTAGGGCCGAACTCATCGTTCCAGGCCCCGTGC	22	1	7	70	50	85	93	328
TGAGTTGTAGGCCGGAACTCATCGTTCCAGGCCCCGTGC	35	10	19	105	37	44	78	328
GGGTGTCGTAGGGCCGAAACTCATCGTTCCCAGGCCCCGTGC	4	6	17	36	47	95	121	326
GTGAGTCGTAGGGCCGAAACTCATCGTTCCAGGCCCCGTGC	3	0	2	51	18	148	104	326
AGTGTCGTAGGGCCGAATCATCGTTCCAGGCCCCGTGC	100	14	46	93	35	15	21	324
GGTGTCCCGTAGGGCCGAACTCATCGTTCCAGGCCCCGTGC	9	6	12	54	44	100	91	316
GTGTCGTAGGGCCGAACTCATCGTTCCAAGGCCCCGTGC	6	2	8	33	33	95	135	312
ATGAGTCGTAGGGCCGAACTCATCGTTCCAGGCCCCGTGC	11	4	3	112	28	105	48	311
AGTGTTGTAGGGCCGAACTCATCGTTCCAGGCCCCGTA	138	22	35	102	7	5	2	311
GAGTGTCGTAGGGCCGAACTCATTGTTCCAGGCCCCGTGC	145	6	26	97	17	14	2	307
TGAGTTGAAGGGCCGAACTCATCGTTCCAGGCCCCGTGC	94	20	23	83	25	25	36	306
GAGTGTCGTAGGGCCGAACTCATCGTTCCAGGCCCCGTCG	37	7	34	138	31	37	21	305
AGTGTTGTAGGGCCCGAAACTCATCGTTCCAGGCCCCGTGC	136	22	39	91	6	5	5	304
GGGGGTGTCGTAGGGCCGAACTCATCGTTCCAGGCCCCGTGC	2	2	16	50	48	96	90	304
GGTGTCGGTAGGCCGAACTCATCGTTCCAGGCCCCGTGC	4	3	11	28	53	100	105	304
AGGGATGTAGGGCCGAACTCATCGTTCCAGGCCCCGTGC	209	53	18	15	0	0	0	295
GTGATGTCGTAGGGCCGAACTCATCGTTCCAGGCCCCGTCCG	3	0	0	28	21	121	122	295
GATGTCGTAGGGCCGAACTCATCGTTCCAGGCCCCGTG	15	5	17	81	43	83	51	295
GTGATGTGGTAGGGCCGAACTCATCGTTCCAGGCCCCGTGC	2	0	0	35	26	117	114	294
GTGAGTCGTGGGCCGAACTCATCGTTCCAGGCCCCGTGC	11	1	4	79	46	83	70	294
GTGAGTGTAGGGCCGAATCATCGTTCCAGGCCCCGTGC	1	0	1	53	18	98	121	292
GGGTTGTCGTAGGGCCGAACTCATCGTTCCAGGCCCCGTGC	7	3	13	38	61	70	98	290
GGTGTCGTAGGGCCGAACTCATCGTTCCAGGCCCCCTG	14	7	30	76	46	67	48	288
GAGTGTCGTAGGGCCGAACTCATCGTTCCAGGCCCCGTGCC	31	8	25	135	39	24	22	284
GGGTGTCGTTAGGGCCGAACTCATCGTTCCAGGCCCCGTGC	6	2	8	34	52	58	124	284
AGTGTCGTAGGGCCAACTCATCGTTCCAGGCCCCGTGC	60	19	45	92	20	22	22	280
GTGTCGTAGGGCCGAACTCATCGTTCCCAGGCCCGTGC	2	1	7	59	19	96	96	280
GGGTGTCGTAGGGCCGAACTCATCGTTCCAGGCCCCGTAGC	9	2	15	38	41	50	125	280
AGTGTTTGTAGGGCCGAACTCATCGTTCCAGGCCCCCGTGC	139	25	44	52	16	2	1	279
AGTGTGTAGGGCCGAACTCATCGTTCCAGGCCCCATGC	79	23	30	119	14	11	3	279
GGGTGTGGTAGGGCCGAACTCATCGTTCCAGGCCCCGTGC	0	6	12	46	55	64	91	274
GTGTGTCGTAGGGCCGAACTCATCGTTCCAGGCCCCGTACG	16	2	9	135	11	62	37	272
GGGTGTCGTAGGGCCGAACTCATCGTTCCAGGCCCGGTGC	57	25	24	71	31	24	35	267
GGGTGTCCTAGGGCCGAACTCATCGTTCCAGGCCCCGTGC	1	1	9	57	83	60	56	267
GGGTGTTGTAGGGCCGAACTCATCGTTCCAGGCCCCGCTGC	24	14	32	70	42	47	36	265
AGTGTTGTAGGCGCAACTCATCGTTCCAGGCCCCGTGC	119	28	43	66	3	1	3	263
GGTGTCGTAGGGCCGAACCTCTTCCATGCCCGGCCGCG	0	2	6	30	7	96	121	262
GTATGTCGTAGGGCCGAACTCATCGTTCCAGGCCCCGTGC	12	0	7	44	22	101	75	261
GTGAGTTGTAGGGCCCGAACTCATCGTTCCAGGCCCCGTGC	9	9	12	71	28	47	84	260
TGAGTGTAAGGGCCGAACTCATCGTTCCAGGCCCCGTGC	7	4	12	83	22	55	76	259
GGTGTCGTAGGGCCGAACTCATCGTTCCAGGCCCCCGGTGC	3	2	8	39	38	54	115	259
GTGAGTGGTAGGGCCGAACTCATCGTTCCAGGCCCCGTGC	3	8	4	48	27	75	93	258
GGTGTCGTAGGGCCGAACTCATCGTCCAGGCCCCGTGCC	9	3	7	46	37	81	73	256
GGAGTGTGTAGGGCCGAACTCATCGTTCCAGGCCCCGTGC	18	4	14	120	39	46	14	255
GGATGCGTAGGGCCGAACTCATCGTTCCAGGCCCCGTGC	42	10	22	38	44	58	40	254
GGGAGTTGTAGGGCCGAACTCATCGTTCCAGGCCCCCGTGC	23	4	10	35	32	67	83	254
GTGTCGTAGGGCCGAACTCATCGTTCCAGGCCCCAGTGC	0	3	14	45	25	81	86	254
AGTGTGTAGGGCCGAACTTATCGTTCCAGGCCCCGTGC	135	33	16	47	7	8	7	253
GTGAGTAGTAGGGCCGAACTCATCGTTCCAGGCCCCGTGC	4	1	3	53	25	84	82	252
GTGTCGTAGGGCCGAACTCATCGTTGCCAGGCCCCGTGC	3	13	12	39	24	81	78	250
GTGTGTGTAGGGCCGAACTCATCGTTCCAGGCCCCGTGCC	8	2	10	90	18	53	69	250
GGGTGGTCGTAGGGCCGAACTCATCGTTCCAGGCCCCGTGC	6	2	10	35	30	93	73	249
AGTGTTGTAGGGCCGAACTCCATCGTTCCAGGCCCCGTGC	118	19	32	64	7	3	4	247
GAGTGTCGTAGGGCCGAACACATCGTTCCAGGCCCCGTGC	35	4	16	109	37	31	14	246
GTGTGTGGTAGGGCCGAACTCATCGTTCCCAGGCCCCGTGC	7	4	7	71	26	55	75	245
GTGTGTCGGTAGGGCCGAACTCATCGTTCCAGGCCCCGTGC	2	1	6	56	38	72	67	242
GGTGGTCGTAGGCCGAACTCATCGTTCCAGGCCCCGTGC	9	4	7	31	31	81	78	241
GAGTGTGTAGGGCCGAACTCATCGTTCCAGGCCCCTGCG	26	2	14	132	25	32	10	241
GGTCTGCGTAGGGCCGAACTCATCGTTCCAGGCCCCGTGC	1	1	9	41	46	91	50	239
AGAGTTGTAGGGCCGAACACATCGTTCCAGGCCCCGTGC	91	16	12	77	15	10	14	235
TGAGTGTAGGGCCGAACTCATCGTTCCAGGCCCCGTGT	28	1	15	78	33	45	35	235
GTGATGTGTAAGGGCCGAACTCATCGTTCCAGGCCCCGTGC	1	0	4	31	16	86	94	232
TGACTTGTAGGGCCGAACTCATCGTTCCAGGCCCCGTGC	2	0	6	155	34	16	19	232
GGGTGTCGTAGGGCCGAACTCATCGTTCCAGGCCTCGTGC	2	1	8	47	31	61	77	227
GGAGTTGTAGGGCCGAACCCATCGTTCCAGGCCCCGTGC	3	0	12	51	21	84	54	225
AGTGTTTAGGGCCGAACTCATCGTTCCAGGCCCCGTGC	131	18	24	40	6	1	4	224
GGTGTCGTAGGGCCGAACTCATCGTTCCAGGCCCCGCC	34	3	6	34	32	66	43	218
GGGTGTCGTAGGGCCAAACTCATCGTTCCAGGCCCCGTGC	8	3	8	29	34	53	82	217
AGTGTGTAGGGCCGAAGCTCATCGTTCCAGGCCCCGTGC	81	32	25	59	10	6	2	215
GATGTGTGTAGGGCCGAACTCATCGTTCCAGGCCCCCGTGC	19	3	16	86	24	48	16	212
GGTGTCGTAGGGCCGAACCCATCGTTCCAGGCCCCGTG	6	5	9	39	31	45	75	210
GTGTGTCGTAGGGCCGAAACTCATCGTTCCAGGCCCCGTGC	10	0	5	66	10	81	38	210
GTGATGTCGTAGGGCCGAACTCATTCGTTCCAGGCCCCGTGC	18	3	6	46	9	63	65	210
GAGTGTGTAGGGCCGAACTCATCGTTCCAGGCCCCGTAC	26	8	31	110	19	12	2	208
GGGTGTCGTAGGGCCGAACTCATCGTTCCAGGCCCCGCGC	13	5	10	64	54	30	32	208
GGTGTCGTAGGCCGAACTCATCGTTGCCAGGCCCGTGC	3	10	9	25	38	53	69	207
GAGTGTGTAGGGCCGAACTCATCGTTCCAGGCCCCAGTGC	32	6	18	90	24	31	4	205
GTGAGTCGTAGGGCCGAACTCATCGTTCCAGGCCCCCGTGC	1	0	1	57	13	70	62	204
GAGTGTCGTAGGGCCGAACTCATCGTTCCAGGCCCCGTCCG	45	0	10	69	38	28	13	203
GGTGTCGTAGGGCCGAACTCATCGTTCCAGGCCCCTGTGCC	1	2	8	27	37	70	57	202
GTGTCGTAGGGCCGAACTCATCGTTCCAGGCCCCGTAGC	2	2	6	35	36	52	69	202
TGAGTTGTAGGGCCGAACATCATCGTTCCAGGCCCCGTGC	16	3	7	88	27	20	40	201
GAGTCTGGTACGGCAACTCATCGTTCCAGGCCCCGTGC	26	1	7	119	14	22	11	200
TGAGTTGTAGGGCCGAACTCATGGTTCCAGGCCCCGTGC	10	2	18	67	21	39	43	200
GAGTGTCGTAGGGCCGAACTCATCGTTCCAGGCCCGGTGC	102	13	15	57	5	5	2	199
GGGTGTTGTAGGGCCGAAACTCATCGTTCCAGGCCCCGTGC	34	4	23	59	44	20	15	199
GAGTGTTGTAGGGCCCGAACTCATCGTTCCAGGCCCCGTGC	67	24	15	72	8	6	6	198
GTGTGTCGTAGGGCCGAACTCATTCGTTCCAGGCCCCGTGC	75	2	6	66	9	19	20	197
GGTGTCGTAGGGCCGAACTCATCGTTGCCAGGCCCCGTG	3	8	5	18	32	65	64	195
GAGTGTTGTCGGGCCGAACTCATCGTTCCAGGCCCCGTGC	32	11	23	89	6	18	15	194
GGTGTCGTAGGGCCGAATCATCGTTGCCAGGCCCCGTGC	3	3	12	22	27	48	79	194
AGTGTTGTAGGGCCGAAACTCATCGTTCCAGGCCCCGTGT	125	11	8	43	3	3	0	193
AGTGTGTAGGGCCGAACTCATTGTTCCAGGCCCCGTGC	84	23	22	49	5	8	1	192
GGGTATCGTAGGGCCGAACTCATCGTTCCAGGCCCCGTGC	11	1	6	37	37	49	51	192
AGAGTTGTAGGGCCGAACTCATTGTTCCAGGCCCCGTGC	82	8	19	65	12	2	3	191
GCGTGTCGTAGGGCCGAACTCATCGTTCCAGGCCCCGTGC	54	2	7	53	19	31	25	191
GAGTGTTGTAGGGCCGAACTCATCGTTCCAGGCCCGTGC	56	16	28	66	14	5	5	190
AGTGTTGTAGGGCCGAACTCATCGTTCCAGGCCCCCATGC	87	18	27	50	3	3	0	188
GTGAGTGTAGGGCCGAACTCATCGTTCCAGGCCCCGGTCG	0	0	2	30	19	56	81	188
AGTGTGTAGGGCCGAACTCATCGTTCCAGGCCCCGTAC	40	19	39	68	11	6	3	186
TGGGTTGTAGGGCCGAACTCATCGTTCCAGGCCCCGTGC	8	2	27	53	13	29	54	186
GGGTGTCGTAGGGCCGAACTCATCGTTCCAGGCCCCGTCCG	2	1	3	27	33	46	73	185
GGGCGTCGTAGGGCCGAACTCATCGTTCCAGGCCCCGTGC	83	13	7	28	15	15	24	185
AGTGTTGTAGGGCCGAACTCATCGTTCCAGCCACCGTGC	89	9	31	47	3	4	2	185
GTGTGTGTAGGGCCGAACTCATCGTTCCAGGCCCCGTCCG	10	1	2	47	20	40	65	185
GGTGTCGTAGGGCCGAAACTCATCGTTCCAGCCCCGTGC	2	3	7	22	34	57	60	185
TGAGTTGTAGGGCCGAACTCATCGTTCCGGCCCCGTGC	15	6	7	43	26	26	61	184
GGAGTTGTAGGGCCGAACTCATCGTTCCAGGCCCCGTGT	39	1	8	53	35	31	17	184
GATGTGTTCGTAGGGCCGAACTCATCGTTCCAGGCCCCGTGC	39	9	23	77	14	19	2	183
GTGTCGTAGGGCCGAACTCATCGTTCCAGGCCCCGGTGC	2	0	5	29	29	56	60	181
GGTGTCGTAGGCCGAACTCATCGATTCCAGGCCCCGTGC	1	2	7	28	23	54	66	181
GGTGTCGTAGGGCCGAACTCATCGTTCCAGGGGGCCCCGTGC	4	1	12	28	28	62	46	181
GGGTGTCGTAGGACCGAACTCATCGTTCCAGGCCCCGTGC	4	1	8	40	35	32	61	181
GTGTGTGTAGGGGCCGAACTCATCGTTCCAGGCCCCGTGC	6	1	4	76	14	45	35	181
GAGTGTCGTAGGGGCCGAACTCATCGTTCCAGGCCCCGTGC	11	6	18	81	27	25	12	180
TGAGTGTAGGGCCGAACTCATCGTTCCAGGCCCCATGC	6	1	7	60	17	51	35	177
GGTGTCGTAGGGCCGAACTCATCGTTCCCCCAGGCCCCGTGC	5	2	7	20	17	65	61	177
GTGATGTCGTAGGGCCGAACTCATCCGTTCCAGGCCCCGTGC	0	0	4	23	12	64	73	176
GGTGTCGTAGGGCCGAACTCATCGTTCCAGGCCCCCGTAGC	3	4	8	31	22	48	60	176
GATGCGTAGGGCCGAACTCATCGTTCCAGGCCCCGTGT	168	3	2	2	0	0	0	175
GTGATGTGTAGGGCCGAACTCATCGTTCCAGGCCCCGTCGC	2	0	0	30	20	49	72	173
GGTGCGTAGGGCCGAACTCATCGATTCCAGGCCCCGTGC	10	1	9	33	14	60	46	173
GGGTGTCGTGGGGCCGAACTCATCGTTCCAGGCCCCGTGC	0	1	11	49	43	26	41	171
GTGTCGTAGGCCGAACTCATCGTTCCCAGGCCCCGTGC	1	0	9	27	24	41	69	171
GTGAGTGTTAGGGCCGAACTCATCGTTCCAGGCCCCGTGC	2	0	5	30	14	54	66	171
GGGTGTCGTAGGGCCGAACTCATCGTTCTAGGCCCCGTGC	9	4	15	40	40	25	38	171
GTGTGTGGTAGGGCCGAACTCATCGTTCCAGGCCCCGTGC	5	2	3	53	23	45	36	167
AGTGTTGTAGGGCCGAACTCATCGTTCCAGGCCCCGTTC	91	17	15	28	8	0	8	167
GGTGTCGTAGGGCCCCCGAACTCATCGTTCCAGGCCCCGTGC	3	3	8	26	35	53	39	167
GGGTGTCGTAGGGCCGAACTCATCGTTCCAAGCCCCGTGC	0	4	13	34	33	42	41	167
AGTGTTCGTAGGGCCGAACTCATCGTTCCAGGCCCGTGC	78	11	29	38	3	3	2	164
GGATGTCGTAGGGCCGAAGCTCATCGTTCCAGGCCCCGTGC	5	5	10	23	32	41	48	164
GGTGTCGTAAAAGGGCCGAACTCATCGTTCCAGGCCCCGTGC	4	0	3	22	31	50	53	163
GGTGTCGTAGGGCCGAACTCATCGTTCCAGGCCCCTGTCGC	3	3	2	24	18	77	35	162
GGTGTCGTAGGGCCGAACTCATCGTTCCCAGGCCCGTG	2	3	7	18	10	71	50	161
GGGACCTATGCAGTAGCCAGTGTGGACTGGGCTGCCCCCC	159	1	0	0	0	0	0	160
GGTGTCGTAGGGCCGAAACTCATCGTTCCAGGCCCCGTCGC	2	0	3	17	22	54	61	159
GAGTGTCGTAGGGCCGAACTCATCGTTCCAGGCCCCTGCG	15	3	9	86	17	13	15	158
GTGAGTCGTAGGGCCGAACTCATCCGTTCCAGGCCCCGTGC	1	0	1	23	6	64	62	157
GGGTGTCATAGGGCCGAACTCATCGTTCCAGGCCCCGTGC	4	1	2	29	35	37	49	157
GTGGAGTCGTAGGGCCGAACTCATCGTTCCAGGCCCCGTGC	1	0	0	31	7	67	51	157
TGAGTTGTAGGGCCGAACTCATCGTTCCAGGCCCCGGTC	2	0	2	28	16	35	72	155
GGTGCGTAGGGCCGAACTCATCCGTTCCAGGCCCCGTGC	1	0	7	18	25	47	57	155
AGTGTTGTAGGGCCGAACTCATCGTTCCAGGCCCCCTG	63	31	37	23	1	0	0	155
GGTGTCGTAGGGCCGAACTCATATGTCCAGGCCCCGTGC	0	0	0	18	9	69	57	153
GGTGTCGTAGGGCCGAAACTTCATCGTTCCAGGCCCCGTGC	2	2	7	13	14	57	57	152
GGGTGTCGTAAGGCCGAACTCATCGTTCCAGGCCCCGTGC	8	3	6	21	28	37	48	151
GAGTGCGTAGGGCCGAACTCATCGTTCCAGGCCCGTGC	8	1	3	62	28	37	12	151
GGGTGTCGTAGGGTCGAACTCATCGTTCCAGGCCCCGTGC	2	2	4	30	22	33	58	151
AGTGTGTCGGGCCGAACTCATCGTTCCAGGCCCCGTGC	26	8	15	64	11	13	14	151
GGTGTCGTAGGGCCGAACTCATCCGTTGCCAGGCCCCGTGC	3	7	4	10	26	40	60	150
GAGTGTGTAGGGCCGAACTCATCGTTCCAGCCCCGTGC	17	3	12	63	19	30	6	150
TGAGTGTAGGGCCGAACTCATCGTTCCAAGGCCCCGTGC	3	2	7	49	11	29	48	149
GGGTGTCGTAGGGCCGAACTCATCGTTCCAGGCCCCCTGC	12	4	7	41	42	15	28	149
GTGTCGTAGGGCCGAACTCAATCGTTCCAGGCCCCGTGC	2	1	8	16	22	52	47	148
GGGTGTCGTAGGGCCGAACTCATCATTCCAGGCCCCGTGC	4	2	11	35	23	28	45	148
GAGTGCTGTAGGGCCGAACTCATCGTTCCAGGCCCCGTGC	72	23	21	22	9	1	0	148
GGGTGTCGCTAGGGCCGAACTCATCGTTCCAGGCCCCGTGC	4	4	14	32	18	28	47	147
GGTGTCGTAGGGCCGAACTCATCGTTCCAGGCCCCATG	25	3	3	21	11	53	31	147
ATGAGTTGTAGGGCCGAACTCATCGTTCCCAGGCCCCGTGC	19	3	11	49	19	11	33	145
GTGAGTTGTAGGGGCCGAACTCATCGTTCCAGGCCCCGTGC	9	4	8	31	11	30	52	145
GAGTGTGTTAGGGCCGAACTCATCGTTCCAGGCCCCGTGC	20	3	11	60	16	32	3	145
GGCTGCGTAGGGCCGAACTCATCGTTCCAGGCCCCGTGC	0	0	0	23	30	73	18	144
AGTGTTGTAGGCCGAACTCATCGTTCCAGGCCCCGTGA	17	4	15	104	2	1	0	143
GTGAGTCGTAGGGCCGAACTCATCGTTCCAGCCCCGTGC	1	0	0	28	13	56	45	143
AGTGTTGTAGGGCCGAACCCATCGTTCCAGGCCCCGTAC	68	10	19	40	3	2	0	142
GGTGTCGTAGGGCCGAATCATCGTTCCAAGGCCCCGTGC	1	1	3	27	10	28	71	141
AGAGTTGTAGGGCCCGAACTCATCGTTCCAGGCCCCGTGC	27	3	17	52	5	16	20	140
GGGTGTCGTAGGGCCGAACTCACCGTTCCAGGCCCCGTGC	5	2	7	38	34	18	36	140
GACGTGTGTAGGGCCGAACTCATCGTTCCAGGCCCCGTGC	90	2	5	25	10	5	2	139
AGTGTTGTAGGCCGAACTCATCGTTCCAGGCCCCGCGC	88	7	11	31	0	1	0	138
GTGTGTCGTAGGGCCGAACTCATCGTTCCAGGCCCCATGC	14	1	6	48	15	32	22	138
GTGATGTCGTAGGGCCGAACTCATCGTTCCAGGCCCTCGTGC	0	0	1	23	13	57	44	138
GGGTGTCGTAGGGCCGAACTCATCGTTCCAGGCCCCTGCG	1	0	4	25	23	45	39	137
AGTGTTGTAGGGCCGAACTCATTGTTCCAGGCCCCGTGT	98	16	5	17	1	0	0	137
GTGTCGTAGGGCCGAACTCATCGTTGCCAGGCCCGTGC	1	11	6	16	24	43	35	136
AGTGTTGTAGGGCCGAAACTCATCGTTCCAGGCCCCGTG	83	7	13	22	7	2	2	136
GGTGTTGTAGGGCCGAACTCATCGTTCCAGGCCCCCGTGCC	19	2	11	22	45	21	16	136
AGAGTTGTGGGGCCGAACTCATCGTTCCAGGCCCCGTGC	55	10	12	40	6	11	2	136
GGTTTTGTCGTAGGGCCGAACTCATCGTTCCAGGCCCCGTGC	3	2	5	22	19	52	32	135
AGTGTCTAGGGCCGAACTCATCGTTCCAGGCCCCGTGC	51	10	8	55	9	1	1	135
GGTGTCGTAGGGCCGGAACTCATCGTTCCAGGCCCGTGC	0	0	6	21	24	33	51	135
GTGAGTGTAGGGCCGAACTCATCGTTCCAGGCCCCGTAGC	3	2	1	30	13	32	54	135
GAGTGTCGTAGGGCCGAACTCATCGTTCCAGGCCCTGTGC	18	1	10	55	16	17	18	135
AGAGTTCTAGGGCCGAACTCATCGTTCCAGGCCCCGTGC	55	6	14	42	2	6	9	134
GTGATGTGTAGGGCCGAACTCATCGTTCCAGGCCCCGGCG	0	0	1	28	10	44	50	133
GTGTGTGTAGGGCCGAACTCATCGTTCCAGGCCCCGTGTC	16	0	3	49	17	29	18	132
AGTGTTGTAGGGCCGAACTCGTCGTTCCAGGCCCCGTGC	52	16	14	40	3	3	3	131
AGTGTTGTAGGGCCGAATCATCGTTCCCAGGCCCCGTGC	53	7	24	28	11	4	4	131
GGCTGTCGTAGGGCCGAACTCATCGTTCCAGGCCCCGTGC	2	0	2	24	41	39	22	130
TGAGTTGTAGGGCCGAACTCATCGTTCCAGGCCCCTGTCG	6	1	6	32	14	24	46	129
GGGTGTTGTAGGGCCGAACTCAATCGTTCCAGGCCCCGTGC	16	3	15	41	24	14	16	129
GAGTGTCATAGGGCCGAACTCATCGTTCCAGGCCCCGTGC	12	0	11	73	9	18	6	129
GGTCGTCGTAGGGCCGAACTCATCGTTCCAGGCCCGTGC	3	1	4	19	15	49	38	129
GTGAGTTGTAAGGGCCGAACTCATCGTTCCAGGCCCCGTGC	6	2	4	32	10	23	50	127
GGGTGTCGTAGGGCCGAACATCATCGTTCCAGGCCCCGTGC	2	1	6	24	19	30	45	127
GGTGTCGTAGGGCCGAACTCATCGTTCCAGGCCCCCTGTCG	0	1	0	12	20	56	38	127
TGAGTTGTAGGGCCGAACTCATCGTTCCGGGCCCCGTGC	14	2	10	29	14	17	41	127
TGAGTGTAGGGCCGAACTCATCGTTCCAGGCCCCGTAC	8	3	9	54	15	14	24	127
GTGATGTCGTAGGGCCGAACTCATCGTTCCAGGCCCCGTA	3	0	3	28	14	43	35	126
GGGTGTCGTAGGGCCGAACCCCATCGTTCCAGGCCCCGTGC	2	3	10	29	47	9	25	125
GTGAGTCGTAGGGCCGAACTCATCGTTCCAGGCCCCGTGT	4	0	0	32	26	37	26	125
GGTGTGTCGTAGGGCCGAACTCATCGTTCCCAGGCCCCGTGC	3	1	5	47	20	19	29	124
TGAGATGTAGGGCCGAACTCATCGTTCCAGGCCCCGTGC	15	3	3	46	12	16	29	124
GGGTGTCGTAGGGCCGAACTCATCGTTCCAGGCCCCGGGC	1	2	9	32	33	21	26	124
GTGATGTGTAGGGCCGAACTCATCGTTCCCAGGCCCGTGC	1	0	0	17	19	28	58	123
GATGTCGTGGACGGCAACTCATCGTTCCAGGCCCCGTGC	14	2	9	36	35	22	5	123
GTGAGTGTAGGGCCGAACTCATCGTTCCAGGCCCCGTGGC	3	0	1	32	10	40	37	123
GGATGTGTGTAGGGCCGAACTCATCGTTCCAGGCCCCGTGC	6	3	9	64	18	19	3	122
TGAGTTGTAGGGCCGAACTCATCGTTCCCAGGCCCCCGTGCC	12	1	15	36	12	10	35	121
GAGTGTCGTAGGGCCGAACTCATCGTTCCAGGCCCCGTAC	17	11	17	57	16	3	0	121
AGTGTTGTAGGGCCGAACTCATCCGTTCCCAGGCCCCGTGC	53	11	24	29	1	1	1	120
GGTGTCGTAGGGCCGAACTCATCGTTCCAGGCCCCCGTGGC	3	2	6	25	30	21	33	120
TGAGTGTAGGGCCGAACTCATCGTTGCCAGGCCCCGTGC	7	5	4	38	13	22	31	120
GGGTGTGTCGTAGGGCCGAACTCATCGTTCCAGGCCCCGTGC	5	3	5	28	19	20	40	120
AGTGTCCGTAGGGCCGAACTCATCGTTCCAGGCCCCGTGC	31	6	24	39	7	8	5	120
GGGTGTTGAGGGCCGAACTCATCGTTCCAGGCCCCGTGC	12	4	26	32	19	18	8	119
GGGTGTCGTAGGGCCGAACTCATCGTTCCAGGCCCCGAGC	2	1	5	36	25	18	32	119
GTGACTGGTACGGCAACTCATCGTTCCAGGCCCCGTGC	2	0	4	36	26	29	22	119
GTGTGTCGTAGGGCCGAACTCATCGTTCCAGGCCTCGTGC	8	0	3	27	4	39	37	118
GGTGTCGTAGGGCCGAACTCATCGTTCCAGGCCCCGGGGTGC	5	3	4	17	17	41	31	118
GTGAGTGCTAGGGCCGAACTCATCGTTCCAGGCCCCGTGC	0	0	2	22	15	33	45	117
AGAGTTGGTAGGGCCGAACTCATCGTTCCCAGGCCCCGTGC	22	9	17	29	13	10	17	117
GTGTGTCGTAGGGCCGAACTCATCGTTCCAGGCCCCGTCGC	7	0	3	41	8	35	23	117
GTGATGTCGTAGGGCCGAACTCATCGTTCCAGGCCCCGCG	1	0	0	19	12	41	43	116
AGTGTTGTAGGGCCGAACTCATCGTTCCAGGCCCCATAC	51	11	17	36	0	1	0	116
GTGTCGTAGGGCCGAACTCATCGTTCCAGGCCCCTGTGC	3	3	3	22	17	35	33	116
TGAGTTGTAGGCGGAACTCATCGTTCCAGGCCCCGTGC	15	2	7	38	18	15	20	115
AGAGTTGGTAGGGCCGAACTCATCGTTCCAGGCCCCGTGC	23	2	15	38	18	8	10	114
GAGTGTCGTAGGGCCGAACTCATCGTTCCAGCCCCGTGC	17	0	11	47	18	13	8	114
GGTGTCGTAGGGCCGAACTCATTCGTTCCAGGCCCCCGTGC	7	0	4	15	11	30	46	113
GGTGTCGTAGGGCCGAACCTCTTCCGATGCCCAGGCCGTCG	0	0	0	14	1	49	49	113
GTGAGTTGTAGGGCCGAACTCATCGTTCCAGGCCCCGTGT	12	2	7	55	14	10	13	113
AGTGTTGTAGGGCCGAACCCATCGTTCCAGGCCCCGTGT	49	9	4	48	3	0	0	113
GGAGTGTAGGGCCGAACTCATCGTTCCAGGCCCCGTGC	5	1	2	20	21	36	28	113
GATGTGTCGTAGGGCCGAAACTCATCGTTCCAGGCCCCGTGC	15	1	1	42	13	30	10	112
GGTGTCGTAGGGCCGAACTCATCGTTCCCAGGCCCCATGC	4	4	4	13	19	22	46	112
AGTGTCGTAGGGCCCGAACTCATCGTTCCAGGCCCCGTGC	32	10	14	35	6	10	4	111
TGAGTTGTAGGGCCGAACTCATCGTTCCTGGCCCCGTGC	8	1	15	26	5	9	46	110
GGAGTTGTAGGGCCGAACTCATCGTTCCAGGCCCCATGC	13	1	5	36	9	22	23	109
GGGTGTCGTAGGACGCGAACTCATCGTTCCAGGCCCCGTGC	0	1	4	18	23	25	38	109
GAGTGTCGTAGGGCCGAACTCATCGTTCCAGGCCTCGTGC	14	4	8	45	10	16	12	109
GGATGTCGTAGGGCCGAACTCATCGTTCCAGGCCCCATGC	3	3	10	9	21	37	26	109
GTGAGTTGTAGGGCCAACTCATCGTTCCAGGCCCCGTGC	5	4	3	38	2	22	35	109
TGAGTTGTAGGGCCGAACTCATCGTTCCCAGGCCCCGTGT	17	5	4	26	32	8	17	109
GAGTGTGTACGGGCCGAACTCATCGTTCCAGGCCCCGTGC	6	2	5	45	18	20	12	108
GGTGTCGTAGGGCCGAACTCATCGTTCCAGGCCCCCGTCGC	2	0	6	10	10	40	40	108
GGTGCGTAGGGCCGAAACTCATCGTTCCAGGCCCCCGTGC	0	0	6	11	15	36	40	108
GGTGTCGTAAGGGCCGAACTCATCGTTCCAGGCCCCGTG	3	2	2	17	13	36	35	108
TGATGTTGTAGGCCGAACTCATCGTTCCAGGCCCCGTGC	15	6	9	58	1	10	9	108
AGTGTTGTAGGGCCGAACTCATCGTTCCAGGCCCCGGTCG	37	4	19	38	7	2	0	107
GTGTGTCGTAAGGGCCGAACTCATCGTTCCAGGCCCCGTGC	5	0	2	28	12	40	20	107
GCGTGCGTAGGGCCGAACTCATCGTTCCAGGCCCCGTGC	7	1	4	29	14	27	25	107
GGGATGTCGTAGGGCCGAACTCATCGTTCCAGGCCCCGTGC	2	1	10	15	19	23	37	107
TGAGTGTAGGGCCGAACTCATCCGTTCCAGGCCCCGTGC	5	0	11	23	9	26	32	106
GGGTGTCGTCGGGCCGAACTCATCGTTCCAGGCCCCGTGC	0	1	1	7	25	26	46	106
ATGTGCGTAGGGCCGAACTCATCGTTCCAGGCCCCGTGC	3	2	2	35	11	34	18	105
AGTGTTGTAGGGCCGAACTCATCGTTCCAGGCCCCGCGT	91	4	1	8	0	1	0	105
GGTGTCGTAGGGCCGAACTCATCGATTCCAGGCCCCGTG	2	1	3	21	19	30	29	105
GGGTGCGTAGGGCCGAAACTCATCGTTCCAGGCCCCGTGC	1	2	3	9	16	43	30	104
TGAGTGTAGGGCCGAACCCATCGTTCCAGGCCCCGTGC	7	2	3	42	6	15	29	104
GGGTGTCGTAGGGCCGAACTCATGTTCCAGGCCCCGTGC	4	0	2	22	15	33	27	103
GAGTGTCGTAGGGCCGAACTCATCGTTCCAAGCCCCGTGC	8	4	8	43	16	10	14	103
GTGAGTGTAGGGCCGAACTCATCGTTCCAGGCCCCGGCG	0	0	0	34	6	44	19	103
GTGATGTCGTAGGCCGAACTCATCGTTCCAGGCCCGTGC	0	0	0	17	7	32	47	103
GTGTCGTAGGGCCGAACTCATCGTTCCAGGGCCCCGTGC	2	1	3	20	11	35	31	103
AGTGTGTAGGGCCGGAACTCATCGTTCCAGGCCCCGTGC	39	13	15	24	6	4	2	103
GTGAGTTGTAGGGCCGAACTCATCGTTCCAGGCCCCATGC	8	1	3	38	8	25	20	103
GGTGTCGTAGGGCCGAACTCATCGTTCCAAGGCCCCGTGCC	1	2	2	12	19	14	53	103
GGGTGTTGTAGGGCCGAACCCATCGTTCCAGGCCCCGTGC	15	12	15	25	12	9	14	102
GGTGTCGTAGGGCCGAACTCATCGTTCCAGGCCCCGTCTC	1	0	1	7	5	35	53	102
GGGTGTCGTAGGGCCGAACTCATCGTTTCAGGCCCCGTGC	4	4	7	18	20	15	34	102
AGGTGTGTAGGGCCGAACTCATCGTTCCAGGCCCCGTGC	22	2	11	37	13	10	7	102
GAGTGTTGTAGGGCCGAACTCATCGTTCCAGGCCCCGTAC	36	16	13	32	4	1	0	102
GAGTGTCGTAGGGCCGAAGCTCATCGTTCCAGGCCCCGTGC	9	3	9	39	14	23	4	101
AGTGTTGTAGGCCGAACTCATCGTTGCCAGGCCCCGTGC	34	42	7	15	1	1	0	100
TGAGTTGTAGGGCCGAACTCATCGTTCCAGGCCCCCTG	46	7	8	26	6	5	2	100
GGTGTCGTAGGCCGCAACTCATCGTTCCAGGCCCCGTGC	3	0	7	16	16	25	33	100
GGTGTCGTAGGGCCGAACTCATCGTTCCAGGCCCCTTG	2	1	10	17	9	23	38	100
TGAGTTGTAGGGCCGAACTCATCGTTACCAGGCCCCGTGC	5	1	6	39	11	10	28	100
GATGTCGTAGGGCCGAACTCATCGTTCCAAGGCCCCGTGC	5	2	9	22	15	27	19	99
GGTGTCGTAGGGCCGAACCTCATCCGTGCCCAGCCGCG	2	0	0	4	9	46	38	99
GGGTGTCGTAGGGCCGAACCTCATCGTTCCAGGCCCCGTGC	2	3	3	13	24	20	34	99
AGTGTTGTAGGGCCGAACTTATCGTTCCAGGCCCCGTGT	73	8	7	8	2	0	0	98
ATGAGTTGTAGGGCCGAACTCATCGTTCCAGGCCCCATGC	17	0	2	65	8	5	1	98
AGTGTTGTCGGGCCGAACTCATCGTTCCAGGCCCCGTGT	45	3	4	34	8	3	1	98
GGTGTCGTAGGGCCGAACTCATCGTTCCAGGCCCCAAGTGC	3	2	4	16	9	30	33	97
GGTGTCGTAGGGCCGAACTCATCGTTCCAGGCCCCTTGTGC	1	0	0	14	14	38	30	97
AGTGTCGTAGGGCCGAACTCATCGTTCCAGGCCCCGTACG	15	8	19	44	6	4	1	97
GGTGTTGTAGGGCCCGAACTCATCGTTCCAGGCCCCGTGC	15	6	11	27	13	13	11	96
GAGTGTCGTAAGGCCGAACTCATCGTTCCAGGCCCCGTGC	15	0	5	36	17	15	8	96
GGGTGTCGTAGGGCCTAACTCATCGTTCCAGGCCCCGTGC	4	0	6	16	8	27	35	96
GAGTGCGTAGGGCCGAACTCATCGTTCCAGGCCCCCGTGC	4	0	6	44	17	13	12	96
GGGTGTCGTAGGGCCGAAACTCATCGTTCCAGGCCCCGTGCC	0	3	6	12	7	22	46	96
GGTGTCGTAGGGAACCGAACTCATCGTTCCAGGCCCCGTGC	1	0	3	20	15	30	27	96
GGGAGTTGTAGGGCCGGAACTCATCGTTCCAGGCCCCGTGC	0	1	5	6	6	45	33	96
GTGATGTCGTAAGGGCCGAACTCATCGTTCCAGGCCCCGTGC	1	0	0	12	5	37	41	96
GAGTGTCGTAGGGCCAAACTCATCGTTCCAGGCCCCGTGC	16	1	9	41	9	13	6	95
GGGAGTCGTAGGGCCGAACTCATCGTTCCAGGCCCCGTGC	3	1	1	23	23	18	26	95
TGAGTTGTAGGGCCGAACTCATCGTTCCAGGCCCCGCCCC	52	2	4	12	9	7	9	95
GAGTGTTGGTAGGGCCGAACTCATCGTTCCAGGCCCCGTGC	32	12	18	20	8	5	0	95
GGGTGTCGTAGGGCCGAACTCATCGTTCCAGGCCCCGCCC	33	2	3	22	22	4	9	95
GTGTGTAGTAGGGCCGAACTCATCGTTCCAGGCCCCGTGC	3	1	1	25	6	31	27	94
GAGTGTTGTAGGGCCGAACTCATCGTTCCAGGCCCCATGC	42	14	9	21	5	1	2	94
GTGTGTGTAGGGCCGAACTCATCGTTCCAAGGCCCCGTGC	3	0	2	30	4	26	29	94
GGTGTTTTCGTAGGGCCGAACTCATCGTTCCAGGCCCCGTGC	5	2	6	13	14	26	27	93
GGGTGTCGTAGAGCCGAACTCATCGTTCCAGGCCCCGTGC	3	0	7	14	13	17	38	92
ATGATGTCGTAGGGCCGAACTCATCGTTCCAGGCCCCGTGC	9	0	2	31	16	21	13	92
GAGTGTCGTAGGGCCGAATCATCGTTCCAGGCCCCGTGC	14	3	5	40	10	17	3	92
GGTGTCGTTAGGGCCGAAACTCATCGTTCCAGGCCCCGTGC	3	0	4	10	11	24	40	92
AGTGTTGTCGGGCCGAACTCATCGTTCCAGGCCCGTGC	26	3	15	35	7	5	1	92
GGTGTCGTAGGGCCGAATCATCGTTCCAGGCCCCGTCGC	0	1	8	23	3	23	34	92
AGAGTTGTAGGGCCGAACTCATCGTTCCAGGCCCTGTGC	23	0	8	44	7	5	4	91
GAGTGTCGTAGGGCCGAACTCATCGTTCCAGGCCCCGCGC	14	0	7	52	13	4	1	91
GTCGAGTCGTAGGGCCGAACTCATCGTTCCAGGCCCCGTGC	2	0	3	18	11	25	32	91
GGTGTCCGTAGGCCGAACTCATCGTTCCAGGCCCCGTGC	0	2	3	9	13	41	22	90
AGTGTTGTAGGGCCGAACTCATCGTTCCAGGCCCCATG	69	6	5	10	0	0	0	90
GGTGTCGTAGGGTTCCGAACTCATCGTTCCAGGCCCCGTGC	1	1	3	17	10	30	28	90
GAGTCGTAGGGCCGAACTCATCGTTCCAGGCCCCATGC	5	2	13	34	11	8	17	90
GGTGTCGTAGGGCCGAACCTCTTCCGTGCCCAGGCCGCG	0	1	1	11	2	48	27	90
GGGTGTCGTAGGGCCGAACTCATCGTTCCAGGCCCCGTCCC	5	1	9	17	32	10	16	90
GTGAGTTGTAGGGCCGAACTCATCGTTCCAGGCCCCGTGCC	5	20	4	18	6	9	27	89
GTGAGTCGTAGGGCCGAACTCATCGTTCCAGGCCCCGTGCC	1	0	0	22	12	30	24	89
GGATGTCGTAGGGCCGAACTCATCGTTCCAGGCCCCGTACG	2	0	4	17	15	23	28	89
GAGTGTCGTAGGGCCGAACTCATCGTTCCAGGCCCCGTGTC	16	1	10	45	13	1	2	88
TGATGTGTAGGGCCGAACTCATCGTTCCCAGGCCCCGTGC	0	0	3	18	9	24	33	87
GGTGTCGTAGGGCCGAACCCATCTTCCAGGCCCCGTGC	3	0	7	15	7	20	34	86
GTGATGTCGTAGGGCCGAACTCATCGTTCCAGCCCCGTGC	0	1	0	14	6	27	38	86
TGAGTTGTAGGGCCGGACTCATCGTTCCAGGCCCCGTGC	8	0	1	23	7	16	30	85
GTGATGTGTAGGCCGAACTCATCGTTCCAGGCCCGTGC	1	0	0	17	8	29	30	85
GGTGTCGTAGGGCCGAACCTCTCCGTGCCCAGGCCGCG	0	0	1	6	2	47	29	85
TGAGTTGTAGGGCCGAACTCATCGTTCCCAGGCCCCGTG	8	3	10	15	13	12	24	85
GAGTGTCGCAGGGCCGAACTCATCGTTCCAGGCCCCGTGC	19	1	5	31	7	15	7	85
GGATGTCGTAGGGCCGAACTCATCTTCCAGGCCCCGTGC	2	0	5	10	17	29	22	85
GGTGTCGTAGGGCCGAACTCATCGTTCCAGGCCCCGGT	0	0	0	9	11	36	29	85
GAGTCGTAGGGCCGAACTCATCGTTCCCAGGCCCCGTGC	2	1	10	25	11	22	14	85
GGGTGTCGTAGGGCCGAACTCATCGTTCCAGGCCCCGTTGC	2	2	2	17	17	18	27	85
AGTGTTGTAGGGCCTAACTCATCGTTCCAGGCCCCGTGC	36	8	11	23	5	0	1	84
GAGTTGTAGGGCCGAACTCATCGTTCCAGGCCCCGTGC	7	1	8	18	10	20	20	84
TGAGTTGTAGGGCCGAACGCATCGTTCCAGGCCCCGTGC	5	1	8	34	9	5	22	84
GGTGTCGTAGGGCCGAACCTCGTTCCATGCCCGCCGTCG	0	0	4	10	3	28	39	84
AGAGTTGTAGGGCCGAACTCATCGTTCCAGGCCCCGTCC	16	0	10	26	10	15	7	84
GGTGTCGTAGGGCCGAACTCATCGTTCCAGGCCCCGGTGCC	3	0	3	9	16	21	32	84
TGAGTTGTAGGGCCGAACTCATCGTTCCAAGGCCCCCGTGC	7	6	6	28	7	6	24	84
TGAGTTGTAGGGCCGAACTCATCGTTTCCAGGCCCCCGTGC	8	4	4	24	5	9	30	84
AGATGTTGTAGGGCCGAACTCATCGTTCCCAGGCCCCGTGC	15	2	10	40	6	6	5	84
GGTGAGTTGTAGGGCCGAACTCATCGTTCCAGGCCCCGTGC	5	1	8	22	8	13	26	83
AGTGTTGTAGGGCCGAACTCATCGTTCCAGGCCCCCGTCG	52	2	12	16	1	0	0	83
GGTGTCGTAGGGCCGAACTCATCGTTCCCAGGCCCCGTAGC	1	0	4	11	13	18	36	83
AGTGTTGTAGGGCCGAACTCATCGTTCCAGGCCCTGTG	72	1	3	5	1	0	0	82
GGTGTTGTAGGGCCGAACTCATCGATTCCAGGCCCCGTGC	13	3	8	20	19	7	12	82
GGTGTCGTAGGGCCGAACCATCGTTCCAGCCCCGCTGC	0	0	0	13	2	38	29	82
GGTGTGGTAGGGCCGAATCATCGTTCCAGGCCCCGTGC	0	1	8	11	23	16	23	82
GAGTGCGGTAGGGCCGAACTCATCGTTCCAGGCCCCGTGC	10	2	2	24	15	20	9	82
AGTGTTGTAGGGCCGGAACTCATCGTTCCAGGCCCCCGTGC	43	9	6	18	3	3	0	82
GAGTGCGTAGGGCCGAACTCATCGTTCCAGGCCCCGTG	12	1	1	26	20	16	6	82
GTGTGTGTAGGGCCGAATCATCGTTCCAGGCCCCGTGC	3	0	1	23	7	31	17	82
TGAGTTGTAGGGCCGAACTCATCGTTCCAGGCCCCCATGC	7	4	3	38	5	8	16	81
GTGTGTCGTAGGGCCGAACTCATCGTTCCAGCCCCGTGC	1	0	1	26	5	27	21	81
TGAGTGTAGGGCCGAACTTATCGTTCCAGGCCCCGTGC	11	4	4	23	7	10	22	81
GTGTGTCGTAGGGCCGAACTCATCGTTCCAGGCCCTGTGC	3	0	1	18	7	27	25	81
GGTGTTGTAGGGCCGAACTCACTCGTTCCAGGCCCCGTGC	8	2	18	15	16	13	9	81
GGTGTAACGTAGGGCCGAACTCATCGTTCCAGGCCCCGTGC	3	0	1	11	20	29	17	81
GTGATGTAGTAGGGCCGAACTCATCGTTCCAGGCCCCGTGC	1	0	2	12	10	28	27	80
TGAGTGTAGGGCCGAACTCATCGTTCCAGGCCCCGTCG	0	2	4	29	10	15	20	80
ATGAGTTGTAGGCCGAACTCATCGTTCCAGGCCCCGTGC	17	2	6	33	5	7	10	80
GTGTGTCGTAGGGCCGAACACATCGTTCCAGGCCCCGTGC	2	2	2	34	3	21	16	80
GGTGTCGTAAGGGCCGGAACTCATCGTTCCAGGCCCCGTGC	2	2	3	9	13	22	29	80
GGTGTCGTAGGGCCGAACTCATCGTTCCAGGCCCCGTAAC	6	2	6	19	21	8	17	79
GAGTGTCGTGGGGCCGAACTCATCGTTCCAGGCCCCGTGC	3	2	5	40	17	6	6	79
GGTGATCGTAGGGCCGAACTCATCGTTCCAGGCCCGTGC	0	1	3	21	10	22	22	79
AGAGTTGTAGGGCCGAACTCATCGTTCCAGGCCTCGTGC	26	4	13	22	5	6	3	79
GGTGTGTGGTAGGGCCGAACTCATCGTTCCCAGGCCCCGTGC	3	0	0	50	9	9	8	79
GGGTGTCGTAGGGCCGAACTCATCGTTCCAGGCCCCCGTG	0	1	5	16	8	24	25	79
GTGATGTGTTAGGGCCGAACTCATCGTTCCAGGCCCCGTGC	4	0	0	16	5	26	27	78
AGTGTTGTAGGCCGAACTCATCGTTCCAGGCCCCCTGC	32	5	21	19	0	1	0	78
AGAGTTGTAGGGCCGAACTCATCCGTTCCAGGCCCCGTGC	13	4	15	28	6	7	5	78
GTGTGTCGTAGGGCCGAACTCATCGTTCCAGGCCCCTGCG	1	1	2	33	3	25	13	78
AGTGCTGTAGGGCCGAACTCATCGTTCCAGGCCCCGTAC	33	12	18	12	3	0	0	78
AGTGTTGTAGGGCCGAACTCAACGTTCCAGGCCCCGTGC	21	8	11	22	5	11	0	78
GGGTGTCGTAGGGCCTGAACTCATCGTTCCAGGCCCCGTGC	4	2	2	11	12	19	27	77
GTGATGTGTAGGGCCGAACTCAATCGTTCCAGGCCCCGTGC	1	0	0	7	8	33	28	77
GGTGTCGTAGGGCCGAACTTATCGTTCCAGGCCCCGTG	12	2	1	18	12	9	23	77
GGGTGTCGTAGGGCCGAACTCATCGTTCCAGGCTCCGTGC	2	0	5	13	10	15	31	76
GGTGTCGTAGGGGCCGAAACTCATCGTTCCAGGCCCCCGTGC	1	2	4	11	7	24	27	76
GGTGTCGTAGGGCCGAACCTCGTCCATGCCCAGCCGCG	0	0	2	4	3	32	35	76
AGTGTTGTAGGGCCGGGAACTCATCGTTCCAGGCCCCGTGC	39	2	11	22	1	0	1	76
GGGTGTCGTAGGGCCGAACTCATCGTTCCAGGTCCCGTGC	1	1	4	18	15	13	23	75
GAGTGCGTAGGCCGAACTCATCGTTCCAGGCCCCGTGC	3	3	5	28	6	20	10	75
GGGTGTTGTAGGGCCGAACTCATCGTTCCAGGCCCCGCGC	12	7	8	27	4	10	7	75
GAGTGTGCTAGGGCCGAACTCATCGTTCCAGGCCCCGTGC	17	2	5	36	5	5	5	75
GAGTCGTAGGGCCGAACTCATTGTTCCAGGCCCCGTGC	24	2	9	32	1	6	1	75
GAGTGTTCTAGGGCCGAACTCATCGTTCCAGGCCCCGTGC	49	4	5	12	2	2	0	74
GACTGTCGTAGGGCCGAACTCATCGTTCCAGGCCCCGTGC	16	2	3	32	9	9	3	74
AGTGATGTAGGCCGAACTCATCGTTCCAGGCCCCGTGC	32	4	13	13	4	7	1	74
GGTGTCGTAGGGCCGAACTCATCATGTCCAGGCCCCGTGC	1	1	0	10	3	30	29	74
AGAGTTGCAGGGCCGAACTCATCGTTCCAGGCCCCGTGC	41	3	1	19	3	1	5	73
AATGTTGTAGGGCCGAACTCATCGTTCCAGGCCCCTGC	51	5	3	11	1	0	2	73
GGTGTCGTAGGGCCGAACTTCATCGTCCAGGCCCCGTGC	0	0	1	7	9	29	25	71
GGGTGTCGTAGGGCCGTAACTCATCGTTCCAGGCCCCGTGC	2	2	1	15	20	9	21	70
GTGTGTCGTAGGGCCGAACTCATTGTTCCAGGCCCCGTGC	49	1	1	11	2	4	2	70
GTGTGTCGTAGGGCCGAACTCATCGTTCCAGGCCCCGTGCC	3	0	0	27	6	20	14	70
TGAGTTGTAGGGCCGAACTCATCGTTCCAGGCACCGTGC	1	0	0	24	0	12	33	70
GGATGTCGTAGGGCCGAACTCATCGTTCCAGCCCCGTGC	1	0	4	11	17	16	21	70
GGTGTCGTAGGGCCGAACCTCATCGTTCCCAGGCCCGTG	2	1	3	16	2	24	21	69
TGAGTTGTAGGGCCGAACTCATCGTTCCAGGCCCCCGTCG	5	0	6	25	9	7	17	69
TGAGTTGTATGGCCGAACTCATCGTTCCAGGCCCCGTGC	30	0	0	12	5	5	17	69
GAGTGTCGTAGGGCCGAACTCATCATTCCAGGCCCCGTGC	7	5	6	32	7	8	4	69
GGTGTCGTAGGGCCGAACTCATCGTTCCAGGCCCCGTCCGC	0	0	4	8	7	27	23	69
GGTGTCGTAGGGCCGAACTCATCGTTCCAGGCCCCGTT	4	1	1	10	17	22	14	69
GTGTGTCGTAGGGCCAAACTCATCGTTCCAGGCCCCGTGC	5	1	3	12	3	23	21	68
GGTGTCGTAGGGCCGAACTCTCGTTCCAGGCCCCCGTGC	1	0	1	4	6	21	35	68
GGTGTCGTAGGCCGAACTCATCGTTCCAGGCCCGTCGC	1	2	3	8	13	26	15	68
GGGTGTCGTAGGGCCGAATTCATCGTTCCAGGCCCCGTGC	2	2	2	13	6	14	29	68
GATCTGTGTAGGGCCGAACTCATCGTTCCAGGCCCCGTGC	10	0	2	24	6	19	6	67
GATGTGTGGTAGGGCCGAACTCATCGTTCCAGGCCCCGTGC	8	1	1	28	7	18	4	67
GGTGTCGTAGGGCCGAACCATCATTCCTGCCCAGGCCGCG	0	1	0	7	4	27	28	67
GGTGTCGTAGGGCCGAACCTCGTTCCATGCCCAGCCGCG	0	1	0	11	0	26	29	67
TGAGTGTAGGGCCGAACTCATTGTTCCAGGCCCCGTGC	10	0	9	23	4	15	5	66
GAGTGTTGTAGGGCCGAACTTATCGTTCCAGGCCCCGTGC	45	8	5	7	1	0	0	66
AGTGTTTTGTAGGGCCGAACTCATCGTTCCAGGCCCCGTGC	25	6	10	18	3	3	0	65
GTGATGTCGTAGGGCCGAACTCATCGTCCAGGCCCGTGC	0	0	2	11	4	28	20	65
AGTGTTGTAGGGCCGAACTCATCGTTCCAGGCCCCCCC	61	0	0	4	0	0	0	65
GAGTGTCGTAGGGCCGAACTCATCGTTCCAGGCCCCTG	6	3	4	24	11	12	5	65
GGGTGTCGTAGGGCCGAACTCATCGTCCCAGGCCCCGTGC	0	1	3	11	14	17	19	65
GTGATGTCGTAGGGCCGAACTCATCGTTCCAGGCCTCCGTGC	0	0	1	11	6	30	16	64
GGTGCGTAGGGCCGAACTCATTCGTTCCAGGCCCCGTGC	0	0	2	10	7	19	26	64
GTGTCGTAGGGCCGAACTCATCGTTCCAGGCCCTCGTGC	1	0	0	12	6	29	16	64
AGTGTGTAGGGCCGAACTCATCGTTCCAGGCCCCGGGC	11	3	10	32	4	1	3	64
AGTGTTGTAGGGCCGAACTCATCGTTCCAGGCCCCGGTC	19	1	2	27	7	6	1	63
GGTGTCGTAGGGCCGAAGCTCATCGTTGCCAGGCCCCGTGC	3	9	2	2	12	19	16	63
GGTGTCAGTAGGCCGAACTCATCGTTCCAGGCCCCGTGC	0	0	1	2	7	26	27	63
TGAGTTGTAGGGCCGAACTCATCGCTCCAGGCCCCGTGC	2	0	6	23	4	17	11	63
AGCGTTTGTAGGGCCGAACTCATCGTTCCAGGCCCCGTGC	51	3	0	7	2	0	0	63
AGAGTTGTAGGGCCGAACTCATCGTTCCAGGCCCCGGTGC	27	0	7	18	1	8	2	63
CGAGTTGTAGGGCCGAACTCATCGTTCCAGGCCCCCGTGC	30	1	4	13	4	2	9	63
GGGTGTCGTAAGGGCCGAACTCATCGTTCCAGGCCCCCGTGC	1	1	4	13	1	13	30	63
AGTGTCGTAGGGCCGAACTCATCGATTCCAGGCCCCGTGC	16	1	13	17	6	5	4	62
AGTGTGTAGGGCCGAACACATCGTTCCAGGCCCCGTGC	24	4	9	17	5	1	2	62
GGGTGTCGTAGGGCCGAAACTCATCGTTCCAGGCCCGTGC	1	0	2	8	11	15	25	62
GGGTGTCGTAGGGCCGAACTCATCGTTCCAGGCCCCTG	1	0	3	4	22	16	16	62
GGGTGACGTAGGGCCGAACTCATCGTTCCAGGCCCCGTGC	10	0	1	16	10	8	16	61
GGTGTCGTAGGGCCGAACTCATCGTTCCAGGCCCCGTCGT	1	0	0	4	7	26	23	61
TGAGTGTTAGGGCCGAACTCATCGTTCCAGGCCCCGTGC	8	2	7	15	4	12	13	61
GAGTGTCGTAGGGCCGAACTCATCGTTCCAGGCCCCGCCG	26	1	6	14	8	6	0	61
GGTGTCGGTAGGGCCGAACTCATCGTTCCAGCCCCGTGC	0	0	1	2	17	27	14	61
GGTGTGTGTAGGGCCCGAACTCATCGTTCCAGGCCCCGTGC	4	1	3	21	7	10	15	61
AGTGTTGTAGGGCCGAACTCATCGTTCCAGGCCCCCGTAC	29	8	12	11	0	1	0	61
AGTGTTTGTAGGCCGAACTCATCGTTCCAGGCCCCGTGC	25	3	7	23	1	1	1	61
GGTGTCGTAGGGCCGAACTCATCGTTCCCAGGCCCCGTGGC	0	0	5	7	6	18	25	61
AGTGTTGTAGGGCCGAACTCATCGTTCCCAAGGCCCCGTGC	21	6	10	15	3	3	2	60
GAGTGTCGTAGGGCCGAACTCATCGTTCCAGGCCCGTG	17	2	2	20	8	8	3	60
GGTGTCGTAGGGCCGAACTCATCGTTGCCAGCCCCGTGC	0	4	2	5	9	18	22	60
GTGTCGTAGGGCCGAACTCATCGTTCCAGGCCCACGTGC	1	0	0	19	4	21	15	60
GAGTGTCGTAGGGCCGAACCCATCGTTCCAGGCCCCGTGC	2	2	6	40	5	1	4	60
GGTGTCGTAGGGCCGAACTCATCGTTCCAGGGCCCCGTGCC	1	0	2	9	7	18	23	60
GTGTCGTAGGGCCGAACTTCATCGTTCCAGGCCCCGTGC	1	1	2	18	8	16	14	60
GGTGTTTGTAGGGCCGAACTCATCGTTCCAGGCCCCGTGC	6	3	11	18	10	10	2	60
GGTGTCGTAGGGCCGAATCATCGTTCCAGGCCCCATGC	1	0	6	17	7	8	21	60
AGTGTTGTAGGCCGAACTCATCGGTTCCAGGCCCCGTGC	31	4	9	6	10	0	0	60
TGATTCGTAGGGCCGAACTCATCGTTCCAGGCCCCGTGC	54	2	0	3	0	0	0	59
GGGTGTCGTAGGCGCGAACTCATCGTTCCAGGCCCCGTGC	0	0	1	9	14	21	14	59
GATGTCGTAAGGGCCGAACTCATCGTTCCAGGCCCCGTGC	3	2	4	9	9	15	17	59
GTGTCGTAGGCCGAACTCATCGTTCCAGGCCCCGTAGC	0	0	4	10	10	16	19	59
AGTGTTGTAGGGCCGAACTCATCGTCCCAGGCCCGTGC	30	4	5	15	3	1	1	59
GAGTGTGTAGGGCCGAACTCATGTTCCAGGCCCCGTGC	34	0	0	16	4	4	1	59
GATGTCGTAGGGCCGAACTCATCGTTCAGGCCCCGTGC	5	0	3	18	10	15	8	59
GGGTGTCGTAGGGCCGAATCATCGTTCCAGGCCCCGTG	2	1	2	10	3	18	22	58
GGGTGTAGTAGGGCCGAACTCATCGTTCCAGGCCCCGTGC	0	1	1	6	10	20	20	58
GGTGTCGTAGGGCCGAACAATCATCGTTCCAGGCCCCGTGC	2	2	2	8	6	19	19	58
GTGATGTCGTAGGGCCGAACTCATCGTTCCAGGCCCGTG	1	0	0	10	13	21	13	58
AGTGCTGTAGGGCCGAACTTATCGTTCCAGGCCCCGTGC	48	3	3	4	0	0	0	58
GAGTGTTGTAGGGCCGAACCCATCGTTCCAGGCCCCGTGC	16	10	11	16	1	1	3	58
AGTGTGTAGGGCCGAACTCATCGTTCCAGGCCCCGTGTC	25	0	6	21	2	4	0	58
GGGTGTCGTAGGGCCGAACTCATCGTTCCAGGCCCCGTACC	6	2	8	10	25	2	4	57
GTGAGTGTAGGGCCGAAACTCATCGTTCCCAGGCCCCGTGC	1	0	3	8	2	22	21	57
AGTGTTCGTAGGGCCGAACTCATCGTTCCAGGCCCCCGTGC	20	3	8	22	2	2	0	57
GGGTGTCGTTGGGCCGAACTCATCGTTCCAGGCCCCGTGC	0	1	4	10	13	13	16	57
GGGTGTCGTAGGGCCGAACTCATCGTTCCAGACCCCGTGC	3	0	4	7	10	17	16	57
AGTGTGTAAGGCCGAACTCATCGTTCCAGGCCCCGTGC	13	2	4	34	1	1	2	57
GGTGTCGTAGGGCCGAACCTCGTTCCATGCCCAGGCCGCG	0	0	3	7	1	20	26	57
GGTGTCGTAGGGCCGAACCTCATCCTGCCCAGCCGTCG	0	1	0	2	7	27	20	57
GGGTGTCGTAGGGCCGAAGCTCATCGTTCCAGGCCCCGTGC	3	1	4	6	9	15	19	57
AGTGTGTGGTACGGCGAACTCATCGTTCCAGGCCCCGTGC	41	0	5	9	2	0	0	57
AGTTTGTTGTAGGGCCGAACTCATCGTTCCAGGCCCCGTGC	26	5	7	12	5	1	1	57
GAGTGTGTAGGGCCGAACTCATCGTTCCAGGGCCCCGTGC	6	1	8	24	4	10	3	56
TGAGTTGTAGGGCCGAAAACTCATCGTTCCAGGCCCCGTGC	3	1	6	17	8	5	16	56
GTGAGTTGGTAGGGCCGAACTCATCGTTCCCAGGCCCCGTGC	3	0	4	8	11	10	20	56
GGGTGTCGTAGGGCCGAACCTCATCGTTCCCAGGCCCCGTGC	1	2	0	9	16	8	20	56
GGGTGTCGCAGGGCCGAACTCATCGTTCCAGGCCCCGTGC	4	2	4	20	12	7	7	56
TGAGTTTAGGGCCGAACTCATCGTTCCAGGCCCCGTGC	0	0	1	8	5	19	23	56
TGTGTTGTAGGGCCGAACTCATCGTTCCAGGCCCCGTGT	30	0	5	14	4	3	0	56
GGTGGTCGTAGGGCCGAATCATCGTTCCAGGCCCCGTGC	0	0	3	7	3	23	20	56
GGTGTTGTAGGGCCGAACTCATCGTTCCAGGCCCCATGT	43	5	2	6	0	0	0	56
GGTGTCGTAGGGCCGAAACTCATCGTTGCCAGGCCCGTGC	1	10	4	5	11	10	15	56
GTGTGTGTAGGACGCAACTCATCGTTCCAGGCCCCGTGC	4	0	0	9	2	22	18	55
AAAGTGTTGTAGGGCCGAACTCATCGTTCCAGGCCCCGTGC	27	5	7	12	3	1	0	55
TGAGTTGTAGGGCCGAACCCATCGTTCCAGGCCCCGTGT	10	0	1	19	9	3	13	55
GGTGTCGTAGGGCCGAACTCATCGTTCCAGGCCCCCGTTGC	2	1	1	5	8	17	21	55
GGTGGTCGTAGGGCCGAACTCATCGTTCCAGGCCCCGTAC	2	4	1	23	10	10	5	55
AGTGTTGTAGGGCCGAACTTATTGTTCCAGGCCCCGTGC	37	8	3	7	0	0	0	55
GGTGTCGTGGGGGCCGAACTCATCGTTCCAGGCCCCGTGC	0	1	1	15	23	7	8	55
GGATGTCGTAGGGCCGAACTCATCGTTCCAGGCCCCGTGCC	0	0	1	8	11	19	16	55
GGTGTCTAGGGCCGAACTCATCGTTCCAGGCCCCCGTGC	2	0	3	28	2	7	13	55
GTGATGTGTAGGGCCGAACTCATCGTTCCAGGCCCCGTAGC	0	0	1	11	5	16	21	54
GATGTCGTAGGGGCCGAACTCATCGTTCCAGGCCCCGTGC	2	0	2	10	12	14	14	54
GATGTGCGGTAGGGCCGAACTCATCGTTCCAGGCCCCGTGC	5	0	3	12	9	20	5	54
GGTGTCAGTAGGGCCGAACTCATCGTTCCAGGCCCGTGC	1	2	1	7	12	19	12	54
TGATGTTGTAGGGCCGAACTCATCGTTCCAGGCCCCGTACG	15	0	5	31	1	1	1	54
GGATGTTGTAGGGCCGAACTCATCGTTCCAGGCCCCGTGC	5	1	1	26	5	10	5	53
GGTGTCGTAGGGCCGAAATCATCGTTCCAGGCCCCGTG	0	0	0	11	8	18	16	53
AGTGTTGTGGGGCCGAACTCATCGTTCCAGGCCCCGTGT	44	2	4	2	1	0	0	53
TGAGTGTAGGGCCGAACTCATCGTTCCAAGCCCCGTGC	0	0	3	10	3	17	20	53
GGGTGTTGTAGGGCCGAACTCATCGTTCCAGGCCCCCGTGCC	4	3	4	13	16	8	5	53
GGTGTCGTAGGGCCGAACTTATCGTTCCCAGGCCCCGTGC	1	2	3	8	9	12	18	53
AGTGTTGTAGGGCCGAACTCATCGTTCCAGGCCCCGTGGGC	23	0	5	23	2	0	0	53
AGAGTTGTAGGGCCGAACTCATCGTTCCAGGCCCCGTGA	7	0	2	38	3	1	2	53
GGTGATCGTAGGGCCGAAACTCATCGTTCCAGGCCCCGTGC	0	3	1	10	4	18	17	53
AGTGTTGTAGGGCCGAACTCATCGTTCCAGGCCCCCCTGC	36	4	3	8	1	0	0	52
TGAGTTGTAGGGCCGAACTCATCGTTCCAGGACCCGTGC	7	0	2	7	5	9	22	52
AGTGTTGTAGGGCCGAACCCATCGTTCCAGGCCCCTGC	24	5	9	14	0	0	0	52
CGTGTGTAGGGCCGAACTCATCGTTCCAGGCCCCGTGC	21	3	4	14	4	5	1	52
GGTGTCGTAGGGCCGAAGCTCATCGTTCCAGGCCCCGTG	2	3	2	6	4	19	16	52
GGTGTCGTAGGGCCGAACTCATCGTTCCAGGCCCTGTG	12	3	1	5	2	15	14	52
GAGTGTCGTAGGGCCGAACTCATCGATTCCAGGCCCCGTGC	3	0	7	23	8	9	2	52
GGTGTCGTAGGGCCGAAACTCATCGTTCCAAGGCCCCCGTGC	1	0	3	3	4	16	25	52
GATGTGTGGTAGGGCCGAACTCATCGTTCCCAGGCCCCGTGC	6	0	4	20	15	3	4	52
AGTGTTGTAGGGCCGAACTCATCGTTCCAGGCCCCGTGTG	40	5	4	3	0	0	0	52
GGTGTCGTAGGGCCGAACTCATCGTTCCCAAGGCCCCCGTGC	0	0	3	6	8	12	23	52
AGAGTTGTAGGGCCGAAACTCATCGTTCCAGGCCCCCGTGC	9	4	9	22	1	7	0	52
TGAGTTGTACGGCCGAACTCATCGTTCCAGGCCCCGTGC	15	0	1	14	2	4	16	52
GAGTGTTGTAGGGCCGAACTCATTGTTCCAGGCCCCGTGC	23	11	6	12	0	0	0	52
GATGTCGTAGGGCCGAACTCATCGTTCCAGGCCCCGTCGC	4	0	2	11	9	12	14	52
AGAGTTGTAGGGCCGAACTCATCATTCCAGGCCCCGTGC	14	0	8	21	2	3	4	52
GGGTGTCGTAGGGCCGAAACTCATCGTTGCCAGGCCCCGTGC	3	10	0	3	11	13	11	51
GGTGTCGTAGGGCCGAACTTAATCGTTCCAGGCCCCGTGC	5	0	3	4	12	12	15	51
GGTGTGCGTAGGGCCGAAACTCATCGTTCCAGGCCCCGTGC	1	0	1	16	4	14	15	51
GATGTGTGTAGGGCCGAACTCAATCGTTCCAGGCCCCGTGC	6	0	4	21	7	12	1	51
GTGTCGTAGGGCCGAAACTCATCGTTCCAGGCCCGTGC	2	2	2	4	8	20	13	51
AGTGTTGTAGGCCGAACTCATCGTTCCAGGCCCTGTGC	26	4	10	7	1	1	2	51
AGTGTTGTAGGGCGAACTCATCGTTCCCAGGCCCCGTGC	21	5	3	13	5	2	2	51
GGGTGTCGTAGGGCCGAACTCATCCGTTCCAGGCCCCCGTGC	0	2	1	7	5	16	20	51
GGGTGTCGTAGGGCCGAACTCATCGTTCCAGGCCCAGTGC	3	1	4	7	8	6	22	51
AATGTTGTAGGGCCGAACTCATCGTTCCAGGCCCCGTAC	22	4	9	8	8	0	0	51
TGAGTGTAGGGCCGAACTCATCGTTCCCAGGCCCGTGC	0	1	4	14	9	9	14	51
GGTGTCGTTAGGGCCGAACTCATCGTTCCAGGCCCCCGTGC	0	0	2	7	6	10	25	50
AGTGTTGTAGGGCCGAACCCATCGTTCCAGGCCCCGTG	34	7	4	3	0	0	2	50
AGTGTTGTAGGGCCGAACTCATCGTTCCAGGCCCCCGTGGC	18	8	11	12	1	0	0	50
GGGTGTCGTAGGGCCGAACCCATCGTTCCAGGCCCCGCTGC	0	1	1	13	3	12	20	50
GAGTGTTATAGGGCCGAACTCATCGTTCCAGGCCCCGTGC	16	4	12	13	2	1	2	50
GGTGGTCGTAGGGCCGAACTCATCGTTCCAGGCCCCATGC	0	2	5	11	11	15	6	50
AGTGTCGTAGGGCCGAACTCATCGTTCCAGGCCCGGTG	33	8	5	2	0	1	0	49
GGGTGTCGTAGGACGCAACTCATCGTTCCAGGCCCCGTGC	2	0	3	6	5	12	21	49
GGTGTCGTAGGCCGAACTCATCGTTCCAGGCCCGTGCC	1	0	3	6	9	13	17	49
GGTGTCGTAGGGCCGAACACATCGTTCCAGGCCCCGTG	5	3	2	12	10	9	8	49
GTGAGTTGTAGGGCCGAACTCATCGTTCCAGGCCCCGTCG	0	1	2	14	6	8	18	49
AGAGTTGTAGGGCCGAACTCATCGTTCCAGGCCCGGTG	44	3	0	2	0	0	0	49
GGTGTCGTAGGGCCGAAACCTCATCGTTCCAGGCCCCGTGC	2	0	1	6	6	18	16	49
AGGGTGTTGTAGGGCCGAACTCATCGTTCCAGGCCCCGTGC	25	4	8	11	0	1	0	49
TGAGTTGTAGGGCCGAACTCATTCGTTCCCAGGCCCCGTGC	4	0	4	13	1	4	23	49
GTGTCGTAGGGCCGAACTCATCGTTCCAGGCCCCGTCCG	1	0	0	8	3	21	16	49
GTGATGCGGTAGGGCCGAACTCATCGTTCCAGGCCCCGTGC	0	0	1	9	6	19	14	49
GTAGTTGTAGGGCCGAACTCATCGTTCCAGGCCCCGTGC	1	0	1	16	7	5	19	49
GGGTGTTGTAGGGCCGAACTCATCGTTCCAGGCCCCTGC	7	2	7	9	15	4	5	49
GGTGTCGTAGGGCCGAACTCATCCGTTCCCAGGCCCGTGC	0	0	2	3	5	19	20	49
AGTGTGTAGGGCCGAACTCATCGTTCCAGGCCCCTGTGC	18	9	3	10	3	4	2	49
GGTGATCGTAGGGCCGAAGCTCATCGTTCCAGGCCCCGTGC	1	2	2	10	12	7	15	49
AGTGTTGTAGGGCCGAACTTATCGTTCCAGGCCCCGTAC	34	8	3	3	0	0	0	48
GTGTGTCGCAGGGCCGAACTCATCGTTCCAGGCCCCGTGC	7	0	1	14	5	9	12	48
GTGATGTCGTAGGGCCGAACTCATCGTTCCAGGCCACCGTGC	1	0	0	3	4	19	21	48
AGTGTTGTAGGGCCGAACTTATCGTTCCAGGCCCCATGC	40	2	2	4	0	0	0	48
GGTGTCGTAGAGGCCGAACTCATCGTTCCAGGCCCCGTGC	0	0	2	7	5	13	21	48
TGAGTGTAGGGCCAAACTCATCGTTCCAGGCCCCGTGC	3	3	1	16	5	6	14	48
GAGTCGTAGGGCCGAACTCATCGTTCCAGGCCCCAGTGC	6	0	3	14	9	10	6	48
GGGTGTTGTCGGGCCGAACTCATCGTTCCAGGCCCCGTGC	0	2	2	12	6	12	14	48
GGTGTCGTAGGGCCGAACTCATCGTTCCAGGCCCCGGG	0	1	0	7	7	15	18	48
GGAGTTGTAGGGCCGAACTCATCGTTCCAGGCCCCGTG	3	1	3	9	8	9	15	48
AGTGTTGTAGGGCCGAACCCATCGTTCCAGGCCCCATGC	11	5	11	20	1	0	0	48
GGTGTCGTAGGGCCGAACCTCGTCCATGCCCAGGCCGCG	0	0	1	2	1	26	18	48
GAATGTCGTAGGGCCGAACTCATCGTTCCAGGCCCCGTGC	7	1	7	8	11	10	4	48
GTGAGTCGTAGGGCCGAACTCATCGTTCCAGGCCCTCGTGC	0	0	0	11	7	20	9	47
GGTGTTGTAGGGCCGAACTCAGTCGTTCCAGGCCCCGTGC	6	2	3	7	22	2	5	47
GATGTGTGTAGGGCCGAACTCATGTTCCAGGCCCCGTGC	31	1	3	8	2	2	0	47
GGTGTCGTAGGGCCGAAGCTATCGTTCCAGGCCCCGTGC	0	1	1	6	12	12	15	47
AGTGTTGTAGGGCCGAACTCATCGATTCCCAGGCCCCGTGC	14	10	9	11	2	1	0	47
GTGTCGTAGGGCCGAACTCATCGTTTCCAGGCCCCGTGC	0	0	0	11	10	12	14	47
GGTGTCGTAGGGCCGAACTCATCGTTTCCAGGCCCCGTGCC	0	1	0	6	7	8	25	47
GGATGGTCGTAGGGCCGAACTCATCGTTCCAGGCCCCGTGC	1	3	3	11	6	8	15	47
GGGTGTCGTGGGGGCCGAACTCATCGTTCCAGGCCCCGTGC	0	0	2	14	18	6	7	47
GAGTTGTCGTAGGGCCGAACTCATCGTTCCAGGCCCCGTGC	7	0	5	24	6	2	3	47
AGTGTTGTAGGGCCGAAACTCATCGTTCCAGCCCCGTGC	21	5	5	13	2	0	1	47
GGTGTCGTAGGGCCGAACTCATCGTTCCAGGCCCCGTAGCC	1	0	4	7	15	9	11	47
GGTGTCGTAGGGCCGAACCATCATCCTGCCCAGGCCGCG	1	0	0	3	7	20	16	47
GAGTGCGTAGGGCCGAACTCATCGTTCCAGGCCCCGTGT	4	0	3	25	12	3	0	47
TGAGTTGTGGGGCCGAACTCATCGTTCCAGGCCCGGTGC	44	1	0	1	0	0	0	46
GATGCGTTGGACGGCAACTCATCGTTCCAGGCCCCGTGC	15	0	0	20	4	6	1	46
GTGTGTCGTAAGGCCGAACTCATCGTTCCAGGCCCCGTGC	1	0	1	9	4	13	18	46
TGAGCTGTAGGCCGAACTCATCGTTCCAGGCCCCGTGC	6	4	4	18	2	9	3	46
GGTGTCGTAGGGCCGAACCATCATTCCTGCCCGGCCGCG	0	0	0	3	9	18	16	46
AGTGGTCGTAGGGCCGAACTCATCGTTCCAGGCCCCGTGC	13	3	11	12	4	3	0	46
AGTGTGTGGGGCCGAACTCATCGTTCCAGGCCCCGTGC	9	3	9	18	0	5	2	46
GAGTGTCGTAGGGCCGGAACTCATCGTTCCAGGCCCCGTGC	4	1	6	20	6	5	4	46
GAGATGTTGTAGGGCCGAACTCATCGTTCCAGGCCCCGTGC	7	3	3	23	5	4	1	46
GGAGTTGTAGGGCCGAACTTATCGTTCCAGGCCCCGTGC	5	3	3	4	5	16	10	46
AGTGTGTACGGGCCGAACTCATCGTTCCAGGCCCCGTGC	11	5	7	18	2	2	1	46
GGAGCTGTAGGGCCGAACTCATCGTTCCAGGCCCCGTGC	0	0	0	7	10	21	8	46
AGTGTGTAGGGCCGAACTCATCGTTCCAGGCCCCGCGC	19	9	2	13	2	1	0	46
TGATGTTGTAGGGCCGAACTCATCGTTCCAGGCCCGTGC	16	0	1	18	1	5	5	46
GGTGTCGTAGGGCCGGAACTCATCGTTCCCAGGCCCCGTGC	1	0	4	4	5	11	21	46
ATGAGTTGAGGGCCGAACTCATCGTTCCAGGCCCCGTGC	16	3	1	15	5	2	4	46
GGGTGTCGGTAGGGCCGAACTCATCGTTCCAGGCCCGTGC	0	0	1	1	17	16	11	46
GGATGTCGTAGGGCCGAACTCATCGTTCCAGGCCCCGTCCG	1	1	0	10	5	12	17	46
GGTGTCGTAGGGGCCGAACTCATCGTTCCAGGCCCCGTG	1	0	0	5	9	20	10	45
GTGTCGGTAGGGCCGAACTCATCGTTCCAGGCCCGTGC	1	1	0	4	8	10	21	45
GGGTGTCGTAGGGCTAACTCATCGTTCCAGGCCCCGTGC	0	0	2	5	12	6	20	45
TGAGTTGTAGGGCCGAACCTCATCGTTCCCAGGCCCCGTGC	2	1	6	11	5	8	12	45
GAGTGTTGTGGGGCCGAACTCATCGTTCCAGGCCCCGTGC	13	3	6	18	2	3	0	45
GGTGTCGTAGGGCCGAACCTCGTCCTGCCCAGCCGTCG	0	0	0	1	3	23	18	45
TGAGTGTAGGGCCGAACTCATCGTTCCAGGCCCTGTGC	0	1	1	8	9	15	11	45
GTGAGTCGTAGGGCCGAACTCATCGTTCCAGGCCCCGGTGC	1	0	0	8	2	18	16	45
GTGTCGGTAGGCCGAACTCATCGTTCCAGGCCCCGTGC	1	0	1	3	7	14	19	45
AGTGTTCTAGGGCCGAACTCATCGTTCCAGGCCCCATGC	37	3	1	4	0	0	0	45
TGAGTGTAAGGCCGAACTCATCGTTCCAGGCCCCGTGC	1	1	0	15	2	12	13	44
GGGTGTCGTAGGGCCGAACTCATCGTTCCAGGCCCCGGTC	0	0	0	5	17	7	15	44
GGTGTCGTAGGGCCGAACTCATCCGGTTCCAGGCCCCGTGC	0	1	2	8	5	12	16	44
TGAGTTGTAGGGCCGAACTCATCGTTCCAGGGGCCCCGTGC	2	0	3	11	6	9	13	44
GGTGTCGTAGGGCCGAACTCATCGATTCCAGGCCCCTGTGC	1	2	1	5	6	16	13	44
AGTGGGTTGTAGGGCCGAACTCATCGTTCCAGGCCCCGTGC	16	4	4	18	1	1	0	44
GGTGTCGTAGGGCCGAACTATCGTTCCAGGCCCCGGTGC	0	1	1	4	5	18	15	44
GGTGTCGTAGGGCCCGAATCATCGTTCCAGGCCCCGTGC	2	0	2	12	2	4	22	44
GGTGTACGTAGGCCGAACTCATCGTTCCAGGCCCCGTGC	1	0	3	2	5	15	18	44
GGTGTCGTAGGGCCGAACTCATCGTTCCCAGGCCCGTGT	0	0	5	7	13	11	8	44
GTGATGTCGTAGGGCCGAACTCATCGTTCCAGGCCCACGTGC	0	0	0	7	1	21	14	43
AGTGTTGTAGGGCCGAACTCATCGTTCCAGACCCGTGC	19	6	5	12	0	1	0	43
GTGAGTGTAGGGCCGAACTCATCGTTCCAGGCCCGTCGC	0	0	2	5	4	14	18	43
GAAGCGAAACAGGGCGCACCCATCGTGCCAGCCCGTCCTG	43	0	0	0	0	0	0	43
GGTGTCGTAGGGCCGAACTCATCGTTCCAGGCCCCGTCGTC	0	0	0	0	4	20	19	43
GAGGTGCGTAGGGCCGAACTCATCGTTCCAGGCCCCGTGC	0	0	0	6	7	14	16	43
GTGAGTTGTAGGGCCGAACTCATCCGTTCCAGGCCCCGTGC	1	1	5	10	1	4	21	43
GGTGTCGTAGGGCCGAACTCATCGTTCCAGGCCCTGCG	0	0	2	3	4	17	17	43
AGAGTTGTAGGGCCGAACTCATCGTTCCAGGCCCCAGTGC	11	1	3	11	8	6	3	43
GGTTGTTGTAGGGCCGAACTCATCGTTCCAGGCCCCGTGC	3	3	5	17	7	4	4	43
AGTGTTGTAGGCCGAACTCATCGTTCCAGGCCCCATGT	36	1	1	5	0	0	0	43
GGTGTTGTAGGGCCGAACTCATCGTTCCAGGCCCCGTC	3	0	0	9	19	9	3	43
TGAGTGTAGGTCGGCAACTCATCGTTCCAGGCCCCGTGC	6	1	4	24	1	4	3	43
TGAGTGTAGGGCCGAACACATCGTTCCAGGCCCCGTGC	0	1	2	13	1	12	14	43
GGTGTCGTAGGGCCGAACTCATCGTTCCAAGGCCCCGTGGC	1	2	0	4	5	7	24	43
GGGTGTCGTAGGGCCGAACCCATCGTTCCAGCCCCGTGC	0	0	2	6	6	6	23	43
AGTGTATGGACGGCAACTCATCGTTCCAGGCCCCGTGC	25	2	3	11	1	0	1	43
GAGTGTGTAGGGCCGAACTTCATCGTTCCAGGCCCCGTGC	9	1	1	17	4	8	3	43
GGTGTCGTAGGGCCGAACCTCATCGTGCCCAGCCGTCG	0	0	0	5	1	26	11	43
GGTGCGTAGGGCCGAACTCATCGTTCCAGGCCCCGTCG	0	0	1	5	9	21	7	43
GAGTGTCGTCGGGCCGAACTCATCGTTCCAGGCCCCGTGC	2	0	1	16	7	11	6	43
GGTGTCGTAGGGCCGAACCATCGTCCATGCCCGCTGCG	0	0	0	1	10	22	10	43
AGTGTTGTAGGGCCGAACTCATCGTTCCAGGCCTTGTGC	31	2	3	5	1	1	0	43
GAGTATTGTAGGGCCGAACTCATCGTTCCAGGCCCCGTGC	22	3	7	6	3	1	0	42
AGTGTGTAGGGCCAAACTCATCGTTCCAGGCCCCGTGC	15	1	7	14	0	5	0	42
TGAGTTGTAGGGCCGAACTCATCGTTCCCAGGCCCGTCGC	3	1	3	7	11	9	8	42
AGTGCTGTAGGGCCGAACTCATCGTTCCAGGCCCCGTG	26	4	5	6	0	1	0	42
AGTGTGTAGGGACCGAACTCATCGTTCCAGGCCCCGTGC	12	1	7	18	4	0	0	42
AGAGTTGTAGGGCCGAACTCATCGTTCCAGGCCCTCGTGC	12	7	1	11	5	1	5	42
GTGAGTGTAGGGCCGAACTCATCGTTCCAGGCCCCGTACCG	4	1	2	12	5	12	6	42
GGTGTCGTAGGGACCGAACTCATCGTTCCAGGCCCCGTG	0	0	0	3	10	16	13	42
AGAGTTGTAGGGCCGAACTCATCGTTCCAGGCCCCGCCC	32	1	1	3	2	3	0	42
AGTGTTGTAGGGCCGAACCCATCGTTCCAGCCCCGCTGC	16	4	7	13	0	2	0	42
AGAGTTGTAGGGCCGAACTCATCGTTCTAGGCCCCGTGC	22	1	5	10	0	3	1	42
GGTGTTGTAGGGCCGAACTCATCGTTCCAGGCCCGGTG	25	11	3	2	0	0	1	42
GGTGTCTAGGGCCGAAACTCATCGTTCCAGGCCCCGTGC	0	0	0	14	4	9	15	42
GGGTGTCGTAGGGCCGAACTCATCGTTCCAGGCCCCGTTC	1	0	4	12	10	7	8	42
GAGTGTTGTAGGGCCGAACTCATCGTTCCAGGCCCCGTCG	17	1	4	18	1	0	1	42
GTGTGTGTTAGGGCCGAACTCATCGTTCCAGGCCCCGTGC	4	0	1	13	4	9	11	42
GAGTGTGTAGGGCCGAACTCATCGTTCCAGGCCCCGTGA	0	0	0	36	3	3	0	42
GAGTGTGTAGGACGCGAACTCATCGTTCCAGGCCCCGTGC	3	1	2	18	4	6	8	42
AGTGTTGTAGGGCCGAACTCATCGTTCCAGGCCCCGTTTGC	13	4	6	15	3	0	0	41
TGAGTTTGTAGGGCCGAACTCATCGTTCCCAGGCCCCGTGC	3	0	5	8	9	2	14	41
AGTGTGTAGGGCGGAACTCATCGTTCCAGGCCCCGTGC	13	4	5	16	2	0	1	41
GAGTGTCGTAGGGCCGAACTCATCGTTCCAGGCCCCTGTGC	8	0	7	17	5	1	3	41
GGGTGTCGTAGGGCCGAAATCATCGTTCCAGGCCCCGTGC	1	0	2	10	5	14	9	41
TGAGTGTAGGGCCGAACTCATCGTTCCAGGCCCGGTGC	15	0	2	10	2	6	6	41
GGGTGTCGTAGGGCCGAACTCATCGTTCCCAGGCCCCGTGCC	0	1	2	4	9	12	13	41
GGTGTCGTAGGGCCGAAACTCATCGTTCCGGCCCCGTGC	1	0	2	5	3	15	15	41
GCGAGTCGTAGGGCCGAACTCATCGTTCCAGGCCCCGTGC	4	0	1	11	6	10	9	41
GGTGTGCGTAGGGCCGAACTCATCTTCCAGGCCCCGTGC	1	0	0	2	10	12	16	41
GTGAGTTGTAGGGCCGAACTTATCGTTCCAGGCCCCGTGC	8	1	2	10	9	4	7	41
GATGTCCGTAGGGCCGAACTCATCGTTCCAGGCCCCGTGC	4	0	1	1	14	7	14	41
GGGTGTCGTAGGGCCGAACTCATCGTTCCAGGCCCCCGGTGC	0	0	2	9	3	8	19	41
TGAGTTGTAGGGCCGGGAACTCATCGTTCCAGGCCCCGTGC	3	0	6	9	9	5	9	41
GGTGTCGTAGGGCCGGAACTCATCGTTCCAGGCCCCGTG	2	2	2	6	4	10	15	41
GATGTCGTAGGGCCAACTCATCGTTCCAGGCCCCGTGC	2	1	3	9	6	11	9	41
GTGTGTCGTAGGGCCGAACTCATCGTTCCAGGCCCCGCGC	4	1	3	15	3	7	7	40
AGAGTTGTAGGGCCGGAACTCATCGTTCCAGGCCCCGTGC	10	4	4	13	4	2	3	40
GAGTGTGTAGGGCCGAACTCATCGTTCCAGGCCCCGCG	6	1	2	20	4	5	2	40
GGTGTCGTAGGGCCGAACCTCGTCCATGCCCAGCCTGTCG	0	0	1	2	5	9	23	40
AGTGTCGTAGGGCCGAACTTCATCGTTCCAGGCCCCGTGC	10	6	1	13	4	2	4	40
AGTGTTGTGGGGCCGAACTCATCGTTCCAGGCCCGTGC	18	3	7	8	1	3	0	40
GTGTGTCATAGGGCCGAACTCATCGTTCCAGGCCCCGTGC	0	0	1	16	3	13	7	40
AGAGTTGTAGGGCCGAACTCATCGTTCCAGGCTCCGTGC	11	2	1	12	6	7	1	40
GGTGCGTAGGCCGAAACTCATCGTTCCAGGCCCCGTGC	0	0	1	6	3	13	17	40
GTGTGTCGTAGGGCCGAAGCTCATCGTTCCAGGCCCCGTGC	4	0	1	13	1	14	7	40
AGTGTGCAGGGCCGAACTCATCGTTCCAGGCCCCGTGC	29	3	2	5	1	0	0	40
GGTGTCGTAGGGCCGAACTCATCGTCCAGGCCCCTTGC	1	1	1	8	5	10	14	40
GGTGTCGTAGGGCCGAACTCATCGTTCCAGGCCCCAGTCGC	0	0	2	10	2	14	12	40
GTGAGTGTAGGGCCGAACTCATCGTTGCCAGGCCCGTGC	0	0	2	3	7	12	15	39
GGATGTCGTAGGGCCGAACTCATCGTTCAGGCCCCGTGC	0	2	0	9	4	12	12	39
GGATGTCGTAGGGCCGAACACATCGTTCCAGGCCCCGTGC	0	0	0	10	3	15	11	39
AGTGTCGTAGGGCCGAACTCATCGTTCCAGGCCCCGTCCG	19	0	4	13	3	0	0	39
AGTGTTGTAGGGCGAACTCATCGTTCCAGGCCCCCGTGC	16	5	6	12	0	0	0	39
GTGTGTCGTAGGGCCGAACTCATCGTTCCAGGCCCGGTGC	7	0	2	14	3	7	6	39
GGTGTCGTAGGCCGTAACTCATCGTTCCAGGCCCCGTGC	0	0	2	9	1	9	18	39
TGAGTTGTAGGGCCGAACACATCGTTCCAGGCCCCCGTGC	5	0	3	17	5	3	6	39
GGTGTCGTAGGGCCGAAACTCATCGTTCCCAGGCCCGTGC	0	1	0	2	4	22	10	39
AGTGTTGTAGGGCCGAACTCATCGTTTCCCAGGCCCCGTGC	12	2	8	12	3	2	0	39
AGTGTTGTAGGGCCGAACTCATCGTTCCAGGCCCCGTGCCCC	23	1	5	9	0	1	0	39
TGAGTTGTAGGGCCGAACTCATCGTTCCAGGTTCCGTGC	0	0	0	36	1	0	2	39
CGAGTGTAGGGCCGAACTCATCGTTCCAGGCCCCGTGC	11	0	1	9	2	12	4	39
GTGTGTGTAGGGCCGAACTCATCGTTGCCAGGCCCCGTGC	1	0	0	12	3	12	11	39
AGTGTTTGTAGGGCCGAACTCATCGTTCCAGGCCCGGTGC	36	0	2	1	0	0	0	39
GGTGTCGTAGGGCCGAACTCATCGTTCCAGGCCCCAGTGCC	0	1	3	7	5	13	10	39
AGTGTTGTAGGGCCGAACCCATCGTTCCAGGCCCTGTGC	36	1	1	1	0	0	0	39
GTGAGTACTAGGGCCGAACTCATCGTTCCAGGCCCCGTGC	1	0	0	4	7	16	11	39
GAGTGCGTAGGGCCGAACTCATCGTTCCAGGCCCCGTACG	1	0	1	22	8	4	2	38
GGTGTCGTAGGGCCGAACTCATCGTTCCAGGCCCCAGTCG	1	0	2	4	4	18	9	38
GGGTGCGTAGGGCCGAACTCATCGTTCCAGGCCCGTGC	0	0	1	7	9	10	11	38
GATGTGTCGTAGGGCCGAAGCTCATCGTTCCAGGCCCCGTGC	5	0	1	13	5	13	1	38
ATGGTGCGTAGGGCCGAACTCATCGTTCCAGGCCCCGTGC	1	0	1	6	7	11	12	38
AGTGTTGTAAGGGCCGAATCATCGTTCCAGGCCCCGTGC	18	3	1	10	3	1	2	38
ATGAGTTGTAGGGGCCGAACTCATCGTTCCAGGCCCCGTGC	5	2	3	22	4	1	1	38
AGTGTTTGTAGGGCCGAACTCATCGTTCCAGGCCCCGTGT	26	2	2	4	4	0	0	38
GAGATCGTAGGGCCGAACTCATCGTTCCAGGCCCCGTGC	2	0	1	13	6	7	9	38
GGTGTCGTAGCGGCAACTCATCGTTCCAGGCCCCGTGC	0	0	0	2	0	18	18	38
GTGTGTCGTAGGGCCGAACTCATCGTTCCAGGCCCCGGTGC	3	1	0	13	1	12	8	38
GAGTGTCGTAGGGCCGAACTCATCGTTCCAGGCCCCGGCG	3	3	3	19	3	4	3	38
AGTGTTGTCGGGCCGAACTCATCGTTCCAGGCCCCGTAC	8	4	9	13	4	0	0	38
TGAGTTGTAGGGCCGAACTCATCGTTCCAGGCCCCCCCGTGC	2	0	3	7	11	4	11	38
GGTCGTCGTAGGGCCGAACTCATCGTTCCAGGCCCCCGTGC	0	1	2	1	5	17	12	38
GGACCCATGCAGTAGCCAGTGTGGACTGGGCTGCCCCC	38	0	0	0	0	0	0	38
GACGTGTCGTAGGGCCGAACTCATCGTTCCAGGCCCCGTGC	21	0	1	9	2	4	0	37
GGTGTCGTAGGGCCGAAACTCATCGTCCAGGCCCGTGC	0	0	0	8	7	14	8	37
AGTGTTCTAGGGCCGAACTCATCGTTCCAGGCCCCGTGT	27	0	1	7	2	0	0	37
GAGTGTGTAGGGCCGAACTCATCGTTCCCAGGCCCGTGC	5	0	5	17	3	6	1	37
GAGTGTTCGTAGGGCCGAACTCATCGTTCCAGGCCCGTGC	8	2	2	20	2	3	0	37
GGTGTCGTAGGGCCGAACCTCGTTCCATGCCCGGCCGCG	0	1	0	3	2	9	22	37
GGTGGTCGTAGGCCGAACTCATCGTTCCAGGCCCGTGC	2	1	0	7	6	12	9	37
GAGTGTGTAGGGCCGAACTCATCGTTCCAGGCCCCTTGC	3	6	7	15	6	0	0	37
TGAGTTGTTTAGGGCCGAACTCATCGTTCCAGGCCCCGTGC	3	1	4	10	7	3	9	37
TGAGTTGTAGGGCCGAACTCATCGATCCAGGCCCCGTGC	5	0	2	4	7	9	10	37
TGAGTTGTGGGGGCCGAACTCATCGTTCCAGGCCCCGTGC	8	2	3	13	8	1	2	37
AGTGTTGTAGGGCCGAACTCATCGTTCCAGGCCCCGTTCG	22	2	1	6	0	1	4	36
GGTGTCGTAGGGCCGGAACTCATCGTTGCCAGGCCCCGTGC	2	0	1	5	4	15	9	36
GGGTGTCGTAGGGCCGAACTCATCGTTCCAGGCCCCCGTGGC	0	0	1	7	10	6	12	36
AGTGTTGTTGGGCCGAACTCATCGTTCCAGGCCCCATGC	33	1	0	2	0	0	0	36
GGGTGTCGTAGGGCCGAACTCATGGTTCCAGGCCCCGTGC	0	0	0	13	8	6	9	36
GTGCGTGGTACGGCAACTCATCGTTCCAGGCCCCGTGC	1	0	0	5	7	12	11	36
AGTGTCGTAGGGCCGAACTCATCGTTCCCAGGCCCGTGC	9	3	5	7	5	4	3	36
GGAGTTGTAGGGCCGAACTCATCGTTCCAGGCCCCGTGCC	2	0	0	4	7	12	11	36
AGTGTGTAGGGCCTAACTCATCGTTCCAGGCCCCGTGC	17	1	5	11	1	0	1	36
AGAGTTGTAGGGCCGAACTCATCGTTCCAGGCCCGTGT	23	0	2	7	2	1	1	36
GTGAGTCGCTAGGGCCGAACTCATCGTTCCAGGCCCCGTGC	0	1	1	4	6	10	14	36
AGTGTTGTAGGGCCGAACTCATCGGTTCCCAGGCCCCGTGC	13	2	3	3	12	2	1	36
TGAGTTGTAGGGCCGAACTCATCGGGTTCCAGGCCCCGTGC	2	0	3	11	6	4	10	36
TGAGTGGTAGGCCGAACTCATCGTTCCAGGCCCCGTGC	1	0	1	10	5	8	11	36
GGGTGTCGTAGGGCCGAACTCATCGTTCCAGGCCCCGCCCC	15	1	1	10	6	1	2	36
GGTCGTCGTAGGGCCGAAACTCATCGTTCCAGGCCCCGTGC	0	0	1	2	4	15	14	36
GGTGTCGTAGGGCCGAATCATCGTTCCAGGCCCCGTTGC	1	0	3	3	4	5	20	36
AGTGTTGTAGGGCCGAACTCATCGTTCCAGGCCCCCGCG	19	2	0	14	1	0	0	36
GAGTCGTAGGGCCGAACCCATCGTTCCAGGCCCCGTGC	0	1	5	13	5	4	8	36
TGAGTTGTAGGGACGAACTCATCGTTCCAGGCCCCGTGC	1	2	1	7	5	2	18	36
GGGTGTCTTAGGGCCGAACTCATCGTTCCAGGCCCCGTGC	1	0	2	11	12	3	7	36
GGTGCGTAGGGCCGAAACTCATCGTTCCAGGCCCCGTG	1	0	0	3	5	16	10	35
GGGTGTCGTAGGGGCCGAACTCATCGTTCCAGGCCCCGTGCC	1	0	3	6	6	8	11	35
ACTGTTGTAGGGCCGAACTCATCGTTCCAGGCCCCGTGT	29	0	1	5	0	0	0	35
GGTCGTTGTAGGGCCGAACTCATCGTTCCAGGCCCCGTGC	5	4	4	12	7	3	0	35
GGTGTCGTAGGGCCGAACTCATCTTCCAGGCCCCGTGCC	0	0	0	0	6	12	17	35
GTGACGTGGTACGGCAACTCATCGTTCCAGGCCCCGTGC	0	1	0	3	11	8	12	35
GGGTGTTGTAGGGCCGAACTCATCGTTCCAGGCCCGTGC	4	2	5	9	6	5	4	35
TGAGTTGTAGGGCCGAACTCATCGTTCCAGCCCCCGTGC	0	1	1	15	9	2	7	35
TGAGTTGTAGGGCCGAACTCATCGTTCCAGCACCCGTGC	6	0	5	8	4	3	9	35
GGTGTCGTAGGGCCGAACTCATCGTTCCCAGGCCCTGTGC	1	2	0	0	5	16	11	35
AGAGTTGTCGGGCCGAACTCATCGTTCCAGGCCCCGTGC	2	2	2	11	2	9	7	35
GGTGTCGTAGGGCCGAACTCATTGTTCCAGGCCCCGTG	8	6	1	6	5	7	2	35
TGAGTTGTAGGGCCGAACTCATCGTTCCCAGGCCCCGTAC	7	4	3	9	1	3	8	35
GGTGTCGTAGGGCCGAACTTCATCGTTCCAGGCCCCGTG	0	0	1	5	2	8	19	35
TGAGTTGTAGGGCCGAACTCATCGTTCCAGGCCCCGTGCCCC	2	1	3	12	7	4	6	35
TGAGTCGTAGGGCCGAACTCATCGTTCCAGGCCCCGTGT	12	1	2	17	2	0	1	35
GTGGGTCGTAGGGCCGAACTCATCGTTCCAGGCCCCGTGC	1	1	1	2	4	11	14	34
TGAGTGTAGGGCCGAACTCATCGTTCCAGGCCCCGGGC	1	2	1	10	6	7	7	34
GGTGTGCGTAGGGCCGAACTCATCGTTCCAGGCCCCGTG	1	0	0	18	2	4	9	34
GTGAGTTGTAGGGCCGAACTCATCGTTCCAGGCCCCGGTGC	3	0	1	13	0	5	12	34
GAGTGTCGTAGGGCCGAACTCATCGTTTCCAGGCCCCGTGC	3	1	4	16	3	7	0	34
GATGTCGTAGGGCCGAACTCATCGTTCCAGGCCCCGTAGC	1	1	4	10	6	8	4	34
GAGTGTGTAGGGCCGAAACTCATCGTTCCCAGGCCCCGTGC	3	2	9	11	7	2	0	34
TGAGTTGTAGGGGCCAACTCATCGTTCCAGGCCCCGTGC	1	0	5	8	0	7	13	34
GGTGTCGTAGGGCCGAACCTCATTCCGTGCCCAGCCGCG	0	0	0	6	3	6	19	34
GGGTGTCGTAGGGCCGAACTCATCGTTCCCAGGCCCCGTG	1	0	1	5	3	10	14	34
TGAGTTGTAGGGCCGAATCATCGTTCCCAGGCCCGTGC	5	1	0	5	7	5	11	34
GGTGTCGTAGGGCCGAACTCATCGTTCCAGGCCCCATCGC	1	0	0	5	5	12	11	34
GTGATGTGTAGGGCCGAACTCATCGTTCCAGGCCCCGGTCG	0	0	1	4	5	11	13	34
GGTGGTCGTAGGGCCGGAACTCATCGTTCCAGGCCCCGTGC	2	1	1	5	7	6	12	34
GATGTGTCGTAGGGCCGAACTCATCGTTCCAGCCCGTGC	2	0	3	17	3	7	2	34
TGAGTTGTAGGGCCGAACTCATCGTTCCAGGCCCCGCC	10	2	2	7	4	4	5	34
AGTGTGTAGGGCCGAACTCATCGTTCCAGGCCTCGTGC	17	0	7	9	0	0	1	34
GGTGTCGTAGGGCCGAACCTCATTCCATGCCCGCCGTCG	0	0	0	2	5	18	9	34
ATTGTGTTGTAGGGCCGAACTCATCGTTCCAGGCCCCGTGC	10	7	5	9	1	1	0	33
ATGTGTTGAGGGCCGAACTCATCGTTCCAGGCCCCGTGC	10	2	0	16	1	3	1	33
GGTGTCGTAAGGGCCGAACTCATCGTTCCAGGCCCCAGTGC	1	2	2	6	8	5	9	33
GTGTCGTTAGGGCCGAACTCATCGTTCCAGGCCCCGTGC	1	0	2	6	4	9	11	33
GGTGTGTCGTAGGGCCGAACTCATCGTTCCAGGCCCCGTACG	2	0	3	11	2	4	11	33
GGTGTCGTAGGGCCGAACTCATCGTTCCAGGCCCCCGTGTC	0	0	3	6	3	5	16	33
AGTGTGTAGGGCCGAACTCATCGTTCCAAGCCCCGTGC	13	1	4	14	0	1	0	33
AGTGTTGTAGGGCCGAACTCATCGTTCCCAGGCCCCGTAGC	12	2	4	11	2	2	0	33
GGTGCGTAGGGCCGAACTCATCGTTCCAGGCCCCGTGTC	0	1	1	3	7	6	15	33
AGTGTTGTAGGGCCGAACTCATCGTTCCCCCAGGCCCCGTGC	17	4	6	4	2	0	0	33
AGAGTTGTAGGGCCGAACTCATCGTTCCAGGCCCCCTGC	11	4	1	11	4	0	2	33
GTGTGTGCTAGGGCCGAACTCATCGTTCCAGGCCCCGTGC	1	1	2	7	2	10	10	33
GGTGTCGTAGGGCCGAACTCATCGTTCCAGGCCCCGTCTG	14	1	1	11	2	4	0	33
GGTGTCGTAGGGCCGAATCATCGTTCCCAGGCCCCGTG	0	0	0	6	2	13	12	33
AGTGTTGTAGGGCCCAACTCATCGTTCCAGGCCCCGTGC	20	2	2	5	0	0	4	33
GATGTCGTAGGGACCGAACTCATCGTTCCAGGCCCCGTGC	0	0	0	12	2	8	11	33
AGTGTTGTAGGGACCGAACTCATCGTTCCCAGGCCCCGTGC	11	2	5	12	1	0	1	32
GAGTGCGTAGGGCCGAACTCATCGTTCCAGGCCCCATGC	4	0	2	10	10	2	4	32
GGTGTCGTAGGGCCGAATCATCGGTTCCAGGCCCCGTGC	0	1	4	4	2	9	12	32
AGAGTTGTAGGGCCGAACTCATCGTTTCAGGCCCCGTGC	15	1	2	4	5	5	0	32
GAGTGTCGTAGGCGGAACTCATCGTTCCAGGCCCCGTGC	5	1	2	21	3	0	0	32
GAGTGTCAGTAGGGCCGAACTCATCGTTCCAGGCCCCGTGC	2	0	2	19	4	4	1	32
GATGTCGTAGGGCCGAACTCATCGTTCCAGGCCCCGTGGC	1	1	4	6	6	10	4	32
AGTGTTGTAGGGCCGAACTCATCGTTCCAGGCCCGCGC	14	5	2	5	5	1	0	32
TGAGTGTGGTACGGCAACTCATCGTTCCAGGCCCCGTGC	6	0	1	11	5	8	1	32
GGTGGTCGTAGGGCCGAACTCATCGTTCCAGGCCCCAGTGC	0	1	1	5	6	8	11	32
GGGTGTCGTAGGGCCGAACTCATCGTCCAGGCCCCGTG	3	0	1	3	3	12	10	32
GTGAGTTGTAGGGCCGAACCCATCGTTCCAGGCCCCGTGC	1	2	4	7	4	1	13	32
AGTGTGTAGGGCCGAACTCATCGTTCCAGGCCCTGTGC	12	0	0	15	0	4	1	32
AGAGTTATAGGGCCGAACTCATCGTTCCAGGCCCCGTGC	5	0	1	17	2	2	5	32
GGTGTCGTAGGGCCGAATCATCGTTCCAGGCCCCGTAGC	0	1	2	6	4	4	14	31
GGGTCTCGTAGGGCCGAACTCATCGTTCCAGGCCCCGTGC	10	0	1	7	4	5	4	31
TGGATGTCGTAGGGCCGAACTCATCGTTCCAGGCCCCGTGC	1	1	0	8	1	11	9	31
TGAGTTGTAGGGCCGAACTCATCGTTCCAGGCCCCGTGGCC	2	0	2	8	4	5	10	31
AGTGTTGTAGGTCCGAACTCATCGTTCCAGGCCCCGTGC	16	2	6	6	1	0	0	31
TGAGTCGTAGGGCCAACTCATCGTTCCAGGCCCCGTGC	1	0	0	6	1	13	10	31
AGTGTTGCAGGGCCGAACTCATCGTTCCAGGCCCCGTGT	14	13	1	3	0	0	0	31
GAGTGTGTAGGGCTGAACTCATCGTTCCAGGCCCCGTGC	5	1	2	15	3	3	2	31
GAGTGCGTAGGGCCGAACTCATCGTTCCAGGCCCCGTAC	6	7	3	8	4	2	1	31
GGGTGTTGTAGGGCCGAACTCATCGTTCCAGGCCCCGTGCC	3	1	3	8	8	3	5	31
ATGAGTTGTAGGGCCGAACTCATCGTCCAGGCCCCGTGC	5	1	1	13	4	4	3	31
GATGTCGTAGGGCCGAACTCACGTTCCAGGCCCCGTGC	2	0	0	3	9	10	7	31
GGAGTGTGTAGGGCCGAACTCATCGTTCCAGGCCCCCGTGC	4	1	2	15	5	4	0	31
GAGTGTCGTAGGGCCGAACTCATCGTTCCAGGCCCCTTGC	1	3	4	13	6	4	0	31
GTGTGTCGTAGGGCCGAACTCATCGTTCCAGGCCCCTG	1	1	0	13	1	8	7	31
TGAGTTGTAGGGCCGAACTCATCGTTCCAGGCCCCGGGTGC	1	0	0	8	5	8	9	31
GGTGTCGTAGGGCCGAACTCATCGTTCCAGGCCCCATGTC	2	2	1	6	2	15	3	31
GGATGTCGTAGGGCCGAACTCATCGTTCCAGGCCCCGTCG	0	1	0	8	4	11	6	30
TGTGTTGTAGGGCCGAACTCATCGTTCCAGGCCCCGTG	18	1	2	9	0	0	0	30
AGAGTTGTAGGGCCGAACTCATCGTTCCAGGCCCCCGTGCC	8	3	8	9	1	1	0	30
GGTGTCGTAGGGCCGAACTCATCGATTCCAGGCCCCAGTGC	1	0	1	3	5	9	11	30
AGTGTGTAGGGCCGAACTCATCGTCCCAGGCCCCGTGC	6	4	4	9	6	1	0	30
GGTGTCGTAGGGCCGCGGAACTCATCGTTCCAGGCCCCGTGC	0	0	1	7	3	6	13	30
TGAGTTGTAGGGCCGAACTCATCGTTCCAGGCCCCCGTGT	10	1	0	13	2	3	1	30
GGTGTCGTAGGGCCGAACTCATCGTTCCAGGCCCCGTTGCC	0	2	0	2	8	7	11	30
GTGTGTCGTAGGGCCGAACTCATCATTCCAGGCCCCGTGC	1	0	1	7	4	13	4	30
AGTGTCGTAGGGCCGACTCATCGTTCCAGGCCCCGTGC	7	2	8	6	2	3	2	30
AGAGTGTAGGGCTGAACTCATCGTTCCAGGCCCCGTGC	4	4	5	13	0	1	3	30
GGTGTCGTAGGGCCGAACTCATCGTTCCAGGCCCCTGCCG	0	0	2	3	4	14	7	30
TGTGTTGTAGGGCCGAACTCATCGTTCCAGGCCCCATGC	17	0	1	10	1	1	0	30
GGAGTTGTAGGGCCAGAACTCATCGTTCCAGGCCCCGTGC	2	0	1	3	5	8	11	30
GGTGTTGTAGGGCCGAACTCATCGTTCCGAGCCCCGTG	4	1	2	13	1	4	5	30
ATGAGTTGTAGGGCCGAAACTCATCGTTCCAGGCCCCGTGC	8	2	1	14	1	0	4	30
GAGTGTCGTAGGGCCAACTCATCGTTCCAGGCCCGTGC	0	0	3	20	2	3	2	30
GGTGATCGTAGGGCCGAACTCATCTTCCAGGCCCCGTGC	0	0	1	4	4	14	7	30
GAGTCGTAGGGCCGAACTCATCGTTCCAGGCCCCGTAC	2	8	3	7	4	5	1	30
GTGTCCGTAGGGCCGAACTCATCGTTCCAGGCCCCGTGC	0	0	0	7	8	7	8	30
TGAGTTGTAGGGCCGAACTCATCGTTCCAGCACCGTGC	3	1	4	11	3	4	4	30
GGTGTCGTAGGGCGAACTCATCCGTTCCAGGCCCCGTGC	0	0	0	5	4	5	16	30
GGTGTCGTAGGGCCGAACATCATCGTCCAGGCCCCGTGC	2	1	2	1	6	8	9	29
GGTGTCGTAGGGCCGAACTCATCGGTTCCAGGCCCCGGTGC	0	0	1	6	0	6	16	29
GGATGTCATAGGGCCGAACTCATCGTTCCAGGCCCCGTGC	0	0	0	11	6	9	3	29
GTGAGTCGTAGGGCCGAACTCATCGTTCCAGGCCCCAGTGC	0	0	0	6	2	11	10	29
GTGATGTCGTAGGGCCGAACTCATCGTTCCAGGCCCCGTGGC	1	0	1	4	4	8	11	29
AGTGTTGTAGGGCCGAACTCATCGTTCCAGGCCCTTGC	10	3	6	8	1	1	0	29
GGGTGTCGTAGGGCCGAATCATCGTTCCCAGGCCCCGTGC	0	0	1	2	5	10	11	29
GTGAGTCGTAGGGCCGAACTCATCGTTCCAGGCCCCTG	0	0	1	5	3	8	12	29
AGTGTCGTAGGGCCGAACTCATCGTTCCAGGCCCCTGCG	3	0	9	12	2	2	1	29
GGTGTCGTAGGGCCGAACCTCTTCCGATGCCCAGCCGTCG	0	0	0	6	0	11	12	29
GTGATGTGTAGGGCCGAACTCATCGTTCCAGGCCCGTCGC	0	0	0	6	3	12	8	29
GGTGTCGTGGGCCGAACTCATCGTTCCCAGGCCCCGTGC	1	0	2	1	5	7	13	29
GGGTGTTGTAGGGCCGAACTCATCGTTCCAGGCCCCGTAC	2	5	8	5	3	4	2	29
GAGTGTCGTTGGGCCGAACTCATCGTTCCAGGCCCCGTGC	0	1	0	13	3	10	1	28
AGTGTTTGTAGGGCCGAACTCATCGTTCCAGGCCCCATGC	11	2	9	3	3	0	0	28
AGTGTTGTAGGGCCGAACTCATCGTTCCAGGCCCGGTGCC	22	1	1	3	1	0	0	28
GGTGTCGTAGGGCCGAACTTATCGTTCAGGCCCCGTGC	5	0	1	2	6	9	5	28
GGTGTCGTAGGGCCAAACTCATCGTTCCAGGCCCCGTG	1	0	1	0	1	14	11	28
TGTGTTGTAGGGCCGAACTCATCGTTCCAGGCCCCGTGCC	14	4	0	8	0	1	1	28
GGTGTCGTAGGGCCGAATCATCCGTTCCAGGCCCCGTGC	0	0	0	5	6	11	6	28
TGAGTTGTAGGGCCGAAACCCATCGTTCCAGGCCCCGTGC	2	3	3	12	1	4	3	28
TGAGTTGTAGGGCCCAACTCATCGTTCCAGGCCCCGTGC	2	0	1	7	3	6	9	28
AGTGTTGTAGGGCCGAACTCATCGTTCCAGGTCCCCGTGC	21	2	1	2	0	1	1	28
GGTGTCGTAGGGCCGAACCTCGTCCATGCCCAGGCCTGTCG	0	0	0	2	3	11	12	28
GTGATGTTGTAGGGCCGAACTCATCGTTCCAGGCCCCCGTGC	0	0	2	17	1	3	5	28
GAGTGACGTAGGGCCGAACTCATCGTTCCAGGCCCCGTGC	1	1	0	13	4	6	3	28
GGTGTCGTAGGGCCGAAACTCATCGTTCCCAGGGCCCCGTGC	0	0	0	3	1	11	13	28
GTGACTGGTACGGCGAACTCATCGTTCCAGGCCCCGTGC	0	0	1	6	8	2	11	28
GATGCGTAGGGCCGAACTCATCGTTCCAGGCCCCATGT	24	0	4	0	0	0	0	28
AGTGTTGTCGGGCCGAACTTATCGTTCCAGGCCCCGTGC	11	8	5	3	0	1	0	28
AGAAGTTGTAGGGCCGAACTCATCGTTCCAGGCCCCGTGC	8	1	4	9	5	1	0	28
GGTGGTCGTAGGGCCGAACTCATCGTTCCAGGGCCCCGTGC	0	0	2	6	6	6	8	28
GGTGTGTGTAGGGCCGAACTCATCGTTCCAGGCCCGTGC	0	0	0	12	3	7	6	28
AGTGTTGTAGGGCCGAACTTATCGTTCCAGGCCCCGTG	24	2	0	2	0	0	0	28
GGGTGTCGTAGGGCCGAACTCATCGTTCCAGGCCACGTGC	0	1	1	6	4	6	9	27
TGAGTTGTAGGGCCGAACTCATTCGTTCCAGGCCCCCGTGC	3	1	3	12	2	1	5	27
GTGTGTCGTAGGGCCGAACTCATCGTTCCAGGCCCCGTAC	3	0	2	10	8	3	1	27
GGTGTCGTAAGGGCCGAACTCATCGTTCAGGCCCCGTGC	0	1	1	2	3	8	12	27
GGTGTCGTAGGCCGAACCTCATCGTTCCAGGCCCCGTGC	0	0	0	5	3	11	8	27
GTGTCGTAGGGCCGAACTCATCGTTCCAGGCCCCGTTGC	1	0	1	3	3	8	11	27
GGTGTCGTAGGGCCGAACCTCATTCCTGCCCAGCCGTCG	0	0	1	2	2	14	8	27
TGAGTGTAGGGCCGAACTCATCGTTCCAGGCCTCGTGC	2	0	2	5	2	6	10	27
AGCGTTGTAGGGCCGAACTCATCGTTCCAGGCCCCGTGT	23	0	0	4	0	0	0	27
GGTGTCGTAGGGCCGAACCTCGTCCATGCCCGCCTGTCG	0	0	0	0	2	17	8	27
TGAGTTGTAGGGCCGAACCCATCGTTCCAGGCCCCATGC	5	1	3	7	1	0	10	27
TGAGTTGCAGGGCCGAACTCATCGTTCCCAGGCCCCGTGC	4	0	1	6	3	2	11	27
GAGTGTCGAGGGCCGAACTCATCGTTCCAGGCCCCGTGC	5	2	0	10	2	8	0	27
TGTGTTGTAGGGCCGAACTCATCGTTCCAGGCCCGGTGC	19	2	6	0	0	0	0	27
GGTGTCGTAGGGCCGAAACTCATCGTTACCAGGCCCCGTGC	1	0	1	2	2	9	12	27
GGTGTCGTAGGGCCGAACTCATCGTTCCAAGGCCCCGTAGC	0	1	1	3	2	10	10	27
AGTGTTGTAGGGTTGAACTCATCGTTCCAGGCCCCGTGC	20	1	3	1	2	0	0	27
AGAGTTGTAGGGTCGAACTCATCGTTCCAGGCCCCGTGC	8	3	5	2	0	6	3	27
GGGTGTCGTAGGGCCCGAACTCATCGTTCCAGGCCCCGTGCC	0	0	0	3	5	10	9	27
AGTGTCGTAGGGCCGAACTCATCGTTCCAGGCCCCGTA	7	1	4	12	3	0	0	27
CGAGTTGAAGGGCCGAACTCATCGTTCCAGGCCCCGTGC	15	2	0	2	0	8	0	27
TGAGTTGGTAGGCCGAACTCATCGTTCCCAGGCCCGTGC	2	2	2	5	6	2	8	27
GGTGTCGTAGGGCCGAACTCATCGTCCAGGCCCGGTGC	4	0	4	3	5	5	6	27
TGAGTTGTAGGGCCGAACTCATCGTTCCATGCCCCGTGC	0	0	2	12	0	4	9	27
TGAGTGTAGGGCCGAACTCATCGTTCCAGGCCCCGTCC	0	0	1	4	2	3	17	27
GATGTGTGTAGGGCCGAACTCATCGTTCCAGGCCCCTGTCG	4	2	2	12	3	2	2	27
GGATGTCGTAGGGCCGAACTCATTGTTCCAGGCCCCGTGC	14	0	0	4	2	6	1	27
GGTGTCGTAGGGCCGAACTCATCGTTCCAGGCCCCAGCG	0	1	0	1	3	11	11	27
GTGAGTGTAGGGCCAACTCATCGTTCCCAGGCCCCGTGC	0	1	0	6	3	4	12	26
GGTGTCATAGGGCCGAACTCATCGTTCCAGGCCCCGTG	0	0	1	7	4	6	8	26
TGAGCTGTAGGGCCGAACTCATCGTTCCAGGCCCGTGC	3	2	6	4	7	1	3	26
GGTGTCGTTAGGGCCGAACTCATCGTTCCAGGCCCCGTGCC	1	0	2	5	3	4	11	26
TGAGTCGTAGGGCCGAACTCATCGTTCCAGGCCCCGTG	1	0	1	6	3	7	8	26
GGTGCGTAAGGGCCGAACTCATCGTTCCAGGCCCGTGC	0	0	1	4	4	11	6	26
GGTGTCGTAGGGCCGAACCTCGATCTGCCCAGGCCGCG	1	0	0	4	0	10	11	26
GATGTCTGGTACGGCGAACTCATCGTTCCAGGCCCCGTGC	3	2	2	13	4	1	1	26
GGATGTCGTAGGGCCGAACTCATCGTTCCAGGCCCCGTAC	1	1	1	7	5	8	3	26
AGTGTTGTAGGCCGAACTCATCGTTCCAGGCCCCTGTGC	11	1	4	10	0	0	0	26
AGTGTGTAGGGCCGAACTCATCGTTCCAGGCCCCCGTGCC	8	2	5	9	0	2	0	26
GGTGGTCGTAGGGCCGAACTTATCGTTCCAGGCCCCGTGC	0	2	0	9	9	2	4	26
GGTGTCGTAGGGCCGAACATCATCGTTCCAGGCCCCGTG	0	0	1	5	6	6	8	26
TGAGTAGTAGGCCGAACTCATCGTTCCAGGCCCCGTGC	6	0	2	12	1	1	4	26
GGTGTCGTAGGGCCGAACTCATCGTTCCAAGGGCCCCCGTGC	1	0	2	2	2	11	8	26
GATGTGTGTAGGGCCGAACTCATCGTTCCAAGGCCCCGTGC	0	0	3	12	4	4	3	26
GGGTGCGTAGGGCCGAACTCATCGTTCCAGGCCCCGTG	0	0	1	2	7	5	11	26
GATGTGTGTAGGGCCGAACTCATCGTTCCAGGCCCCGTCGC	1	1	3	7	5	7	2	26
AGTGTTGTAGGGCCGAACTCATTTTCGTTCCAGGCCCCGTGC	8	3	5	6	1	3	0	26
GGTGTCGGTAGGGCCGAACTCACGTTCCAGGCCCCGTGC	0	0	0	1	2	14	9	26
GAGTGTCGTAGGGCCGAACTCATCGTTCCAGGCCCCGTGGC	5	0	2	12	3	2	2	26
AGTGTCGCTAGGGCCGAACTCATCGTTCCAGGCCCCGTGC	7	1	6	6	4	2	0	26
AGTGTTGTAGGGCCGAACTGATCGTTCCAGGCCCCGTGC	19	1	3	3	0	0	0	26
AGTGTTCTAGGGCCGAACTCATCGTTCCAGGCCCCGTAC	19	2	3	2	0	0	0	26
AGTGTTGTAGGGCCGAACTCATTGTTCCAGGCCCCATGC	10	4	2	8	0	0	2	26
GGTGTCGTAGGGCCCGAACTCATCGTCCAGGCCCCGTGC	0	0	0	9	4	10	3	26
GGGTGTCGTAGGGCCGAACTCATCGTTCCAGGCCCCGTCCT	2	1	1	4	5	4	9	26
GAGTGTGTAGGGCCGAACCTCATCGTTCCAGGCCCCGTGC	2	0	2	14	4	3	1	26
AATGTTGTAGGGCCGAACTCATCGTTCCAGGCCCCATGC	16	3	5	1	1	0	0	26
GTGTGTCGTAGGGCCGAACTCATCGTTCCAAGCCCCGTGC	1	0	0	10	2	9	4	26
TGAGTTTGTAGGGCCGAATCATCGTTCCAGGCCCCGTGC	2	2	0	6	5	1	10	26
GTGATGTCGTAGGGCCGAACTCATCGTTCCAGGCCCCGT	2	0	0	2	2	11	9	26
AGTGTGTAGGGCCGAACTCATCGTTCCAGGCCCCTTGC	11	3	2	7	2	1	0	26
TGAGTTGTAGGCCGAACTCGATCGTTCCAGGCCCCGTGC	2	0	3	4	3	4	10	26
GGATGTCGTAGGGCCGAACCCATCGTTCCAGGCCCCGTGC	0	0	0	11	7	7	1	26
AGTGTTGTAGGGCGTGAACTCATCGTTCCAGGCCCCGTGC	13	1	4	4	3	1	0	26
GGGTGTCGTAGGGCCGCAACTCATCGTTCCAGGCCCCGTGC	1	1	3	6	3	5	7	26
GGAGTTGTAGGGCCGAACCTCATCGTTCCAGGCCCCGTGC	1	0	3	6	2	4	10	26
GGAGTCGTAGGGCCGAACTCATCGTTCCCAGGCCCCGTGC	0	0	3	4	3	7	9	26
AGTGTTGTAGGGGCCGAACTCATCGTTCCCAGGCCCCGTGC	9	6	5	2	4	0	0	26
GGATGTCGTAGGGCCGAACTCATCGTTGCCAGGCCCCGTGC	2	0	2	3	3	8	8	26
AGTGTTGTAGGGCCGAACTCATTTGTTCCAGGCCCCGTGC	15	5	2	3	1	0	0	26
GAGTGTCGTAGGACCGAACTCATCGTTCCAGGCCCCGTGC	4	0	0	12	3	7	0	26
GGTGTCGTAGGGCCGAACCATCGTTCCATGCCCGCCTGCG	0	0	0	1	4	12	9	26
GTGTCGTAGGGCCGAACTCATCGTTCCAGGCCACCGTGC	0	0	1	3	0	12	9	25
GGTGTCGTAGGGCCGAACTCATCGTTCCAGGCCCCTCCC	1	0	0	0	2	5	17	25
GAGTGTCGTAGGGCCGAACTCATCGTTCCAGGCCCCGTCC	0	0	0	15	6	1	3	25
GGATGTCGTAGGGCCGGAACTCATCGTTCCAGGCCCCGTGC	0	0	0	3	12	4	6	25
GAGTCGTAGGGCCGAACTCATCGTTCCAGGCCCCGTCCG	2	0	1	8	8	6	0	25
GGGGTGTCGTAGGGCCGAAACTCATCGTTCCAGGCCCCGTGC	0	1	2	7	4	6	5	25
AGTGTTGTAGGACCGAACTCATCGTTCCAGGCCCCCGTGC	11	5	3	5	1	0	0	25
GGTGTCGTAGGGCCAACTCATCGTTCCAGGCCCCGTCG	1	0	0	4	3	9	8	25
AGTGTTGTGGGGCCGAACTCATCGTTCCAGGCCCCGTAC	8	4	6	7	0	0	0	25
GTGATGTCGTAGGGCCGAACTCATCGTTCCAGGCCCCGTCC	0	0	0	5	3	4	13	25
AGTGTTGTAGGGCCGAACTCATCGTTCCAGCCCCGTGCC	11	4	1	8	1	0	0	25
AGTATTGTAGGGCCGAACTCATCGTTCCAGGCCCCGTGT	14	2	3	6	0	0	0	25
AGTGTTGTAGGGCCGAACCATCGTTCCAGGCCCCGTGC	12	2	4	4	0	3	0	25
AGATGTTGTAGGGCCGAACTCATCGTCCAGGCCCCGTGC	8	1	0	15	0	1	0	25
GTGGTCGTAGGGCCGAACTCATCGTTCCCAGGCCCCGTGC	0	1	1	7	3	6	7	25
GGGTGTCGTAGGGCCAAAACTCATCGTTCCAGGCCCCGTGC	3	2	1	3	3	8	5	25
GGTGTCGTAGGGCCGAACTCATCGTTGCCAAGGCCCCGTGC	0	0	2	3	3	9	8	25
GGATGTCGTAGGGACCGAACTCATCGTTCCAGGCCCCGTGC	0	0	1	3	3	11	7	25
GGTGTTGTAGGGCCGAACTCATCGTTCCAGGCCCCGTGAC	1	2	5	12	3	1	1	25
GGTGTCGTAAGGGCCGAACTCATCGATTCCAGGCCCCGTGC	0	0	1	2	2	11	9	25
GATGTCGTAGGGCCGAACTCATCGTTTCCAGGCCCCGTGC	3	1	0	0	3	5	13	25
TGAGTTGTAGGGCCGAACCTCATTCCTGCCCGGCCGCG	2	0	0	10	0	6	7	25
GTGTGTGTAGGGCCGAAACTCATCGTTCCCAGGCCCCGTGC	2	0	0	10	1	5	7	25
GGTGTCCGTAGGGCGAACTCATCGTTCCAGGCCCCGTGC	0	0	1	3	4	4	13	25
GGTGTCGTAGGGCCGAAACATCATCGTTCCAGGCCCCGTGC	1	1	0	1	6	8	8	25
GAGTGTTGCAGGGCCGAACTCATCGTTCCAGGCCCCGTGC	10	4	3	6	0	1	1	25
GGTGTCGTAGGGCCGAACTCATCGTGCCCAGGCCCGTG	1	0	0	4	1	12	7	25
AGAGTTTGTAGGGCCGAACTCATCGTTCCAGGCCCCCGTGC	11	1	2	10	0	0	1	25
AGTGTTGGTAGGGCCCGAACTCATCGTTCCAGGCCCCGTGC	10	2	4	8	0	0	0	24
TGAGTGTAGGACCGAACTCATCGTTCCAGGCCCCGTGC	1	0	0	7	2	8	6	24
GGTGTCGTAGGGCCGAAGCTCATCGTTCCAGGCCCCGTCGC	0	1	0	0	6	7	10	24
GGTGTCGTAGGGCCGAACTCGATCGTTCCAGGCCCCGTCGC	0	0	2	0	3	10	9	24
GAGTGTCGTAGGGCCGAACTTATCGTTCCAGGCCCCGTGC	3	0	2	11	5	2	1	24
GAGTCGTAGGGCCGAACATCATCGTTCCAGGCCCCGTGC	2	0	1	7	6	5	3	24
GGTGGTCGTAGGGCCGAACTCATTGTTCCAGGCCCCGTGC	12	1	0	3	1	4	3	24
AGAGTTGTAGGGCCGAACTCATCGTTCCAGGCCCCGGGC	1	0	1	15	3	3	1	24
AAGTGTTTGTAGGGCCGAACTCATCGTTCCAGGCCCCGTGC	11	1	3	2	7	0	0	24
GGTGTCGTAGGGCCGAACTCATCGTTCCAGGGCCCCGTAGC	0	0	2	4	2	5	11	24
AGAGTTGTAGGGCCGAATTCATCGTTCCAGGCCCCGTGC	9	2	0	7	0	1	5	24
TGACTGTAGGGCCGAACTCATCGTTCCAGGCCCCGTGC	6	1	1	8	4	3	1	24
GAGCGTTGGACGGCAACTCATCGTTCCAGGCCCCGTGC	6	0	1	12	1	3	1	24
AAAAGTGTTGTAGGGCCGAACTCATCGTTCCAGGCCCCGTGC	7	6	6	3	0	1	1	24
TGAGTTGAAGGGCCGAACTCATTGTTCCAGGCCCCGTGC	23	0	0	1	0	0	0	24
GATGTGCGTAGGGCCGAACTCATCGTTCCAGGCCCCGTG	3	0	0	15	2	2	2	24
GGTGTCGTAGGGGCCGAACTCATCGTTCCAGGTCCCGTGC	0	0	2	0	7	5	10	24
AGTGTGGGTAGGGCCGAACTCATCGTTCCAGGCCCCGTGC	5	4	5	6	4	0	0	24
GGTGTGGAGGGCCGAACTCATCGTTCCAGGCCCCGTGC	0	0	0	4	6	5	9	24
GGTGTCGTAGGGCCGAACTCATCGTTCAGGCCCCATGC	0	0	1	2	6	8	7	24
GGTCGTCGTAGGGCCGAACTCATCGTTCCCAGGCCCCGTGC	0	0	1	7	4	3	9	24
AGGAGTTGTAGGGCCGAACTCATCGTTCCAGGCCCCGTGC	8	0	2	7	2	2	3	24
TGAGTTGTAGGGCCGAACTAATCGTTCCAGGCCCCGTGC	3	0	1	6	3	1	10	24
AGTGTGTTGGGCCGAACTCATCGTTCCAGGCCCCGTGC	7	4	5	8	0	0	0	24
GGGTGTTGTAGGGCCGAACTCATCGTTCCAGGCCCCATGC	7	4	5	4	4	0	0	24
GAGTCTAGGACGGCGAACTCATCGTTCCAGGCCCCGTGC	2	0	2	16	1	3	0	24
GGTGTCGTAGGGCCGAACCTCTCCGATGCCCAGCCGTCG	0	0	0	5	0	14	5	24
GGTGTCGTAGGGCCGAACTCATTCCGTTCCAGGCCCCGTGC	0	1	0	4	0	11	8	24
GGTGTCGTAGGGCCGAAACTCATCGTTCCCAGGCCCCGTGCC	0	0	0	1	1	6	16	24
CGAGTTGTAGGCCGAACTCATCGTTCCAGGCCCCGTGC	9	2	0	5	4	1	3	24
GTGTTGTAGGGCCGAACTCATCGTTCCAGGCCCCCGTGC	11	1	3	6	0	1	2	24
GGTGTCGTAGGGACCGAACCCATCGTTCCAGGCCCCGTGC	0	0	0	5	3	6	10	24
AGTGTTGTAGGGCCGAACTTCATCGTTCCAGGCCCCCGTGC	12	1	2	7	0	1	0	23
ATGTGTTGTAGGGCCGAACTCATCGTTCCAGGCCCCATGC	7	0	1	14	0	1	0	23
GATGTCGTGGCGGCAACTCATCGTTCCAGGCCCCGTGC	5	0	1	8	4	4	1	23
GAGTGTGTAGGGCCGAACTCATCGTTCCAGGCCCCCTG	5	0	1	13	1	3	0	23
AGTTGTAGGGCCGAACTCATCGTTCCAGGCCCCCGTGC	13	2	2	2	2	2	0	23
AATGTGTCGTAGGGCCGAACTCATCGTTCCAGGCCCCGTGC	13	1	1	6	2	0	0	23
GGGTGCGTAGGGCGAACTCATCGTTCCAGGCCCCGTGC	0	0	0	6	2	7	8	23
AGTGTATAGGGCCGAACTCATCGTTCCAGGCCCCGTGC	10	2	2	5	2	2	0	23
ATGAGTTGTAGGGCCGAACTCATCGTTCCAGGCCCCGTGCC	5	0	1	13	2	1	1	23
GGTGTCGTAGGGCCAACTCGATCGTTCCAGGCCCCGTGC	0	0	1	4	5	2	11	23
ATGGAGTTGTAGGGCCGAACTCATCGTTCCAGGCCCCGTGC	2	0	6	9	3	1	2	23
GGGTGTTGTAGGGCCGAACCTCATCGTTCCAGGCCCCGTGC	0	0	5	10	1	2	5	23
AATGTTGTAGGGCCGAACCCATCGTTCCAGGCCCCGTGC	3	2	7	8	1	0	2	23
GGTGTCGTAGGGCCGAACTCATCGTTCCAGCCCCGTCG	0	0	0	2	5	9	7	23
AAGTGTTGTAGGCCGAACTCATCGTTCCAGGCCCCGTGC	8	3	5	6	1	0	0	23
TGAGTTGTAGGGCCGAAACTCAATCGTTCCAGGCCCCGTGC	3	1	1	6	3	4	5	23
TGAGTGTGGGGCCGAACTCATCGTTCCAGGCCCCGTGC	1	1	4	9	4	1	3	23
GGTGTCGTAGGGCCGAACCCAATCGTTCCAGGCCCCGTGC	1	0	0	4	4	5	9	23
GGTGTCGTAGGGCCGAACTCATCGTTCCAGCCCCGTGGC	1	0	1	4	2	6	9	23
GAGTGCTGGTAGGGCCGAACTCATCGTTCCAGGCCCCGTGC	9	1	4	4	4	1	0	23
GAGTCGTTGGACGGCAACTCATCGTTCCAGGCCCCGTGC	9	1	1	7	3	0	2	23
GGAGTCGTAGGGCCGAACTCATCGTCCAGGCCCCGTGC	1	0	1	3	6	6	6	23
GGGTGCGTAGGGCCGAACTCATCGTTCCAAGGCCCCGTGC	0	1	0	1	5	6	10	23
GGTGTTGTAGGGCCGAACTCGATCGTTCCAGGCCCCGTGC	4	2	4	5	2	4	2	23
GGGTGAGTTGTAGGGCCGAACTCATCGTTCCAGGCCCCGTGC	0	0	0	9	4	4	6	23
GGGTGTCGTAGGGCCGAACTCATCGTTCCAGGCCCCCGTAGC	1	0	1	7	2	5	7	23
GTGTGTCGTAGGACCGAACTCATCGTTCCAGGCCCCGTGC	0	0	1	6	1	5	10	23
GGTGTCGTAGGGCCGAACTCATCGTTCCCAGGCCCCCGGTGC	0	0	3	2	2	5	11	23
GGTGTCGTAGGGCCGAACCTCATCCGATGCCCAGCCGTCG	0	0	0	1	1	11	10	23
GGATGTCGTAGGGCCGAACTCATCGTTCCAAGCCCCGTGC	0	0	0	2	3	9	9	23
AGAGTTGTAGGGCCGAACTATCGTTCCAGGCCCCGTGC	7	1	4	6	2	1	2	23
GGTGTCGTAGGGCCGAACTCATCGTCCAGGCCCCGTCC	0	0	1	2	5	9	6	23
TGAGTTGTAGGGCCGAACCCATCGTTCCAGGCCCCGTG	5	0	0	10	2	2	4	23
AGAGTTGTAGGGCCGAACTCATCGTTCCAGGTCCCGTGC	6	0	3	7	1	0	6	23
TGAGTTGTAGGCCGAACTCATTCGTTCCAGGCCCCGTGC	3	0	2	7	0	4	7	23
GGGAGTTGTAGGGCCGAAACTCATCGTTCCAGGCCCCGTGC	0	0	0	5	2	7	9	23
GGTGTCGTAGGGCCGAACTCATCCGTTCCAGGCCCCGTAGC	0	0	1	2	3	7	10	23
TGAGTGTAGGGCCGAACTCATCGTTCCAGGCCCCGCGC	4	0	3	7	4	2	3	23
GGTGTCGGTAGGGCCGAACTCATCGTCCCAGGCCCGTGC	0	0	1	5	5	7	5	23
GGGACCTATGCAGTAGCCAGTGTGGACTGGGCTGCCCCCCC	23	0	0	0	0	0	0	23
GGGTGTTGGTAGGGCCGAACTCATCGTTCCAGGCCCCGTGC	7	1	3	6	2	2	2	23
AGTGTTCTAGGGCCGAACTTATCGTTCCAGGCCCCGTGC	20	3	0	0	0	0	0	23
GTGTGTGTAGGGCCGAACTCATCGTTCCAGGCCCCGGCG	0	0	0	9	1	6	7	23
GTGTGTCGTAGGGCCGAACTCATCGTTCCAGGCCCCAGTGC	1	0	2	9	1	5	5	23
AGTGTTGTAGGGCCGAACTCATCGATTGCCAGGCCCCGTGC	11	4	1	7	0	0	0	23
GTGTGTGTAGGGCCGAACTCATCGTTCCAGGCCCGTCGC	1	0	0	6	5	8	3	23
GGTGTCGTAAGGCCGAACTCATCGTTCCAGGCCCCGTG	0	0	0	4	1	14	4	23
GTGAGTCGTAGGGCCGAACTCATCGTTCCAGGCCCCGTAGC	0	0	0	4	2	8	8	22
GAGTGTTGTAGGGCCGAACTCATCGTTCCAGGCCCTGTGC	9	2	0	2	5	0	4	22
GAGTCGTAGGACGGCGAACTCATCGTTCCAGGCCCCGTGC	2	1	2	8	5	3	1	22
GGGTGCGTAGGCCGAACTCATCGTTCCAGGCCCCGTGC	0	1	2	3	0	5	11	22
GTGTTCGTAGGGCCGAACTCATCGTTCCAGGCCCCGTGC	2	0	1	2	3	6	8	22
GGTGTCGTAGGGCCGAACTCATCGTTCCCAGGCCCCGTGTC	0	0	1	5	4	3	9	22
GATGTCGTAGGGCCGAACTCATCGTTCCAGGCCCCGTA	6	0	0	8	2	4	2	22
GTGATGTCGTAGGGCCGAACTCATCGTCCCAGGCCCGTGC	0	0	0	0	1	10	11	22
GGTGTGGTAGGGCCGAACTCATCGTTCCAGGCCCCGCTGC	0	1	1	1	2	7	10	22
GATGTCGTGGACGGCGAACTCATCGTTCCAGGCCCCGTGC	2	0	1	2	10	7	0	22
GAGTATTGGACGGCAACTCATCGTTCCAGGCCCCGTGC	3	0	0	15	3	0	1	22
AGTGTCGTAGGGCCGAACTCATCGTTCCGGCCCCGTGC	10	3	2	5	1	1	0	22
GTGTGTCGTAGGGCCGAACCCATCGTTCCAGGCCCCGTGC	1	0	0	13	1	2	5	22
AGTGTTGCAGGGCCGAACTCATCGTTCCAGGCCCGTGC	12	3	2	3	0	2	0	22
GATGTGTGTAGGGCCGAACTCATCCGTTCCAGGCCCCGTGC	2	0	3	7	3	4	3	22
GGGTGTCGTAGGGCCGAACTCATCGTTCCAGGCCCCGTGCCC	1	0	3	7	4	3	4	22
GTGAGTCGTAGGGCCGAACTCATCGTTCCCAGGCCCCCGTGC	0	0	0	3	5	5	9	22
AGAGTTGTAGGGCCGAACTCATCGTTCCAGGCCCAGTGC	1	3	1	13	0	0	4	22
TGAGTTGCTAGGGCCGAATCATCGTTCCAGGCCCCGTGC	2	0	5	5	2	0	8	22
GGTGCGTAGGGCCGAACTCATCGTTGCCAGGCCCCGTG	0	0	0	6	3	9	4	22
AGTGTTTGTAGGGCCGAACTCATCGTTCCAGGCCCGTGC	12	1	2	5	2	0	0	22
ATGAGTTGTAGGGCCGAACTCATCGTTCCAGGCCCCGTGTC	13	0	0	6	2	0	1	22
GACTGCGTAGGGCCGAACTCATCGTTCCAGGCCCCGTGC	6	0	1	11	2	2	0	22
AGTGTGTAGGGCCGAACTCATCGTTCCAGGCCCCGTGA	2	0	0	19	0	1	0	22
GAGTGTCGTAGGGCCCGAACTCATCGTTCCAGGCCCCCGTGC	2	0	3	9	3	3	2	22
AGTGTTGTCGGGCCGAACTCATCGTTCCAGGCCCCATGC	12	0	0	8	0	0	2	22
TGAGTCGTAGGGCCGAACTCATCGTTCCAGGCCCCATGC	4	0	1	12	0	2	3	22
ATGTGTTGTAGGGCCGAACTCATCGTTCCAGGCCCCGTGT	10	0	0	10	1	1	0	22
GGTGTGTCGTAGGGCCGAACTCATCGTTCCAGGCCCCGTGT	2	0	0	14	4	0	1	21
AGTGTCGTAGGCGCAACTCATCGTTCCAGGCCCCGTGC	5	1	2	9	2	2	0	21
GTGATGTCGTAGGGCCGAACTCATCGTTCCAGGCCCCTTGC	0	0	0	4	5	3	9	21
GCTGTCGTAGGGCCGAACTCATCGTTCCCAGGCCCCGTGC	1	0	2	5	2	3	8	21
GGTGTCGTAGGGCCGAACTCAATCGTTCCAGGCCCCAGTGC	2	0	0	3	6	4	6	21
GGTGTCGTAGGGCCGAACTCATCGTTCCAGGCCCTCGTGCC	0	0	2	2	0	12	5	21
GGGTGTCGTAGGGCCGAACTCATCGTTCCCAGGCCCCGTGT	1	1	0	4	4	6	5	21
GGTGTCGTAGGGCCAACTCATCGTTCCAGGCCCCGTTGC	0	0	0	2	5	6	8	21
TGAGTGTAGGGACCGAACTCATCGTTCCAGGCCCCGTGC	1	1	1	6	1	5	6	21
AGTGTGTAGGCCGAACTCATCGTTCCAGGCCCCGTAGC	4	2	5	8	1	0	1	21
GAGTCGTAGGGCCGAACTCATCGTTCCAAGGCCCCGTGC	2	2	0	3	4	7	3	21
GTGTGTCGTGGGGCCGAACTCATCGTTCCAGGCCCCGTGC	0	0	0	10	1	6	4	21
GGTGTTGTAGGGCCGAACTCATCGTTCCAGCCCCGCGC	4	2	0	12	1	2	0	21
GTGTCGTAGGCCGGAACTCATCGTTCCAGGCCCCGTGC	0	0	1	8	3	2	7	21
TGTGTTGTAGGGCCGAACCCATCGTTCCAGGCCCCGTGC	7	3	7	2	0	2	0	21
AGTGTATGGTACGGCAACTCATCGTTCCAGGCCCCGTGC	13	0	0	7	1	0	0	21
AGAGTTGTAGAGCCGAACTCATCGTTCCAGGCCCCGTGC	5	0	0	3	7	3	3	21
GGTGTCGTAGGGCCGAACTCATCGTTCCAGGCCCCCTC	0	0	0	3	0	4	14	21
TGATCGTAGGGCCGAACTCATCGTTCCAGGCCCCGTGC	0	1	1	6	3	5	5	21
AGTGTTGTAGGCCGAACTCATCGTTCCAGGCCCCGTTC	7	2	0	10	0	2	0	21
GGTGTCGTAAGGGCCGAACTCATTCGTTCCAGGCCCCGTGC	0	0	0	2	0	5	14	21
GAAGCGAAAACAGGGCGCACCCATCCGTGCCAGCCCCGTCTG	21	0	0	0	0	0	0	21
GGTGTCGTAGGGCCGAACTCATCGTTCCAGGCCCCGTAGGC	0	1	0	5	3	4	8	21
GATGTGTGTAGGGCCGAACTCATCGTTCCAGGCCCTCGTGC	3	0	1	10	1	5	1	21
GGATGTCGTAGGGCCGAACTCATCGTTCCAGGCCCTGTGC	0	0	1	3	1	10	6	21
GATGTGTCGTCGGGCCGAACTCATCGTTCCAGGCCCCGTGC	3	0	2	9	2	4	1	21
GGTGTCGTAGGGCCGAACTCATCGTTCCAGGCCCCGGCCG	0	0	0	2	7	7	5	21
GGGTTTGTCGTAGGGCCGAACTCATCGTTCCAGGCCCCGTGC	1	0	2	4	5	3	6	21
TCGAGTTGTAGGGCCGAACTCATCGTTCCAGGCCCCCGTGC	1	1	3	9	2	2	3	21
GGCGTCGTAGGGCCGAACTCATCGTTCCAGGCCCCGTG	13	1	1	1	1	3	1	21
GAGTGTGTAGGGCCGAACTCATCGTTCCAGGCCCGTGT	7	0	0	11	0	3	0	21
GGTGTTGTAGGGCCCGAACTCATCGTTCCAGGCCCCTGC	4	1	3	9	2	2	0	21
GGTGTCGGTAGGGCCGAACCCCATCGTTCCCAGGCCCCGTGC	0	0	0	0	21	0	0	21
AGTGTTGTAGGGGCCAACTCATCGTTCCAGGCCCCGTGC	15	2	0	4	0	0	0	21
GTGTCGTAGGGCCGAACTCATCGTTGCCCAGGCCCCGTGC	0	0	0	4	3	10	4	21
GAGTGTCGTAGGGCCGAACTCATCGTTCCAGGCCCCGAGC	1	1	2	10	2	3	2	21
AGTGTGTAGGACCGAACTCATCGTTCCAGGCCCCGTGC	3	1	3	10	1	0	2	20
GGTGTCGTAGGGCCGAACCTCATCCATGCCCGGCCTGTCG	0	0	0	1	8	7	4	20
GGTGTCGTAAGGGCCGAACTCACGTTCCAGGCCCCGTGC	0	0	2	3	3	4	8	20
GGTGTCGTAGGGCCGCAACTCATCGTTCCAGGCCCCGTCGC	0	1	0	2	4	5	8	20
TGATGTTGTAGGGCCGAACTCATCGTTCCAGGCCCCGTG	11	0	2	7	0	0	0	20
GTGAGTTGTAGGGCCGAACTCATCGTTCCAGGCCCCGTAGC	3	0	1	1	4	3	8	20
GTGATGTGTAGGGCCGAACCTCATCGTTCCCAGGCCCGTGC	0	0	2	4	2	4	8	20
AGTGTTGTAGGGCCGAACTCATTGTTCCAGGCCCCGTAC	10	5	3	1	0	0	1	20
AGTGTTGTAGGGCCGAACTCATCGTTGTCCAGGCCCCGTGC	10	3	2	3	1	0	1	20
AATGTTGTAGGGCCGAACTCATTGTTCCAGGCCCCGTGC	12	2	2	4	0	0	0	20
TGAGTTGTAGGGCCGAACTCATCGTTCCCCCAGGCCCCGTGC	3	2	2	5	3	1	4	20
GGGTGTCGTAGGGCCGAACTCATAGTTCCAGGCCCCGTGC	0	0	1	8	1	3	7	20
AGTGTTGTAGGGCCGAAACTCATCGTTCCAGGCCCCTGTGC	15	0	2	2	0	1	0	20
TGAGTTGTAGGGCCGAACCTCATTCCTGCCCAGCCGCG	4	0	4	7	0	0	5	20
GTGTCAGTAGGGCCGAACTCATCGTTCCAGGCCCCGTGC	0	1	2	1	3	8	5	20
AGTGTTGTAGGGCCGAACTCATCGTTCCAGGCCCCAGGT	19	1	0	0	0	0	0	20
GTGTGTCGTAGGGCCGAACTCATCGTTCCAGGCCCGTGCC	0	0	1	8	1	7	3	20
GGATGTGTGTAGGGCCGAACTCATCGTTCCCAGGCCCCGTGC	0	0	0	14	3	2	1	20
GGTGTCGTAGGGCCGAACTCAATCGTTCCAGGCCCCTGTGC	0	2	1	1	4	4	8	20
GGTGTTGTAGGGCACGAACTCATCGTTCCAGGCCCCGTGC	2	0	3	3	11	0	1	20
GGGTGTCGTAGGGCCGAACTCGTCGTTCCAGGCCCCGTGC	0	0	3	2	7	3	5	20
GAGTGCGTAGGGCCGAACTCATTGTTCCAGGCCCCGTGC	7	3	1	8	0	0	1	20
GGGTGTCGTAGGGCCGAACCCATCGTTCCCAGGCCCCGTGC	1	0	0	2	10	2	5	20
GGTGTCGTAGGGCCGAATCATCGTTCCAGGCCCCGGGC	1	1	1	4	2	5	6	20
GGAGTTGTAGGGCCGAACTCATCGTTCCAGGCCCCGTCC	0	0	0	10	4	1	5	20
TGAGTGTAGGGCCGAACTCATCGTCCCAGGCCCCGTGC	2	0	2	3	4	2	7	20
GGTGTCGTAGGGCCGAACTCATCGTCCCAGGCCCCGTG	1	0	0	2	4	6	7	20
GTGAGTCGTAGGGCCGTAACTCATCGTTCCAGGCCCCGTGC	0	0	0	3	4	4	9	20
GGGTGTTGTAGGGCCGAACTCATTGTTCCAGGCCCCGTGC	5	4	3	2	3	3	0	20
GGAGTTGTAAGGCCGAACTCATCGTTCCAGGCCCCGTGC	6	0	0	0	0	10	4	20
GGTGTCGTAGGGCCGAACTCATCGTTCCAAGGCCCCGTCG	0	0	0	0	2	6	12	20
AGATGTTGTAGGGCCGGAACTCATCGTTCCAGGCCCCGTGC	3	0	2	10	3	2	0	20
AGTGTCGTAGGGCCGAACTCATCGTTCCAGGCCCCGTCCT	5	0	0	6	0	9	0	20
GGTGTCGTAGGGCCGAACCTCATCCGTCCCAGGCCCGTCGC	0	0	0	2	10	5	3	20
TGATGTGTAGGGCCGAACTCATCGTTCCAGGCCCCGTGCC	0	0	0	3	0	9	8	20
GGTGTCGTAGGGCCGAACTCATCGTTCCAGCCCCGTACG	0	0	0	0	2	15	3	20
TGAGTTGTAGGGCCGAACTCATCATCCAGGCCCCGTGC	2	0	2	2	2	3	9	20
GTGTGTCGTAGGGCGAACTCATCGTTCCAGGCCCCGTGC	1	0	0	5	1	3	10	20
AGTGTGTAGGGCCGAAACTCATCGTTCCAGGCCCCGTG	13	1	0	5	0	1	0	20
GGTGTCGTAAGGGCCGAACTCATCGTTCCAGGCCCCTGTGC	0	0	0	5	1	7	7	20
GAGTGTCGTAGGGCCTAACTCATCGTTCCAGGCCCCGTGC	2	2	0	11	2	1	2	20
AGTGTGTAGGGCCGAAACTCATCGTTCCAAGGCCCCGTGC	6	2	0	10	1	1	0	20
GGTGTCGTAGGGCCGAAACTCATCGTTCCCAGGCCCCGGTGC	0	0	0	2	4	8	5	19
GATGTCGTAGGTCGGCAACTCATCGTTCCAGGCCCCGTGC	7	0	2	3	3	4	0	19
GTGTGTTGTAGGGCCGAACTCATCGTTCCAGGCCCCCGTGC	2	1	2	9	2	3	0	19
GGTGTCGTAGGGCCGAAGCTCATCGTTGCCAGGCCCGTGC	1	1	0	2	5	2	8	19
GTGTGACGTAGGGCCGAACTCATCGTTCCAGGCCCCGTGC	1	1	0	9	1	3	4	19
GGAGTTGTAGGGCCGAACTCATCGTTCCAGGCCCCGGTGC	1	0	0	6	2	8	2	19
AGTGTCGTAGGGCCGAACTCATCGTTCCAGGCCCCGTACC	6	4	2	6	1	0	0	19
AGTGTGTAGGGTCGAACTCATCGTTCCAGGCCCCGTGC	3	1	0	3	11	1	0	19
GGTGTCGTAGGGCCGAACTCACGTTTCCAGGCCCCGTGC	0	0	0	1	1	7	10	19
GGCGTGTCGTAGGGCCGAACTCATCGTTCCAGGCCCCGTGC	7	1	0	9	0	2	0	19
AGTGTTGTAGGGCCGAACTTTATCGTTCCAGGCCCCGTGC	15	1	1	1	1	0	0	19
GGTGTGTAGGGCCGAAACTCATCGTTCCAGGCCCCGTGC	4	1	2	3	5	2	2	19
GGTGTCGTAGGGCCGAACTCATCGTTCCAGGCCCCGAC	2	0	2	5	1	4	5	19
GAGTCTCGTAGGGCCGAACTCATCGTTCCAGGCCCCGTGC	18	0	1	0	0	0	0	19
GGTGTTGTAGGGCCGAACTCATCGTTCCAGGCCCTGCG	2	4	4	6	1	1	1	19
GGTTGTCGTAGGGCCGAAACTCATCGTTCCAGGCCCCGTGC	2	0	1	1	5	4	6	19
GAGTGTGTAGGGCCGTAACTCATCGTTCCAGGCCCCGTGC	1	0	0	8	7	1	2	19
GAGTGCGTAGGGCCGAAGCTCATCGTTCCAGGCCCCGTGC	0	0	0	8	4	3	4	19
TGAGTTGTAGGCCGAACTCATCGTTCCAGGCCCCGTGGC	0	0	3	6	1	2	7	19
GGTCGTCGTAGGGCCGAACCCATCGTTCCAGGCCCCGTGC	0	1	0	6	1	3	8	19
GGAGTTGTAGGGCCGAACTCATCGTTTCCAGGCCCCGTGC	0	0	0	4	1	6	8	19
AGTGTTGTAAGGGCCGAACTCATCGTTGCCAGGCCCCGTGC	11	3	2	2	1	0	0	19
GGGTGTCGTAGGGCCGAACTCATCGTTCCAGGCCCCTGGC	1	0	1	7	5	1	4	19
GTGAGTTGTAGGGCCGAACTCATCGTTCCAGCCCCGTGC	0	0	2	4	1	7	5	19
GGTGTCGGTAGGCCGAACCCATCGTTCCAGGCCCCGTGC	0	0	0	1	15	2	1	19
AGAGTTGTAGGGCCGAACTCATCGTTCCAGACCCCGTGC	4	1	4	5	2	3	0	19
GGTGTCGTAGGGCCGAACCTCATCGTGCCCAGGCCCGCG	0	0	0	2	0	12	5	19
GTGATCGTAGGGCCGAACTCATCGTTCCAGGCCCCGTCG	0	0	0	9	4	4	2	19
GAGTGTACTAGGGCCGAACTCATCGTTCCAGGCCCCGTGC	3	0	2	11	0	3	0	19
GATGTCGTAGGGCCGAACTCATCGTTCCAGGCCCCCGTGCC	2	0	2	7	2	3	3	19
GGGTGTTGTAGGGCCGAACTTATCGTTCCAGGCCCCGTGC	5	1	2	2	5	3	1	19
GTGTGTCGTAGGGCCGAACTCATCGTTCCAGGCCCGTGT	2	0	1	6	6	3	1	19
GTGAGTGTAGGGCCGAACTCTCGTTCCAGGCCCCGTGC	0	0	0	5	1	7	6	19
GGAGTCGTAGGGCCGAACTCATCGTTCCAGGCCCCGTG	0	0	0	3	4	7	5	19
GTGAGTTGTAGGGCCGAACTCATCGTTCCAGGCCCGGTGC	5	1	4	6	1	1	1	19
GGTGTCGTAGGACGGCAACTCATCGTTCCAGGCCCCGTGC	1	0	0	9	2	3	4	19
GGTGTCGTAGGGCCGAACCTCGTTCCATGCCCAGGCCTGTCG	0	0	1	1	0	5	12	19
GGATATCGTAGGGCCGAACTCATCGTTCCAGGCCCCGTGC	0	0	0	0	2	12	5	19
AGTGTGTAGGGCCGAACCCATCGTTCCAGGCCCCGCTGC	8	1	3	3	1	2	1	19
TGAGTGTAGGGCCTAACTCATCGTTCCAGGCCCCGTGC	3	0	1	3	2	2	8	19
GGTGTCGTAGGGCCGAACTCATCGTTCCAGGCCCCGTATC	0	0	0	2	2	7	8	19
GTGTGTGTAGGGCCGAACTTCATCGTTCCAGGCCCCGTGC	1	0	1	6	0	5	6	19
GGGTGTCGTAGGGCCGAACTCATCGTTCCAGGCCCCGTTCG	0	0	0	8	2	5	4	19
GTGAGTCGTAGGGCCGAACTCATCGTTCCAGGCCCGTGCC	1	0	1	3	2	5	7	19
TGAGTTGTAGGGCCGAACTCATCCTTCCAGGCCCCGTGC	8	0	1	2	1	1	6	19
GTGAGTTGTAGGGCCGAACTCATCGTTCCAGGCCCCGTCC	1	0	1	4	1	2	10	19
AGTGGTTGTAGGGCCGAAACTCATCGTTCCAGGCCCCGTGC	11	3	0	2	2	0	0	18
TGAGTCGTAGGGCCGAACCCATCGTTCCAGGCCCCGTGC	0	0	0	9	4	4	1	18
GGTGTCGTAGGGCCGCAACTCATCGTTCCAGGCCCCGTG	0	2	0	2	2	4	8	18
GGTGTCGGTAGGGCCGAACTCATCGTTCCAGGCCCCGTGGC	0	0	1	2	2	6	7	18
TGAGTTGTAGGGACCGAACTCATCGTTCCAGGCCCCCGTGC	1	0	2	7	4	1	3	18
GCGAGTTGTAGGGCCGAACTCATCGTTCCAGGCCCCGTGC	6	1	0	6	1	1	3	18
GTGAGTTGTAGGGCCGAACTCATCGTTCCAGGCCCCCGTGCC	1	0	1	4	1	3	8	18
GGATGTCGTAGGGCCGAACTCATCGATTCCAGGCCCCGTGC	0	2	1	2	4	5	4	18
GAGAGTTGTAGGGCCCGAACTCATCGTTCCAGGCCCCGTGC	2	2	0	9	2	2	1	18
TGATGTGTAGGCGGCAACTCATCGTTCCAGGCCCCGTGC	3	0	0	14	1	0	0	18
GGTGTCGTAGGGGCCGAACTCATCGTTCCAGGCCCCGTGT	2	0	0	3	3	7	3	18
GAGTGTTGAGGGCCGAACTCATCGTTCCAGGCCCCGTGC	3	1	7	5	1	0	1	18
GGTGTGTCGTGGGCCGAACTCATCGTTCCAGGCCCCGTGC	0	0	1	3	5	5	4	18
GTAGCGTAGGGCCGAACTCATCGTTCCAGGCCCCGTGC	0	0	0	7	1	9	1	18
GGTGTCGTAGGGCCGAACCATCTCCGTGCCCAGGCCGTCG	0	0	0	2	0	12	4	18
GATGTCGTAGGGCCGAACTCATCGTTCCAGGCCCCGTC	0	0	0	3	6	6	3	18
GGTGCCGTAGGGCCGAACTCATCGTCCAGGCCCCGTGC	1	0	1	1	3	3	9	18
GTGCGTAGGGCCGAACTCATCGGTTCCAGGCCCCGTGC	1	0	1	1	1	10	4	18
GGTGTCGTAGGGCCGAACTCATCGTTCAGGCCCCAGTGC	1	0	2	4	5	3	3	18
GAGTGTTGTAGGGCCGAACTCATCGTTCCAGGCCCCGTA	3	1	2	12	0	0	0	18
TGATGTTGTAGGGCCGAACTCATCGTTCCAGGCCCCGGTGC	7	0	1	8	0	1	1	18
GGTGTCGTAGGGGCCGAACTCATCGTTCCAGGCCCCAGTGC	0	0	2	6	1	4	5	18
GGATGTCGTAGGGCCGAACTCATCGTTCCAGGCCTCGTGC	0	0	1	1	4	5	7	18
TCGAGTTGTAGGCCGAACTCATCGTTCCAGGCCCCGTGC	4	0	1	5	1	2	5	18
GGGTGTCGTAGGGCCGAACTCATCGTTCCGGGCCCCGTGC	1	1	1	3	2	4	6	18
AGTGTGTAGGCCGAACTCATCGTTCCAGGCCCCGTGCC	8	4	0	5	1	0	0	18
GGTGTCGTAGGGCCGAACTCATCGTTCCAGGCCCGTCGT	1	0	0	2	8	6	1	18
TGAGTTGTAGGGCCGAAACTCATCGTTCCAGGCCCCGTGGC	1	1	1	8	1	2	4	18
GGTGTCTAGGGCCGAACTCATCGTTCCAGGCCCCGTGCC	0	0	1	6	1	4	6	18
GGTGTTGTAGGGCCGAACTCATCGTTCCAGGCCCCGCG	4	1	1	9	0	2	1	18
TGAGTGGTAGGGCCGAACTCATCGTTCCCAGGCCCCGTGC	1	0	1	4	2	2	8	18
AATGTTGTAGGGCCGAACTTATCGTTCCAGGCCCCGTGC	16	0	0	2	0	0	0	18
GGTGTCGTAGGGCCGAACTCATCGTTCCAGGCCCCGTGTCC	0	0	2	2	1	6	7	18
GAGTGTCGTAGGGCCGAAACTCATCGTTCCAGGCCCGTGC	3	0	0	8	1	5	1	18
GGGTGTCGTAGGGCCCCGAACTCATCGTTCCAGGCCCCGTGC	0	0	2	4	4	3	5	18
GAGTGTGTAGGGCCGAACTCATCGTTCCAGGCCCGGTG	11	2	0	4	1	0	0	18
GTGTCGTAGGGCCCGAACTCATCGTTCCAGGCCCCGTGC	0	0	0	4	3	3	8	18
ATGAGTTGTAGGGCCGAACTCATCGTTCCAGCCCCGTGC	2	1	0	8	2	1	3	17
GGTGTCGTAGGGCCGAACCTCATCGTCCAGGCCCCGTGC	1	0	0	0	3	6	7	17
AGTGTTGTAGGGCCGAAACTCATCGTTCCAGGCCCCAGTGC	5	3	2	5	0	1	1	17
TGATGTGTAGGGCCGAACTCATCGTCCAGGCCCCGTGC	0	0	0	6	1	4	6	17
TGAGTGTCGGGCCGAACTCATCGTTCCAGGCCCCGTGC	3	0	1	5	1	5	2	17
GGTGTCGTAGGGCCGAACTCATCGTTCTAGGCCCCGTG	1	0	1	1	2	8	4	17
GAGTGTCGTAGGGCCGAACTCATCGTTCCAGGCCCAGTGC	1	0	0	10	2	3	1	17
GGTGTCGTAGGGCCGAACCTCTCCGATGCCCGCCTGCG	0	0	0	1	4	5	7	17
GAGTGTGTAGGGCCGAACTCATCGTTCCAGGCCCCATGT	15	0	0	2	0	0	0	17
GGATGTCGTAGGGCGAACTCATCGTTCCAGGCCCCGTGC	0	0	0	4	3	4	6	17
GGTGTCGTAGGGCCGAACTCATCGTTCCAGGCCCCGGTGGC	0	0	0	5	2	5	5	17
GGTGTCGTAGGGCCGAACTCATCGTTCCTAGGCCCCGTGC	0	0	1	1	1	7	7	17
ATGAGTTGTAGGGCCGAACTCATCGTTCCAAGGCCCCGTGC	4	0	2	9	0	1	1	17
GAGTCGTAGGGCCGAACTCATCGTTCCAAGCCCCGTGC	0	1	1	7	0	6	2	17
TGAGTTGTAGGGCCGAACTTCATCGTTCCCAGGCCCCGTGC	1	0	1	4	6	1	4	17
GAGTGTTGTAGGGCCGAAGCTCATCGTTCCAGGCCCCGTGC	4	4	3	6	0	0	0	17
GAGTGTGTAGGGCCGAACTCATCGTTTCCAGGCCCCCGTGC	1	0	1	10	1	4	0	17
GGGTGTCGTAGGGCCGAAAACTCATCGTTCCAGGCCCCGTGC	0	2	0	4	6	5	0	17
GGTGTCGTAGGGCCGAACCCATCGTTCCAGGCCCCGTC	0	0	0	5	2	1	9	17
GAGTGTGTAGGGCTAACTCATCGTTCCAGGCCCCGTGC	2	0	1	10	0	4	0	17
GGTGTCGTAGGGGCCGAATCATCGTTCCAGGCCCCGTGC	2	0	0	4	1	5	5	17
GGATGCGTAGGGCCGAAACTCATCGTTCCAGGCCCCGTGC	0	1	1	1	5	5	4	17
GGCGTCGTAAGGGCCGAACTCATCGTTCCAGGCCCCGTGC	7	1	2	3	1	0	3	17
GGGTGTCGTAGGGCCGAACTCATCGTTCCAGGCCCCCTGCG	0	1	1	2	4	2	7	17
GGTGTCGTAGGACCGAACTCATCGTCCAGGCCCCGTGC	0	0	0	3	2	6	6	17
GGTGTGCGTAGGGCCGAACTCATCGTTCCAGGCCCCGGTGC	1	0	2	5	0	2	7	17
TGAGTGTAGGGCCGAACTCATCGTTCCAGGCCCCTTGC	2	1	1	8	0	2	3	17
GAGATGTCGTAGGGCCGAACTCATCGTTCCAGGCCCGTGC	2	0	0	4	3	5	3	17
GAGTGTGTAGGGCCGAACTCATCGTTCCAGGCCCCCGTACG	7	0	0	8	0	0	2	17
TGGAGTTGTAGGGCCGAACTCATCGTTCCAGGCCCCGTG	2	1	2	3	3	3	3	17
GGGTGTTGTAGGGCCAGAACTCATCGTTCCAGGCCCCGTGC	1	0	5	7	3	1	0	17
GATGCGTAGGGCCGAAACTCATCGTTCCAGGCCCCGTGC	4	0	0	3	3	6	1	17
AGTGTTGTAGGGCCGAACTATCGTTGCCAGGCCCCGTGC	9	0	2	2	1	1	2	17
GGTGATCGTAGGGCCGAACTCAATCGTTCCAGGCCCCGTGC	1	1	1	2	1	4	7	17
GAGTGTTGTAGGGCCGGAACTCATCGTTCCAGGCCCCGTGC	7	4	3	1	0	1	1	17
AGTGTTGGTAGGGCCGAAGCTCATCGTTCCAGGCCCCGTGC	4	3	5	5	0	0	0	17
AGTGTTCGTAGGGCCGAACTCATTCGTTCCAGGCCCCGTGC	7	1	1	7	0	1	0	17
TGAGTTGAGGGCCGAACTCATCGTTCCAGGCCCCCGTGC	4	1	3	4	0	2	3	17
GGTGTCGTAGGGCCGAACCTCATTCCTGCCCGGCCCGTCG	0	0	0	1	0	11	5	17
AGAGTTGTAGGGCCGAACTCATCGTTCCAGGCCCCGAGC	0	0	1	13	2	0	1	17
GTGAGTCGTAGGGCCGAACTCATCGTTCCAGGCCCGTGT	1	0	0	4	3	6	3	17
GTGATGTGTAGGCCGAACTCATCGTTCCAGGCCCCCGTGC	0	0	0	5	2	2	8	17
GGTGGGTCGTAGGCCGAACTCATCGTTCCAGGCCCCGTGC	0	0	0	1	2	6	8	17
AATGTTTGTAGGGCCGAACTCATCGTTCCAGGCCCCGTGC	8	2	4	3	0	0	0	17
GGTGCGTAGGGCGAACTCATCGTTCCAGGCCCCCGTGC	1	1	0	2	0	9	4	17
GTGAGTCGTAGGGCCGAACTCATCGTTCCAGGCCCCGTAC	1	0	1	9	3	1	2	17
ATGAGTTGTAGGGCCGAACTCATCGTTCCAGGCCCCGTCGC	4	0	0	6	4	0	3	17
GGTGTCGTAGGGCCGAACTCATCGTTCCAGGCCCCGTGTTTC	0	0	2	1	4	3	7	17
GGTGTGTGGTAGGGCCGAACTCATCGTTCCCAGGCCCGTGC	0	0	1	5	4	3	4	17
GGTGTCGTAGGGCCGAACTCATCGTTCCCAAGCCCCGTGC	0	0	1	4	2	3	7	17
GGTGCGTAGGGCGAACTCATCGTTGCCAGGCCCCGTGC	0	0	1	6	3	3	4	17
AGTGTCGTAGGGCCGAACTCATCGTTCCAGGCCCCTGGC	0	0	1	14	1	1	0	17
AGTGTTGTAGGGCCGAACTCATCGTTCCAAGCCCCGTAC	3	2	8	4	0	0	0	17
AGTGTTGTAGGGCCGGAACCCATCGTTCCAGGCCCCGTGC	7	0	4	3	1	2	0	17
AGTGTTGTAGGGCCGAACTCATCGTTCCAGGCCCTGTAC	8	1	4	3	1	0	0	17
GTGATGTCGTAGGGCCGAACTCATCGTTCCAGGCCCCGTGG	0	0	0	4	3	8	2	17
GAGTGTGTAGGGCCGAACTCATCGTTCCAGGCCCCCATGC	0	0	0	13	2	1	1	17
GGTGTGTCGTAGGCCGAACTCATCGTTCCAGGCCCCGTGC	1	0	0	7	2	2	5	17
TGAGCGTAGGGCCGAACTCATCGTTCCAGGCCCCGTGC	1	0	0	3	6	4	3	17
GGTGTCGTAGGGCCGAACTCATCGTTACCAGGCCCCGTG	0	0	2	2	2	6	5	17
AGTGTGTAGGGCCGAACTCATCGTTCCAGGCTCCGTGC	8	1	2	3	0	0	2	16
GAGTGCGTAGGGCCGAACTCATCGTTCCAGGCCCCGTCCG	1	0	0	3	1	6	5	16
GTGTCGTAGGGCCGAAACTCATCGTTCCAGGCCCCGTG	1	1	0	2	2	5	5	16
GGAGTGTCGTAGGGCCGAAACTCATCGTTCCAGGCCCCGTGC	0	0	3	6	1	3	3	16
GGTGGTCGTAGGGCCGAATCATCGTTCCAGGCCCCGTG	1	0	0	4	1	4	6	16
GGTGTCGTAGGGCCGAACCTCATCGTGCCCGGCCGTCG	0	0	0	1	1	11	3	16
AGTGTTGTAAGGGCCGAACTCATCGTTCCAGGCCCCGTCGC	5	2	2	4	1	2	0	16
GGTGTCGTAGGGCCCGAACTCATCGTTCCAGGCCCCGTG	0	0	2	2	2	7	3	16
GGTGTCGTAGGGCCGAACTCATCGTTCCAGGCCCCCGTCCC	0	0	2	3	8	1	2	16
AGTGTTGGTAGGGCCGAACTCATCGTTCCCAGGCCCCGTG	7	1	2	4	2	0	0	16
AGAGTTGTAGGGCCGAACTCATCGTTCCAGGCCCACGTGC	8	2	1	3	2	0	0	16
GGTGTCGTAGGGCCGAACTCATCGTTCCAGGCCCCGGTT	0	0	0	1	11	0	4	16
TGAGTGTAGGGCGGAACTCATCGTTCCAGGCCCCGTGC	0	0	0	0	2	1	13	16
GGGAGTTGTAGGCCGAACTCATCGTTCCAGGCCCCGTGC	9	2	0	2	0	2	1	16
GGTGTCGTAGGGCCGAACACATCGTTCCAAGGCCCCGTGC	0	0	0	0	3	2	11	16
TGAGTTGGTAGGGCCGAACTCATCCGTTCCAGGCCCCGTGC	1	1	1	4	3	2	4	16
GTGGTCGGTAGGGCCGAACTCATCGTTCCAGGCCCCGTGC	0	1	0	0	5	8	2	16
GGTGGTTGTAGGGCCGAACTCAATCGTTCCAGGCCCCGTGC	0	1	3	4	2	6	0	16
GGTGTCGTAGGGCCGAACTCATCGTTCCCAGGCCCCGTC	0	0	0	1	1	6	8	16
AGTGTTGTGGGGCCGAACTTATCGTTCCAGGCCCCGTGC	10	0	1	5	0	0	0	16
AGTGTGTAGGGCCGAACTCATCGTTCTAGGCCCCGTGC	4	4	2	2	2	1	1	16
CGTGTTGTAGGGCCGAACTCATCGTTCCAGGCCCCGTCC	16	0	0	0	0	0	0	16
GGTGTCGTAGGGCCGAACCTCGATTCCATGCCCGCCGCG	0	0	0	1	2	3	10	16
TGAGTTCGTAGGGCCGAACTCATCGTTCCCAGGCCCCGTGC	2	0	1	5	0	0	8	16
GGTGTCGCTAGGCCGAACTCATCGTTCCAGGCCCGTGC	1	0	1	0	5	2	7	16
GGTGTCGTAAGGGCCGAACTCATCGTTCCAGGCCCCGTGT	0	0	0	2	4	5	5	16
GAGTGTTGTAGGGCCGAACTCATCGTTCCAGGCCCCAGTGC	5	1	3	3	3	0	1	16
GGTGTCGTAGGGGCCGAACTCATCGTTCCAGGGCCCCGTGC	0	0	1	4	0	6	5	16
GAGTGTCGTAGGGCCGAACTCACCGTTCCAGGCCCCGTGC	3	1	0	6	4	2	0	16
GGTGTCGTAGGGCCGAACTCATCGTTCCAGGCCCCTGGCG	0	0	0	3	1	8	4	16
TGAGTTGTAGGGCCGAACTCATCGTTCCAGGCCCCCTTGC	5	0	2	3	2	4	0	16
AGGTTCGTAGGGCCGAACTCATCGTTCCAGGCCCCGTGC	16	0	0	0	0	0	0	16
AGTGTTCATAGGGCCGAACTCATCGTTCCAGGCCCCGTGC	13	0	1	1	0	0	1	16
AGTGTTATAGGGCCGAACTCATCGTTCCAGGCCCCGTGT	8	0	2	5	1	0	0	16
GAGAGTCGTAGGGCCGAAACTCATCGTTCCAGGCCCCGTGC	1	0	0	4	3	6	2	16
GTGTTGTAGGGCCGAACTCATCGTTCCAGGCCCCGCTGC	3	1	3	5	1	3	0	16
GGTGTCGTAGGGCCGAACCATCTTCCGTGCCCAGGCCGTCG	0	0	0	1	1	7	7	16
AGTGTGTAGGGTCCGAACTCATCGTTCCAGGCCCCGTGC	5	1	0	7	2	1	0	16
GGTGCCGTAGGGCCGAACTCATCGTTCCAGGCCCCGTG	1	0	1	2	4	2	6	16
GGTGTCGTAGGGCCGAACCTCATTCCATGCCCAGGCCGCG	1	0	0	3	0	6	6	16
GAGAGTCGTAGGGCCGAACTCATCGTTCCAGGCCCCATGC	4	0	0	2	4	1	5	16
GGAGTTGTAGGGCCGAACTCATCGATTCCAGGCCCCGTGC	1	0	3	1	4	5	2	16
TGAGTGTAGGGCCGAACTCATCATTCCAGGCCCCGTGC	0	0	0	4	2	5	5	16
GGTGTCGTAGGGCCGAACTCATTGTTCAGGCCCCGTGC	9	1	2	2	1	1	0	16
GGGTGTCGTAGGGCGTAACTCATCGTTCCAGGCCCCGTGC	1	0	0	3	4	2	6	16
AGTGTTCGTAGGGCCGAACCCATCGTTCCAGGCCCCGTGC	2	3	0	10	1	0	0	16
AGTGTTGTAGGGCCGAACTTATCGTTCCAGGCCCTGTGC	10	2	0	4	0	0	0	16
GTGAGTTGTAGGGCCGAACTCATCGTTCCAAGCCCCGTGC	1	0	1	1	1	2	10	16
AGTGTGTAGGGCCGAACTCATCATTCCAGGCCCCGTGC	5	0	3	3	2	3	0	16
TAGTCGTAGGGCCGAACTCATCGTTCCAGGCCCCGTGC	2	0	1	7	0	3	3	16
AGTGCTGTAGGGCCGAACTCATCGTTCCAGGCCCCGCCC	10	2	0	4	0	0	0	16
GGTGTCGTAGGGCCGAACTCATCGTTGCCAGGCCCCATGC	1	0	2	5	1	3	4	16
GGTGTGTCGTAGGGCCGAACTCATTCGTTCCAGGCCCCGTGC	2	0	4	5	0	4	1	16
AGTGTAGTAGGGCCGAACTCATCGTTCCAGGCCCCGTGCC	12	0	1	3	0	0	0	16
GAGTGCCGTAGGGCCGAACTCATCGTTCCAGGCCCCGTGC	1	0	0	2	5	7	1	16
GGGTGTCGTAGGGGCCGAATCATCGTTCCAGGCCCCGTGC	0	0	0	2	1	6	7	16
GGGTGTCGTAGGGGGCCGAACTCATCGTTCCAGGCCCCGTGC	0	0	2	2	4	3	5	16
GGTGATCGGTAGGGCCGAACTCATCGTTCCAGGCCCCGTGC	0	1	0	4	4	5	1	15
TGAGTTGTAGGGGGGCCGAACTCATCGTTCCAGGCCCCGTGC	2	0	0	5	2	2	4	15
AGTGTGTAGGGCCGAACTCATCGTTCCAGGCCCTCGTGC	4	0	5	3	1	2	0	15
GGTGTCGTAGGGTCCGAACTCATCGTTCCAGGCCCCGTG	0	0	0	2	0	8	5	15
TGAGTTGTAGGCCGTAACTCATCGTTCCAGGCCCCGTGC	2	0	1	3	4	2	3	15
GGGTGTCGTAGGGCCGAACTCATCGTTCCAGGCCCCGTACCG	0	0	0	2	6	3	4	15
AGTGTTGTTAGGGCCGAAACTCATCGTTCCAGGCCCCGTGC	7	0	3	4	1	0	0	15
GGCTCGTAGGGCCGAACTCATCGTTCCAGGCCCCGTGC	1	1	1	3	2	5	2	15
GGTGTCGTAGGGCCGAACCTCATCCGTGCCCGGCCTGTCG	0	0	0	0	5	6	4	15
GGGGTGTTGTAGGGCCGAACTCATCGTTCCAGGCCCCGTGC	3	2	1	3	5	1	0	15
GTGAGTGTAGGGCCGAACTCATCGTTGCCCAGGCCCCGTGC	0	0	0	1	1	6	7	15
GGGTGTCGTAGGGCCGAATCATCGTCCAGGCCCCGTGC	0	0	0	2	3	3	7	15
GGTGCCGTAGGGCCGAACTCATCGTTGCCAGGCCCCGTGC	1	0	1	2	5	2	4	15
TATGTGTAGGGCCGAACTCATCGTTCCAGGCCCCGTGC	1	0	0	3	0	6	5	15
GATGTCGTGGTCGGCAACTCATCGTTCCAGGCCCCGTGC	2	0	1	3	5	4	0	15
AGTGTTGTAGGGCCGAACATCATCGTTCCAGGCCCGTGC	5	1	4	4	1	0	0	15
GGTGTTGTAGGGCCGAACTCATCGTTCCAGGCCCGCTGC	1	1	0	9	1	2	1	15
TGATGTTGTAGGGCCGAACTCATCGGTTCCAGGCCCCGTGC	1	0	0	6	5	1	2	15
TGAGTTGTAGAGCGAACTCATCGTTCCAGGCCCCGTGC	1	0	1	1	1	5	6	15
GGTGTCGTAGGGCCGAACTCATCGTTCCAAGGCCCCGTGTC	0	0	0	1	2	7	5	15
TGAGTTGTAGGGCCGAACGCATCGTTCCAGGCCCCCGTGC	0	0	2	6	4	3	0	15
GATGTGTGTAGGGCCGAACTCATCGTTCAGGCCCCGTGC	2	0	0	6	3	4	0	15
AGTGTTGTAGGGCCGGAACTCATCGTTCCAGGCCCGTGC	12	0	0	3	0	0	0	15
TGAGTTGGTAGGGCCGAACCCATCGTTCCAGGCCCCGTGC	0	2	0	2	4	3	4	15
GGTGTCGTAGGGCCGAACTCATCGTTGCCAGGCCCTGTGC	0	1	0	1	3	5	5	15
GGGTGTCGTGGGGGCCGAACTCATCGTTCCAGGCCCCCGTGC	0	1	2	2	4	3	3	15
GGTGTCGTAGGGCCGAACTCATCTTCCAGGCCCCGTAC	2	2	0	2	4	4	1	15
AAACTCGTAGGGCCGAACTCATCGTTCCAGGCCCCGTGC	15	0	0	0	0	0	0	15
ATGAGTTGTAGGGCCGAACTCATCGTTCCAGGCCCCAGTGC	4	0	3	2	2	3	1	15
GGTGTCGTAGGGCCGAACCCATCGTTCCAGCCCCGGCTGC	0	0	1	1	1	6	6	15
AGTGTTGTAGGGCCGAACTCATCGTTCCTGGCCCCCGTGC	6	3	2	3	0	1	0	15
GGTGTCGTAGGGCCGAACTCATCATTCCCAGGCCCCGTGC	1	0	0	3	2	7	2	15
GGTGTCGTAGGGCCGAACCTCGTTCCTGCCCAGGCCGTCG	0	0	0	0	1	7	7	15
GGTGTCGTAGGGCCGAACCTCATCGTTCCAGGCCCCGTCGC	1	0	1	2	1	5	5	15
AGTGTGTAGGGCCGAACTCATCGTTCCAGGCCCCGAGC	2	1	4	6	2	0	0	15
GGAGTTGTAGGGCCGAACTCATCGTTCCAGGCCCCCGTGCC	1	0	0	3	1	5	5	15
GGATGCCGTAGGGCCGAACTCATCGTTCCAGGCCCCGTGC	0	0	0	7	2	3	3	15
GTGTCGTAGGGCCGAACTCATCGTTCCAGGCCCCGGCG	0	0	0	4	1	7	3	15
AGTGTCTGTAGGGCCGAACTCATCGTTCCAGGCCCCGTGC	9	1	0	4	1	0	0	15
AGTGTTGTAGGGCCGAACTCATCGTTCCAGGCCCCAGTGT	12	1	0	1	1	0	0	15
AGTGTTGTAGGGCCGAACACATCGTTCCAGGCCCCGTGT	8	0	0	7	0	0	0	15
TGAGTTGTTTTAGGGCCGAACTCATCGTTCCAGGCCCCGTGC	1	0	0	4	3	4	3	15
AATGTTGTAGGGCCGAACTCATCGTTCCAGGCCCCGTGCC	12	0	0	2	0	0	1	15
AGTGTGTAGGGCCGAACTCATCGTTCCAGGCCCAGTGC	2	2	2	9	0	0	0	15
TGAGTTGTAGGGCCGAACTCAATCGTTCCAGGCCCGTGC	1	1	1	3	4	2	3	15
GGGTGTCGTAGGGCCGAACTCATCGTTCCAGGCCCCCGTTGC	2	0	0	5	2	3	3	15
GGTGTCGTAGGGCCGAACTCACGTTCCAGGCCCCGGTGC	0	0	1	4	0	3	7	15
GGTGTCGTAGGCCGAACTCATCGTTACCAGGCCCGTGC	1	0	3	1	4	1	5	15
GGTGGTCGTAGGGCCGAACTCATCGTTCCAGGCCCCTGTGC	0	0	0	5	0	5	5	15
GTGTGTCGTAGGGCCGAACTCATCGTTGCCAGGCCCGTGC	1	1	0	0	5	5	3	15
AGTGTTGTAGGGCCGAACTCATCGTTCCAGGTCCCGTGT	12	0	0	3	0	0	0	15
GGGTGTCGTAGGGCCGAACTCATCTTCCCAGGCCCCGTGC	0	0	0	2	2	5	6	15
GGTGTCGTAGGGACCGAACTCATCGTTCCAGGCCCCGTGCC	0	0	1	0	1	3	10	15
GGGTGTCGTAGGGCCGAAACCCATCGTTCCAGGCCCCGTGC	0	1	1	1	0	4	8	15
GGTGTCGTAGGGCCGAAACTATCGTTCCAGGCCCGTGC	0	0	0	2	3	6	4	15
GTTGAGTTGTAGGGCCGAACTCATCGTTCCAGGCCCCGTGC	0	0	2	1	2	6	4	15
GTGAGTTCGTAGGGCCAACTCATCGTTCCAGGCCCCGTGC	0	0	1	4	0	3	7	15
GATGTCGTAGGGCCGAACTCATGTTCCAGGCCCCGTGC	3	0	0	2	4	4	2	15
GGTGTCGTAGGGCCGAACTCATCGTTCCAGGGCCCCGTCGC	1	0	0	0	2	8	4	15
AGTGTTGTAAGGCCGAACTCATCGTTCCAGGCCCCGTGT	10	1	0	2	2	0	0	15
GGTGTCGTAGGGCCGAACCCATCGTTCAGGCCCCGTGC	0	0	0	3	0	7	5	15
AGTGTTGTAGGGCCGAACACATCGTTCCAGGCCCCGTG	12	3	0	0	0	0	0	15
AGTGTTGTAGGGCCGAACTCGGATCGTTCCAGGCCCCGTGC	7	0	3	4	0	1	0	15
ATGAGTGTTGGACGGCGAACTCATCGTTCCAGGCCCCGTGC	8	0	0	5	0	0	1	14
GGAGGTCGTAGGGCCGAACTCATCGTTCCAGGCCCCGTGC	0	0	1	1	3	2	7	14
GTGAGTGTAGGGCCGAACTCATCGTTCCAGGCCCCGTGCCC	0	0	0	3	2	5	4	14
GGTGTCGTAGGGCCGAACTCATCGTTCCAGGCCCCATA	0	0	0	1	4	5	4	14
GGTGTCGTAGGACGGCGAACTCATCGTTCCAGGCCCCGTGC	2	0	0	2	3	3	4	14
GGATGTCCTAGGGCCGAACTCATCGTTCCAGGCCCCGTGC	0	0	0	0	4	9	1	14
AGTGTTGTAGGGCCGAACTCATCGTGCCAGCCCCGTGC	13	0	0	1	0	0	0	14
TGAGTCGGTAGGGCCGAACTCATCGTTCCAGGCCCCGTGC	1	0	2	4	0	3	4	14
AGTGTGTAGGGCCGAACTCATCGTTTCAGGCCCCGTGC	7	2	0	5	0	0	0	14
GGTGTCGTAGGGCCGAACCTCGTTCCATGCCCGCCTGTCG	0	0	0	3	0	6	5	14
TGAGTTGTAGGGTTCCGAACTCATCGTTCCAGGCCCCGTGC	1	0	3	4	0	5	1	14
TGAGCTGTAGGGCCGAACCCATCGTTCCAGGCCCCGTGC	0	0	1	5	1	6	1	14
TGAGTGTAGGGCCGAACTCATCGTTCCAGGCCCGTCGC	0	0	1	3	1	5	4	14
GGATGTCGTAGGGCCGAACTCATCGTTCCAGGCCCGGTGC	1	1	1	5	1	1	4	14
GGACCTGTGCAGTAGCCAGTGTGGACTGGGCTGCCCCC	14	0	0	0	0	0	0	14
AGTGTTGTAGGGCCGAAACTCTCGTTCCAGGCCCCGTGC	3	1	3	5	1	0	1	14
GTGTGTCGTAGGGCCGTAACTCATCGTTCCAGGCCCCGTGC	0	0	1	3	3	5	2	14
GGATGTCGTAGGGCCAAACTCATCGTTCCAGGCCCCGTGC	0	0	0	3	0	5	6	14
GAGAGTGTAGGGCCGAACTCATCGTTCCAGGCCCCGTGCC	0	0	0	6	3	3	2	14
AGTGTTGTAGGGCCGAACTCATCGTTCCAGGCCCTGTGT	10	1	0	3	0	0	0	14
GGATGTCGAGGGCCGAACTCATCGTTCCAGGCCCCGTGC	0	0	0	2	3	7	2	14
TGAGTTGTAGGGCCGAACTCATCGTTCCAGGCCCCCGTCGC	1	0	1	5	1	2	4	14
GGTGTCGTAGGGCCGAACTCATCGTCCAGGCCCTGTGCC	1	0	0	2	4	7	0	14
GATGTGTGTAGGGGCCAACTCATCGTTCCAGGCCCCGTGC	1	0	0	7	1	5	0	14
AGTGTTGTAGGGCCGAAACTCGATCGTTCCAGGCCCCGTGC	7	2	2	3	0	0	0	14
GTGTGTGTAGGGCCGAACTCACGTTCCAGGCCCCGTGC	0	1	1	5	1	4	2	14
GTGTGTGTAGGGCCGAACTCATCGTTCCAGGCCCCGTC	0	0	0	2	2	3	7	14
GTGATGTGTAGGGCCGAACTCATCGTTCCAGCCCGTGC	0	0	0	2	0	5	7	14
AGTGTTGTAGGGCCGAACTCATCGTTCCAGGCCCCAGTG	11	1	1	1	0	0	0	14
GGTGTCGTAGGGCCGAACTATCGTTCCCAGGCCCGTGC	0	0	0	2	4	4	4	14
AGTGTTGTAGGGCCCGAACTCATCGTTCCAGGCCCGTGC	9	1	0	4	0	0	0	14
ATGAGTTGTAGGGCCGAACTCATCGTTCCAAGCCCCGTGC	2	0	2	9	0	0	1	14
AGTGTCGTAAGGGCCGAAACTCATCGTTCCAGGCCCCGTGC	5	1	2	5	1	0	0	14
AGTGTTGTAGGGCCGAACTCATCGTTCCAGGCCCCGTGTTC	8	1	1	3	1	0	0	14
GAGTCATAGGGCCGAACTCATCGTTCCAGGCCCCGTGC	0	0	0	10	0	3	1	14
TGAGTTGTAGGCCGAACTCATCGTTCCAGGCCCCGTCG	2	0	0	3	1	4	4	14
GGGTGTCGTAGGGCCCGAATCATCGTTCCAGGCCCCGTGC	1	0	2	3	0	2	6	14
GAGATGTCGTAGGGCCGAAACTCATCGTTCCAGGCCCCGTGC	0	0	0	6	3	4	1	14
GTGCGTTGGACGGCAACTCATCGTTCCAGGCCCCGTGC	4	0	0	5	1	2	2	14
GGTGTCGAGGGCCGAACTCATCGTTCCAGGCCCCGTGT	0	0	0	2	3	5	4	14
GTGTCGTAGGGCCGAACTCATCGTTCCAGGCCTCCGTGC	0	0	0	2	2	5	5	14
GGTGTCGTAGGGCCGAACTCATCGTTCCCAGGCCCGTAC	0	0	1	7	1	1	4	14
TGAGTATAGGGCCGAACTCATCGTTCCAGGCCCCGTGC	0	0	1	2	0	6	5	14
AGTGTTGTAGGGCCGAACTCATCGTTCTAGGCCCCGTGT	10	3	0	1	0	0	0	14
AGTGTTGTACGGGCCGAAACTCATCGTTCCAGGCCCCGTGC	5	5	0	3	1	0	0	14
TGTGTTGTAGGGCCCGAACTCATCGTTCCAGGCCCCGTGC	2	0	2	8	0	2	0	14
GGTATCGTAGGGCCGAACTCATCGTTCCAGGCCCCGTG	0	0	0	2	4	3	5	14
GGCGGTCGTAGGGCCGAACTCATCGTTCCAGGCCCCGTGC	5	1	1	1	1	2	3	14
GTGTGTGTAAGGGCCGAAACTCATCGTTCCAGGCCCCGTGC	0	0	0	5	2	4	3	14
GTCGAGTTGTAGGGCCGAACTCATCGTTCCAGGCCCCGTGC	2	0	1	5	0	3	3	14
GGTGTCGTAGGGCCGAACTCATCGTTCCAGGCCCCAGTGGC	0	0	0	5	1	2	6	14
GAGTCGTAGGGCCGAACTCATCGTTCCAGGCCCTGTGC	0	0	0	6	1	3	4	14
GTGGTCGTAGGGCCGAACTCATCGTTCCAGGCCCCGTG	0	2	0	2	3	4	3	14
GGTGTTGAGGGGCCGAACTCATCGTTCCAGGCCCCGTGC	0	0	2	3	5	2	2	14
GAGTGTTGTAGGGCCGAACACATCGTTCCAGGCCCCGTGC	5	1	2	4	2	0	0	14
GGGTGTCGTAGGGGCCGAACTCATCGTTCCAGGCCCCGTGT	0	0	0	3	5	3	3	14
ATGAGTTGTAGGGCGAACTCATCGTTCCAGGCCCCGTGC	4	0	1	5	0	1	3	14
TGAGTTGTAGGGCCGAACTCATCGTTCCAGGCCCCTGTGCC	0	0	1	9	1	0	3	14
AGAGTTGTAGGACCGAACTCATCGTTCCAGGCCCCGTGC	3	0	0	6	2	3	0	14
TGAGTTGTAGGGCCGAACCCATCGTTCCAGGCCCGGTGC	3	2	1	8	0	0	0	14
AGTGTGTAGGGCCGAACATCATCGTTCCAGGCCCCGTGC	8	1	0	4	0	0	1	14
GGTGTACGTAGGGCCGAACTCATCGTTCCAGGCCCCGTG	0	0	1	4	1	6	2	14
GTGTCGCTAGGGCCGAACTCATCGTTCCAGGCCCCGTGC	0	0	0	2	2	6	4	14
AGTGTGTAGGGCCGAAATCATCGTTCCAGGCCCCGTGC	6	1	1	5	0	1	0	14
GAGTGTGTAGGGCCGAACTCATCGTTCCAGGCCCGTGCC	0	1	0	10	1	2	0	14
GGGTGTCGTAGGGCCGAAACTCATCGTTCCAGGCCCCATGC	1	0	0	2	4	2	5	14
AGTGTTTGTGGGGCCGAACTCATCGTTCCAGGCCCCGTGC	9	1	2	0	1	0	0	13
AGACTCGTAGGGCCGAACTCATCGTTCCAGGCCCCTGC	13	0	0	0	0	0	0	13
TGTGTTGTAGGGCCGAACTTATCGTTCCAGGCCCCGTGC	11	0	0	2	0	0	0	13
GTGATGTGCTAGGGCCGAACTCATCGTTCCAGGCCCCGTGC	0	0	1	3	0	4	5	13
AGTGTCTGGTAGGCAACTCATCGTTCCAGGCCCCGTGC	4	0	3	6	0	0	0	13
GGGTGTCGTAGGGCCGAACTCATCGTTCCAGGCCCCCGCG	0	0	0	1	3	3	6	13
GGTGTCGTAGGGCCGAACTCATCGTTGCCCAGGCCCCGTG	0	0	0	4	3	4	2	13
GGTGTCGTAGGGCCGAACCATCTTCCTGCCCCAGGCCGCG	0	0	0	3	1	5	4	13
AGTGTGTAGGGCCCGAAACTCATCGTTCCAGGCCCCGTGC	4	1	0	5	0	3	0	13
GGTGTCGTGGGGCCGAACTCATCGTTCCAGGCCCCGTG	0	0	1	6	2	1	3	13
GGTGTCGTAGGGCCGAACTCATCGTTCCAGGCCCCCGTGGCC	2	0	0	0	1	6	4	13
GAGTGTTCGTAGGGCCGAACTCATCGTTCCCAGGCCCCGTGC	2	1	4	2	4	0	0	13
GGTGTGCGTAGGGCCGAACTCATCCGTTCCAGGCCCCGTGC	0	0	1	6	0	2	4	13
GAGAGTCGTAGGCCGAACTCATCGTTCCAGGCCCCGTGC	1	0	1	5	0	5	1	13
AGTGTTGGTAGGGCCGAACTCATCGTTCCAGGCCCCGTAC	4	2	4	3	0	0	0	13
AGTGTTGTAGGGCCGAACTCATCGTTCCAGGCCCCGTAAGC	9	0	1	1	1	0	1	13
GCGATGTCGTAGGGCCGAACTCATCGTTCCAGGCCCCGTGC	0	0	0	4	0	5	4	13
TGAGTTGTGGGGCCGAACTCATCGTTCCCAGGCCCCGTGC	4	0	2	1	1	1	4	13
AGTGCTGTGGGGCCGAACTCATCGTTCCAGGCCCCGTGC	1	1	4	6	1	0	0	13
GGTGTCGTAGGCCGAACTCATCGTTCCAGGCCCGTGTC	0	0	0	2	2	6	3	13
AGTCTGTAGGGCCGAACTCATCGTTCCAGGCCCCGTGC	6	1	0	4	0	2	0	13
AGTGTTGTAGGGCCGAACTCATCGTTCCAGGCCCCGCGCC	9	1	2	1	0	0	0	13
TGAGTGGTAGGGCCGAACTCATCGTTCCAGGCCCCCGTGC	2	0	1	5	0	2	3	13
GGTCGTCGTAGGGCCGAACTCATCGTTCCAGGCCCCGTGT	3	1	0	4	1	2	2	13
TGGAGTTGTAGGGCCAACTCATCGTTCCAGGCCCCGTGC	1	0	3	4	0	2	3	13
AGTGTTGTAGGGCCGAACTCATCGTTCCAGGCCCCGGGT	1	0	0	10	0	2	0	13
GGGAGTTGTAGGGGCCGAACTCATCGTTCCAGGCCCCGTGC	0	1	1	3	1	0	7	13
TGAGTTGTAGGGCCGAACTCATCGTTCCAGGCCCCATGCC	0	0	2	6	0	0	5	13
AGAATTGTAGGGCCGAACTCATCGTTCCAGGCCCCGTGC	2	0	1	7	1	0	2	13
AGTGTCGTAGGGCCGAAACTCATCGTTCCAGGCCCGTGC	5	3	0	4	1	0	0	13
TAAGTGTAGGGCCGAACTCATCGTTCCAGGCCCCGTGC	3	0	0	4	0	5	1	13
GGTGGTCGTAGGGCCGAACTCATCGTTCCAGGCCCGTGT	1	0	1	3	3	0	5	13
GTGAGTTGTAAGGCCGAACTCATCGTTCCAGGCCCCGTGC	0	0	0	4	0	3	6	13
TGAGTTGTAGGGCCGAAACTCATCGGTTCCAGGCCCCGTGC	2	0	1	2	3	2	3	13
ATCTGTTGTAGGGCCGAACTCATCGTTCCAGGCCCCGTGC	9	0	0	2	0	1	1	13
TGAGCTGTAGGGCCGAACTCATCGTTCCAGGCCCCCGTGC	7	1	1	1	0	1	2	13
TGAGTTGTAGGGCCGGAACTCATCGTTCCCAGGCCCCGTGC	0	0	0	3	3	0	7	13
TGATGTTGTAGGGCCGAACTCATCGTTCCAGGCCCCATGC	1	1	2	9	0	0	0	13
GTGCGTAGGGCCGAACTCATCGTTCCAGGCCCCGTCGC	0	0	1	1	2	5	4	13
TGAGTTTGTAGGGCCGAACTCATCGTTCCAGGCCCCGTGCC	4	1	2	3	1	0	2	13
AGTGTGGTAGGGCCGAACTCATCGTTCCAGGCCCCGTG	2	3	4	2	1	1	0	13
TGAAAAGTTGTAGGGCCGAACTCATCGTTCCAGGCCCCGTGC	0	0	0	5	2	2	4	13
GGTGTCGTAGGGGCCGAACTCATCGTTCCAGACCCCGTGC	0	1	1	0	6	3	2	13
AGTGTGTAGGGCCGAACTCATCGTTCCAGGCCCACGTGC	4	0	2	4	1	2	0	13
GAGTGCGTAGGTCGGCAACTCATCGTTCCAGGCCCCGTGC	2	1	0	4	4	1	1	13
ATGATGTTGTAGGGCCGAACTCATCGTTCCAGGCCCCGTG	8	0	1	4	0	0	0	13
GGGAGTTGTAGGGCCGAACTCATCGTTCCCAGGCCCCGTGC	0	0	1	0	1	4	7	13
TGAGTTGTAGGGCCGAAACTTCATCGTTCCAGGCCCCGTGC	0	0	2	4	0	3	4	13
TCAGTGTAGGGCCGAACTCATCGTTCCAGGCCCCGTGC	0	0	0	3	2	5	3	13
AGTGTTGTAAGGGCCGAACTATCGTTCCAGGCCCCGTGC	8	0	5	0	0	0	0	13
TGAGTTGTAGGGCCGAACTCATCGTTCCAGGCCCCGGGT	0	0	0	5	4	3	1	13
TGGGGAGTTGTAGGGCCGAACTCATCGTTCCAGGCCCCGTGC	0	0	3	6	0	1	3	13
GGGTGTCGTAGGGCCGAACTCAACGTTCCAGGCCCCGTGC	0	1	1	6	1	2	2	13
GAGAGTGTAGGGCCGAACTCATCGTTCCAGGCCCCGTGTC	1	0	0	5	2	3	2	13
AGTATTGTAGGGCCGAACTCATCGTTCCAGGCCCCGTAC	6	1	1	5	0	0	0	13
TGAGTTGTAGGGCCGTAAACTCATCGTTCCAGGCCCCGTGC	3	0	0	3	2	3	2	13
GAGGTGTTGTAGGGCCGAACTCATCGTTCCAGGCCCCGTGC	8	0	0	3	2	0	0	13
GGTGTCGTAGGGCCGAACCCATCGTTCCAGGCCCCGCG	0	0	0	4	0	1	8	13
GGTGTCGTAGGGCCGTAACTCATCGTTGCCAGGCCCCGTGC	0	0	0	4	2	0	7	13
GGTGTGCGTAGGGCCGAAGCTCATCGTTCCAGGCCCGTGC	0	0	1	4	2	4	2	13
GGTGTCGTAGGGCCGAACTCATCGTTGCCAGGCCCCGTGCC	0	1	2	1	2	4	3	13
ATGAGTTGTAGGGCCAACTCATCGTTCCAGGCCCCGTGC	2	0	0	8	2	1	0	13
TGAGTTGTAGGGCCGAACTCATCGTTCCAGGCCCCAAGTGC	1	3	0	5	2	1	1	13
GGTGTCGTAGGGCCGAACTCATCGTTCCAGGCCCCAGTGTC	0	0	0	6	0	1	6	13
GTGAGTCGTAGGGCCGAACTCATCGTTCCAGGCCTCCGTGC	0	0	0	2	0	5	6	13
GGTGTCGTAAGGGCCGAACTTCATCGTTCCAGGCCCCGTGC	0	0	0	3	0	4	6	13
TGAGTTGTAGGGCCGAACCCATCGTTCCAGGCCCCGCGC	0	0	0	2	1	0	10	13
AGTGTTGTGGGGCCGGAACTCATCGTTCCAGGCCCCGTGC	11	0	0	1	0	1	0	13
GATGTGTGAGGGCCGAACTCATCGTTCCAGGCCCCGTGC	4	0	0	3	3	3	0	13
AATGTTGTCGGGCCGAACTCATCGTTCCAGGCCCCGTGC	7	2	0	3	1	0	0	13
GGTGTCGTAGGGCCGAACTTATCGTTCCAGGCCCCGTAGC	3	1	1	3	1	0	4	13
GAGTGTTGTAAGGGCCGAAACTCATCGTTCCAGGCCCCGTGC	6	3	1	1	2	0	0	13
TGAGTTGTAGGGCCGAACTCATCGTTCCAGGCCCCGTCT	3	0	0	6	1	1	2	13
GGGTGTCGGAGGGCCGAACTCATCGTTCCAGGCCCCGTGC	0	0	1	1	3	2	6	13
GGTGTCGTAGGGCCGAACTCATCGTTCCAGGCCCCGAG	0	0	0	2	2	5	4	13
AGTGTGTAGGGCTGAACTCATCGTTCCAGGCCCCCGTGC	2	2	1	7	1	0	0	13
GTGTGTCGGAGGGCCGAACTCATCGTTCCAGGCCCCGTGC	0	0	0	2	2	0	9	13
GAGTGTTGTAAGGCCGAACTCATCGTTCCAGGCCCCGTGC	5	2	1	5	0	0	0	13
GTGTGTCGTAGGGCCGAACTCATCGTTCCAGGCCCGTCG	1	0	0	4	2	4	2	13
GGTGTCGTCGGGGCCGAACTCATCGTTCCAGGCCCCGTGC	0	0	1	0	2	2	8	13
GGTGCGTAGGCCGAACTCATCGTTCCAGGCCCCGGTGC	0	0	1	2	1	4	5	13
AGTGTTGGTAGGGCCAACTCATCGTTCCAGGCCCCGTGC	3	5	3	1	1	0	0	13
GGTGGTCGTAGGGCCGAACTCATCGTTCCAGGCCCTGTGC	0	1	0	1	3	5	2	12
GAGTGTCGTAGGGCCGTAACTCATCGTTCCAGGCCCCGTGC	1	0	0	2	5	0	4	12
GGTGTCGTAGGGCCGAACCCATCGTTCCAGGCCCCGTTGC	1	0	0	1	5	2	3	12
GTGTTGTAGGGCCGAACTCATCGTTCCAGGCCCCGTAC	8	0	2	1	1	0	0	12
GTTAGTCGTAGGGCCGAACTCATCGTTCCAGGCCCCGTGC	0	0	0	3	0	4	5	12
GTGTGCGTAGGGCCCGAACTCATCGTTCCAGGCCCCGTGC	0	1	0	4	0	4	3	12
AGTGTTGGTAGGGCCCGAACCCATCGTTCCAGGCCCCGTGC	3	2	7	0	0	0	0	12
GGGTGCTGTAGGGCCGAACTCATCGTTCCAGGCCCCGTGC	2	0	1	4	3	1	1	12
GGATGTCGTAGGGCCGAACTCATCATTCCAGGCCCCGTGC	0	0	0	0	2	7	3	12
AGTGTCGTAGGTCGGCAACTCATCGTTCCAGGCCCCGTG	5	2	0	3	2	0	0	12
AGAGTTGTAGGGCCGAACTCATCGTCCCAGGCCCCGTGC	2	1	0	4	2	1	2	12
GGGTGTCGTAGGGCCGGACTCATCGTTCCAGGCCCCGTGC	2	0	0	2	3	2	3	12
AATGTTGTAGGGCCGAACTCATCGTTCCAGGCCCCGTG	10	0	1	1	0	0	0	12
GGTGTCTAGGGCCGAACTCATCGTTCCAGGCCCCGTGT	0	0	0	4	3	1	4	12
GAGTGTGTAGGGCCGAAACTCATCGTTCCAGGCCCGTGC	4	0	0	6	0	2	0	12
TGAGTTGTAGGGCCGAACTCATCGTTCCAGGCCCCTTGTGC	0	0	1	8	0	1	2	12
GTGTCGTAGGGCGAAACTCATCGTTCCAGGCCCCGTGC	1	0	1	1	1	3	5	12
GGTGTTGTAGGGCCGAACTCATCGTTCCAGGCCCCTGGC	1	0	1	3	4	1	2	12
GTGAGTGTAGGGCCGAACTCATCGTTCCAGGCCCCCTGTCG	4	0	0	1	1	2	4	12
GATGTGTGTAGGGCCGAACTCATCGTTCCAGGCCCGTGT	0	0	2	9	0	1	0	12
GTGAGTCGTAGGGCCGAACTCATCGTTCCGGCCCCGTGC	0	0	0	1	0	5	6	12
GGTGTCGTAGGGCCGAACCTCGTTCCATGCCCAGCCTGTCG	0	0	0	2	0	1	9	12
GGGTGTCGTAGGGCCGAAACTTATCGTTCCAGGCCCCGTGC	1	0	2	2	1	3	3	12
TGAGTTGTAGGGCCGAAGTCATCGTTCCAGGCCCCGTGC	0	0	0	8	1	0	3	12
GGTGTCGTAGGGCCGAAACTCATCGTTCCAGGCCCCGTA	0	0	0	3	1	6	2	12
TGAGTTGTAGGGCCGAACTTATCGTTCCAGGCCCCGTG	8	1	0	1	0	0	2	12
GGTGTCGTAGGGCCGAACTCATCGTTTCCCAAGGCCCCGTGC	0	0	0	1	1	4	6	12
TGAGTGTAGGGCCGAACTCATCGTTCCAGGCCCCGAGC	0	1	0	2	0	6	3	12
TGAGTGTAGGGCCGAAATCATCGTTCCAGGCCCCGTGC	1	1	1	1	1	2	5	12
AGAGTTGTAGGGCCGAACTCACGTTCCAGGCCCCGTGC	3	1	2	3	0	2	1	12
TGAGTTGTAGGGCCGAACTCATCGTTCCAAAAGGCCCCGTGC	2	1	0	1	1	2	5	12
ATGTGTTGTCGGGCCGAACTCATCGTTCCAGGCCCCGTGC	1	0	0	4	4	1	2	12
GTGAGTTGTAGGGCCGAACTCATCGTTCCAGGCCCCGTGGC	1	0	1	3	1	0	6	12
GGTGTCGTAGGGCCGAACTCATCGTTCCCAGGCCCCGTCCG	0	0	0	0	2	6	4	12
GGTGTACGTAGGGCCGAAACTCATCGTTCCAGGCCCCGTGC	1	0	0	2	0	2	7	12
TGAGTTGTAGGGCCAACTCATCGTTTCCAGGCCCCGTGC	1	1	1	3	0	1	5	12
GGTGGTCGTAGGGCCGAACTCATCGTTCCAGGCCCCGTCC	0	0	0	2	4	5	1	12
GGGAGTTGTAGGGCCGAACTCATCGTTCCAGGCCCCGCGC	0	0	0	2	4	3	3	12
GATCTGCGTAGGGCCGAACTCATCGTTCCAGGCCCCGTGC	1	0	2	4	2	3	0	12
AGTGTTGTAGGGCCGAACTCATCGTTCCAGGCCGGTGT	11	1	0	0	0	0	0	12
GGTGTCGTAGGGCCGAACCTCATTCCTGCCCAGGCCTGCG	0	0	0	0	4	3	5	12
GAGTGCGTAGGGCCGAACTCATCGTTCCAGGCCCTGTGC	0	0	0	5	2	4	1	12
GGGTGTTGTAGGGCCGAACTCATCGTTCCAGGCCCCCTGC	0	2	2	5	2	1	0	12
TGAGTGTAGGGCCGAACTCATCGTTCCAGGCCCCGTGA	0	0	0	3	0	6	3	12
GGTGTTGTAGGGCCGAACTCATCGTTCCAGGCCCTCGCG	0	2	2	7	0	1	0	12
ATGTGTTCTAGGGCCGAACTCATCGTTCCAGGCCCCGTGC	7	1	0	4	0	0	0	12
GAGTGTCGTAGGGCCGAACTCATCGTTCCAGGCCCCCTGCG	2	0	1	4	2	3	0	12
GATGTGTTGTAGGGCCGAAACTCATCGTTCCAGGCCCCGTGC	4	2	1	3	0	1	1	12
AGTGTTGTGGGGCCGAACTCATCGTTCCAGGCCCCATGC	8	1	1	2	0	0	0	12
GGTGTCGTAAGGGCCGAAACTCATCGTTCCAGGCCCCCGTGC	0	0	0	1	0	2	9	12
GTGTGTCGTCGGGCCGAACTCATCGTTCCAGGCCCCGTGC	0	0	1	5	0	3	3	12
GAGTGTTCGTAGGGGCCGAACTCATCGTTCCAGGCCCCGTGC	2	1	1	5	2	0	1	12
AGTGTCGTAGGCCGAACTCATCGTTCCCAGGCCCCGTGC	3	2	2	4	1	0	0	12
TGAGTTGTAGGGCCGAACTTATCGTTCCAGGCCCCGTGT	6	1	0	5	0	0	0	12
GGGTGTCGTAGGGCCGAACTCATCGTTCCAGCCCCCGTGC	0	0	0	0	6	4	2	12
AGTGTTGTAGGGCCGCCAACTCATCGTTCCAGGCCCCGTGC	4	2	4	2	0	0	0	12
AGTGTTGTAGGGCCGAAACTCATCGTTCCAGGCCCCGCCC	6	1	0	3	2	0	0	12
AGAGTTGTAGGGCCGAACTCATCGTTCCAGGCCCCGTC	2	0	0	3	2	3	2	12
TGAGTTGTCGGGCCGAACTCATCGTTCCCAGGCCCCGTGC	5	1	1	2	2	1	0	12
GGGTGTCGTAGGGCGAAACTCATCGTTCCAGGCCCCGTGC	1	0	0	3	2	3	3	12
AGTGTTGTAGGGCCGAACTCATCGTTAACCAGGCCCCGTGC	3	1	3	4	0	1	0	12
AGTGTTGTAGGGCCGTTAACTCATCGTTCCAGGCCCCGTGC	5	0	5	2	0	0	0	12
GGGTGTCGTAGGGCCGAACTCATCGTTCAAGGCCCCGTGC	0	0	0	1	2	2	7	12
GACTCGTAGGGCCGAACTCATCGTTCCAGGCCCCGTGC	2	0	1	8	0	0	1	12
AGTGTGTAGGGCCGAACTCATCGTTCCGGGCCCCGTGC	4	1	3	4	0	0	0	12
AGTGTGTAGGGCCGAACTCATCGATCCAGGCCCCGTGC	4	2	0	6	0	0	0	12
GGGTGTGGTAGGGCCGGAACTCATCGTTCCAGGCCCCGTGC	0	1	0	4	0	4	3	12
AGTGTTCTAGGCCGAACTCATCGTTCCAGGCCCCGTGT	7	0	1	1	2	1	0	12
GTGTGCGTAGGGCCGAACTCATCGTTCCAGCCCCGTGC	0	1	1	3	2	2	3	12
GATGTCGTAGGGCCGAACTTCATCGTTCCAGGCCCCGTGC	0	0	0	3	2	5	2	12
AGAGTTGTAGGCCGAACTCATCGTTCCAGGCCCCGTAC	4	0	1	3	1	1	2	12
GGGTGTCGTAGGGCCGAACTCATCGATCCAGGCCCCGTGC	1	0	0	3	1	2	5	12
CGAGTTGTAGGGCCGAACTCATCGTTCCAGGCCCGTGC	4	1	0	4	1	1	1	12
GAGTGTCGTAGGGCCGAACTCATCGTTCCCAGGCCCGTGC	3	0	0	1	4	3	1	12
GAGACGTAGGGCCGAACTCATCGTTCCAGGCCCCGTGC	1	0	0	1	4	5	1	12
GTGAGTCGTAGGGCCGAACTCATCGTTCCAGGCCCCGCCG	1	0	0	6	1	2	2	12
AGAGTTGTAGGCCGAACTCATCGTTCCAGGCCCCCGTGC	4	1	1	3	0	1	2	12
GGTGTCGTAGGGCCGAAATCATCGTTGCCAGGCCCCGTGC	1	0	0	0	2	7	2	12
TGATGTTCTAGGGCCGAACTCATCGTTCCAGGCCCCGTGC	7	0	1	4	0	0	0	12
GGTGTGCGTAGGGCCGAACTCATCGTTCCAGGCCCCGTCGC	0	0	0	2	3	5	2	12
TGAGTTGTAGGGCCAACTCATCGTTCCAGGCCCCGTGT	5	1	1	5	0	0	0	12
AGAGTTATAGGCCGAACTCATCGTTCCAGGCCCCGTGC	4	0	1	4	1	1	1	12
AGTGTTTGTCGGGCCGAACTCATCGTTCCAGGCCCCGTGC	9	1	0	1	1	0	0	12
AGAGTTGTAGGGCCGAACTCATCGTTCCAGGCCTCCGTGC	1	0	2	3	2	3	1	12
GGTGTCGTAGGGCCGAACTCACGTTCCAGGCCCCGTGGC	0	0	0	2	0	2	8	12
GAGTGTGTAGGCCGAACTCATCGTTCCCAGGCCCCGTGC	0	0	3	5	1	2	1	12
GGTGCGTAGGGCCGAACTCATCGTTCCCAGGGCCCCGTGC	0	0	0	0	3	4	5	12
GAGTCGTAGGGCCGAACTCATCGTTCCAGGCCCCGGTGC	2	0	0	4	0	2	4	12
GTGACGTAGGGCCGAACTCATCGTTCCAGGCCCCCGTGC	0	0	2	2	3	2	3	12
GTGTGCGTAGGGCCGAACTCATCGTTCCCAGGCCCCGTGC	0	1	0	3	2	2	4	12
GTGTGTCGTAGGGCCGAACTTATCGTTCCAGGCCCCGTGC	1	0	1	7	0	2	1	12
TGAGTTGTAAGGGCCAACTCATCGTTCCAGGCCCCGTGC	1	1	0	4	1	2	3	12
GGTGTCGTAGGGCCGCCCAACTCATCGTTCCAGGCCCCGTGC	0	1	0	3	1	6	1	12
GGTGTCGTAGGGCCGAACTTGATCGTTCCAGGCCCCGTGC	0	0	0	2	2	1	7	12
GGGTGTTGTAGGGCCGAACTCATCGTTCCAGCCCCGGTGC	0	0	1	6	2	1	2	12
AGTGCTGTAGGGCCGAACTCATCGTTCCAGGCCCGTGT	7	1	0	2	2	0	0	12
GAGTGCGTAGGGCGAACTCATCGTTCCAGGCCCCGTGC	0	0	1	4	2	4	0	11
GGGTGTCGGCTAGGGCCGAACTCATCGTTCCAGGCCCCGTGC	1	0	0	3	1	5	1	11
GAGTGTCGTAGGGCCGAACCTCATCGTTCCAGGCCCCGTGC	0	0	2	5	2	2	0	11
AGTGTTGTAGGGCCGAATCAATCGTTCCAGGCCCCGTGC	4	2	1	1	2	1	0	11
GTCGAGTGTAGGGCCGAACTCATCGTTCCAGGCCCCCGTGC	2	0	0	3	3	0	3	11
GGATGTCAGTAGGGCCGAACTCATCGTTCCAGGCCCCGTGC	0	1	0	2	0	5	3	11
TGAGCTGTTGGGCCGAACTCATCGTTCCAGGCCCCGTGC	0	0	0	3	0	7	1	11
AGTGTTGTAGGGCCGAACTCATCGTTCCAGCCCCCGCCC	11	0	0	0	0	0	0	11
GAGTCGTAGGGCCGAACTCATCGTTCCAGGCCTCGTGC	1	0	0	3	1	1	5	11
GAGTGTGTAGGGCCGAACTCATCGTTCCAGGCCCCGGGC	0	0	0	10	1	0	0	11
GGTGTCGGTAGGGCCGAACTCATCGTTCCAGGCCCGTGT	0	0	2	1	3	4	1	11
AGTGTTGCCTAGGGCCGAACTCATCGTTCCAGGCCCCGTGC	5	1	1	4	0	0	0	11
GATGTGTCGTAGGGCCGAACTCATCGTTCCAGGCCCCAGTGC	1	0	1	7	1	1	0	11
AGTATTGTAGGGCCGAACTTATCGTTCCAGGCCCCGTGC	8	2	0	1	0	0	0	11
AGTGTTGTAGGGCCGAACCTCATCGTTCCAGGCCCCCGTGC	4	0	3	4	0	0	0	11
AGTGTTGCAGGGCCGAACTTATCGTTCCAGGCCCCGTGC	7	2	0	2	0	0	0	11
AGTGTTGTAGGGCCGAACTCGATCGTTCCAGGCCCCCGTGC	5	0	2	3	1	0	0	11
GAGTCGTAGGGCCGAACTCATTCGTTCCAGGCCCCGTGC	2	0	0	5	0	4	0	11
GAGTGCGTGGACGGCAACTCATCGTTCCAGGCCCCGTGC	1	0	2	6	2	0	0	11
GGTGCGCTAGGGCCGAACTCATCGTTCCAGGCCCCGTGC	0	0	2	4	0	4	1	11
GGTGTCGTAGGGCCGAACTCATCGTTCCAGGCCCGCCG	1	0	0	3	0	3	4	11
GAGTGTTGTAGAGCCGAACTCATCGTTCCAGGCCCCGTGC	11	0	0	0	0	0	0	11
TGAGTTTGTAGGGCCCGAACTCATCGTTCCAGGCCCCCGTGC	3	1	0	5	1	0	1	11
AGTGTTCTAGGGCCGAACTCATCGTTCCAGGCCCCGTG	6	0	2	3	0	0	0	11
GGTGTCGTAGGGCCAAATCATCGTTCCAGGCCCCGTGC	0	0	0	1	1	1	8	11
GGATGTCGTAGGGCCGAACTCATCGTTCCAGGCCCCGCGC	0	0	0	7	0	0	4	11
GGTGTCGTAGGGCGAACTTCATCGTTCCAGGCCCCGTGC	0	0	2	2	1	1	5	11
GATGTGTCGTAGGGCCGAACTCATCGTTCCAGGCCCCTGTGC	0	0	0	4	2	2	3	11
AGTGTTGGTAGGGCCGAACTCATCGTTCCCAGGCCCCGTGT	6	1	2	2	0	0	0	11
GGGTGTCGTATGGCCGAACTCATCGTTCCAGGCCCCGTGC	0	1	0	1	2	3	4	11
TGAGTCTAGGTCGGCAACTCATCGTTCCAGGCCCCGTGC	1	0	1	7	1	0	1	11
GGTGTCGTAGGGCCGAACACATCGTTCAGGCCCCGTGC	1	0	0	1	2	4	3	11
GGTGTCAGTAGGGCCGAACTCATCGTTCCAGCCCCGTGC	0	1	1	2	2	1	4	11
TGAGTTGTAGGGCCCGAACTCATCGTTCCCAGGCCCCCGTGC	0	1	0	4	1	0	5	11
GTGGATCGTAGGGCCGAACTCATCGTTCCAGGCCCCGTGC	0	0	0	3	0	4	4	11
GGTGTCGTAGGGCCGAAACTCATCGTTCCAGGCCCCCGTCGC	0	0	2	1	2	2	4	11
TGAGCCGTAGGGCCGAACTCATCGTTCCAGGCCCCGTGC	0	0	0	0	10	1	0	11
GGTGTTGTAGGGCGAACTCATCGTTCCAGGCCCCAGTGC	0	1	1	4	2	0	3	11
GGTGTCGTAGGGCCGAACTCATCGTTCCAGGCCCCATC	0	0	0	2	4	3	2	11
GGTGTCGTAGGGCCGAACCTCAATCGTTCCAGGCCCCGTGC	0	0	1	0	2	7	1	11
GGTGTCGTAGGGCGAACTCATCGTTCCAAGGCCCGTGC	0	1	0	1	0	7	2	11
GGTGTCGTAGGGCCGAACTCATCGTTCCAGGCCCCAGTAGC	1	0	0	3	0	3	4	11
GTGACTTGGTACGGCAACTCATCGTTCCAGGCCCCGTGC	0	0	0	6	2	3	0	11
GTGTGTCGTAGGGCCGAACTCATCGTTCCAGGCCCCGTAGC	0	0	2	3	1	4	1	11
ATGAGTGTAGGGCCGAACTCATCGTTCCCAGGCCCCGTGC	0	0	0	1	5	1	4	11
AGTGTTGTAGGCCGAACTCATCGTTCCAGGCCCAGTGC	6	1	1	3	0	0	0	11
GATGTGCTGGACGGCAACTCATCGTTCCAGGCCCCGTGC	3	0	0	7	0	1	0	11
GAGTCGTAGGGCCGAACTCATCGTTCCAGGCCCCGCCG	9	0	0	2	0	0	0	11
GAGTCGTAGGGCCGAACTCATCGTTCCAGGCCCACGTGC	0	0	0	7	2	1	1	11
GGTGTTGTAGGGCCGAACTCATCGTTCCAGGCCCCCGCTGC	0	0	1	5	1	3	1	11
AGTGTTGTAGGGCCGAACTCATCGTTTCAGGCCCCGTGT	6	4	1	0	0	0	0	11
GGTGTCGTAGGGCCGAACTCATCGTTCCCAGGCCCCGGGC	0	0	0	4	1	2	4	11
GGTGCGTAGGGCCGTAACTCATCGTTCCAGGCCCCGTGC	0	0	0	1	2	5	3	11
GGTGTCGTAGGGCCGAACTCATCGTTCCAAGCCCCGTG	1	0	0	1	2	6	1	11
GGTGTCGTAGGGCCGGAACTCATCGTTCCAGGCCCCGTAGC	0	1	0	2	2	0	6	11
GGATGTCGTAAGGCCGAACTCATCGTTCCAGGCCCCGTGC	0	3	0	1	2	4	1	11
GGTGTCGTAGGGCCGAACTCATCTTCCAGGCCCCATGC	0	0	1	1	0	5	4	11
GGTGTCGTAGGGCCGAACTCACGTTGCCAGGCCCGTGC	0	1	1	3	3	2	1	11
AGTTTGTAGGGCCGAACTCATCGTTCCAGGCCCCCGTGC	5	1	3	1	1	0	0	11
AGTGTCTGGTCGGCAACTCATCGTTCCAGGCCCCGTGC	10	0	0	1	0	0	0	11
GTGATGTCGCTAGGGCCGAACTCATCGTTCCAGGCCCCGTGC	0	0	0	4	4	2	1	11
GGGTGCGTAGGGCCGAACTCACGTTCCAGGCCCCGTGC	0	0	0	2	3	1	5	11
GGTGTCGTAGGGCCGAACTCATCGTTGCCAGGCCCCGTGT	1	1	0	3	0	3	3	11
GGTGTCGTAGGGCCGAACTCATCGTTCCAGGCCCGGCG	0	0	0	1	0	6	4	11
GTGAGTTGTAGGGCCGAACTCATCGTTCCAGGCCCCTGTGC	1	0	2	5	0	1	2	11
GGTGTCGTAGGGGCCGAACTCATCGTTCAGGCCCCGTGC	0	0	0	3	0	5	3	11
GTGATGTACTAGGGCCGAACTCATCGTTCCAGGCCCCGTGC	0	0	0	2	2	2	5	11
GGTGTCGTAGGGCCAACCCATCGTTCCAGGCCCCGTGC	0	0	2	2	0	2	5	11
GTGAGCTGGTCGGCAACTCATCGTTCCAGGCCCCGTGC	2	0	1	3	0	4	1	11
GAGTCTTGTAGGGCCGAACTCATCGTTCCAGGCCCCGTGC	8	0	0	3	0	0	0	11
GGTCGTCAGTAGGGCCGAACTCATCGTTCCAGGCCCCGTGC	0	0	1	1	1	2	6	11
GGTGTCGTAGGGCCGCAACTCATCGTTGCCAGGCCCCGTGC	1	2	0	1	3	2	2	11
GGTGTCGTAGGGCCGTAACTCATCGTTCCAGGCCCCGTG	0	0	0	3	2	0	6	11
AGTGGTGTAGGGCCGAACTTATCGTTCCAGGCCCCGTGC	11	0	0	0	0	0	0	11
GGTGTCGTAGGGACCGAACTCATCGTTCCAGGCCCCGTGT	0	0	2	1	4	2	2	11
TGAGTGGTAGGGCCGAAACTCATCGTTCCAGGCCCCGTGC	3	1	0	1	0	2	4	11
GTGTGTCGTAGGGCCGAACTCATCGTTCCAGGCCCCGTGTC	0	0	0	4	2	5	0	11
GGAGTTGGTAGGGCCGAACTCATCGTTCCAGGCCCCGTGC	0	0	0	3	2	5	1	11
GAAGTGTGTAGGGCCGAACTCATCGTTCCAGGCCCCGTGC	3	2	1	4	0	1	0	11
AGTGTTGTAGGGCCGAACTTATCGTTCTAGGCCCCGTGC	11	0	0	0	0	0	0	11
AGTGTGTAGGGCCGAAGCTCATCGTTCCAGGCCCGTGC	3	2	2	4	0	0	0	11
GGTGTGTCGTAGGGCCGAACTCATCGTCCAGGCCCCGTGC	0	0	0	1	2	2	6	11
GTGAGTGTAGGGCCGAACTCATCGTTCCAGGCCCCCGGTGC	0	0	0	0	2	2	7	11
AGAGTTGTAGGGCCGAACTCATCGTTCCAGGCCCCGCCG	8	0	0	2	0	1	0	11
AGAGTTGTAGGGCCGAACTCATGGTTCCAGGCCCCGTGC	3	0	0	8	0	0	0	11
ATGATGTTGTAGGGCCGAACTCATCGTTCCAGGCCCGTGC	0	0	1	7	1	2	0	11
AGTGTTGTAGGGCCGAACTCATCGTTCCAGGCCCGCAC	9	2	0	0	0	0	0	11
GGTGCGTAGGGCCGAACTCAATCGTTCCCAGGCCCCGTGC	0	0	0	0	2	5	4	11
GATGTGTCGTACGGGCCGAACTCATCGTTCCAGGCCCCGTGC	1	0	1	4	2	2	1	11
GGGTGTCGTAGGGCCGAACTCATCGTTCCAGGCCCCCGTCCC	1	0	0	2	1	2	5	11
GGTGTCGTAGGGCCGAACTCATCGTCCAGGCCCCGTACG	0	0	0	2	3	3	3	11
TGAGTTGTAGGGCCGAACTCATCGTTCCAAGGCCCCGTG	1	0	0	3	1	3	3	11
AGAGTTGTAGGGCCGAACTCATCGTTCCAGGCCCGTAC	6	0	0	5	0	0	0	11
GGGTGTTGTAGGGCCGAACTCATCGTTCCAGGCCCCTTGC	3	1	2	0	3	2	0	11
TGAGTTGTAGGGCCAACTCAATCGTTCCAGGCCCCGTGC	1	1	0	4	0	1	4	11
GGGAGTTGTAGGGCCGAACTCATCGTTCCAGGCCCCGGTGC	1	0	0	1	0	6	3	11
GGTGTGGTAGGGCCGAACTCATCGTTCCAGGCCCCGTG	0	0	1	1	0	3	5	10
GGTGTCCGTAGGGCCAACTCATCGTTCCAGGCCCCGTGC	0	0	0	1	2	5	2	10
GGTGTCGTAGGGGCCGAACTCATCGGTTCCAGGCCCCGTGC	0	0	1	2	3	2	2	10
TGAGTGTAGGGCCGAACTCATCGTTTCAGGCCCCGTGC	0	0	1	4	1	0	4	10
GGTGTCGTAGGGCCGAACTTATCGTTGCCAGGCCCCGTGC	2	0	0	0	0	2	6	10
AGTGTTGTAGGGCCGAACTCATCGTTCCAGGCCCCGGTGCC	5	1	0	3	1	0	0	10
GTGTGCGTAGGGCCGAACTCATCGTTCCAGGCCCCGTACG	1	0	0	3	1	3	2	10
GTGTGTTGTAGGGCCGAAACTCATCGTTCCAGGCCCCGTGC	0	0	1	4	3	1	1	10
TGATGTGTAAGGGCCGAACTCATCGTTCCAGGCCCCGTGC	1	0	0	3	0	1	5	10
GAGTGTGTAGGGCCGAACTCATCGTTCCAGCACCGTGC	1	1	0	3	3	1	1	10
GGGTGTCGTAGGGCCGAAACTCATCGTTCCAGGCCCCGTAGC	0	0	0	1	1	0	8	10
GTGTGTGTAGGGCCGAACTCATCGTTCCAGGCCCCCGCG	1	0	0	6	0	1	2	10
GTGTGTCGTAGGGCCGAACTCATCGTTCCAGGCCCCGTTGC	0	1	0	1	0	4	4	10
GGTGTTGTAGGGCGAACCTCATCGTTCCAGGCCCCGTGC	0	1	1	5	1	1	1	10
GGTGTCGTAGGGACCGAACTCATCGTTCCAGGCCCCGGTGC	2	0	0	0	0	3	5	10
GGCGTGCGTAGGGCCGAACTCATCGTTCCAGGCCCCGTGC	1	0	1	4	1	2	1	10
TGAGTTGTAGGGCCGAACTCATCGTTCCAGGCCCCGGTGCC	1	0	0	1	0	1	7	10
ATGTGTTGTAGGGCCGAACTCATCGTTCCAGGCCCGGTGC	6	0	0	4	0	0	0	10
[truncated: 11,149 more rows]
