# Supplementary material for: Cell-SELEX Identifies a “Sticky” RNA Aptamer Sequence
Source: J Nucleic Acids. 2017 Jan 17;2017:4943072. doi: 10.1155/2017/4943072 (PMC5282457; doi:10.1155/2017/4943072)
Supplement: Supplementary file 2 [file 4943072.f2.docx]

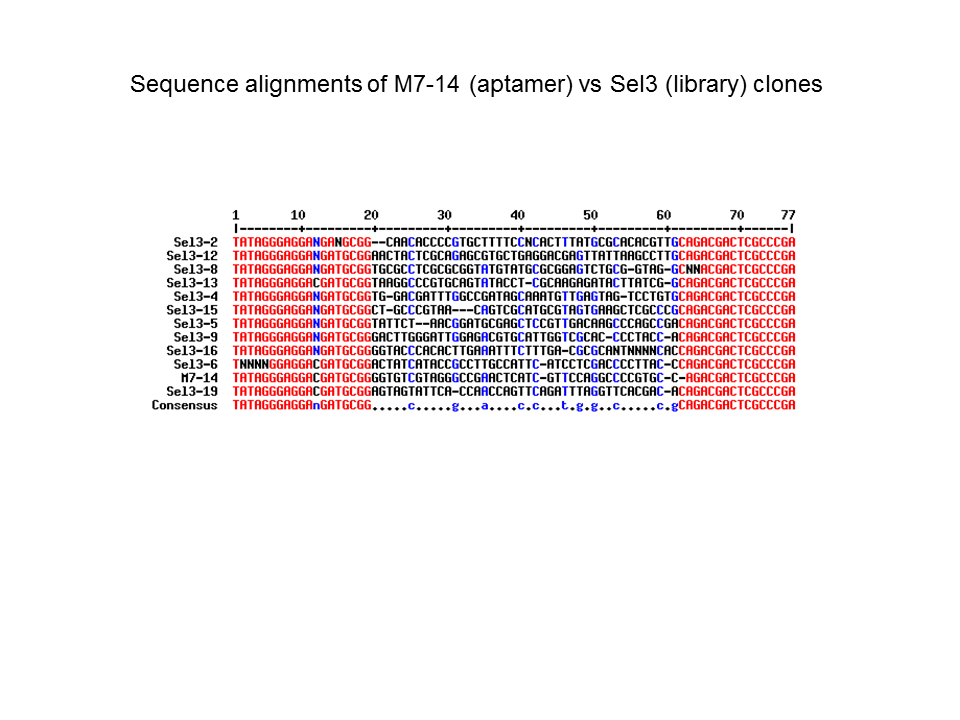


**Supplementary Figure 1:** **Sequence alignment of M7-14 (aptamer) and Sel 3 (starting library) clones:** Sequence alignment of Sel 3 clones confirmed the randomness of the variable region, indicating that the early enrichment of M7-14 sequence was not a consequence of bias in the initial starting library.


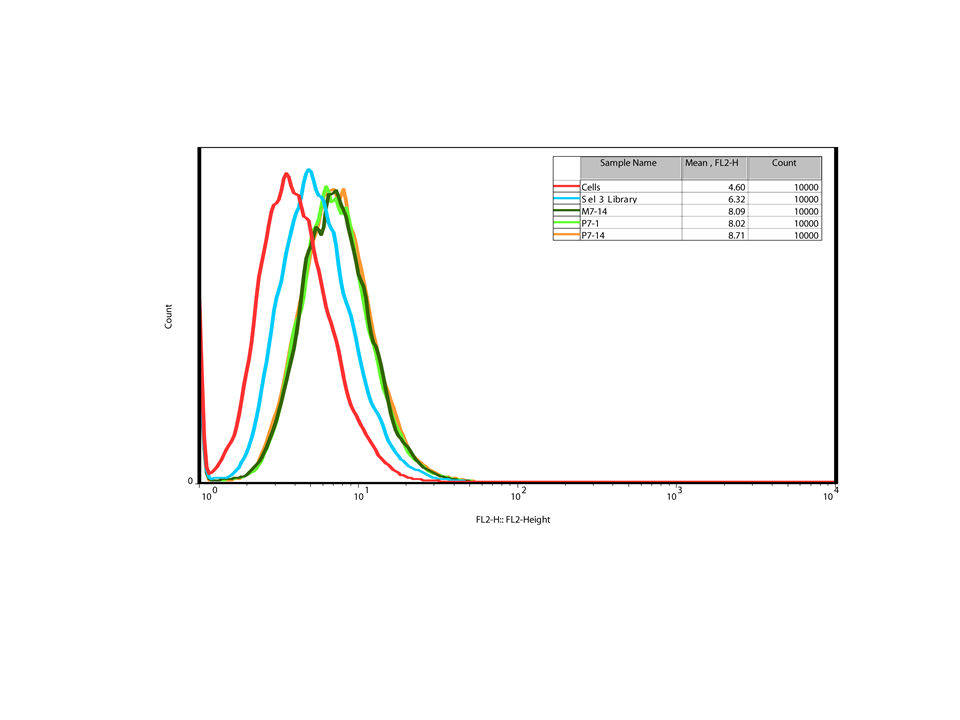


**Supplementary Figure 2: Cell internalization assay of the selected aptamers by flow-cytometry:** SA-PE labeled aptamers and the control Sel 3 library (180 nM) were incubated with the Panc-1 cells for 30 minutes at 37⁰C. Following which, the cells were treated with 2µl of Riboshredder at 37⁰C for 5 minutes. The cells were then washed in DPBS buffer containing MgCl2 and CaCl2 and then treated with trypsin to remove the cell surface proteins associated with the labeled aptamers. The pelleted cells were then washed in DPBS buffer containing MgCl2 and CaCl2 and analyzed by flow cytometry.


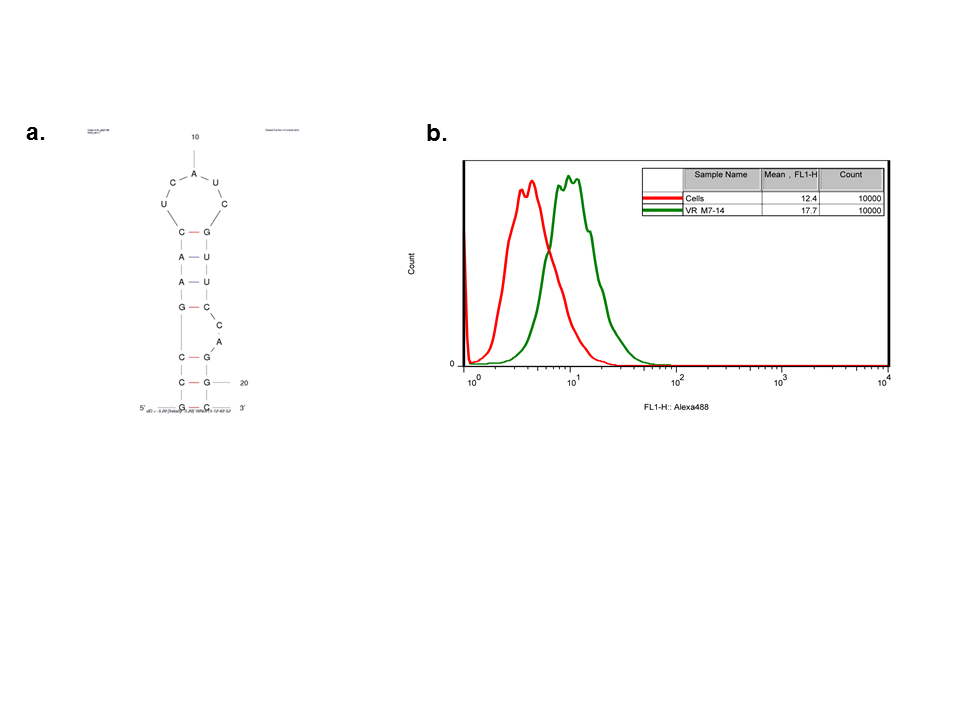


**Supplementary Figure 3: Cell internalization assay of the Variable Region (VR M7-14, 21 nt “domain”) by flow cytometry:** a) M-fold prediction of the secondary structure of the 21 nucleotides VR “domain”. b) VR M7-14 (21 nt “domain”) conjugated with 5ꞌAlexa 488 dye was incubated with Panc-1 cells (200 nM) for 1 hour at 37⁰C. Following incubation, the cells were washed in DPBS buffer containing MgCl2 and CaCl2 and then trypsinized to remove the cell-surface adhering aptamers. The pelleted cells were then washed in DPBS buffer containing MgCl2 and CaCl2 and analyzed by flow cytometry.
